# Supplementary material
Source: publisher figshare collection journal article supplement (https://karger.figshare.com/articles/dataset/_/5120446)
Supplement: Supplementary file 1 [file 1]

Figure S1. Amino-acid alignment of cluster A GH18 catalytic domains.

|                      | 10                                                                      | 20 | 30 | 40 | 50 | 60 |
|----------------------|-------------------------------------------------------------------------|----|----|----|----|----|
| NP_979924_B._cereus  | ..... ..... ..... ..... ..... ..... ..... ..... ..... ..... ..... ..... |    |    |    |    |    |
| YP_077302_B._licheni | ..... ..... ..... ..... ..... ..... ..... ..... ..... ..... ..... ..... |    |    |    |    |    |
| YP_091539_B._licheni | ..... ..... ..... ..... ..... ..... ..... ..... ..... ..... ..... ..... |    |    |    |    |    |
| YP_079121_B._licheni | ..... ..... ..... ..... ..... ..... ..... ..... ..... ..... ..... ..... |    |    |    |    |    |
| YP_074366_S._thermop | ..... ..... ..... ..... ..... ..... ..... ..... ..... ..... ..... ..... |    |    |    |    |    |
| YP_075811_S._thermop | ..... ..... ..... ..... ..... ..... ..... ..... ..... ..... ..... ..... |    |    |    |    |    |
| YP_075619_S._thermop | ..... ..... ..... ..... ..... ..... ..... ..... ..... ..... ..... ..... |    |    |    |    |    |
| ZP_01354047_C._phyto | ..... ..... ..... ..... ..... ..... ..... ..... ..... ..... ..... ..... |    |    |    |    |    |
| ZP_01354926_C._phyto | ..... ..... ..... ..... ..... ..... ..... ..... ..... ..... ..... ..... |    |    |    |    |    |
| NP_902406_C._violace | ..... ..... ..... ..... ..... ..... ..... ..... ..... ..... ..... ..... |    |    |    |    |    |
| ZP_01136704_A._cellu | ..... ..... ..... ..... ..... ..... ..... ..... ..... ..... ..... ..... |    |    |    |    |    |
| ZP_00526542_S._usita | ..... ..... ..... ..... ..... ..... ..... ..... ..... ..... ..... ..... |    |    |    |    |    |
| AAF46212.1_D._melano | ..... ..... ..... ..... ..... ..... ..... ..... ..... ..... ..... ..... |    |    |    |    |    |
| AAF46534.1_D._melano | ..... ..... ..... ..... ..... ..... ..... ..... ..... ..... ..... ..... |    |    |    |    |    |
| AAF46544.1_D._melano | ..... ..... ..... ..... ..... ..... ..... ..... ..... ..... ..... ..... |    |    |    |    |    |
| At4g19720_A._thalian | ..... ..... ..... ..... ..... ..... ..... ..... ..... ..... ..... ..... |    |    |    |    |    |
| At4g19750_A._thalian | ..... ..... ..... ..... ..... ..... ..... ..... ..... ..... ..... ..... |    |    |    |    |    |
| EAA67655_G._zeae     | .KRNMLYFTNWG.TYE...G....FN..PEN..LPVK...EITHVLYSFAK..VN...              |    |    |    |    |    |
| EAA73155_G._zeae     | .SVNAVYFVNWG.IYG...RN....YQ..PMN..LPAS...QLTHVLYAFLN..VR...             |    |    |    |    |    |
| EAA74986_G._zeae     | .PVNAVYFTNWG.IYG...RN....FQ..PQD..LPAS...EITQVLF AFLN..VK...            |    |    |    |    |    |
| EAA74223_G._zeae     | .FRTVAYFVNWA.IYA...RK....HR..PQD..LPVE...NLTHILYSFAN..IR...             |    |    |    |    |    |
| MGG_05533_M._grisea  | .YRSVAYVTNWS.IYG...AK....FL..PEQ..IAVD...SISHVQYAFAD..IL...             |    |    |    |    |    |
| MGG_01247_M._grisea  | .YRSVLYFTNWG.IYG...AN....YQ..PQD..LPVD...TVTHILYSFAN..IA...             |    |    |    |    |    |
| MGG_00086_M._grisea  | .LQNVAYFVNWG.IYG...RN....FH..VQN..VSAD...KVTHLLYAFAN..LR...             |    |    |    |    |    |
| MGG_07927_M._grisea  | .QRTVAYFVNWA.IYG...RK....HR..PQE..LPAD...KLTHVLYAFAN..VK...             |    |    |    |    |    |
| Chi18_6_H._jecorina  | .KKNVVYYADWS.IYD...AA....FL..PQQ..LP AE...DITHLLYAFAG..IE...            |    |    |    |    |    |
| Chi18_5_H._jecorina  | .FANAVYFTNWG.IYG...RN....FQ..PAD..LVA S...DITHVIYSFMN..LQ...            |    |    |    |    |    |
| Chi18_7_H._jecorina  | .YRSVAYFVNWA.IYA...RK....HR..PQD..LPVE...KLTHVLYAFAN..VR...             |    |    |    |    |    |
| 04883_N._crassa      | .YKNVVYFTNWG.IYG...RN....YQ..AAD..LPAD...KITHVLYSFAN..LK...             |    |    |    |    |    |
| 04554_N._crassa      | .YRTVAYFVNWA.IYG...RK....HR..PQD..LP AE...KLTHILYAFAN..VR...            |    |    |    |    |    |
| 11407_B._fuckeliana  | .YHNAA YFVNWA.IYG...RN....YQ..PQQ..LPAT...KLTHVLYAFAN..LQ...            |    |    |    |    |    |
| 05350_B._fuckeliana  | .YRAVAYFVNWA.IYG...RK....HF..PQE..LP AE...KLTHILYAFAN..VR...            |    |    |    |    |    |
| 11700_S._sclerotioru | .YHNTAYFVNWA.IYG...RN....YQ..PQQ..LPAS...KLTHIYAFAN..LK...              |    |    |    |    |    |
| 11304_S._sclerotioru | .YRAVAYFVNWA.IYG...RK....HF..PQE..LP AE...KLTHVLYAFAN..VR...            |    |    |    |    |    |
| 08020_S._sclerotioru | .....A.IYG...RQ....FF..PQE..LPVA...NLTHVLYAFAN..ID...                   |    |    |    |    |    |
| 01250_A._capsulatum  | .FKTVGYFTNWG.IYG...RN....YQ..PLD..IPGN...HLTHILYSFAN..VK...             |    |    |    |    |    |
| 05886_A._capsulatum  | .FKSVVYFVNWA.IYG...RN....YQ..PQD..LPAA...KLTHVLYAFAN..VH...             |    |    |    |    |    |
| 06565_A._capsulatum  | .YKSIVYYVNWA.IYA...RN....YN..PQD..LPVK...KLTHVLYAFAN..VR...             |    |    |    |    |    |
| 05250_C._immitis     | .YKTVAYFTNWG.IYG...RN....YQ..PNN..IPAS...HITHILYSFAN..IR...             |    |    |    |    |    |
| 02795_C._immitis     | .FRSVVYFVNWA.IYG...RG....HN..PQD..LKAD...QFTHILYAFAN..IR...             |    |    |    |    |    |
| 03822_C._immitis     | .YKSIVYYVNWA.IYD...RQ....YN..PQD..MPVD...KITHVLYAFAN..IR...             |    |    |    |    |    |
| AN5454_E._nidulans   | .YRSMAYFVNWA.IYA...RH....HN..PQD..LPVS...HLTHILYAFAN..VR...             |    |    |    |    |    |
| AN4871_E._nidulans   | .YKTVGYFVNWA.IYG...RN....YN..PQD..LP AE...KLTHILYAFAN..VR...            |    |    |    |    |    |
| 00269_P._nodorum     | .YKNVAYFVNWA.IYG...RN....FN..PQD..LPQ G...ELTHVLYAFAN..VR...            |    |    |    |    |    |
| 04870.1_C._cinereus  | .KKS VGYFVNWG.IYG...RK....Y..MPTY..IPAN...DLTHILYAFAN..IN...            |    |    |    |    |    |
| 09921.1_C._cinereus  | .KANFAYFTNWG.IYG...AN....FQ..PTD..IVPD...YITHILYSFAD..TD...             |    |    |    |    |    |
| 124149_P._chrysospor | .....G.IYG...RK....F..PPHK..IPAQ...DLTHILYAFAN..IR...                   |    |    |    |    |    |
| 134311_P._chrysospor | .KANMAYFTNWG.IYG...AN....FQ..PTD..INPG...PLTHILYAFAD..VS...             |    |    |    |    |    |
| 03412_F._neoformans  | .KRTVGYFVNWG.IYG...RK....F..FPQN..IPGQ...HLTHINYAFGN..VK...             |    |    |    |    |    |
| 13635_R._oryzae      | .PVVAGYFANWG.IYD...RK....YNVVDLA..LQAD...KLTHILYAFAN..LQ...             |    |    |    |    |    |
| UM04261_U._maydis    | .RVNLAYFTNWG.IYG...RK....Y..SPLD..VPYC...NLTHVLYAFAD..VN...             |    |    |    |    |    |
| EAA69503_G._zeae     | .FTNAVYFPNYR.IYQ...GD.....TPGM..LNYS...CINHVYYAYAS..VS...               |    |    |    |    |    |
| EAA70860_G._zeae     | .YINAVYYP SWR.CYK...ER.....PPSC..LDIS...SITHIFYAFV GQVSS...             |    |    |    |    |    |
| Chi18_3_H._jecorina  | .YTNAVYFPSSR.IYQ...GD.....SPGM..LNYS...CINHVYYAYAS..VT...               |    |    |    |    |    |
| Chi18_2_H._jecorina  | ..MNGVYYP SWL.VYK...GK.....TPAT..LDID...NITHLT.....                     |    |    |    |    |    |
| 03026_N._crassa      | .YNNAVYWP N HS.VYR...GD.....TPGS..LNYG...CINRVYYAFAN..IM...             |    |    |    |    |    |
| 01594_B._fuckeliana  | .YKNAVYYPNYR.VYR...GE.....TPGS..LNFG...CISHVFYAFAH..VG...               |    |    |    |    |    |
| 05897_S._sclerotioru | .YKNAVYYPNYR.VYR...GE.....TPAS..LNFS...CISHVFYAFAH..VG...               |    |    |    |    |    |

|                      |                                                             |
|----------------------|-------------------------------------------------------------|
| 04742_A._capsulatum  | ...MIYKGKGGK.PRR...KY.....PQSS...GSPR...HFNFLGYNYSF...NQ... |
| 04750_C._immitis     | .YFNNAVYPSWR.IYK...KQ.....PPSS...LRLG...CVSHVFYAFAW..VN...  |
| 04719_P._nodorum     | .YWNNAVYPNWR.IYR...DQ.....PPVS...LNYD...VISHVFYAFAW..VK...  |
| MGG_08458_M._grisea  | .YINNAVYPNWR.IYK...QL.....PPSK...LQVN...NITHVFYAFIG..VN...  |
| CHT4_C._albicans     | .FKTCVYFSNWS.VYQ...KK...HF..PQD..IPIE...YFTHIFYAFIL..ID...  |
| 01119_L._elongisporu | .FKSCVYFTNWA.VYE...KK...HF..PCD..IPYE...YYSHIFYAFIA..VD...  |
| XP_454053_K._lactis  | .FSVATYYSNWS.PYN...ARN...HK..PAD..IPTS...QLTHVYYAFFV..VD... |
| CTS2_S._cerevisiae   | .FISGVYYSNWS.PYK...PRF...HF..PHD..INLK...QVSHIYYAFFK..IN... |
| 246746_L._bicolor    | .KYSVGYFVNWG.IYG...RK...F..PPSL..IPVQ...DLTHILYAFAN..VR...  |
| 03209_N._crassa      | .YRNAVYFTNWG.IYG...AN...FQ..PQQ..LPAS...QITHALTPSR.....     |
| 14474_P._nodorum     | .YQSQVFYTNWA.MYG...RK...HF..VTD..LPAD...HLTKINYGFAN..VN...  |
| CE06282_C._elegans   | .KRIIGYYSGSG.TSN.....ITS..TQLS...NLTHTVFAFVYMTDPG..         |
| CE03547_C._elegans   | .KRIIGYFATQ.TSV.....ITR..DQVS...KLTHAVFAFVNMTSDG..          |
| CE03542_C._elegans   | .KRIIGYYSENE.TTD.....ITK..RQLS...KLTHAIFAFIKLQPDG..         |
| CE15845_B_C._elegans | .KRTVGFFTGNS.TTS.....ITQ..DQMR...KLTHATFCRIFLNST...         |
| CE02997_C._elegans   | .KRIVGYFAEFE.NSP.....LSK..KQLQ...MLTHIYLFaip.KNG..          |
| CE36953_C._elegans   | .RRRVGYITSWG.KHP.....FRD..DQAE...KLTHLVFAFFVVDSDG..         |
| YP_432439_H._chejuen | .RRIIGYFTSWR.TGKNGAPS...YL..ASD..IPWE...KLTHINYAFAHVDGNN..  |
| YP_529449.1_S._degra | .RRVIGYFTSWR.TGGNG.PA...YL..AHQ..IPWD...KLTHINYAFAHVDGNN..  |
| YP_077582_B._licheni | .RRIIGYFTSWR.TGKGNQDR...YL..VSD..IPWK...YLSHINYAFAHIGEDH..  |
| ChiI_S._coelicolor   | .RRVIGYFTSWR.TGKDGPKA...YL..ASD..IPWD...KITHINYAFAHVDGNN..  |
| NP_902986_C._violace | .RRIIGYFTSWR.TGKDGPSP...YL..ASD..IPWS...KLTHINYAFAHVDGSN..  |
| ZP_01159608_Photobac | .RRVIGYFTSWR.AGDDPQSS...YL..VND..IPWE...QLTHINYAFVSIADG..   |
| ZP_01234708_V._angus | .RRVIGYFTSWR.AGDDPQSS...YL..VND..IPWE...QLTHINYAFVSIADG..   |
| NP_233087_V._cholera | .RRVIGYFTSWR.SGDDPQAA...YL..VKD..IPWE...QLTHINYAFVSIADG..   |
| NP_230718_V._cholera | .RRIIGYFTSWR.TGKNGLPA...YL..AGD..LPWE...KLTHINYAFASINKSD..  |
| AAO07185_V._vulnific | .RRVIGYFTSWR.SGDDPQAA...YL..VKD..IPWE...QLTHINYAFVSIADG..   |
| ZP_01354150_C._phyto | .....DVPGD.....LLTDVNLAFGEIAP.....                          |
| ZP_01246933_F._johns | ..IIAYYTGDSQ.LI.....DQ..YEVs...KLNQIIFSFCHLK.....           |
| YP_012734_L._monocyt | .YRNVMYYGDWS.IWGG.EGN...FY..PKD..IPAD...QLTHLNFAFLDFNSN...  |
| YP_529337.1_A_S._deg | .YRVIGYYMPSLDGS.....FPPSAIGEQQ..AQMLTHINYAFIGINSQ...        |
| ChiA_A_P._kodakarae  | .YRVIVYISWG.RY...ARK...FY..VSD..IPWE...KVTHVNYAFLDLKE...    |
| AAG19274_Halobacteri | .GRVVGYYMQWA.QW...DRD...YF..PGD..IPLD...KVTHVNYAFLTVRE...   |
| AAG19275_Halobacteri | .FKVVGYYPSWKGTD...DYD...FY..PAD..VPFD...QVTDVLYAFLDVQP...   |
| CE03543_C._elegans   | .KRIVGYYRNG.NDS.....IMM..GQLA...KLTHAVFAFLELHPDG..          |
| CE34961_C._elegans   | .KRIVGYYSEWE.GTE.....ITR..SQLG...KLTHAVFAFIHMDSEG..         |
| CE20043_C._elegans   | .SRIVGFYADWE.RTD.....ITS..HQVA...KLTHAVFAYVQMKFDG..         |
| CE15845_A_C._elegans | .KRIIGLYSEFE.TMP.....ISK..KQLA...KLTHAVFRFVSMTDDG..         |
| CE32863_A_C._elegans | .KRIIGLYSEFE.TMP.....ISK..KQLA...KLTHAVFRFVSMTDDG..         |
| CE03544_C._elegans   | .RRIVGYYSEYD.STD.....ISK..NQLA...KLTHAVFAFVDIKYDG..         |
| CE08731_C._elegans   | .....                                                       |
| CE28638_C._elegans   | .KRIVGFFTDITQ.STE.....ITV..DQLS...KLTHAVFAFAKMDYLRL..       |
| CE32863_B_C._elegans | .KRTVGFFTGNS.TTS.....ITQ..DQMR...KLTHATFCRIFLNSSG..         |
| CE01673_C._elegans   | .....IFAFAQLNTNG..                                          |
| CE02993_C._elegans   | .KRIVGYFAEFE.NSG.....LTR..RHLQ...MVTHIYLFARP.TNG..          |
| CE02996_C._elegans   | .KRIVGYFAEFE.NAG.....LSR..KQLH...MLTHIYLFARP.TNG..          |
| CE02995_C._elegans   | .KRIVGYFAEFE.NTA.....LTR..KQLQ...MLTHIYLFaip.KNG..          |
| CE02992_C._elegans   | .KRIVVAYSACE.....LSN..HQLK...KLTHFIFTSISIFPNG..             |
| CE02999_C._elegans   | .KRIIGYVSSDE.GSE.....ITI..KQLE...KLTHVIFAFILVHKDG..         |
| CE02998_C._elegans   | .KRIVGYTDEW.PRK.....ISA..KQLQ...KLTHLIFTNVPNMSSG..          |
| CE09229_C._elegans   | .KRIVGYTGWG.DRE.....ITE..NQLK...KLTHVIFAFVAMYEDG..          |
| CE12928_C._elegans   | .KRIVGYTGWG.ERE.....ITE..NQLK...KLTHVIFAFVAMYADG..          |
| CE23907_C._elegans   | .KRIVGYYSATE.TSE.....ITS..SQIF...KLTHAVFAFVYMTSEG..         |
| CE32917_C._elegans   | .KKVIGYFSESH.TSE.....ITI..NHIS...KLTHAVFAFVIMKSDG..         |
| CE34579_C._elegans   | .KRIIGYYSGTS.DSE.....ITI..NQVS...KLTHAIFAFVQLTFDG..         |
| CE25073_C._elegans   | .KRIIGYFATQ.TSV.....ITR..DQVS...KLTHAVFAFVNMTSDG..          |
| CE03548_C._elegans   | .NRVVGYFSSNQ.NST.....ITE..DQVS...KLTHAVFAFVNMTQGG..         |
| NP_469498_L._innocua | .YRNVMYYGDWS.IWGG.EGN...FY..PKD..IPAD...QLTHLNFAFLDFNSN...  |
| CE08730_C._elegans   | .KRIIGYIYQKE.SSE.....IST..VGLS...RLTHAVFGSLRVQLNG..         |
| Q8U1H4_P._furiosus   | .FRVVVYISWG.IY...ARK...FF..PED..IPFE...KVTHVNYAFLNPKE...    |
| CE12474_C._elegans   | .KRRIVGYFSEIE.STE.....ISK..SQID...KLTHAVFAFVRIKYDG..        |
| CE02990_C._elegans   | .KRIVGYFAEFE.NSG.....LTR..KQLQ...MLTHIYLFaip.RNG..          |

CE40270\_C.\_elegans .KRVVGYYSRSE.TSK.....ITS..VQVS...KLTHAVFAFVYMNSDG..  
 CE40296\_C.\_elegans .KRIVGYFAEFE.NTA.....LTR..KQLR...MLTHIVFLFAFP.KNG..  
 ChiB\_S.\_marcescens .KAVIGYFIPTNQINNYTETDTSVVP.FPVSNIITPAK..AKQLTHINFSFLDINSN...  
 O10363\_O.\_pseudotsug .KTVAAYFVEWG.VYG...RG...FP..VDK..VPLP...NLSHLLYGFIPICGGDGL  
 AAP29899\_C.\_fumifera .KTVAAYFVEWG.VYG...RN...FP..VDK..VPLP...NLSHLLYGFIPICGGDGL  
 AAV73807\_B.\_mori\_NPV .KIVAAYFVEWG.VYG...RS...FP..VDK..VPLP...NLSHLLYGFIPICGGDGI  
 AAL56186\_H.\_zea\_SNPV .HTVAAYFVEWG.VYG...RS...FP..VDK..VPTP...NLSHILYGFIPICGGDGI  
 AAF33549\_S.\_exigua\_N .KIVAAYFVEWG.VYL...RQ...FP..VDK..VPAP...NLSHILYGFVPICGGDGI  
 AAZ38189\_A.\_segetum .KIVAAYFVEWG.VYP...RQ...FP..VDK..VPVP...NLSHLLYGFVPICGGEGI  
 AAS82706\_A.\_segetum .HVVAGYFVEWG.VYD...RQ...YP..ADL..VPVP...NLTHLLYGFVPLCGGDGI  
 ZP\_01159013\_Photobac .VVMGTYFVEWG.IYG...RE...YT..VDN..IPAD...NLTHILYGFIPVCGP...  
 ZP\_01161077\_Photobac .KVVGSYFVEWG.VYG...RK...FT..VDD..IPAQ...NLTHILYGFTPICGGDGI  
 ZP\_01159325\_Photobac .PVVAGYFADWQ.YNNE.ANP...YT..VKD..IPAD...KLTHVIYAFLSMCGP..H  
 ZP\_01160869\_Photobac .PVIAAAYPDWK.VYTP.KTP...YS..ANM..LPVN...DLTHIIYAFILAVCGP..I  
 ZP\_01233025\_V.\_angus .VVMGTYFVEWG.IYG...RE...YT..VDN..IPAD...NLTHILYGFIPICGP...  
 ZP\_01236284\_V.\_angus .KVVGSYFVEWG.VYG...RK...FT..VDD..IPAQ...NLTHILYGFTPICGGDGI  
 ZP\_01235109\_V.\_angus .PVVAGYFADWQ.YNNE.SNP...YT..VKD..IPAD...KLTHVIYAFLSMCGP..H  
 ZP\_01235465\_V.\_angus .PVIAAAYPDWK.VYTP.KTP...YS..ANM..LPVN...DLTHVIYAFILAVCGP..V  
 AAO08114\_V.\_vulnific .LVVGTYFVEWG.IYG...RN...YT..VDN..IPAQ...NLTHILYGFIPICGP...  
 AAO07498\_V.\_vulnific .KVVAGYFADWQ.YANA.SNP...YT..VKD..IPAE...KLTHVIYAFLSMCGP..H  
 NP\_232428\_V.\_cholera .TVIGTYFVEWS.IYD...RK...FT..VDN..IPGQ...NLTHILYGFIPICGP...  
 YP\_432951\_H.\_chejuen .TEIVTYIGDWV.IYG...RR...YD..FTK..LPVK...NLHRIVYGFSGICYPDAS  
 YP\_529337.1\_B\_S.\_deg .KIIVTYFVEWG.IYG...RD...YH..VNN..IPAS...NLTHVLFGFIAMCG....  
 YP\_435912\_H.\_chejuen .SVVGTYFVEWG.VYG...RN...FP..VEK..IPAQ...NLTHLLYAFIACVCGP...  
 ZP\_01137509\_A.\_cellu ...KVAYYDQWS.IY...LNA...FY..PKN..LDTSGIAGKLDFLIYDFENINP...  
 ChiE\_S.\_coelicolor ...KVGYFVQWG.IY...GRQ...YF..VKN..LDTSGAAKQLDVVNYAFENLDP...  
 ChiC\_S.\_coelicolor ...VKMGYFTNWG.VY...GRN...YH..VKN..LVTSGSADKITHINYAFGNVQG....  
 ChiD\_S.\_coelicolor ...KVVGYFTEWG.VY...DRN...YH..VKN..IESSGSADKLTHINYSFGNVTG....  
 NP\_903910\_C.\_violace .RHVGSYFAQWG.IY...DRN...YK..VFN..LVKSGGDKQLTFLNYAFGNVYA....  
 YP\_529072.1\_S.\_degra .DKIIGYFAEWG.VY...GRN...YH..VKN..IHTSGSADKLTHIVYAFGNVQN....  
 ZP\_01431615\_S.\_tropi .HKVVGYFAQWG.VY...ARN...YH..VKN..IHTSGSAAKLTHIMYAFGTTSG....  
 ZP\_01136287\_A.\_cellu ...VRAAAYTQWS.VY...S.G...FT..VAG..VVANGDAGRLNQINYAFINVAP....  
 01315.1\_C.\_cinereus .....AWYAG.W.HAT...TG...YP..LSR..VSWK...KYTHLTAYFAETSPDV..  
 03252.1\_C.\_cinereus .....AWYTG.W.HSR...D...FP..LSR..VSWK...KYTHMTYAFGITTPSP..  
 05285.1\_C.\_cinereus .....GWYPS.W.YKN...V...MP..PSE..IPWE...KYTELTFAFALTTPDT..  
 05291.1\_C.\_cinereus .....AWYPS.W.QAA...A...HP..PES..LSWD...KYNAMTFAFATTTSDP..  
 01586.1\_C.\_cinereus .....AAYPA.W.SAG...T...HP..PEK..LDFS...KFDILFYAFATPNSSS..  
 128098\_P.\_chrysospor .TWYTG.W.NAD...Q...LP..VDQ..VSWD...KYTSVTYAFALTQAD..  
 39872\_P.\_chrysospori .....AAYAG.W.HGV...GNSYNNFT..LDD..VAWT...KYTHLIYAFAVTDPAA..  
 138098\_P.\_chrysospor .TWYTG.W.HAQ...H...LS..LED..ISWE...KWSSISYAFAYTTPDP..  
 129436\_P.\_chrysospor .....AAYPS.Y.TAA...S...FP..PER..VDFT...RYDDWVDFAFVPAQAGG..  
 EAA71245\_G.\_zeae .....TYFAG.F.HAN...RG...FP..VSA..MPWD...KYTDKAYSFAETTEDG..  
 MGG\_04732\_M.\_grisea .....GYFAG.Y.HAK...RKG.V.TFG..VDQ..IPWD...KYDDVKYAFAEATTADG..  
 UM06190\_U.\_maydis .....GYWAD.W.TAS...T...LP..ATS..IDFS...KFDDIVNYAFALPTAEF..  
 04245\_F.\_neoformans .....GYYPD.W.SAY...Y...LS..PES..VDWD...RFDILDFAFaipnsdg..  
 16170\_R.\_oryzae .....AYVLD.W.D.....IP...KN..IKWD...KLDHIAYAFaepnang..  
 01334\_R.\_oryzae .....AYVLD.W.D.....IP...KN..IQWS...KLDHIAYAFaepdakg..  
 13934\_R.\_oryzae .....AYIVD.W.D.....LP...RT..IYWD...KLDHVSAYAFavpnkeg..  
 07611\_R.\_oryzae .....GYFPN.W.LYG...R...YT..PSK..IDFS...KYTHIYYAFaiqn.TA..  
 10252\_R.\_oryzae .....GYFPN.W.LYA...N...YP..VEN..IPYT...KYTHINYAFailnnpd..  
 14659\_R.\_oryzae .....GYYPQ.....S...FSK..IDFD...RYTHINYAFavmi.KG..  
 231399\_L.\_bicolor .....GWYEG.Y.QVN...DG...LP..LSQ..ISWY...KYTHLIYSFAETTPDV..  
 180319\_L.\_bicolor .....SWYPS.W.LGT...K...VP..PES..LSWD...KYTSVTFAFALTTSdp..  
 191848\_L.\_bicolor .....AWYPG.W.LGG...T...YA..PDT..ISWG...KYNALTFAFATTTSDA..  
 317003\_L.\_bicolor .....AAYPS.W.SAG...T...TP..PEK..LDFS...KFDILFYAFATPNSSS..  
 246840\_L.\_bicolor .....AAYTG.W.HAE...D...YP..LSD..VSWK...KYTHVIYSVASTTPNA..  
 144643\_L.\_bicolor .....GYYPD.W.AGP...R...FP..PEK..IDFD...RFDWIDFAFavpdeTF..  
 310136\_L.\_bicolor .....GWYPG.W.LGA...T...YA..PSN..ISWS...KYNALTFAFavTTNDP..  
 629882\_M.\_xanthus .....GYTGT.W.NAD...M...YP..PEK..VDFS...ALTHILVGRVTPNPd..  
 630509\_A\_M.\_xanthus .....GYFVG.Y.QLW...M...QP..VDA..VDLA...GITHLVVGRVKPNPN..  
 YP\_592598\_Acidobacte .....AAYPD.W.AKD...QTP..AYD..ASK..IPYT...KLTHILHAFLLLDPSG..  
 YP\_446903\_S.\_ruber .....GY.....VH...G.....T..VD...VSAEDARRLTHINYAFANVTE....

ZP\_00739282\_B.\_thuri .....GYFPSWG.VY...GRN...YQ..VAD..IDAS...KLTHLNIAFADICW....  
 ZP\_01245639\_F.\_johns .....GYFAQWS.IY...ARD...FN..VPK..IDGS...KLTHLNYSFYGTTY....  
 NP\_976824\_B.\_cereus .....GYFPSWG.IY...GRN...YQ..VAD..IDAS...KLTHLNIAFADICW....  
 YP\_077581\_B.\_licheni .....GYFPSWG.AY...GRD...FQ..VWD..MDVS...KVSHINYAFADICW....  
 631138\_M.\_xanthus .....GYFTAWG.IY...ARN...YH..VSN..VQPS...KLTHINYAFSNISG....  
 ZP\_01247029\_F.\_johns .....AYIPN.W.IDL..N....AF..SST..IQYS...KLTHINIAFENPDAN...  
 ZP\_01234549\_V.\_angus .....SYMKS...AND..Q....WF..DNP..HSN.....EISDLNIAFMNPSANM..  
 ZP\_01160697\_Photobac .....SYMKD...AND..Q....WF..DNP..HSN.....EISDLNIAFMNPSANM..  
 ZP\_01158584\_Photobac .....SYNKT.E.QNK...P....WV..DND..DNFG...EITDLNIAFMNPSANR..  
 AN0549\_E.\_nidulans .....GYEGWS.M.N...RP.CNAFY..PEQIPIGV.....YTHLNIAFASIDP....  
 AN8481\_E.\_nidulans .....GYEGWS.M.R...RY.CHSFY..PEQIPRGI.....YTHLNIAFASIDP....  
 AN9390\_E.\_nidulans .....GYEGWS.TSK..K..CNGLN..PEDLLMGA.....YTHLNIAFAFIDP....  
 AN0517\_E.\_nidulans .....GYEELFN.Y.Y..KG.CNVIE..PESLIIEP.....FTHLNIAFVNFGD....  
 AN0541\_E.\_nidulans .....AYYETWA.D.T...RE.CDAFR..PEDIPVKA.....LTHLNIAFAGIED....  
 AN5077\_E.\_nidulans .....GYWEGWS.T.Q...RS.CGTMS..AGEIPVNL.....LTHLNIAFGYIN....  
 AN0509\_E.\_nidulans .....AYYEGYL.FT...RE.CLYQD..ALQIDTSK.....YTHLHFGFASIT....  
 AN7613\_E.\_nidulans .....GYYESFN.LD...RP.CLNLH..AAHIKVND.....YSHIHWFVFSIN....  
 07035\_N.\_crassa .....GYEAWWS.TTN...RP.CYAML..PEQIPYGY.....YTDIIFSFATIDP....  
 07484\_N.\_crassa .....GYEAYS.LGG...RS.CLYQD..VRQIDTNK.....YSHIHFAFGDIT....  
 05317\_N.\_crassa .....AYFEAYN.LG...RD.CLFQD..ASQIDTSQ.....HTHIHFAFGTILT....  
 EAA74768\_G.\_zeae .....GYFEGWA.K.N...RA.CEVFM..PEQIPIGL.....YTHINFAFGTINP....  
 EAA78168\_G.\_zeae .....GYYGSGG.A.T...HK.CNPMI..PDAFPQGI.....YTHIYFAFGSIDP....  
 EAA75711\_G.\_zeae .....GYQSWN.VRT...RK.CDTKT..PKQLDTTG.....FTHLFYSFAFIDP....  
 EAA68447\_G.\_zeae .....GYFQGYG.MG...RP.CLYQD..ASQIDTSK.....YTHLHFAFGTILT....  
 EAA77156\_G.\_zeae .....GYFQSWN.LG...RP.CLNMD..VTKLPLT...AYTHIHFAFAGLT....  
 12510\_S.\_sclerotioru .....GYYESWA.S.S...RP.CNVFW..PEQIPIGL.....YTHINFAFGTINP....  
 00773\_S.\_sclerotioru .....GYASGG.A.T...RA.CDAML..PESFPQGI.....YSHIYFAFGSINP....  
 05454\_S.\_sclerotioru .....GYEAWN.Y.K...KK.CIGMG..IQNIPVGS.....LTHLYSFGYITP....  
 00677\_S.\_sclerotioru .....AYWQINS.AT...RS.CNALP..IPLINTQG.....LTHLIFAFMSISP....  
 02128\_S.\_sclerotioru .....GYWEGYN.FD...RP.CLNKP..ITSINTTAG...YTHVHLAFATIT....  
 MGG\_04534\_M.\_grisea .....GYEGWN.MAQ...RS.CNTMK..PSEIPLGY.....YTHIFYSFALIDP....  
 MGG\_01336\_M.\_grisea .....GYQAVA.AR...RP.CDRV...PLQINTAG.....YTHLYFSFVLIDR....  
 14527\_P.\_nodorum .....GYESWS.NTR...K..CSSVA..PEDLNLNG.....FTHINFAFAFFDP....  
 15411\_P.\_nodorum .....GYQGW.TRE...RK.CDKVA..PRQINTRG.....LTHLFYSFAFFHP....  
 02214\_P.\_nodorum .....AYQSWN.SRS...RG.CDKVM..PNQLNLSG.....ITHLVLAFAFIDP....  
 04761\_C.\_immitis .....GYEAWR.H.D...SN.CQGMG..LKDIPVNS.....LTHLFFSFGYITP....  
 04323\_A.\_capsulatum .....GYFESWV.Y.D...RP.CDVLH..PSKINTKP.....WTHLNYGFAQINP....  
 00533\_B.\_fuckeliana .....SYWQIGS.AT...RP.CNALP..VSLIPTQN.....ITHLIFAFMSISP....  
 Chi18\_1\_H.\_jecorina .....AYFEAFD.QK...RT.CLKMP..VTAVDTSA.....YTHIHFSFITLN....  
 Chi18\_8\_H.\_jecorina .....GYEAFS.YD...RD.CLAMH..PRSIPKNN.....FTHVHFAFATVT....  
 Chi18\_9\_H.\_jecorina .....GYEAFN.WE...RP.CLHME..SKLSNTDK.....YTHMHWFAGDIK....  
 Chi18\_10\_H.\_jecorina .....TYYESWN.LD...RS.CMHMD..VRTVGD LGQ...GYTHLHFAFVNIT....  
 02650\_A.\_capsulatum .....MYLTGQH.PHP...P....S...DS...SLIN...PITHVALAFMNSAL....  
 AN0221\_E.\_nidulans .....MYLTGVR.QHN...V....VP..EP...SLVS...DVTHVALAFMQSSI....  
 06020\_N.\_crassa .....MYLTG...QHP...V....AP..QI...DQLD...HVTHVALAFMSPSI....  
 EAA76014\_G.\_zeae .....MYLTG...QHD...V....VP..AK...HQFK...GVSHVVIAFMRSEF....  
 Chi18\_4\_H.\_jecorina .....MYLTG...QHV...V....MP..SED..HLID...PITHVILAFMRSDV....  
 09277\_P.\_nodorum .....MYLTG...QHN...V....VP..EYPMETMLR...GVTHVTLAFMRSDI....  
 05838\_A.\_capsulatum .....AYLDQ.W.HST...I....LP..GK...EITT...GVDCAIMAFANSSL....  
 EAA69039\_G.\_zeae .....IYYDQ.W.HTK...D....LP..SK...DITS...GVTHVMMSFANSSL....  
 MGG\_06594\_M.\_grisea .....VYYDQ.Y.HIT...P....PP..NK...TLTA...GITHVITAFQSDL....  
 Chi18\_11\_H.\_jecorina .....S....LP..DH...SVTA...GVTHVTTAFADSVI....  
 02644\_A\_P.\_nodorum .....MYADE.W.HPT...R....PT..NP...KDRS...GIDHVVI AFAMAN....  
 AN9447\_E.\_nidulans .....ANGDR.W.HVN...G....LP..GS...DQTQ...GITHAIMGFAKSTD....

.....70.....80.....90.....100.....110.....120  
 .....|.....|.....|.....|.....|.....|.....|.....|.....|.....|.....|.....|.....|  
 NP\_979924\_B.\_cereus .....  
 YP\_077302\_B.\_licheni .....  
 YP\_091539\_B.\_licheni .....  
 YP\_079121\_B.\_licheni .....  
 YP\_074366\_S.\_thermop .....



|                      |                |                       |
|----------------------|----------------|-----------------------|
| YP_075811_S._thermop | .....          |                       |
| YP_075619_S._thermop | .....          |                       |
| ZP_01354047_C._phyto | .....          |                       |
| ZP_01354926_C._phyto | .....          |                       |
| NP_902406_C._violace | .....          |                       |
| ZP_01136704_A._cellu | .....          |                       |
| ZP_00526542_S._usita | .....          |                       |
| AAF46212.1_D._melano | .....          |                       |
| AAF46534.1_D._melano | .....          |                       |
| AAF46544.1_D._melano | .....          |                       |
| At4g19720_A._thalian | .....          |                       |
| At4g19750_A._thalian | .....          |                       |
| EAA67655_G._zeae     | AKD.....G..... | TVESSDPWA...DVQRTY..  |
| EAA73155_G._zeae     | AD.....G.....  | TVYTGDSYA...DLEKHY..  |
| EAA74986_G._zeae     | PD.....G.....  | TVYTGDAYA...DLEKHY..  |
| EAA74223_G._zeae     | SDS.....G..... | EVHLTDSWA...DTDIIHW.. |
| MGG_05533_M._grisea  | A.N.....G..... | TVVSSDAWA...DTQKQF..  |
| MGG_01247_M._grisea  | TD.....G.....  | EVISSDTYS...DIDKHY..  |
| MGG_00086_M._grisea  | DD.....G.....  | TVVGGDIEA...DVSKHY..  |
| MGG_07927_M._grisea  | PDS.....G..... | EVFLTDTWA...DTDIIHW.. |
| Chi18_6_H._jecorina  | D.D.....G..... | SVVSMDPWA...DEEKML..  |
| Chi18_5_H._jecorina  | SD.....G.....  | TVVASDTYA...DVEKHY..  |
| Chi18_7_H._jecorina  | QDT.....G..... | EVHMTDGWA...DTDIIHW.. |
| 04883_N._crassa      | ED.....G.....  | TVFSSDTWS...DTDKRY..  |
| 04554_N._crassa      | PDS.....G..... | EVYLTQWA...DTDIIHW..  |
| 11407_B._fuckeliana  | TD.....G.....  | TVYLSDTYS...DLQKHY..  |
| 05350_B._fuckeliana  | PDS.....G..... | EVYMTDGWA...DTDIIHF.. |
| 11700_S._sclerotioru | TD.....G.....  | TVYLSDTYS...DLEKHY..  |
| 11304_S._sclerotioru | PES.....G..... | EVYMTDGWA...DTDIIHF.. |
| 08020_S._sclerotioru | PES.....G..... |                       |
| 01250_A._capsulatum  | PDS.....G..... | EVYLSDTYS...DLEKHY..  |
| 05886_A._capsulatum  | GDT.....G..... | EVYLTDNYA...DTDKHY..  |
| 06565_A._capsulatum  | AES.....G..... | EVFLTDTWA...DTDKHF..  |
| 05250_C._immitis     | GDT.....G..... | EVHLTDTYA...DLEKHY..  |
| 02795_C._immitis     | PS.....G.....  | EVYLSDTWA...DTDKHY..  |
| 03822_C._immitis     | PTT.....G..... | EVYLSDEQA...DIKKRF..  |
| AN5454_E._nidulans   | PET.....G..... | EVYLSDTYS...DIEKHY..  |
| AN4871_E._nidulans   | PET.....G..... | EVYLSDTWS...DIEKHY..  |
| 00269_P._nodorum     | PET.....G..... | EVYLTDTWS...DTDKHY..  |
| 04870.1_C._cinereus  | PSS.....G..... | TVSLSDVWA...DKDIHY..  |
| 09921.1_C._cinereus  | AST.....G..... | AIKLTDPYS...DEQKRF..  |
| 124149_P._chrysospor | PDS.....G..... | EVFLSDTWA...DQEIHY..  |
| 134311_P._chrysospor | PDT.....G..... | VISLTDSYA...DEQKHF..  |
| 03412_F._neoformans  | ADS.....G..... | EVVLSDTWA...DVEIHY..  |
| 13635_R._oryzae      | PD.....G.....  | QVVLGDTYA...DLEKHF..  |
| UM04261_U._maydis    | PDT.....G..... | ECFLTDLWA...DEQIHY..  |
| EAA69503_G._zeae     | AD.....G.....  | GVFLSDEWA...DAGAPV..  |
| EAA70860_G._zeae     | FK.....Q.....  | HFQAIDWA...DNEKMPV..  |
| Chi18_3_H._jecorina  | AD.....G.....  | NVLLGDEWA...DARAPV..  |
| Chi18_2_H._jecorina  | .....          | LVQWIDEHA...DVVKDI..  |
| 03026_N._crassa      | AD.....G.....  | GVFLSDEWA...DVTAPC..  |
| 01594_B._fuckeliana  | PD.....G.....  | GVFLSDEWA...DMQMPV..  |
| 05897_S._sclerotioru | PD.....G.....  | GVFLSDDWA...DMQMPV..  |
| 04742_A._capsulatum  | AR.....        | ELSNEWV...DECQPV..    |
| 04750_C._immitis     | PD.....G.....  | TVRLSDEWA...DDQMPV..  |
| 04719_P._nodorum     | DD.....G.....  | TVYLSDEWA...DAQIDV..  |
| MGG_08458_M._grisea  | KD.....G.....  | TLKHFDEYA...DLQIEA..  |
| CHT4_C._albicans     | EQT.....G..... | KLKFSDEWC...DLQMPQ..  |
| 01119_L._elongisporu | PLT.....G..... | KLKFTDEWC...DLQMPL..  |
| XP_454053_K._lactis  | AKS.....G..... | AVKSSDSWS...DFELPL..  |
| CTS2_S._cerevisiae   | SRT.....G..... | GIENTDSWS...DLEMNL..  |
| 246746_L._bicolor    | PDT.....G..... | EVFLSDVWA...DKDIHY..  |

|                      |                                                          |
|----------------------|----------------------------------------------------------|
| 03209_N._crassa      | .....VSSDTYA.....DLEKRY..                                |
| 14474_P._nodorum     | NKT.....G.....EVFLSDEWS.....DVQFPY..                     |
| CE06282_C._elegans   | .....TLLFN.....NQIE..                                    |
| CE03547_C._elegans   | .....HLQID.....GDLA..                                    |
| CE03542_C._elegans   | .....TLQFQ.....SGSA..                                    |
| CE15845_B_C._elegans | .....SLTFR.....DESS..                                    |
| CE02997_C._elegans   | .....SVKLE.....GDAA..                                    |
| CE36953_C._elegans   | .....KISVGNVNNPENAAATGL                                  |
| YP_432439_H._chejuen | .....HVSIG.ANTPTNAATGM                                   |
| YP_529449.1_S._degra | .....RISVGEEADENNPSIGM                                   |
| YP_077582_B._licheni | .....RLSVG.SDGEKNAATGM                                   |
| ChiI_S._coelicolor   | .....KLSVN.ETAPGNPATDM                                   |
| NP_902986_C._violace | .....KVNIGDISDPNSNAAVGM                                  |
| ZP_01159608_Photobac | .....KVNIGDTSDPNNAAVGM                                   |
| ZP_01234708_V._angus | .....KVNVGDVNDPNNAAVKG                                   |
| NP_233087_V._cholera | .....FSMQ.....VDDSATKM                                   |
| NP_230718_V._cholera | .....KVNVGDVNDPTNAATGK                                   |
| AAO07185_V._vulnific | .....DSTI.....QVNP....                                   |
| ZP_01354150_C._phyto | .....DGKL.....SVDS..                                     |
| ZP_01246933_F._johns | .....G.....DLV.....F.TDKDA.....AVGAPVG.                  |
| YP_012734_L._monocyt | .....LECDFI.....DVEKAD..                                 |
| YP_529337.1_A_S._deg | DG.....TVAFY.....DTYADPL.                                |
| ChiA_A_P._kodakarae  | DG.....AVDYI.....QENAMR..                                |
| AAG19274_Halobacteri | DG.....TVVLP.....DSDVDHES                                |
| AAG19275_Halobacteri | .....TIHFE.....SRKA..                                    |
| CE03543_C._elegans   | .....KLQFK.....TN.Q...                                   |
| CE34961_C._elegans   | .....SLGFK.....NDAA..                                    |
| CE20043_C._elegans   | .....QLEMS.....ER.A...                                   |
| CE15845_A_C._elegans | .....QLEMS.....ER.A...                                   |
| CE32863_A_C._elegans | .....TLQFK.....NLIT..                                    |
| CE03544_C._elegans   | .....SLILR.....KS.....                                   |
| CE08731_C._elegans   | .....ILDFE.....RSKY..                                    |
| CE28638_C._elegans   | .....SLQFE.....SAIS..                                    |
| CE32863_B_C._elegans | .....VMTLD.....GERT..                                    |
| CE01673_C._elegans   | .....VITLD.....GEQT..                                    |
| CE02993_C._elegans   | .....NMTFG.....GERS..                                    |
| CE02996_C._elegans   | .....TIKWP.....N.....                                    |
| CE02995_C._elegans   | .....TIKFK.....YG.T...                                   |
| CE02992_C._elegans   | .....HVFFE.....NLA...                                    |
| CE02999_C._elegans   | .....SVKFG.....AVSEDDS                                   |
| CE09229_C._elegans   | .....SVKFG.....PVSADDP                                   |
| CE12928_C._elegans   | .....ILTFI.....DQYE..                                    |
| CE23907_C._elegans   | .....TVMFR.....DKLA..                                    |
| CE32917_C._elegans   | .....TLVFR.....NK.....                                   |
| CE34579_C._elegans   | .....HLQID.....GDLA..                                    |
| CE25073_C._elegans   | .....NLNI.....IN.....                                    |
| CE03548_C._elegans   | .....G.....DLV.....F.TDKDA.....AVGAPVG.                  |
| NP_469498_L._innocua | .....TFEIG.....NAFS..                                    |
| CE08730_C._elegans   | DG.....TVDFY.....DTWADPQ.                                |
| Q8U1H4_P._furiosus   | .....TLQFD.....NSKA..                                    |
| CE12474_C._elegans   | .....VITIV.....DDRS..                                    |
| CE02990_C._elegans   | .....TLKFE.....KQDE..                                    |
| CE40270_C._elegans   | .....TITFG.....GESS..                                    |
| CE40296_C._elegans   | .....LECAWD.....PATNDA..                                 |
| ChiB_S._marcescens   | NDALKTIPG.....SFEALQRSCK.....GRADFKVAIHDPWA.....AIQKP... |
| O10363_O._pseudotsug | NDALKTIPG.....SFEALQRSCK.....GRSDFKVAIHDPWA.....AIQKP... |
| AAP29899_C._fumifera | NDALKTIPG.....SFEALQRSCK.....GREDFKVAIHDPWA.....AVQKP... |
| AAV73807_B._mori_NPV | NDALKTIPG.....SFEALQRSCK.....GRDNFKVSIHDPWA.....ALQKP... |
| AAL56186_H._zea_SNPV | NDALKTIPG.....SFEALQRSCK.....GRDNFKVSIHDPWA.....ALQKP... |
| AAF33549_S._exigua_N | NDALKTIPG.....SFEALQRSCK.....GRADFKVAIHDPWA.....AIQKP... |
| AAZ38189_A._segetum  | NDALKTIPG.....SFEALQRSCK.....GRADFKVSIHDPWA.....ALQKP... |

AAS82706\_A.\_segetum NDSLKQVPG...SFEALQKSCA...GREDFKVTIHDIWG...ALQKP...  
 ZP\_01159013\_Photobac NESVKS VGGN...SFNALQTACK...GVDDYEVVIHDPWA...AFQKSF...  
 ZP\_01161077\_Photobac NDSLKSIAG...SFNALQKACA...GQKDFEVS IHDPWA...AISKP...  
 ZP\_01159325\_Photobac QGAIDAVQK...QIKEACE...GKAPFS AVIVDQVS...ALQKD...  
 ZP\_01160869\_Photobac NASPDNIKK...IMKTQCK...NKPIGTAI VLDDYA...ALQMK...  
 ZP\_01233025\_V.\_angus NESVKS VGGN...SFNALQTACK...GVDDYEVVIHDPWA...AFQKSF...  
 ZP\_01236284\_V.\_angus NDSLKSIAG...SFNALQKACV...GQKDFEVS IHDPWA...AISKP...  
 ZP\_01235109\_V.\_angus QGASDAVQK...QIEAACQ...GKEPFS AVIVDQVS...ALQKD...  
 ZP\_01235465\_V.\_angus DASPDNIKK...IMKTQCK...NKPIGTAI VLDDYA...ALQIK...  
 AAO08114\_V.\_vulnific NESVKS VGGN...SFNALQTACQ...GVPDYE VVIHDPWA...AYQKSF...  
 AAO07498\_V.\_vulnific TGASET VQK...LVAKQCE...GKEPFS AI VVDTEA...ALEKD...  
 NP\_232428\_V.\_cholera NESLKS VGGN...SFNALQTACK...GVPDFE VVIHDPWA...AYQKSF...  
 YP\_432951\_H.\_chejue DTQDPGFPTS...APAAVNRTC NQ...SNLPDGA MAIADFEA...AFVRNVGV...  
 YP\_529337.1\_B.S.\_deg .DNPHASGG...AQAAIAS ECA...DKQDFE VTLVDRFA...NLEKT...  
 YP\_435912\_H.\_chejue NESLRQANPQ...GHSVLMNECS...DQADYTV TIHDRFA...ALEKS...  
 ZP\_01137509\_A.\_cellu TTL...QC FE.ATKAADQ NESNP NAGDGAGDQYA...DMDKMY...  
 ChiE.S.\_coelicolor TSL...TCQAGVT KGTSGNPQDPDEGTGAGDADA...DYARPM...  
 ChiC.S.\_coelicolor GK...CTI...GDSYA...DYDKAY...  
 ChiD.S.\_coelicolor GK...CAM...GDAYA...ATDRAY...  
 NP\_903910\_C.\_violace DG...KCGM.VTRAENGN...GDG.GDAWA...DYQRSF...  
 YP\_529072.1\_S.\_degra GE...CKI...GDSYA...AYDKAY...  
 ZP\_01431615\_S.\_tropi GR...CGI...GDSYA...DYEKAY...  
 ZP\_01136287\_A.\_cellu NPA...VSGSPIECLS...GDPWA...DYQMPF GG...  
 01315.1\_C.\_cinereus HKLSFEEAT...WTNPQ...LLP...  
 03252.1\_C.\_cinereus ...  
 05285.1\_C.\_cinereus S...ALTLE...GEEET...LR...  
 05291.1\_C.\_cinereus AN...PLALD...AESQA...LLP...  
 01586.1\_C.\_cinereus G...ITWDG...G.DKD...ILR...  
 128098\_P.\_chrysospor ...GTILLQ...DSDVA...LLP...  
 39872\_P.\_chrysospori P...ENATLA...DSDVE...LLT...  
 138098\_P.\_chrysospor ...AVVALQ...DSDAD...ILK...  
 129436\_P.\_chrysospor G...LGWDGA...DGSAGD...VLR...  
 EAA71245\_G.\_zeae G...LDLS...KSQPE...ELS...  
 MGG\_04732\_M.\_grisea S...LDLS...KSAPE...ELP...  
 UM06190\_U.\_maydis D...LWIPT...DP SGN...LLR...  
 04245\_F.\_neoformans S...LYFT...DDSST D...SLQ...  
 16170\_R.\_oryzae V...LK...GFDGN...NLK...  
 01334\_R.\_oryzae N...LK...GFESG...NLK...  
 13934\_R.\_oryzae D...LN...GFNKT...QLN...  
 07611\_R.\_oryzae S...SPTWSDSG...VFDSYVAY...GFP...  
 10252\_R.\_oryzae N...LPSFTD...DWAVES...SFP...  
 14659\_R.\_oryzae N...TPVWSD...PES IET...QLP...  
 231399\_L.\_bicolor NVLSLEKSN...PEG...LP...  
 180319\_L.\_bicolor G...AVSID...SDGLV...LLP...  
 191848\_L.\_bicolor S...VIALD...SESAS...LLP...  
 317003\_L.\_bicolor G...LSWDS...G.SQA...VLK...  
 246840\_L.\_bicolor SVVEVDVPD...DT...LLK...  
 144643\_L.\_bicolor N...LTWDNP...EESP.S...ILD...  
 310136\_L.\_bicolor S...VISLD...AQSVT...LLP...  
 629882\_M.\_xanthus .GTVNTQFDN...SNGP...AIAR...  
 630509\_A.M.\_xanthus .GTLNANFDANI...DDSHGR...AMAK...  
 YP\_592598\_Acidobacte N...GALQ...IDPEL...IEP...  
 YP\_446903\_S.\_ruber E...GRVVL...EQERDS...  
 ZP\_00739282\_B.\_thuri KGKHGN.PSTHPDNPNKQTWNCKE...SGVPLQNKEVPNGT LVLGEPWA...DVT KSY...  
 ZP\_01245639\_F.\_johns DPAH...PE...NTKLKCLDTYA...DFEHMEG...  
 NP\_976824\_B.\_cereus NGKHGN.PSTHPDNPNKQTWDCKE...SGVPLQNKEVPNGT LVLGEPWA...DVT KSY...  
 YP\_077581\_B.\_licheni EGRHGN.P...DPTGPNPQTWSCQD...ENG V...IDAPNGTIVMGDPWI...DAQSN...  
 631138\_M.\_xanthus DGR...CILGDPFA...DIDKSG...  
 ZP\_01247029\_F.\_johns ...GYLSFNS...GSN...AI...  
 ZP\_01234549\_V.\_angus DKEGIYHPDG...HVA...ALSTDK...  
 ZP\_01160697\_Photobac DEDGIYHPDG...HVA...ALSTDR...  
 ZP\_01158584\_Photobac DSEGISHPDG...IVP...SLDHEH...

|                      |       |       |    |          |    |
|----------------------|-------|-------|----|----------|----|
| AN0549_E._nidulans   | ..... | ETFE  | .. | VLVPSV   | .. |
| AN8481_E._nidulans   | ..... | ETFE  | .. | ILAPDA   | .. |
| AN9390_E._nidulans   | ..... | ESYK  | .. | IANMQD   | .. |
| AN0517_E._nidulans   | ..... | DYTL  | .. | IDEY     | .. |
| AN0541_E._nidulans   | ..... | SEIT  | .. | IDSS     | .. |
| AN5077_E._nidulans   | ..... | SAFQ  | .. | ITNMDG   | .. |
| AN0509_E._nidulans   | ..... | ENYE  | .. | VSIGD    | .. |
| AN7613_E._nidulans   | ..... | SDFQ  | .. | ISVND    | .. |
| 07035_N._crassa      | ..... | NSFE  | .. | IKPGDS   | .. |
| 07484_N._crassa      | ..... | PDFK  | .. | VSAGD    | .. |
| 05317_N._crassa      | ..... | PDYE  | .. | VEVGD    | .. |
| EAA74768_G._zeae     | ..... | FTYV  | .. | VEANDE   | .. |
| EAA78168_G._zeae     | ..... | KSEK  | .. | VQANA    | .. |
| EAA75711_G._zeae     | ..... | TSFK  | .. | ITPAHD   | .. |
| EAA68447_G._zeae     | ..... | KDFD  | .. | VEVGD    | .. |
| EAA77156_G._zeae     | ..... | SDFS  | .. | VLIEP    | .. |
| 12510_S._sclerotioru | ..... | TTFK  | .. | VEPDSE   | .. |
| 00773_S._sclerotioru | ..... | DTFE  | .. | VIPGAD   | .. |
| 05454_S._sclerotioru | ..... | DDFD  | .. | IIPMDDGN | .. |
| 00677_S._sclerotioru | ..... | NTFH  | .. | VVPFDT   | .. |
| 02128_S._sclerotioru | ..... | TDFE  | .. | VDVSS    | .. |
| MGG_04534_M._grisea  | ..... | KTFH  | .. | VADMDA   | .. |
| MGG_01336_M._grisea  | ..... | TSFA  | .. | ITPADA   | .. |
| 14527_P._nodorum     | ..... | SSFQ  | .. | IAPMDG   | .. |
| 15411_P._nodorum     | ..... | TTFE  | .. | IMPMND   | .. |
| 02214_P._nodorum     | ..... | VTYK  | .. | IGLRDT   | .. |
| 04761_C._immitis     | ..... | GDFK  | .. | IAGMDG   | .. |
| 04323_A._capsulatum  | ..... | KDNT  | .. | LTSMH    | .. |
| 00533_B._fuckeliana  | ..... | NSFH  | .. | VVPFDT   | .. |
| Chi18_1_H._jecorina  | ..... | EDYS  | .. | VNIDG    | .. |
| Chi18_8_H._jecorina  | ..... | DKFD  | .. | VDISN    | .. |
| Chi18_9_H._jecorina  | ..... | SDFS  | .. | VYIND    | .. |
| Chi18_10_H._jecorina | ..... | KDLK  | .. | VSVQ     | .. |
| 02650_A._capsulatum  | ..... | FNKVL | .. | TDPPTT   | .. |
| AN0221_E._nidulans   | ..... | FNR   | .. | NSTSS    | .. |
| 06020_N._crassa      | ..... | FN    | .. | DPLNQ    | .. |
| EAA76014_G._zeae     | ..... | FN    | .. | VDEQPD   | .. |
| Chi18_4_H._jecorina  | ..... | FN    | .. | VDETPT   | .. |
| 09277_P._nodorum     | ..... | FN    | .. | DANRT    | .. |
| 05838_A._capsulatum  | ..... | FV    | .. | ESPSG    | .. |
| EAA69039_G._zeae     | ..... | FT    | .. | TQPGG    | .. |
| MGG_06594_M._grisea  | ..... | FL    | .. | NSSG     | .. |
| Chi18_11_H._jecorina | ..... | FN    | .. | SGT      | .. |
| 02644_A_P._nodorum   | ..... | FT    | .. | ATA      | .. |
| AN9447_E._nidulans   | ..... | FT    | .. | GDAPA    | .. |

|                      | 130   | 140   | 150   | 160   | 170   | 180   |
|----------------------|-------|-------|-------|-------|-------|-------|
| NP_979924_B._cereus  | ....  | ....  | ....  | ....  | ....  | ....  |
| YP_077302_B._licheni | ..... | ..... | ..... | ..... | ..... | ..... |
| YP_091539_B._licheni | ..... | ..... | ..... | ..... | ..... | ..... |
| YP_079121_B._licheni | ..... | ..... | ..... | ..... | ..... | ..... |
| YP_074366_S._thermop | ..... | ..... | ..... | ..... | ..... | ..... |
| YP_075811_S._thermop | ..... | ..... | ..... | ..... | ..... | ..... |
| YP_075619_S._thermop | ..... | ..... | ..... | ..... | ..... | ..... |
| ZP_01354047_C._phyto | ..... | ..... | ..... | ..... | ..... | ..... |
| ZP_01354926_C._phyto | ..... | ..... | ..... | ..... | ..... | ..... |
| NP_902406_C._violace | ..... | ..... | ..... | ..... | ..... | ..... |
| ZP_01136704_A._cellu | ..... | ..... | ..... | ..... | ..... | ..... |
| ZP_00526542_S._usita | ..... | ..... | ..... | ..... | ..... | ..... |
| AAF46212.1_D._melano | ..... | ..... | ..... | ..... | ..... | ..... |
| AAF46534.1_D._melano | ..... | ..... | ..... | ..... | ..... | ..... |



[illegible]

|                      |                                                |
|----------------------|------------------------------------------------|
| YP_529449.1_S._degra | .....EWPD.....VAGAEMD.....PSFSYKG..HFNLLNKYKK  |
| YP_077582_B._licheni | .....TWPE.....HPDVKMD.....QTLPLYKG..HFNLLHQYKD |
| ChiI_S._coelicolor   | .....TWPG.....VEGAEMD.....PGLPLYKG..HFNLLNKFKK |
| NP_902986_C._violace | .....SWPG.....VAGAEMD.....ASLPLYKG..HFNLLTQYKR |
| ZP_01159608_Photobac | .....EWD.....G.VEID.....PALGFKG..HFGALATAKA    |
| ZP_01234708_V._angus | .....EWD.....G.VEID.....PALGFKG..HFGALATAKE    |
| NP_233087_V._cholera | .....EWP.....G.VEID.....PTLGFKG..HFGALATYKQ    |
| NP_230718_V._cholera | .....TWEN.....VPGAEMD.....PSLPYQG..HFNLLSKFKK  |
| AAO07185_V._vulnific | .....EWP.....G.VEID.....PTLGFKG..HFGALATYKE    |
| ZP_01354150_C._phyto | .....IKE.....LD..LPKELEILKQ                    |
| ZP_01246933_F._johns | .....AKD.....SL..TIKHLVSLKA                    |
| YP_012734_L._monocyt | .....QEG.....VQWGGAN.....AG..VLNAIQDLRA        |
| YP_529337.1_A_S._deg | .....AETQIIAELQALKN                            |
| ChiA_A_P._kodakarae  | .....NLEAMKEYKR                                |
| AAG19274_Halobacteri | .....VLEPKSWHHDH                               |
| AAG19275_Halobacteri | .....LLASFASLKQ                                |
| CE03543_C._elegans   | .....KE..SFLYLRLKLAS                           |
| CE34961_C._elegans   | .....KE..RFEKLTAVK                             |
| CE20043_C._elegans   | .....RI..RFSNLRDKVR                            |
| CE15845_A_C._elegans | .....KE..RFKDLKSKVK                            |
| CE32863_A_C._elegans | .....KE..RFKDLKSKVK                            |
| CE03544_C._elegans   | .....EQ..KFFSLKSKAR                            |
| CE08731_C._elegans   | .....P..RFEELKRVAA                             |
| CE28638_C._elegans   | .....KT..RFLAFRDAAK                            |
| CE32863_B_C._elegans | .....KQ..KFLNLRKSK                             |
| CE01673_C._elegans   | .....RR..KFQEMRSKAR                            |
| CE02993_C._elegans   | .....RR..KFEEMKSKAR                            |
| CE02996_C._elegans   | .....RR..KFEEMKNEAR                            |
| CE02995_C._elegans   | .....CE..NFESYARKAK                            |
| CE02992_C._elegans   | .....KD..GFFDMKRKSM                            |
| CE02999_C._elegans   | .....Q..R..R..RFLNLRKAQ                        |
| CE02998_C._elegans   | .....GPQ.....AAKKAER..RFLNMKKKAR               |
| CE09229_C._elegans   | .....GPQ.....AGKKAER..RFVDMKKKAR               |
| CE12928_C._elegans   | .....MD..RFSKLKEVVR                            |
| CE23907_C._elegans   | .....QE..RFLKIRDIAN                            |
| CE32917_C._elegans   | .....N..RFMALRNIK                              |
| CE34579_C._elegans   | .....KN..RFTNLIETIAK                           |
| CE25073_C._elegans   | .....RQ..RFLSLTKIAK                            |
| CE03548_C._elegans   | .....AG..VLNAIQDLRA                            |
| NP_469498_L._innocua | .....KR..KFKNWQRAVK                            |
| CE08730_C._elegans   | .....NLEKFKELKK                                |
| Q8U1H4_P._furiosus   | .....DL..RFSILKDKTR                            |
| CE12474_C._elegans   | .....LR..KFEEMKSNAR                            |
| CE02990_C._elegans   | .....ED..RFMQLKDIVN                            |
| CE40270_C._elegans   | .....SQ..KFEEMRRNVR                            |
| CE40296_C._elegans   | .....KARDVVNRLTALKA                            |
| ChiB_S._marcescens   | .....QKG.....VSAWNEP.....YKG..NFGQLMAAKL       |
| O10363_O._pseudotsug | .....QKG.....VSAWNEP.....YKG..NFGQLMAAKL       |
| AAP29899_C._fumifera | .....QKG.....VSAWNEP.....YKG..NFGQLMAAKL       |
| AAV73807_B._mori_NPV | .....QTG.....VSAWNEP.....YKG..NFGQLMAAKL       |
| AAL56186_H._zea_SNPV | .....QKG.....VSSWNEP.....YKG..NFGQLMAMKR       |
| AAF33549_S._exigua_N | .....QKG.....VSAWNEP.....YRG..NFGQLMATKL       |
| AAZ38189_A._segetum_ | .....QKG.....VGAWDDP.....YKG..NFGQLMAIKR       |
| AAS82706_A._segetum_ | .....KQA.....GHEYSTP.....IKG..NYAMLMAIKQ       |
| ZP_01159013_Photobac | .....QQG.....VSEHSDP.....YRG..NFGQLMALKK       |
| ZP_01161077_Photobac | .....F.G.....PTKAKVA.....YKG..HFAQLKDLKN       |
| ZP_01159325_Photobac | .....LNG.....KTSNKVS.....YHG..NFGQLKLLSY       |
| ZP_01160869_Photobac | .....KQA.....GHEYSTP.....IKG..NYAMLMAIKQ       |
| ZP_01233025_V._angus | .....QQG.....VSEHSDP.....YRG..NFGQLMALKK       |
| ZP_01236284_V._angus | .....F.G.....PTKAKVA.....YKG..HFAQLKDLKN       |
| ZP_01235109_V._angus | .....LKG.....KTSSKVG.....YHG..NFGQLKLLSD       |
| ZP_01235465_V._angus |                                                |

|                      |                                                |
|----------------------|------------------------------------------------|
| AAO08114_V._vulnific | .....PQA.....GHQYSTP.....IKG..NYAMMMALKQ       |
| AAO07498_V._vulnific | .....F.G.....KVSVKVP.....FKG..HFAQLAELKK       |
| NP_232428_V._cholera | .....PQA.....GHQYSSP.....IKG..NYAMLMALKK       |
| YP_432951_H._chejuen | ...PGGVTG.....TESMYELEPAS.....VGG..VFGVLYKLRLK |
| YP_529337.1_B.S._deg | .....YPG.....DTWYDDTTGQD.....YNG..NFGQLRKLKA   |
| YP_435912_H._chejuen | .....YP.....GDKWDDP.....MRG..NFGQLRRLKK        |
| ZP_01137509_A._cellu | .SADISVNGQ.....ADVWNQ.PVA.....G..NFHQQLLLKA    |
| ChiE_S._coelicolor   | .SAAQSVDBGV.....ADDGWG.KLR.....G..NLNQLKKLKA   |
| ChiC_S._coelicolor   | .TADQSVDBGV.....ADTWDQ.PLR.....G..NFNQLRKLKA   |
| ChiD_S._coelicolor   | .TAADSVDBGV.....ADTWDQ.PLR.....G..NFNQLLKLKQ   |
| NP_903910_C._violace | .AANESVDGK.....ADSWND.PLR.....G..NFNQLRKLKL    |
| YP_529072.1_S._degra | .SAADSVDBGV.....ADTWDDGVLRL.....G..NFGQLRRLKA  |
| ZP_01431615_S._tropi | .TAADSVDBGV.....ADTWDQ.PLR.....G..SFNQLRKLKA   |
| ZP_01136287_A._cellu | ATGRPSVDGT.....ADDWSG..LQ.....G..NFKQLRELKT    |
| 01315.1_C._cinereus  | .....QFVSEAH.                                  |
| 03252.1_C._cinereus  | .....AFVQEAH.                                  |
| 05285.1_C._cinereus  | .....KFVEQAH.                                  |
| 05291.1_C._cinereus  | .....RLVAAAR.                                  |
| 01586.1_C._cinereus  | .....QFVEAAH.                                  |
| 128098_P._chrysospor | .....EFVAKAK.                                  |
| 39872_P._chrysospori | .....RLVDMAH.                                  |
| 138098_P._chrysospor | .....RLVARAH.                                  |
| 129436_P._chrysospor | .....CFVNAAK.                                  |
| EAA71245_G._zeae     | .....KFVDAAH.                                  |
| MGG_04732_M._grisea  | .....GFVKAAK.                                  |
| UM06190_U._maydis    | .....RLVSSGH.                                  |
| 04245_F._neoformans  | .....SVVTQAH.                                  |
| 16170_R._oryzae      | .....SVVTQAH.                                  |
| 01334_R._oryzae      | .....QVVKEAH.                                  |
| 13934_R._oryzae      | .....KLISLAH.                                  |
| 07611_R._oryzae      | .....KLIVQMAH.                                 |
| 10252_R._oryzae      | .....QLVSAAH.                                  |
| 14659_R._oryzae      | .....QFVAEAR.                                  |
| 231399_L._bicolor    | .....KFVAQAK.                                  |
| 180319_L._bicolor    | .....TFVSAAK.                                  |
| 191848_L._bicolor    | .....RLADSAR.                                  |
| 317003_L._bicolor    | .....QFVTLAH.                                  |
| 246840_L._bicolor    | .....RLVAAAH.                                  |
| 144643_L._bicolor    | .....EFVTEAG.                                  |
| 310136_L._bicolor    | .....TLSTRAH.                                  |
| 629882_M._xanthus    | .....ALATRAH.                                  |
| 630509_A_M._xanthus  | .....ALTRNAH.                                  |
| YP_592598_Acidobacte | .....L..NLARLRDLKS                             |
| YP_446903_S._ruber   | ...PGS..GT.....TWEDCDKYA.....RCG..NFGELKRLKA   |
| ZP_00739282_B._thuri | ...GIP.....WDA.PVK.....G..NFYDLMKLKQ           |
| ZP_01245639_F._johns | ...PGS..GT.....TWEDCDKYA.....RCG..NFGELKRLKA   |
| NP_976824_B._cereus  | ...PGD.....VWDEPIR.....G..NFKQLLKLKK           |
| YP_077581_B._licheni | ...GWQ..G.....EWDPGQLR.....G..NFRAFKEMKR       |
| 631138_M._xanthus    | .....INAAHAQ.                                  |
| ZP_01247029_F._johns | .....INKLTSTIQKFRDQ.                           |
| ZP_01234549_V._angus | .....INKLTSTIRKFKDQ.                           |
| ZP_01160697_Photobac | .....EKLIVKTIQTFRDK.                           |
| ZP_01158584_Photobac | .....YEKDLMQRLTLLK.                            |
| AN0549_E._nidulans   | .....YEAKMMKRLTSLK.                            |
| AN8481_E._nidulans   | .....SDEEYMPRLTALK.                            |
| AN9390_E._nidulans   | .....DIVDRVSFLK.                               |
| AN0517_E._nidulans   | .....EMISRIVKLK.                               |
| AN0541_E._nidulans   | .....LSADVYKQVGNLK.                            |
| AN5077_E._nidulans   | .....ELISYEFNNFKYLT.                           |
| AN0509_E._nidulans   | .....TYN..QWEDFISLK.                           |
| AN7613_E._nidulans   | .....KTADYMQRISAIK.                            |
| 07035_N._crassa      |                                                |

|                      |       |         |        |       |    |
|----------------------|-------|---------|--------|-------|----|
| 07484_N._crassa      | ..... | VISTYEF | EAF    | RSMT  | .  |
| 05317_N._crassa      | ..... | VLSSYQ  | FQEF   | KRVR  | .  |
| EAA74768_G._zeae     | ..... | EGKLMY  | ERL    | IALK  | .  |
| EAA78168_G._zeae     | ..... | GDEQLY  | SQ     | LSALK | .  |
| EAA75711_G._zeae     | ..... | DDVKQM  | REFT   | DL    | S. |
| EAA68447_G._zeae     | ..... | KLSQYQ  | FKNF   | ARLT  | .  |
| EAA77156_G._zeae     | ..... | ATRE    | QFIK   | FKEV  | K. |
| 12510_S._sclerotioru | ..... | NDVGIY  | KRL    | MLLK  | .  |
| 00773_S._sclerotioru | ..... | GDEALY  | TK     | LSALQ | .  |
| 05454_S._sclerotioru | ..... | PPPEST  | LAEL   | AGMK  | .  |
| 00677_S._sclerotioru | ..... | TAVPLM  | HPFT   | LLA   | .  |
| 02128_S._sclerotioru | ..... | IQE     | AFSD   | FLSMS | .  |
| MGG_04534_M._grisea  | ..... | EVGSHY  | DAVA   | ALK   | .  |
| MGG_01336_M._grisea  | ..... | ADQALY  | SQ     | FTALK | .  |
| 14527_P._nodorum     | ..... | KTGALY  | NRFT   | GLK   | .  |
| 15411_P._nodorum     | ..... | GDIPIY  | GEFT   | SLK   | .  |
| 02214_P._nodorum     | ..... | ADDDVY  | REFL   | SLP   | .  |
| 04761_C._immitis     | ..... | LPDKLF  | SDFT   | SLK   | .  |
| 04323_A._capsulatum  | ..... | YDEKFY  | RVFT   | DLK   | .  |
| 00533_B._fuckeliana  | ..... | TAVPLM  | YPFT   | ALA   | .  |
| Chi18_1_H._jecorina  | ..... | VES     | QLRLL  | SGMA  | .  |
| Chi18_8_H._jecorina  | ..... | YDI     | EFNAWK | EG    | .  |
| Chi18_9_H._jecorina  | ..... | THH     | QWDG   | FMLK  | .  |
| Chi18_10_H._jecorina | ..... | DPRG    | QFEH   | FKGLS | .  |
| 02650_A._capsulatum  | ..... | KLFTTV  | VDKVR  | .     | .  |
| AN0221_E._nidulans   | ..... | LFTTV   | DAVR   | .     | .  |
| 06020_N._crassa      | ..... | LFTTV   | VHVR   | .     | .  |
| EAA76014_G._zeae     | ..... | MFTSV   | SDVR   | .     | .  |
| Chi18_4_H._jecorina  | ..... | LFATV   | SEVR   | .     | .  |
| 09277_P._nodorum     | ..... | LFTTV   | DEV    | R.    | .  |
| 05838_A._capsulatum  | ..... | PFPP    | ISEIR  | .     | .  |
| EAA69039_G._zeae     | ..... | PFQPL   | EKVR   | .     | .  |
| MGG_06594_M._grisea  | ..... | PFKPI   | SEIR   | .     | .  |
| Chi18_11_H._jecorina | ..... | PFMAP   | DQVR   | .     | .  |
| 02644_A_P._nodorum   | ..... | PKVP    | ISTIR  | .     | .  |
| AN9447_E._nidulans   | ..... | PFEP    | VSTFR  | .     | .  |

|                      |                                                             |      |                 |       |      |          |
|----------------------|-------------------------------------------------------------|------|-----------------|-------|------|----------|
|                      | 190                                                         | 200  | 210             | 220   | 230  | 240      |
| NP_979924_B._cereus  | .... .... .... .... .... .... .... .... .... .... .... .... | LRDA | .....           |       |      |          |
| YP_077302_B._licheni | .....                                                       | LT   | DQ              | ..... |      |          |
| YP_091539_B._licheni | .....                                                       | LN   | QP              | ..... |      |          |
| YP_079121_B._licheni | .....                                                       | LN   | QP              | ..... |      |          |
| YP_074366_S._thermop | .....                                                       | LN   | DQ              | ..... |      |          |
| YP_075811_S._thermop | .....                                                       | LN   | NP              | ..... |      |          |
| YP_075619_S._thermop | .....                                                       | LS   | DP              | ..... |      |          |
| ZP_01354047_C._phyto | .....                                                       | AQ   | NV              | ..... |      |          |
| ZP_01354926_C._phyto | .....                                                       | LS   | KT              | ..... |      |          |
| NP_902406_C._violace | .....                                                       | ST   | .....           |       |      |          |
| ZP_01136704_A._cellu | .....                                                       | LS   | NP              | ..... |      |          |
| ZP_00526542_S._usita | .....                                                       | MA   | NA              | ..... |      |          |
| AAF46212.1_D._melano | .....                                                       | VA   | NH              | ..... |      |          |
| AAF46534.1_D._melano | .....                                                       | LE   | SS              | ..... |      |          |
| AAF46544.1_D._melano | .....                                                       | VA   | SN              | ..... |      |          |
| At4g19720_A._thalian | .....                                                       | AS   | NP              | ..... |      |          |
| At4g19750_A._thalian | .....                                                       | AS   | NS              | ..... |      |          |
| EAA67655_G._zeae     | .....                                                       | KQN  | ..RNLKVLISIGGFD | ..... | GSP  | ALASGVST |
| EAA73155_G._zeae     | .....                                                       | KAN  | ..RKLKVMLSIGGWT | ..... | WSTN | FPAAAST  |
| EAA74986_G._zeae     | .....                                                       | KAH  | ..RHLKVILSIGGWT | ..... | WSTN | FPSAAGT  |
| EAA74223_G._zeae     | .....                                                       | RRN  | ..RNLKVLLSIGGWT | ..... | FSSN | FKGPAST  |
| MGG_05533_M._grisea  | .....                                                       | QAN  | ..RNVKMLLSIGGYT | ..... | WSP  | KFVPVAAD |
| MGG_01247_M._grisea  | .....                                                       | KKN  | ..RHLKVLLSIGGWT | ..... | WSPK | FAPIAAT  |



|                      |                                                             |
|----------------------|-------------------------------------------------------------|
| MGG_00086_M._grisea  | .....KAN..RHVKVLLSIGGWT.....WSTN.....FPSAASS.....           |
| MGG_07927_M._grisea  | .....KAN..RNLKVLLSIGGWT.....YSSN.....FRAPAST.....           |
| Chi18_6_H._jecorina  | .....KRH..RHKMTLLSIGGWN.....MSQSG.....KFAPVLNT.....         |
| Chi18_5_H._jecorina  | .....KAN..RNLKVMSISIGGWT.....YSTN.....FASAAST.....          |
| Chi18_7_H._jecorina  | .....KRN..RNLKVLLSIGGWT.....YSGN.....FKGPAST.....           |
| 04883_N._crassa      | .....KAN..RNVRVLLSIGGWT.....YSQTSPTS.....RFALTAST.....      |
| 04554_N._crassa      | .....RRN..RNLKVLLSIGGWT.....YSSN.....FKEPASK.....           |
| 11407_B._fuckeliana  | .....KNN..RQMKTLLSIGGWT.....YSTN.....FAAAAST.....           |
| 05350_B._fuckeliana  | .....SRN..RSLKILLSIGGWT.....YSSN.....FAQPAST.....           |
| 11700_S._sclerotioru | .....KHN..RQMKTLLSIGGWT.....YSAN.....FAAAAST.....           |
| 11304_S._sclerotioru | .....SRN..RSLKILLSIGGWT.....YSSN.....FAQPAST.....           |
| 08020_S._sclerotioru | .....KQN..RNLKVLLSIGGWT.....YSSN.....FPAAAST.....           |
| 01250_A._capsulatum  | .....KHY..RHLKTLISIGGWT.....YSAN.....FPAPAST.....           |
| 05886_A._capsulatum  | .....KQN..RNLKILLSIGGWT.....YSSN.....FPGAASST.....          |
| 06565_A._capsulatum  | .....KQN..RHLKVLLSIGGWT.....YSPH.....FGAAVST.....           |
| 05250_C._immitis     | .....KKN..RHLKILLSIGGWT.....YSSN.....FRA.AAT.....           |
| 02795_C._immitis     | .....KNN..RNLKTLISIGGWT.....YSPN.....FKTPAST.....           |
| 03822_C._immitis     | .....KRN..RNLKVLLSIGGWT.....YSEN.....FAPAAST.....           |
| AN5454_E._nidulans   | .....QQN..RHLKVLLSVGGWT.....YSKN.....FARMAAT.....           |
| AN4871_E._nidulans   | .....RQH..RQLKVLLSIGGWT.....YSPN.....FTNGAGT.....           |
| 00269_P._nodorum     | .....KKN..RKLVLLSIGGWT.....YSAN.....FAQPAST.....            |
| 04870.1_C._cinereus  | .....KKH..RHLKLLLSIGGWT.....YSPS.....IHPVULD.....           |
| 09921.1_C._cinereus  | .....MKK..RDLKVLLSIGGWT.....YSQAG.....HFNFTVN.....          |
| 124149_P._chrysospor | .....KQH..RHLKVLLSIGGWT.....YSPS.....FHPVVVN.....           |
| 134311_P._chrysospor | .....MAH..RNLKVSLSVGGWT.....YSQDG.....HFSFVTD.....          |
| 03412_F._neoformans  | .....KQN..RNLKVLLSIGGWS.....FSPN.....FAG.IVH.....           |
| 13635_R._oryzae      | .....QRH..RHLKVSLSIGGWT.....WSTH.....FGAVTRD.....           |
| UM04261_U._maydis    | .....KKN..RALKMLSVGGWT.....FGPH.....FAPMAAD.....            |
| EAA69503_G._zeae     | .....QKH..PHLRVLLSIGGG.....NSSEI.....FPVVASS.....           |
| EAA70860_G._zeae     | .....SQH..PHIKTLVSIIGGG.....SSSKE.....FPALAAAN.....         |
| Chi18_3_H._jecorina  | .....QRH..PHLQVLLSIGGS.....TASEV.....FPIVASN.....           |
| Chi18_2_H._jecorina  | .....RNH..PRLKTIVSIIGGG.....TASKE.....FPALAAAN.....         |
| 03026_N._crassa      | .....QKY..PHLQVLLSIIGGG.....ASSET.....FALVASS.....          |
| 01594_B._fuckeliana  | .....QQH..PHLQLIISIGGG.....AASQH.....FPQVAAS.....           |
| 05897_S._sclerotioru | .....QQH..EHLQLVISIGGG.....AASQN.....FAHVAAS.....           |
| 04742_A._capsulatum  | .....RD..SKVKVLLSVGGGDNGGDIVGSRN.....FAAVAAS.....           |
| 04750_C._immitis     | .....EQY..TGMKVILSIIGGG.....TGSQH.....FATVAKD.....          |
| 04719_P._nodorum     | .....RKY..TKLRVLLSVGGGG.....KGSEP.....FKGVAAD.....          |
| MGG_08458_M._grisea  | .....HQN..PHLKTIVSLIGGG.....SGSAE.....FPALATN.....          |
| CHT4_C._albicans     | .....KKN..RHLKLIMSIGGWT.....ICHL.....FESVVSAN.....          |
| 01119_L._elongisporu | .....KLN..RQLKVCMSIGGWT.....THTQ.....FEAVVQD.....           |
| XP_454053_K._lactis  | L.....ESK..HEFKTILCLGGWS.....NREA.....YKKIAKS.....          |
| CTS2_S._cerevisiae   | T.....CSD..KKFKVIMSIGGWS.....DSEN.....FKIIIKD.....          |
| 246746_L._bicolor    | .....KAN..RQLKVLLSIGGWT.....YSPS.....FHPVVVN.....           |
| 03209_N._crassa      | .....KRN..RNMKVLLSIGGWT.....YSPK.....FPPVAAT.....           |
| 14474_P._nodorum     | .....QKN..RNLKVILSVGGWT.....WRGN.....FKPALAT.....           |
| CE06282_C._elegans   | N.....GN..SKIKLMFSIGG.K.....DNSKY.....FSSVIPS.....          |
| CE03547_C._elegans   | Q.....QT..PQVKVMISIGG.N.....DNSNN.....FKPGLSS.....          |
| CE03542_C._elegans   | S.....S...TLKVMISIGG.M.....DINSN.....FSLVISD.....           |
| CE15845_B_C._elegans | S.....ANTKTLVSIIS.....ID.....WHTMAF.....                    |
| CE02997_C._elegans   | K.....ES..STLKVMSISIGG.Q.....YSSGE.....FSGLVSK.....         |
| CE36953_C._elegans   | R.....H..PDLKLLYAVGG.W.....ENSQY.....FSLTAD.....            |
| YP_432439_H._chejuen | Q.....Y..PNVKTLISVGGWA.....ETGGYFDEDGKRV.DSGGFYTMTTN.ADNSI  |
| YP_529449.1_S._degra | Q.....Y..PHVKTLISIGGWA.....ETGGYFDSNGDRV.NSGGFYTMTTN.ADGSV  |
| YP_077582_B._licheni | R.....Y..PDVKVLAAGVGGWA.....ETGGYVDKDGKRI.PSGGFYSMTTN.GDGSV |
| ChiI_S._coelicolor   | Q.....H..PDVKTMSIVGGWA.....ETGGYFADDGSRV.DSGGFYSMATK.ADGSV  |
| NP_902986_C._violace | K.....Y..PGVKTLSIVGGWA.....ETGGYFDANGKRV.ASGGFYSMTVN.ADGTV  |
| ZP_01159608_Photobac | K.....H...DVKTLISIGGWA.....ETGGHFGTDGGRA.PDGGFYTMTTN.ADGSV  |
| ZP_01234708_V._angus | K.....H...DVKTLISIGGWA.....ETGGHFGTDGGRA.ADGGFYTMTTN.ADGSV  |
| NP_233087_V._cholera | K.....Y...GVKTLISIGGWA.....ETGGHFDANGNRV.ADGGFYTMTTN.ADGSV  |
| NP_230718_V._cholera | Q.....Y..PDVKTLISVGGWA.....ETG.....GFYPMTTDLASCSTV          |
| AAO07185_V._vulnific | K.....Y...GVKTLISIGGWA.....ETGGHFGADGKRV.ADGGFYTMTTN.ADGSV  |

ZP\_01354150\_C\_phyto N.....Y..PNLRINLAIGGWG.....ADG.....FSDMAFT.....  
 ZP\_01246933\_F\_johns K.....N..PQLKIIVSLGGWG.....GCEP.....CSDAFST.....  
 YP\_012734\_L\_monocyt Q.....N..PNLKIGVSVGGWS.....KSGD.....FSTVAAD.....  
 YP\_529337.1\_A\_S\_deg .....WN..ADLKILFSVGGWAESNDAAETVSR.....YRDAF.A.....  
 ChiA\_A\_P\_kodakarae K.....Y..PAVKVLISVGGWT.....LSKY.....FSVVAAD.....  
 AAG19274\_Halobacteri TGFDDLVD..PETSFLFSIGGWN.....DSTY.....FSNAAQS.....  
 AAG19275\_Halobacteri DR.....A..ADTRLKLSIGGWG.....LSPG.....FEDAAAD.....  
 CE03543\_C\_elegans I.....LK..FDAKIMFSIGG.P.....ANTQF.....FSPIIQN.....  
 CE34961\_C\_elegans N.....AN..SDTKVMISIGG.D.....HNSEN.....FGSVLSD.....  
 CE20043\_C\_elegans RN.....ED..SNVKMMISIGG.F.....ENSQH.....FYPVLSN.....  
 CE15845\_A\_C\_elegans .....N..SMTMLMISIGG.F.....ENSNY.....FSSVLED.....  
 CE32863\_A\_C\_elegans .....N..SMTMLMISIGG.F.....ENSNY.....FSSVLED.....  
 CE03544\_C\_elegans S.....LH..SNLKMFSIGG.D.....ENSFD.....FSSALAN.....  
 CE08731\_C\_elegans .....VKKMISIGG.C.....DYSTN.....FTSVVSN.....  
 CE28638\_C\_elegans T.....SN..SGVKIMISIGG.D.....ENSQY.....FSSVLSN.....  
 CE32863\_B\_C\_elegans S.....ANTKTLVSI.....ID.....WHTMAF.....  
 CE01673\_C\_elegans H.....IN..NNVNRILSIGG.T.....NYSEK.....LSIMLQD.....  
 CE02993\_C\_elegans E.....VS..STVKVMISVGG.H.....DHSGA.....FSAIMSN.....  
 CE02996\_C\_elegans E.....AS..STLKVMISVGG.H.....DYYKE.....YSRLVSN.....  
 CE02995\_C\_elegans K.....AN..STLKVMISIGG.Q.....SNSRS.....FSRLVSN.....  
 CE02992\_C\_elegans M.....DN..PNLKIMVEING.....K.....FFSVLAE.....  
 CE02999\_C\_elegans E.....LN..RGLKVMVSIIGG.Y.....ESSPL.....FSDVLVK.....  
 CE02998\_C\_elegans L.....MN..VKVMFSIGG.H.....KNAEH.....YSTVVD.....  
 CE09229\_C\_elegans A.....AN..SGVRVLFVAVGG.W.....DNSQY.....FSSVAAD.....  
 CE12928\_C\_elegans A.....VN..SGVRVLFVAVGG.W.....DNSQY.....FSSVAAD.....  
 CE23907\_C\_elegans N.....GK..YKVKLLFSIGG.K.....DNSRN.....FSTVISS.....  
 CE32917\_C\_elegans Q.....AS..PKLKMLISIGG.P.....ANSN.....FLPVISS.....  
 CE34579\_C\_elegans T.....EN..STVKFMFSIGG.P.....GHSQN.....FSPVVRN.....  
 CE25073\_C\_elegans Q.....QT..PQVKVMISIGG.N.....DNSNN.....FKPVLSS.....  
 CE03548\_C\_elegans Q.....QT..PPVKVMISIGG.D.....DNSNN.....FYKVLNS.....  
 NP\_469498\_L\_innocua Q.....N..PNLKIGVSVGGWS.....KSGD.....FSTVAAD.....  
 CE08730\_C\_elegans N.....SS..SNVKSMISIGR.W.....DSVTQ.....LSSVLLN.....  
 Q8U1H4\_P\_furiosus K.....Y..PQVKILISVGGWT.....LSKY.....FSVIAAD.....  
 CE12474\_C\_elegans .....G..SNVEMMVSIGGGY.....ENAHY.....FASALSD.....  
 CE02990\_C\_elegans E.....AS..STLKIMISIGG.H.....YNSRS.....FSGLVFN.....  
 CE40270\_C\_elegans M.....GT..SPVKIMISIGG.K.....ENSON.....FSPVIES.....  
 CE04296\_C\_elegans K.....AS..STLKIMISIGG.Q.....YNSGE.....FSGLVSN.....  
 ChiB\_S\_marcescens .....HN..PSLRIMFSIGGWYYSNDLGVSAN.....YVNAVKT.....  
 O10363\_O\_pseudotsug A.....N..PHLKILPSIGGWT.....LSDP.....FYFMH.D.....  
 AAP29899\_C\_fumifera A.....N..PHLKILPSIGGWT.....LSDP.....FYFMH.D.....  
 AAV73807\_B\_mori\_NPV A.....N..PHLKILPSIGGWT.....LSDP.....FYFMH.D.....  
 AAL56186\_H\_zea\_SNPV A.....N..PNLKVLASIGGWT.....LSDP.....FYHMH.D.....  
 AAF33549\_S\_exigua\_N A.....N..PHIKVFASIGGWT.....LSDP.....FYHMH.D.....  
 AAZ38189\_A\_segetum\_ A.....Y..PHLKVLPSIGGWT.....LSDP.....FYHMH.E.....  
 AAS82706\_A\_segetum\_ H.....N..PDLTILPSIGGWT.....LSDP.....FFKLS.S.....  
 ZP\_01159013\_Photobac R.....N..PDLKIIPSIGGWT.....LSDP.....FFDFV.D.....  
 ZP\_01161077\_Photobac A.....H..PDLKILPSVGGWT.....LSDP.....FFFLD.D.....  
 ZP\_01159325\_Photobac E.....K..PELKILPSFGGWT.....MSEP.....FHAMAKD.....  
 ZP\_01160869\_Photobac D.....N..PNLSILPSFGGWT.....LSEP.....FHTVALN.....  
 ZP\_01233025\_V\_angus R.....N..PDLKIIPSIGGWT.....LSDP.....FFDFV.D.....  
 ZP\_01236284\_V\_angus A.....H..PDLKILPSVGGWT.....LSDP.....FFFLD.D.....  
 ZP\_01235109\_V\_angus E.....K..PELKILPSFGGWT.....MSEP.....FHAMAKD.....  
 ZP\_01235465\_V\_angus E.....N..PNLSILPSFGGWT.....LSEP.....FHTVALN.....  
 AAO08114\_V\_vulnific R.....Y..PDLKIIPSIGGWT.....LSDP.....FFDFV.D.....  
 AAO07498\_V\_vulnific Q.....H..PDLKILPSFGGWT.....MSEP.....FHAMAKD.....  
 NP\_232428\_V\_cholera T.....Y..PDLKIIPSIGGWT.....LSDP.....FFSET.D.....  
 YP\_432951\_H\_chejue E.....N..PHKLKDLVGGWT.....LSEG.....FGWMSRD.....  
 YP\_529337.1\_B\_S\_deg Q.....H..PHLKILPSIGGWT.....MSTP.....FYEMAKN.....  
 YP\_435912\_H\_chejue T.....N..PDLTILPSIGGWT.....LSDP.....FFYFAND.....  
 ZP\_01137509\_A\_cellu K.....Y..PNLKILLSIGGWT.....YSKY.....FSDAAAT.....  
 ChiE\_S\_coelicolor K.....Y..PHLKVVVSLGGWT.....YSKF.....FSDAAAT.....  
 ChiC\_S\_coelicolor K.....Y..PNIKILYSFGGWT.....WSGG.....FPDAVKN.....

|                      |                                                          |
|----------------------|----------------------------------------------------------|
| ChiD_S._coelicolor   | K.....H..PDLKILWSFGGWT.....WSGG.....FAQAAQN.....         |
| NP_903910_C._violace | A.....N..PQLKVLISLGGWT.....WSKN.....FGKFAAT.....         |
| YP_529072.1_S._degra | M.....H..PQIKIVWSFGGWT.....WSGG.....FGEAAAN.....         |
| ZP_01431615_S._tropi | M.....Y..PHLKIVWSFGGWT.....WSGG.....FTQAAQN.....         |
| ZP_01136287_A._cellu | R.....Y..PNLRITIASLGGYS.....WSGY.....FSDAALT.....        |
| 01315.1_C._cinereus  | .....KH...GVKALISIGGWT.....GSRF.....FSTAVGS.....         |
| 03252.1_C._cinereus  | .....D...NVTASLSIGGWT.....GSRF.....FSPAVGS.....          |
| 05285.1_C._cinereus  | .....AN...NVKALLSIGGWT.....GSQY.....FSPAVAS.....         |
| 05291.1_C._cinereus  | .....QH...NVKALLSLGGWT.....GSIY.....FSDHVST.....         |
| 01586.1_C._cinereus  | .....KSG.YGTKIVLSVGGWG.....GCYW.....FSQACST.....         |
| 128098_P._chrysospor | .....SH...NTRAMLTIGGWT.....GSMY.....FSPMVAT.....         |
| 39872_P._chrysospori | .....NN...SVKAMLSIGGWT.....GGRA.....FSTNVGS.....         |
| 138098_P._chrysospor | .....QN...HVDVLLTVGGWT.....GSRY.....FSTAVGS.....         |
| 129436_P._chrysospor | .....AA...GKHVKVSVGGWT.....GSAR.....FSGAVAG.....         |
| EAA71245_G._zeae     | .....KN...GVKALVSIGGWT.....GARY.....FSTNFGN.....         |
| MGG_04732_M._grisea  | .....AH...GKKAQVALGGWA.....GSIH.....FSSNVGS.....         |
| UM06190_U._maydis    | .....AG...NAKPMLSLGGWG.....GSTY.....FSPAVRT.....         |
| 04245_F._neoformans  | .....AA...GKRVKLSIGGWT.....GSAY.....FSTIVAN.....         |
| 16170_R._oryzae      | .....KN...KVGVSISIAGWS.....GSIH.....MSTLVGS.....         |
| 01334_R._oryzae      | .....KN...NVGVVISVAGWS.....GSIH.....MSTLLND.....         |
| 13934_R._oryzae      | .....HH...GKGVSLAIGGWT.....GSIY.....FSSLVRT.....         |
| 07611_R._oryzae      | .....AA...GTKVLVSIGGWS.....GSTQ.....FSTMAAS.....         |
| 10252_R._oryzae      | .....QS...KTKVLLSVGGWT.....GSKR.....FSPMVAS.....         |
| 14659_R._oryzae      | .....KK...NVKVLTSIGGWT.....GSLT.....F.....               |
| 231399_L._bicolor    | .....RH...GVKAMASVGGWT.....GSRW.....WSSNVGS.....         |
| 180319_L._bicolor    | .....SH...NVNALITIGGWT.....GSQF.....FSSNVAT.....         |
| 191848_L._bicolor    | .....SH...NVKALLSIGGWT.....GSQY.....YSSNVAT.....         |
| 317003_L._bicolor    | .....SSG.YGTKVVLISIGGWG.....GCYW.....FSQACST.....        |
| 246840_L._bicolor    | .....QN...NVKASLSIGGWT.....ASRW.....YSSNVGS.....         |
| 144643_L._bicolor    | .....AK...KSKIKLSIGGWS.....GSKY.....FSPAVRT.....         |
| 310136_L._bicolor    | .....NN...GVSALLSIGGWT.....GSLY.....FSTAVGN.....         |
| 629882_M._xanthus    | .....AA...GRKALIMVGGAG.....EHDG.....WVGAAS.....          |
| 630509_A_M._xanthus  | .....QQ...GRKALLMLGGFG.....EHEH.....FVHAAS.....          |
| YP_592598_Acidobacte | .....KA...GVKVMISIGGAD.....AEQAT.....AFATIAAS.....       |
| YP_446903_S._ruber   | A.....N..PDLKIVLSIGGWA.....WSDY.....FSDAART.....         |
| ZP_00739282_B._thuri | K.....Y..PHLKTIISVGGWT.....WSNR.....FSDMAAD.....         |
| ZP_01245639_F._johns | K.....Y..PHLKILISVGGWT.....KGQD.....LSPIAAS.....         |
| NP_976824_B._cereus  | K.....Y..PHLKTIISVGGWT.....WSNR.....FSDMAAD.....         |
| YP_077581_B._licheni | S.....H..PHLKTFISVGGWT.....WSNR.....FSDVAAD.....         |
| 631138_M._xanthus    | Q.....N..PHLKLLISVGGWS.....WSTH.....FSTVASS.....         |
| ZP_01247029_F._johns | .....N....IKVFVSLGGGS.....VSEGGAIRD.....NYFNLLIT.....    |
| ZP_01234549_V._angus | .....NP...DGRVFISFGGWR.....DSEKNESDDNIIGRDIVYEKIAAS..... |
| ZP_01160697_Photobac | .....NP...DGRVFISFGGWR.....DSEKNESDDNIIGRDIVYEKVAAS..... |
| ZP_01158584_Photobac | .....SA...NGRVFLSFGGWR.....DNESGENDDGMTGRDIVYEKIAAS..... |
| AN0549_E._nidulans   | .....KSDP.DLKVFVAVGGWS.....FN..DPG.P...TATVFSDIAGS.....  |
| AN8481_E._nidulans   | .....NLDP.DLKVFIAVGGWT.....FN..DPG.P...TATVFSDIASS.....  |
| AN9390_E._nidulans   | .....NYNP.SLEVWIAIGGWS.....MN..DPDQP...TRRTFSELAAS.....  |
| AN0517_E._nidulans   | .....FSNP.GLRVNIIVGGWA.....FS..D.A.P...TQHLWTQMARS.....  |
| AN0541_E._nidulans   | .....RRNR.SLKVFIAVGGWA.....FS..DPG.P...TRTAWSDMAST.....  |
| AN5077_E._nidulans   | .....SRNP.SLKIMIALGGWT.....FS..DPGP...WQAIFPTLAST.....   |
| AN0509_E._nidulans   | .....GP....KKVLSFGGWD.....FS...TNPR...TYNIFRQGTQP.....   |
| AN7613_E._nidulans   | .....GV....KRIASFSGGWG.....YS...INSA...SYDVLREAMFP.....  |
| 07035_N._crassa      | .....LIQP.DIRIWIIVGGWA.....FN..DPG.P...TQTTFS DIAAS..... |
| 07484_N._crassa      | .....NV....HRVISFGGWA.....FS...TDAA...TYNIFRTGVTA.....   |
| 05317_N._crassa      | .....GA....KRVVSFGGWD.....FS...TMPA...TYSIFRNGVTS.....   |
| EAA74768_G._zeae     | .....RRDR.NLKIFLAIGGWT.....FN..DPG.R...THKVFSNLVNS.....  |
| EAA78168_G._zeae     | .....TRDS.GQELWLSIGGWA.....FS..DKGSP...TATTFSDLVNAD..... |
| EAA75711_G._zeae     | .....KGGK..LQTWIAIGGFD.....MS..DEDKP...THTTWSDMVST.....  |
| EAA68447_G._zeae     | .....GV....KRILSFGGWD.....FS...ALPA...TYSIFREGVKP.....   |
| EAA77156_G._zeae     | .....GS....WKKIISFGGWA.....GS...TDAS...SFQIYRDAIKP.....  |
| 12510_S._sclerotioru | .....KKDP.GLKVFVAIGGWT.....FN..DPG.P...TATTFSDIAAS.....  |
| 00773_S._sclerotioru | .....TRDA.TQKFWSLIGGWT.....FT..DSDQA...TATTFSDLAAAD..... |

05454\_S.\_sclerotioru .....RKNP.GLKVLIALGGWT.....FN..DNGTI....WQPVFSNVVST.....  
 00677\_S.\_sclerotioru .....STT...LATYMAIGGGG.....SS....GLS.....QVWSQMVKS.....  
 02128\_S.\_sclerotioru .....GLG...FKRILSFGGWD.....FS....TDVA....TYQIFRDAMAP.....  
 MGG\_04534\_M.\_grisea .....NKQP.GLQVWIAIGGWA.....MN..DPG.P....WRTAFSDMARS.....  
 MGG\_01336\_M.\_grisea .....SKG...VQTWVAIGGGE.....FNTLDPNDPE..RYKIWSRMAAS.....  
 14527\_P.\_nodorum .....STNQ.GLKYISVGGWS.....FT..DPG.P....TRTAFSTMAGS.....  
 15411\_P.\_nodorum .....RNG...LQTWIAIGGWS.....FN..DPGTK....TYNAYSDMVST.....  
 02214\_P.\_nodorum .....DS....VSKWIGIGGFQ.....FT..DSDQP....THQTFSKMSSS.....  
 04761\_C.\_immitis .....KKNP.GLKTVIALGGWT.....FN..DP.....  
 04323\_A.\_capsulatum .....KQKP.SLKCFISIGGWD.....AG..G.....KVFSDMAKS.....  
 00533\_B.\_fuckeliana .....SAS...LATYMAIGGGG.....SS....VLP....LIWSQMVSN.....  
 Chi18\_1\_H.\_jecorina .....GV.....KRIVSVGGWD.....FS....TSPS....TYQIFRKAVSSE.....  
 Chi18\_8\_H.\_jecorina .....DY.....KKIVSFGGWD.....FS....TGSD....TFQFRQATTS.....  
 Chi18\_9\_H.\_jecorina .....NV.....KRIVSFGGWS.....FS....TGVA....SYDVLRKAMTP.....  
 Chi18\_10\_H.\_jecorina .....G.....IKRIAAFSGGWS.....FS....VGVD....TYATLRQAIPK.....  
 02650\_A.\_capsulatum .....KQFAPGTKVMIAIGGWS.....DTKG.....FSDAART.....  
 AN0221\_E.\_nidulans .....TEFSNGTSILISIGGWS.....DTQG.....FSTAART.....  
 06020\_N.\_crassa .....PRFPNHTKVLIAGGWS.....DTIG.....FSVAALN.....  
 EAA76014\_G.\_zeae .....ARVPQHTKVMVAIGGWS.....DTQG.....FEEAAKT.....  
 Chi18\_4\_H.\_jecorina .....KQFKPATKIMVAIGGWS.....DSQG.....FEAAARD.....  
 09277\_P.\_nodorum .....PKFNGTRVQVAIGGWS.....DTAG.....FEKGAKT.....  
 05838\_A.\_capsulatum .....GRFANGTKLLIAIGGWS.....DTAG.....FSACSKE.....  
 EAA69039\_G.\_zeae .....SLFDHDIKVCLAVGGWS.....DNAG.....FDEGVKT.....  
 MGG\_06594\_M.\_grisea .....GMFNNGTKVCMAIGGWS.....DNVG.....FSKAALT.....  
 Chi18\_11\_H.\_jecorina .....SLFDGTGKLCLAVGGWS.....QSAG.....FDAAAKT.....  
 02644\_A\_P.\_nodorum .....SEF.PGAKLMIAVGGWS.....DDVG.....FLQASKT.....  
 AN9447\_E.\_nidulans .....NRFSPDTKVMIAIGGWS.....DSAG.....FSAGAKD.....

|                      | 250                 | 260 | 270   | 280      | 290         | 300 |
|----------------------|---------------------|-----|-------|----------|-------------|-----|
| NP_979924_B._cereus  | ..TIQNKFITNIIQTA    | ..E | ..KY  | ..GMRDIH | ..FDFESVAP  |     |
| YP_077302_B._licheni | ..NVKNRLLDNIVAAAR   | ..  | ..RY  | ..GFKDIH | ..FDFEYLRLP |     |
| YP_091539_B._licheni | ..AVRNRLIDNIVQTIS   | ..  | ..RK  | ..GYAGVN | ..IDFEQILE  |     |
| YP_079121_B._licheni | ..AVRNRLIDNIVQTIS   | ..  | ..RK  | ..GYAGVN | ..IDFEQILE  |     |
| YP_074366_S._thermop | ..AVQDRLLGEIQRLIR   | ..  | ..EM  | ..GFRDVH | ..FDFEFLRP  |     |
| YP_075811_S._thermop | ..AAVQRAIDELVILR    | ..  | ..VQ  | ..GYAGLN | ..VDFEYVYP  |     |
| YP_075619_S._thermop | ..ARRSRAVADMLAIAR   | ..  | ..EH  | ..GLAGID | ..IDIENVPVG |     |
| ZP_01354047_C._phyto | ..EVRDHLIDELLAVVK   | ..  | ..EK  | ..QYVGVN | ..VDFEYIKA  |     |
| ZP_01354926_C._phyto | ..SSRERLINELIAQAI   | ..  | ..KY  | ..NLDGIN | ..IDFESLSV  |     |
| NP_902406_C._violace | ..SAQSQAVANLVKFAQ   | ..  | ..DK  | ..RFSGIN | ..VDFEAVAQ  |     |
| ZP_01136704_A._cellu | ..TTRTQHEQALLALAT   | ..  | ..RY  | ..GASGID | ..LDYENMAV  |     |
| ZP_00526542_S._usita | ..EARRRMNATLLAECR   | ..  | ..KY  | ..GYYGIQ | ..FDFENINY  |     |
| AAF46212.1_D._melano | ..AMRKLFRLSLREILR   | ..  | ..TYP | ..SLDGID | ..LDWEFPSA  |     |
| AAF46534.1_D._melano | ..NARIPFINSASLSVK   | ..  | ..TY  | ..GFDGLD | ..LGWQFPKN  |     |
| AAF46544.1_D._melano | ..ERRQQFIKNILKFLR   | ..  | ..QN  | ..HFDGID | ..LDWEYPAH  |     |
| At4g19720_A._thalian | ..TSRKSFISWAISSAR   | ..  | ..YY  | ..RFDGLD | ..LVWKYPKD  |     |
| At4g19750_A._thalian | ..KNRKAFIDSSIDIAR   | ..  | ..KK  | ..DFYGLD | ..LAWEYPSN  |     |
| EAA67655_G._zeae     | ..QNGRKRFISTAIKLIT  | ..  | ..DWG | ..FDGID  | ..VDWEYP..  |     |
| EAA73155_G._zeae     | ..AATRAATFAQSSVALMK | ..  | ..DWG | ..FDGID  | ..VDWEYP..  |     |
| EAA74986_G._zeae     | ..RENRIREFSKSAVTLMK | ..  | ..DWG | ..FDGID  | ..VDWEYP..  |     |
| EAA74223_G._zeae     | ..PQGRATFAKSCVDLIK  | ..  | ..NLG | ..FDGID  | ..IDWEYP..  |     |
| MGG_05533_M._grisea  | ..AGKRAAFVSSAVALMG  | ..  | ..DWG | ..MDGLD  | ..VDWEYP..  |     |
| MGG_01247_M._grisea  | ..AAGRNRFATSAVKLLA  | ..  | ..DWG | ..LDGLD  | ..IDWEYP..  |     |
| MGG_00086_M._grisea  | ..EANRNRFASTAVGLMK  | ..  | ..DWG | ..FDGLD  | ..IDWEYP..  |     |
| MGG_07927_M._grisea  | ..PEGRSHPARTAVELVR  | ..  | ..QLG | ..FDGID  | ..IDWEYP..  |     |
| Chi18_6_H._jecorina  | ..NEGRIRFAKTAVNLLA  | ..  | ..NWG | ..LDGID  | ..IDYEYP..  |     |
| Chi18_5_H._jecorina  | ..DANRKRFASTAITYMK  | ..  | ..DWG | ..FDGID  | ..IDWEYP..  |     |
| Chi18_7_H._jecorina  | ..QQGRETFAKSSLELLK  | ..  | ..NMG | ..FDGLD  | ..IDWEYP..  |     |
| 04883_N._crassa      | ..AESRTKFATSALALVK  | ..  | ..DWG | ..FDGID  | ..IDWEYP..  |     |
| 04554_N._crassa      | ..EEGRRRFAESAVELVK  | ..  | ..NLG | ..FDGLD  | ..IDWEYP..  |     |
| 11407_B._fuckeliana  | ..NATRTKFAATAVQFVQ  | ..  | ..DLG | ..FDGID  | ..IDWEYP..  |     |
| 05350_B._fuckeliana  | ..ESGRRKFAESAVDLIR  | ..  | ..NLG | ..FDGID  | ..IDWEYP..  |     |



|                      |                         |          |                  |             |
|----------------------|-------------------------|----------|------------------|-------------|
| 11700_S._sclerotioru | .EATRAREFASTAVQFVQ..... | DLG..... | FDGLD..          | IDWEYP..    |
| 11304_S._sclerotioru | .ESGRRRFAESAVDLIR.....  | NLG..... | FDGID..          | IDWEYP..    |
| 08020_S._sclerotioru | .ISKRATFASSVVSIVQ.....  | NLG..... | LDGID..          | VDWEYP..    |
| 01250_A._capsulatum  | .PTGRQTFARTAVKLLA.....  | DLG..... | FDGID..          | IDWEYP..    |
| 05886_A._capsulatum  | .AANRAHFADTATKMLL.....  | DMG..... | FDGLD..          | IDWEYP..    |
| 06565_A._capsulatum  | .PAARTKFAESATQLLL.....  | NLG..... | FDGLD..          | VDWEYP..    |
| 05250_C._immitis     | .HEGRQTFARSADVLLA.....  | DCG..... | FDGID..          | IDWEYP..    |
| 02795_C._immitis     | .EEGRKKFADTSLKLMK.....  | DLG..... | FDGID..          | IDWEYP..    |
| 03822_C._immitis     | .EAGRSMFAESAVKMLL.....  | DMG..... | MDGLD..          | VDWEYP..    |
| AN5454_E._nidulans   | .EEGRRLEFAKSAVELMG..... | DLG..... | MDGVD..          | VDWEYP..    |
| AN4871_E._nidulans   | .PENRARFAQTATKLIT.....  | DLG..... | FDGID..          | IDWEYP..    |
| 00269_P._nodorum     | .EAGRAKFASSAVALLQ.....  | DLG..... | FDGLD..          | IDWEYP..    |
| 04870.1_C._cinereus  | .PAKRAEFVKSSVALLD.....  | DYG..... | LDGLD..          | VDYEYP..    |
| 09921.1_C._cinereus  | .PTARAKFISDAVQLIE.....  | DYG..... | FDGID..          | IDYEYP..    |
| 124149_P._chrysospor | .PALRAKFVASSIRLME.....  | DHG..... | LDGLD..          | VDYEYP..    |
| 134311_P._chrysospor | .SGKRQAFVNSALQLIE.....  | DYG..... | FDGLD..          | LDFEYP..    |
| 03412_F._neoformans  | .PKWRSTFVQSAVKLVE.....  | DVG..... | LDGLD..          | IDYEYP..    |
| 13635_R._oryzae      | .PLKRQRFVNSSMKLLT.....  | DLA..... | LDGLD..          | IDWEYP..    |
| UM04261_U._maydis    | .AKKRAKFVSTAITILE.....  | NDG..... | LDGID..          | IDWEYP..    |
| EAA69503_G._zeae     | .TLLRDNFARSARGLVE.....  | ASG..... | LDGID..          | IAWEYP..    |
| EAA70860_G._zeae     | .KTARQTFARRISEFCV.....  | THQ..... | FDGVD..          | IDWEHP..    |
| Chi18_3_H._jecorina  | .TLLRDNFARSALGLVE.....  | ASG..... | LDGID..          | IAWEFP..    |
| Chi18_2_H._jecorina  | .SHARETFAKQAREFCD.....  | RHV..... | LDGID..          | IDWEHP..    |
| 03026_N._crassa      | .AILRNNFAQSARGLVE.....  | ASG..... | LDGIDTPVVDYDYP.. |             |
| 01594_B._fuckeliana  | .AATRDHFGKSVRGLVD.....  | ATG..... | FNGID..          | IDWEHP..    |
| 05897_S._sclerotioru | .AATRDHFGKSVRGLVD.....  | ATG..... | FNGID..          | IDWEHP..    |
| 04742_A._capsulatum  | .PAAVERFLSSAADLMN.....  | KFL..... | LDGLD..          | INWEHP..    |
| 04750_C._immitis     | .PIALQNFISAKNMVD.....   | RFG..... | LDGLD..          | IDWEHP..    |
| 04719_P._nodorum     | .PAKRQQFAQSALGLVQ.....  | QFG..... | IDGID..          | IDWEHP..    |
| MGG_08458_M._grisea  | .PRARDTLARATRFQVD.....  | QHG..... | FDGVD..          | IDWEQP..    |
| CHT4_C._albicans     | .DTKFDFNVNSTIEFVE.....  | KYG..... | FDGVD..          | IDWEYP..    |
| 01119_L._elongisporu | .PEKQHSFVKSVVEFVE.....  | KYH..... | FDGVD..          | IDWEYP..    |
| XP_454053_K._lactis  | .EKKVKKFIETAVDCMF.....  | RYG..... | FDGID..          | LDWEFPE..   |
| CTS2_S._cerevisiae   | .DKLLQNFVDSSVETMF.....  | RLG..... | FDGID..          | LDWEFPG..   |
| 246746_L._bicolor    | .PILRSKFVESSVQLLE.....  | DYG..... | LDGLD..          | VDYEYP..    |
| 03209_N._crassa      | .EEGRRRFASSAVKLIVQ..... | DWG..... | FDGLD..          | IDWEYP..    |
| 14474_P._nodorum     | .EAGRQKFCDSQLLIA.....   | DLG..... | LDGFD..          | IDWEYA..    |
| CE06282_C._elegans   | .EERIQTFIESILEFLE.....  | AYD..... | LDGVD..          | LFWKWPEE..  |
| CE03547_C._elegans   | .PDRKKLFINSTVSFLQ.....  | TYD..... | IDGVD..          | LYWKWPGK..  |
| CE03542_C._elegans   | .EKKRRSLIESIVSFLT.....  | EHQ..... | IDGVD..          | IFWKWSSS..  |
| CE15845_B_C._elegans | .KKRIRLLAGNITSFLK.....  | EYK..... | LDGVD..          | IQCNNWLE..  |
| CE02997_C._elegans   | .ETSRNLFTNSIVSFVQ.....  | NYD..... | IDGVD..          | IFWTWPKY..  |
| CE36953_C._elegans   | .HSRRSILISNFVKVIK.....  | EYG..... | FDGVD..          | IDWEYPTV..  |
| YP_432439_H._chejuen | NQQGINTFADSVVAFILR..... | SYG..... | FDGVD..          | IDYEYPTS..  |
| YP_529449.1_S._degra | NTAGINTFADSVVEFLR.....  | TYS..... | FDGAD..          | IDYEYPTS..  |
| YP_077582_B._licheni | NHKGIIHTFAESVVAFLR..... | KYE..... | IDGID..          | IDYEYPTS..  |
| Chi1_S._coelicolor   | NQAGIDTFADSAVDVFR.....  | KYG..... | FNGVD..          | IDYEYPTT..  |
| NP_902986_C._violace | NQAGINAFSDSAVAFILR..... | KYG..... | FDGVD..          | IDFEYPTS..  |
| ZP_01159608_Photobac | NHAGIEKFATSAVEMILR..... | KYK..... | FDGLD..          | IDYEYPTS..  |
| ZP_01234708_V._angus | NHAGIEKFATSAVEMILR..... | KYK..... | FDGLD..          | IDYEYPTS..  |
| NP_233087_V._cholera | NHAAIEKFAASAVEMIR.....  | KYK..... | FDGVD..          | IDYEYPTS..  |
| NP_230718_V._cholera | NMEGIKAFNKSVDLIR.....   | QYD..... | FDGVD..          | IDYEYPTSS.. |
| AAO07185_V._vulnific | NHAGIEKFATSAVEMIR.....  | KYK..... | FDGVD..          | IDYEYPTS..  |
| ZP_01354150_C._phyto | .KETRSVFINSIVSYLE.....  | AYD..... | LDGVD..          | IDWEYPT..   |
| ZP_01246933_F._johns | .AEGRLKFAKSVKEVSD.....  | YFK..... | VDGLD..          | LDWEYPS..   |
| YP_012734_L._monocyt | .PTKRANFVKVMKFKVK.....  | YTN..... | MDFVD..          | LDWEYPAS..  |
| YP_529337.1_A_S._deg | .PANREHFVSSCVAFMQ.....  | QHG..... | FDGID..          | IDWEYP..    |
| ChiA_A_P._kodakarae  | .PAKRQRFATTAIEILR.....  | KYN..... | LDGID..          | IDWEYPPG..  |
| AAG19274_Halobacteri | .QASRERFADTAIEIMR.....  | THN..... | FDGLD..          | IDWEYPPG..  |
| AAG19275_Halobacteri | .QASRERFATTAVDLMR.....  | TYD..... | FDGID..          | VDWEHPGP..  |
| CE03543_C._elegans   | .EEMKRKFIDSIYFLK.....   | QYK..... | LDGVD..          | LFWKWSSS..  |
| CE34961_C._elegans   | .SEKKSMFIDSIARFIR.....  | QHK..... | LDGVD..          | IYWKWLGN..  |

|                      |                                          |              |           |          |
|----------------------|------------------------------------------|--------------|-----------|----------|
| CE20043_C._elegans   | .VEMKKAFLNSISSFLA.....                   | YHE.....     | LHGVD..   | IFWKWPSP |
| CE15845_A_C._elegans | .EQKKSIFIKSILSFLI.....                   | EHK.....     | IDGVD..   | IFWKWPKL |
| CE32863_A_C._elegans | .EQKKSIFIKSILSFLI.....                   | EHK.....     | IDGVD..   | IFWKWPKL |
| CE03544_C._elegans   | .TQMKSTLITSIIAFIH.....                   | SHM.....     | IDGVD..   | LHWKWPTS |
| CE08731_C._elegans   | .QTIRRVFIESIIALLI.....                   | EHN.....     | LDGVD..   | LFWRWVPA |
| CE28638_C._elegans   | .ITMCKLFIESIIAFIH.....                   | TNS.....     | IDGMD..   | IHWKWVPE |
| CE32863_B_C._elegans | .KKRIRLLAGNITSFLK.....                   | EYK.....     | LDGVD..   | IQCNWVLE |
| CE01673_C._elegans   | .LKKTRRFIMSIIIRFLK.....                  | DNE.....     | LDGVE..   | LLWNRNT. |
| CE02993_C._elegans   | .EASRSVFIKSIVSFVK.....                   | NED.....     | IDGIE..   | IFWMPKH  |
| CE02996_C._elegans   | .ETSRNVFVKSIVSFFQ.....                   | KND.....     | IDGIE..   | IFWTRPKY |
| CE02995_C._elegans   | .ETSRNVFVNSIVSFVQ.....                   | KYD.....     | IDGIE..   | IFWTWPKY |
| CE02992_C._elegans   | .DEKKNSFIKSISFFV.....                    | DHK.....     | FDGVD..   | IFWSWP.. |
| CE02999_C._elegans   | .KKKK..LIASIALLVK.....                   | KFD.....     | LDGVD..   | IFWNWPSI |
| CE02998_C._elegans   | .STKRSVFIDSIVSFIK.....                   | SNN.....     | ASGVD..   | LFWEWPNI |
| CE09229_C._elegans   | .SGKRKKFVDSIASFVE.....                   | DQK.....     | IDGVD..   | LDWEYPDS |
| CE12928_C._elegans   | .SGKRRNFVDSVASFIE.....                   | HHK.....     | IDGVD..   | LDWEYPEM |
| CE23907_C._elegans   | .EKRIQTFIKSILDFLK.....                   | DHN.....     | LNGVD..   | LFWKWPEE |
| CE32917_C._elegans   | .PDRKKIFINSIVSFLK.....                   | KYD.....     | IDGVD..   | LFWKWPRL |
| CE34579_C._elegans   | .QEKRRFIKSIFSFLA.....                    | EHK.....     | LDGVD..   | IFWKWPHL |
| CE25073_C._elegans   | .PDRKKLFINSTVSFLQ.....                   | TYD.....     | IDGVD..   | LYWKWPGK |
| CE03548_C._elegans   | .PNRRKVFLNATTSFLQ.....                   | IYG.....     | IDGID..   | LFWKWPGG |
| NP_469498_L._innocua | .PTKRANFVKVMKFVK.....                    | YTN.....     | MDFVD..   | LDWEYPAS |
| CE08730_C._elegans   | .VKSRRMFIESIVDFLK.....                   | EHQ.....     | LDGID..   | LFWRWVPL |
| Q8U1H4_P._furiosus   | .PAKRERFARTALEIIR.....                   | KYN.....     | LDGLD..   | IDWEYPGG |
| CE12474_C._elegans   | .SQKKKNFIDSILAFIV.....                   | EHR.....     | IDGVD..   | FFCNG... |
| CE02990_C._elegans   | .ETSRNVFVNSIVSFVE.....                   | KYD.....     | IDGIE..   | MFWMWERY |
| CE40270_C._elegans   | .EYRRQIFINSILTFLK.....                   | END.....     | LDGID..   | LFWEWPCS |
| CE40296_C._elegans   | .ETSRNLVFNISIAFVR.....                   | DYD.....     | IDGVD..   | IFWTWPKH |
| ChiB_S._marcescens   | .PAARTKFAQSCVRIMK.....                   | DYG.....     | FDGVD..   | IDWEYP.. |
| O10363_O._pseudotsug | .ADKRRVFVESVKEFLQ.....                   | VWKF.....    | FDGVD..   | IDWEFPGG |
| AAP29899_C._fumifera | .AEKRRVFVDSVKEFLQ.....                   | VWKF.....    | FDGVD..   | IDWEFPGG |
| AAV73807_B._mori_NPV | .VEKRRNVFVESVKEFLQ.....                  | VWKF.....    | FDGVD..   | VDWEFPGG |
| AAL56186_H._zea_SNPV | .ARTRQIFVESVREFVL.....                   | TWKF.....    | FDGID..   | IDWEFPGG |
| AAF33549_S._exigua_N | .ADVRRVFIDSVEEFLI.....                   | TWKF.....    | YDGVH..   | IDWEFPGG |
| AAZ38189_A._segetum  | .PSVRRVFIDSVEEFLI.....                   | TWKF.....    | FDGVD..   | IDWEFPGG |
| AAS82706_A._segetum  | .AENRAVFVESAREYLR.....                   | TWKF.....    | FDGLD..   | IDWEFPGG |
| ZP_01159013_Photobac | .KANRDTFVASVEKFLK.....                   | TWKF.....    | YDGVH..   | IDWEFPGG |
| ZP_01161077_Photobac | .PAKRKVFDVSVKEFLQ.....                   | TWKF.....    | FDGVD..   | IDWEFPGG |
| ZP_01159325_Photobac | .KESIEHFSKSAVELIA.....                   | EYDF.....    | FDGID..   | LDWEYPGG |
| ZP_01160869_Photobac | .DEYRKTFVDSAIIKLIQ.....                  | KYDF.....    | FDGIQ..   | IDWEYPGG |
| ZP_01233025_V._angus | .KANRDTFVASVEKFLK.....                   | TWKF.....    | YDGVH..   | IDWEFPGG |
| ZP_01236284_V._angus | .PAKRKVFDVSVKEFLQ.....                   | TWKF.....    | FDGVD..   | IDWEFPGG |
| ZP_01235109_V._angus | .KASIEHFSKSAVELIA.....                   | QYDF.....    | FDGID..   | LDWEYPGG |
| ZP_01235465_V._angus | .DKYRKTFVDSAIIKLI.....                   | KYDF.....    | FDGIQ..   | IDWEYPGG |
| AAO08114_V._vulnific | .KKNRDTFVASVKRFLT.....                   | TWKF.....    | YDGVH..   | IDWEFPGG |
| AAO07498_V._vulnific | .PKAMAQFSKTAVELIK.....                   | QYDF.....    | FDGID..   | LDWEYPGG |
| NP_232428_V._cholera | .KAKRDVVFVASVKRFLK.....                  | TWKF.....    | YDGVH..   | IDWEYPGG |
| YP_432951_H._chejuen | .DARRKAFVDSLIIHFLQ.....                  | RFD.....     | FDGVD..   | IDWEYPAS |
| YP_529337.1_B_S._deg | .EANRAVFVESAVNFIK.....                   | KYDF.....    | FDGVD..   | IDWEYPVY |
| YP_435912_H._chejuen | .AQKRAVFVDSVDFLK.....                    | TYKF.....    | FDGVD..   | IDWEYPGG |
| ZP_01137509_A._cellu | .DASRKSFVSSCIDMFIKGNLPKDSAGFGGPGVIA..... |              | GLFDGID.. | IDWEYPAS |
| ChiE_S._coelicolor   | .PESRKKFVESCIDVWIKGNLPVY.NGAGGPGTAA..... |              | GIFDGID.. | IDWEWPGS |
| ChiC_S._coelicolor   | .PA...AFAKSCHDLVED.....                  | PRWA.....    | DVFDGID.. | LDWEYPNA |
| ChiD_S._coelicolor   | .PE...AFAQSCYDLVEN.....                  | SKWA.....    | DVFDGID.. | IDWEYPNA |
| NP_903910_C._violace | .DAGRKAMVSSCIDLYIKGNLPVG.ENAGGQAAAL..... |              | GVFDGFD.. | IDWEYPGG |
| YP_529072.1_S._degra | .AD...HFANSYDLVFD.....                   | ARWA.....    | DVFDGID.. | IDWEYPND |
| ZP_01431615_S._tropi | .PA...AFAESCYNLVED.....                  | SRWA.....    | DVFDGID.. | IDWEYPNA |
| ZP_01136287_A._cellu | .AESRAHLVASCIDLLINGNLPG.....             | LPPGAAK..... | GIFDGID.. | VDWEYPGA |
| 01315.1_C._cinereus  | .ASNRTAFVKTIVNFAQ.....                   | KY.....      | HLDGVD..  | FDWEYPGN |
| 03252.1_C._cinereus  | .ASNRTTFVNTLLDVVR.....                   | RY.....      | NLDGLD..  | FDWEYPNM |
| 05285.1_C._cinereus  | .AENRTTFVKTITDMAT.....                   | EF.....      | GLDGID..  | FDWEYPNA |
| 05291.1_C._cinereus  | .PERRTAFVKAVIDLAT.....                   | QY.....      | NLDGID..  | FDWEFPNK |

|                      |                         |                       |            |           |
|----------------------|-------------------------|-----------------------|------------|-----------|
| 01586.1_C._cinereus  | .ANNRTKFCNALMEVVN.....  | QY.....               | GLDGID..   | LDWEYPNS  |
| 128098_P._chrysospor | .ADNRTSFVNAAMQLVS.....  | QY.....               | NLDGLD..   | FDWEYPGA  |
| 39872_P._chrysospori | .AENRTAFVKTVVGLKN.....  | QF.....               | QLDGID..   | FDWEYPND  |
| 138098_P._chrysospor | .AENRTAFANALLGLVQ.....  | QY.....               | NLDGLD..   | IDWEYPNK  |
| 129436_P._chrysospor | .ADGRGALVDAIVRLYG.....  | AY.....               | ALDGID..   | IDWEYPGQ  |
| EAA71245_G._zeae     | .EKNRTAFVKTCVDFAK.....  | EH.....               | SLDGLD..   | FDWEYPNR  |
| MGG_04732_M._grisea  | .AENRTAFVKTCLDLVQ.....  | KY.....               | NLDGLD..   | FDWEYPNK  |
| UM06190_U._maydis    | .AASRATFISNIVKTYN.....  | QY.....               | GLDGID..   | LDWEYPGQ  |
| 04245_F._neoformans  | .DALRATFVSNIYDIYN.....  | QY.....               | NLDGLD..   | IDWEYPGT  |
| 16170_R._oryzae      | .VSKRNTFVRNIVNMVQ.....  | KY.....               | KLDGVN..   | IDWEFPNS  |
| 01334_R._oryzae      | .VQSRETFVKNVVMVQ.....   | KY.....               | SLDGVN..   | LDWEFPNS  |
| 13934_R._oryzae      | .EASRKSFATNLINAVE.....  | EY.....               | DLNGLN..   | IDWEYPND  |
| 07611_R._oryzae      | .QANRQAWIDWNINFIK.....  | QY.....               | NTDGVD..   | IDWEYPTS  |
| 10252_R._oryzae      | .KESRRNFINWNVFEME.....  | KY.....               | NTDGVD..   | IDWEYPCK  |
| 14659_R._oryzae      | ....R.....              | F.....                | KLDGID..   | IDWEYPGR  |
| 231399_L._bicolor    | .AENRTAFVRTLSSFFVK..... | RH.....               | NLDGLD..   | FDWEYPGR  |
| 180319_L._bicolor    | .AANRTIFVKTLTQLVT.....  | KY.....               | QLDGLD..   | FEWEYPNQ  |
| 191848_L._bicolor    | .ADSRTTFVKAVADLAT.....  | KY.....               | NLDGLD..   | FDWEYPNH  |
| 317003_L._bicolor    | .AANRTTFCNALVSAVN.....  | TY.....               | GLEGID..   | LDWEYPNS  |
| 246840_L._bicolor    | .AINRTTFVNTVTTLAK.....  | KY.....               | DLDGLD..   | FDWEYPM   |
| 144643_L._bicolor    | .LESRRVFAENILAAYN.....  | TF.....               | NLDGLD..   | LDWEYPGH  |
| 310136_L._bicolor    | .AANRSFVKAVTGAT.....    | KY.....               | NLDGLD..   | FDWEYPNR  |
| 629882_M._xanthus    | .NANRAQFVQNLLNAMD.....  | TF.....               | GYDGLD..   | IDWEYPVEQ |
| 630509_A_M._xanthus  | .EAQRAHFIRNIQLMD.....   | EL.....               | GYDGLD..   | VDWE....  |
| YP_592598_Acidobacte | .AHLRNTFAKNLHAFIV.....  | AH.....               | DYDGLD..   | IDWEVPNA  |
| YP_446903_S._ruber   | .DSSRARFARTAVDLLAK..... | .....                 | HLDGLD..   | LDWEYPGQ  |
| ZP_00739282_B._thuri | .EKTRKVFESTVAFIR.....   | AYG.....              | FDGVD..    | LDWEYPGV  |
| ZP_01245639_F._johns | .PVARAALAADMANFIV.....  | TYP.....              | FIDGFD..   | IDWEYP.L  |
| NP_976824_B._cereus  | .EKTRKVFESTVDFIR.....   | EYG.....              | FDGVD..    | LDWEYPGV  |
| YP_077581_B._licheni | .PAARENFAASAVEFIR.....  | KYG.....              | FDGVD..    | LDWEYPVS  |
| 631138_M._xanthus    | .PASRAAFVKSCVDLYIR..... | GQYPGVDPVNGEGVFDGID.. | IDWEYPVG   |           |
| ZP_01247029_F._johns | .PANRTAFIQKIYDYVV.....  | AH.....               | NFDGVD..   | VDLEGPAI  |
| ZP_01234549_V._angus | .PEYRENLINDMMDVVN.....  | TY.....               | GFDGVD..   | LDWEYPQV  |
| ZP_01160697_Photobac | .PEYRENLINDMMDVVN.....  | TY.....               | GFDGVD..   | LDWEYPQI  |
| ZP_01158584_Photobac | .PEARENFIESIMRVVN.....  | RY.....               | DLDGLD..   | LDWEYPRT  |
| AN0549_E._nidulans   | .EANQKKFFRSLVSFLS.....  | TY.....               | DFDGLD..   | LDWEYPVA  |
| AN8481_E._nidulans   | .LKNQRAFFKSLISFMS.....  | TY.....               | NFDGLD..   | LDWEYPVA  |
| AN9390_E._nidulans   | .KSHQDVFFESLLSFMD.....  | KY.....               | GFDGVD..   | IDWEYPVA  |
| AN0517_E._nidulans   | .HENRQTFINSVVKYLQ.....  | DY.....               | HLDGLD..   | IDWEYPSA  |
| AN0541_E._nidulans   | .SDNRQKFINSMLDLFE.....  | TH.....               | GLDGVD..   | LDWEYPVA  |
| AN5077_E._nidulans   | .AANRATFIQNLLGFMS.....  | EY.....               | GYDGLD..   | FDWEYPGA  |
| AN0509_E._nidulans   | ..ANRLKLATNIAKFVK.....  | DH.....               | GLDGVD..   | IDWEYPGA  |
| AN7613_E._nidulans   | ..ENVDTFIVSIMEFVA.....  | DN.....               | NLDGVD..   | FDWEYPGA  |
| 07035_N._crassa      | .SANTKFIIDSLVKLMN.....  | KY.....               | GFDGID..   | IDWEYPVA  |
| 07484_N._crassa      | ..ANRLTLATNIAFVK.....   | EK.....               | GLDGVD..   | IDWEYPGE  |
| 05317_N._crassa      | ..ANRLKMATNIAFIK.....   | EH.....               | DLDGVD..   | IDWEYPGA  |
| EAA74768_G._zeae     | .EGNQOKFLVSLMSFMA.....  | LH.....               | KFDGLD..   | LDWEYPVD  |
| EAA78168_G._zeae     | .KIRQTYFFATLTLEFMQ..... | TW.....               | GFTGLD..   | IDWEYPVD  |
| EAA75711_G._zeae     | .KANRAAFIESVRDYM.....   | EY.....               | GFQGV..... | LDWEYPGE  |
| EAA68447_G._zeae     | ..ANRLNMAKKIAAFIV.....  | KH.....               | KLDGVD..   | IDWEYPGA  |
| EAA77156_G._zeae     | ..ANRNKFAYNVMTVLN.....  | NH.....               | KLDGVD..   | FDWEYPGS  |
| 12510_S._sclerotioru | .VPRQKTFIESLISFMS.....  | TY.....               | EFDGVD..   | LDWEYPAA  |
| 00773_S._sclerotioru | .ITHQNVFFSSLTLEMT.....  | TW.....               | GFSGVD..   | IDWEYPAA  |
| 05454_S._sclerotioru | .KANRAKFISNVKSFLT.....  | RY.....               | GFDGVD..   | LDWEYPGA  |
| 00677_S._sclerotioru | .VGSRAVFIGSVEGWSL.....  | SF.....               | GFQGV..... | LDWEFPGS  |
| 02128_S._sclerotioru | ..ANSKKFAANVAAFVK.....  | KY.....               | DLDGVD..   | FDWEYPGE  |
| MGG_04534_M._grisea  | .TASQDAFFQSLVSFLA.....  | LH.....               | DFDGLD..   | LDWEYPVA  |
| MGG_01336_M._grisea  | .ATSRAQFIRSLVSFMA.....  | QY.....               | GFQGV..... | LDWEWPTD  |
| 14527_P._nodorum     | .SQNRGKFISGLMSFMN.....  | EY.....               | GFDGVD..   | LDWEYPQA  |
| 15411_P._nodorum     | .QGNRAAFVSSLIHFMD.....  | TY.....               | GFQGV..... | IDWEYPAE  |
| 02214_P._nodorum     | .KENRKAFIDSLQQFSL.....  | TY.....               | KFSGVD..   | IDWEYPGN  |
| 04761_C._immitis     | .....DNLFSEFMR.....     | QY.....               | AFDGLD..   | FDWEYPGA  |

|                      |                         |         |                   |
|----------------------|-------------------------|---------|-------------------|
| 04323_A._capsulatum  | .EDSRKSFIFSVIDFMK.....  | KY..... | GFDGVD..IDWEYPVA  |
| 00533_B._fuckeliana  | .QGNRAAFIGSVEGWLS.....  | TF..... | NFQGVLD..LDWEFPSS |
| Chi18_1_H._jecorina  | ..ENRQTLVNNIVDFLA.....  | EY..... | DLDGVD..WDWEYPDE  |
| Chi18_8_H._jecorina  | ..AYRGTFVNNLVNFMK.....  | RE..... | NIDGFD..FDWEYPGA  |
| Chi18_9_H._jecorina  | ..ENRGHFVSNVVAFAK.....  | KM..... | GIDGID..LDWEYPGA  |
| Chi18_10_H._jecorina | ..EHREFFATQVVDFLK.....  | QH..... | KLDGVD..FDWEYPGA  |
| 02650_A._capsulatum  | .VEGRKNWAANVAAMVK.....  | EM..... | GADGID..VDWEYPGG  |
| AN0221_E._nidulans   | .DESRLKFAENIRRMVD.....  | DT..... | GADGVD..IDWEYPGG  |
| 06020_N._crassa      | .DETRTLFAANVAKMVE.....  | AT..... | GADGVD..VDWEYPGG  |
| EAA76014_G._zeae     | .YFSRKRWTRQVAAAMVK..... | AT..... | EADGID..VDWEYPGG  |
| Chi18_4_H._jecorina  | .ATSRRRWAGQVKAMVD.....  | LT..... | GADGVD..IDWEYPGG  |
| 09277_P._nodorum     | .EKSRLKFASNVKAMLE.....  | AT..... | GADGID..MDWEYPGG  |
| 05838_A._capsulatum  | .DASRKQYAKNVAEMVN.....  | KH..... | GFDGVD..IDWEYPGG  |
| EAA69039_G._zeae     | .DRSRERFARNVASTLD.....  | RL..... | GFDGVD..IDWEYPGG  |
| MGG_06594_M._grisea  | .DESRLKEFAKNVAATVD..... | RL..... | GYDCVD..MDWEFPGG  |
| Chi18_11_H._jecorina | .DETRQLYAKNVADTIK.....  | NL..... | GYDCVD..IDWEYPGG  |
| 02644_A_P._nodorum   | .DAAIAQFAADVGTMLT.....  | NT..... | GADGVD..IDWEYPGG  |
| AN9447_E._nidulans   | .EASRERYAKNVAAMLE.....  | ST..... | GFDGVD..IDWEYPGG  |

|                      | 310                                                                                    | 320   | 330 | 340     | 350     | 360        |
|----------------------|----------------------------------------------------------------------------------------|-------|-----|---------|---------|------------|
| NP_979924_B._cereus  | ..... ..... ..... ..... ..... ..... ..... ..... ..... ..... ..... .....                | EDR   | EA  | YNRFLRN | VK      | TR..       |
| YP_077302_B._licheni | ..... ..... ..... ..... ..... ..... ..... ..... ..... ..... ..... .....                | EDR   | EA  | YNQFLRD | AR      | AR..       |
| YP_091539_B._licheni | ..... ..... ..... ..... ..... ..... ..... ..... ..... ..... ..... .....                | EDR   | DL  | FSGFLRL | LLK     | ER..       |
| YP_079121_B._licheni | ..... ..... ..... ..... ..... ..... ..... ..... ..... ..... ..... .....                | EDR   | DL  | FSGFLRL | LLK     | ER..       |
| YP_074366_S._thermop | ..... ..... ..... ..... ..... ..... ..... ..... ..... ..... ..... .....                | QDR   | EA  | YNRFLRR | AA      | DL..       |
| YP_075811_S._thermop | ..... ..... ..... ..... ..... ..... ..... ..... ..... ..... ..... .....                | SDR   | EA  | YNNFLRQ | LR      | PR..       |
| YP_075619_S._thermop | ..... ..... ..... ..... ..... ..... ..... ..... ..... ..... ..... .....                | DLR   | AG  | YTALAAE | AA      | AV..       |
| ZP_01354047_C._phyto | ..... ..... ..... ..... ..... ..... ..... ..... ..... ..... ..... .....                | EDR   | IG  | FAEFVAE | LT      | RR..       |
| ZP_01354926_C._phyto | ..... ..... ..... ..... ..... ..... ..... ..... ..... ..... ..... .....                | ETG   | PH  | YIQFLRE | LS      | VK..       |
| NP_902406_C._violace | ..... ..... ..... ..... ..... ..... ..... ..... ..... ..... ..... .....                | GDR   | NN  | FSHFIQV | LG      | RA..       |
| ZP_01136704_A._cellu | YANSN..... ..... ..... ..... ..... ..... ..... ..... ..... ..... ..... .....           | PALVQ | PTR | TG      | FDALVQ  | ELS..TL..  |
| ZP_00526542_S._usita | ..... ..... ..... ..... ..... ..... ..... ..... ..... ..... ..... .....                | LDR   | DL  | LASMVK  | ETS     | AA..       |
| AAF46212.1_D._melano | YD..... ..... ..... ..... ..... ..... ..... ..... ..... ..... ..... .....              | RER   | MH  | LSQLLYE | IR      | TE..       |
| AAF46534.1_D._melano | KPKKVH...GSIGKF..... ..... ..... ..... ..... ..... ..... ..... ..... ..... ..... ..... | WKG   | FKK | IF      | SGDHVV  | DEK..AE..  |
| AAF46544.1_D._melano | REG..... ..... ..... ..... ..... ..... ..... ..... ..... ..... ..... .....             | GKS   | RDR | DN      | YAQFVQ  | ELR..AE..  |
| At4g19720_A._thalian | D..... ..... ..... ..... ..... ..... ..... ..... ..... ..... ..... .....               | VEM   | RN  | FGQLLEQ | WR      | EA..       |
| At4g19750_A._thalian | D..... ..... ..... ..... ..... ..... ..... ..... ..... ..... ..... .....               | VEM   | AN  | FGKLVKE | WR      | AA..       |
| EAA67655_G._zeae     | ..... ..... ..... ..... ..... ..... ..... ..... ..... ..... ..... .....                | VNAQ  | EA  | RN      | YVLILN  | GLR..KA..  |
| EAA73155_G._zeae     | ..... ..... ..... ..... ..... ..... ..... ..... ..... ..... ..... .....                | ANDT  | DA  | NN      | MVLLLQ  | AVR..KE..  |
| EAA74986_G._zeae     | ..... ..... ..... ..... ..... ..... ..... ..... ..... ..... ..... .....                | NDEN  | EA  | TN      | FDLLLQ  | AVR..DE..  |
| EAA74223_G._zeae     | ..... ..... ..... ..... ..... ..... ..... ..... ..... ..... ..... .....                | QNAD  | EA  | RN      | YVELLG  | AVR..YE..  |
| MGG_05533_M._grisea  | ..... ..... ..... ..... ..... ..... ..... ..... ..... ..... ..... .....                | DTAE  | TN  | KN      | CVLLLQ  | ELR..RG..  |
| MGG_01247_M._grisea  | ..... ..... ..... ..... ..... ..... ..... ..... ..... ..... ..... .....                | TNKN  | EA  | DN      | YVLLLK  | ACR..EA..  |
| MGG_00086_M._grisea  | ..... ..... ..... ..... ..... ..... ..... ..... ..... ..... ..... .....                | ADAT  | QG  | QN      | MVLLLQ  | AVR..DA..  |
| MGG_07927_M._grisea  | ..... ..... ..... ..... ..... ..... ..... ..... ..... ..... ..... .....                | QNPQ  | EA  | AD      | LVALLO  | QACR..HE.. |
| Chi18_6_H._jecorina  | ..... ..... ..... ..... ..... ..... ..... ..... ..... ..... ..... .....                | INER  | EA  | VG      | FVDLLR  | ECR..KA..  |
| Chi18_5_H._jecorina  | ..... ..... ..... ..... ..... ..... ..... ..... ..... ..... ..... .....                | ADST  | QA  | SN      | MILLLE  | QACR..SQ.. |
| Chi18_7_H._jecorina  | ..... ..... ..... ..... ..... ..... ..... ..... ..... ..... ..... .....                | QNAD  | EA  | RN      | FVELLAT | VR..RE..   |
| 04883_N._crassa      | ..... ..... ..... ..... ..... ..... ..... ..... ..... ..... ..... .....                | ASET  | EA  | QN      | FLLLLK  | KEIR..SQ.. |
| 04554_N._crassa      | ..... ..... ..... ..... ..... ..... ..... ..... ..... ..... ..... .....                | QNAQ  | EA  | SD      | FVSLLS  | ACR..SA..  |
| 11407_B._fuckeliana  | ..... ..... ..... ..... ..... ..... ..... ..... ..... ..... ..... .....                | ANDV  | EA  | GN      | FVLLLQ  | AVR..SA..  |
| 05350_B._fuckeliana  | ..... ..... ..... ..... ..... ..... ..... ..... ..... ..... ..... .....                | KNAE  | EA  | RD      | YVLLLR  | ECR..EA..  |
| 11700_S._sclerotioru | ..... ..... ..... ..... ..... ..... ..... ..... ..... ..... ..... .....                | ANDV  | EA  | AN      | FVLLLK  | AIR..SA..  |
| 11304_S._sclerotioru | ..... ..... ..... ..... ..... ..... ..... ..... ..... ..... ..... .....                | KNTD  | EA  | RD      | YVLLLR  | ECR..EA..  |
| 08020_S._sclerotioru | ..... ..... ..... ..... ..... ..... ..... ..... ..... ..... ..... .....                | SDDT  | EA  | ND      | FVLLLQ  | QACR..DA.. |
| 01250_A._capsulatum  | ..... ..... ..... ..... ..... ..... ..... ..... ..... ..... ..... .....                | QDDA  | QA  | HN      | FVLLLQ  | ETR..LA..  |
| 05886_A._capsulatum  | ..... ..... ..... ..... ..... ..... ..... ..... ..... ..... ..... .....                | NDDE  | EA  | KN      | FVELLK  | VTR..EK..  |
| 06565_A._capsulatum  | ..... ..... ..... ..... ..... ..... ..... ..... ..... ..... ..... .....                | KDDE  | EA  | KN      | LVELLK  | TTR..EV..  |
| 05250_C._immitis     | ..... ..... ..... ..... ..... ..... ..... ..... ..... ..... ..... .....                | QNDT  | EA  | LN      | FVYLLY  | ETR..MA..  |
| 02795_C._immitis     | ..... ..... ..... ..... ..... ..... ..... ..... ..... ..... ..... .....                | EDEK  | QA  | ND      | FVLLLK  | ACR..EA..  |
| 03822_C._immitis     | ..... ..... ..... ..... ..... ..... ..... ..... ..... ..... ..... .....                | KDDK  | EA  | QD      | FAALLK  | AVR..QK..  |



|                      |                |            |                           |     |       |                  |             |      |    |
|----------------------|----------------|------------|---------------------------|-----|-------|------------------|-------------|------|----|
| AN5454_E._nidulans   | .....          | ENDD       | QA                        | SD  | ..... | FVELLRETR        | EE          | ..   |    |
| AN4871_E._nidulans   | .....          | QNDQ       | QA                        | QN  | ..... | YVDLLRRCR        | EA          | ..   |    |
| 00269_P._nodorum     | .....          | ANEA       | QA                        | ND  | ..... | MVSLLAATR        | KA          | ..   |    |
| 04870.1_C._cinereus  | .....          | QNAE       | QA                        | RG  | ..... | YVDLLRELR        | EA          | ..   |    |
| 09921.1_C._cinereus  | .....          | STPE       | QG                        | QG  | ..... | LADLVTS LR       | TA          | ..   |    |
| 124149_P._chrysospor | .....          | SNEA       | QA                        | RG  | ..... | YVELLREMR        | LA          | ..   |    |
| 134311_P._chrysospor | .....          | SSTA       | QG                        | QG  | ..... | FADLITS LR       | SA          | ..   |    |
| 03412_F._neoformans  | .....          | KTPR       | DA                        | EA  | ..... | YVDLLRELR        | QG          | ..   |    |
| 13635_R._oryzae      | .....          | KDDE       | EA                        | FY  | ..... | YVHLLYELR        | LA          | ..   |    |
| UM04261_U._maydis    | .....          | SDST       | QA                        | AN  | ..... | FVLLLKELR        | AG          | ..   |    |
| EAA69503_G._zeae     | .....          | CDAQ       | QG                        | YD  | ..... | FLALLAAVR        | IH          | ..   |    |
| EAA70860_G._zeae     | .....          | QTPE       | AG                        | RN  | ..... | YVFLQDIR         | NV          | ..   |    |
| Chi18_3_H._jecorina  | .....          | SEAR       | HG                        | QD  | ..... | FLALLAAVR        | IH          | ..   |    |
| Chi18_2_H._jecorina  | .....          | SNAE       | QG                        | RD  | ..... | YVKLLKECR        | RA          | ..   |    |
| 03026_N._crassa      | .....          | CSPQ       | QG                        | SD  | ..... | FVSLAAVR         | VH          | ..   |    |
| 01594_B._fuckeliana  | .....          | SDPE       | QG                        | RN  | ..... | FLALLAIR         | IH          | ..   |    |
| 05897_S._sclerotioru | .....          | SDPE       | QG                        | RN  | ..... | FLALLAIR         | LH          | ..   |    |
| 04742_A._capsulatum  | .....          | ETLE       | QG                        | YD  | ..... | YNTLLYRLR        | EQ          | ..   |    |
| 04750_C._immitis     | .....          | SDSQ       | QG                        | ED  | ..... | YVNLLRLLR        | EG          | ..   |    |
| 04719_P._nodorum     | .....          | SDSK       | QG                        | QD  | ..... | FIALLADLR        | QF          | ..   |    |
| MGG_08458_M._grisea  | .....          | SNTN       | EG                        | EA  | ..... | YVALLTALR        | QA          | ..   |    |
| CHT4_C._albicans     | .....          | KNST       | QA                        | AK  | ..... | LVELLARLR        | NK          | ..   |    |
| 01119_L._elongisporu | .....          | KNLS       | QG                        | KA  | ..... | LANLLKVL R       | HA          | ..   |    |
| XP_454053_K._lactis  | .....          | EDSN       | EP                        | IV  | ..... | YLEMMRGIR        | EG          | ..   |    |
| CTS2_S._cerevisiae   | .....          | NNES       | EP                        | RG  | ..... | YKLVRMLR         | LK          | ..   |    |
| 246746_L._bicolor    | .....          | SNDA       | QA                        | LG  | ..... | YVELLKEMR        | AA          | ..   |    |
| 03209_N._crassa      | .....          | TNAR       | EA                        | QD  | ..... | FVLLLRCR         | QA          | ..   |    |
| 14474_P._nodorum     | .....          | EDAT       | DA                        | AN  | ..... | FLDTVMRCRKL TNQA | ..          |      |    |
| CE06282_C._elegans   | .....          | E          | YRD                       |     | ..... | AYFAFINQLR       | KT          | ..   |    |
| CE03547_C._elegans   | .....          | T          | SKD                       |     | ..... | IYSQFINDLR       | YS          | ..   |    |
| CE03542_C._elegans   | .....          | R          | DKF                       |     | ..... | NFSVFMRDLR       | EK          | ..   |    |
| CE15845_B_C._elegans | .....          | S          | NQH                       |     | ..... | MVSEFLSEL R      | QA          | ..   |    |
| CE02997_C._elegans   | .....          | S          | DEN                       |     | ..... | NYLMFIRELR       | YAFT        | ..   |    |
| CE36953_C._elegans   | GGAVE          | GTPA       | DRR                       |     | ..... | NYVNL MREL R     | NELR        | ..   |    |
| YP_432439_H._chejuen | MNDA           | GNPD       | DFAIANARRAGLMASYVELMKT LR |     | ..... |                  | EK          | ..   |    |
| YP_529449.1_S._degra | MNDA           | GNPS       | DFAIANARRKGLNASYNVLMKT LR |     | ..... |                  | QK          | ..   |    |
| YP_077582_B._licheni | MQDA           | GNPA       | DWNIANPRRGNLKSFEALMKT LR  |     | ..... |                  | EK          | ..   |    |
| ChiI_S._coelicolor   | MKDA           | GNPL       | DWSFANGRRAGLVKGAAALMKT LR |     | ..... |                  | EK          | ..   |    |
| NP_902986_C._violace | MNNA           | GNPL       | DWTFSNARLGSLNKGYVALLQT LR |     | ..... |                  | DR          | ..   |    |
| ZP_01159608_Photobac | MAGA           | GNPY       | DKEFMETRRPYLWASYQELMKVL R |     | ..... |                  | EK          | ..   |    |
| ZP_01234708_V._angus | MAGA           | GNPY       | DKEFMETRRPYLWASYQELMKVL R |     | ..... |                  | EK          | ..   |    |
| NP_233087_V._cholera | MAGA           | GNPD       | DKGFMEPRRAYLWASYQELMRVL R |     | ..... |                  | EK          | ..   |    |
| NP_230718_V._cholera | MKDS           | GNPV       | DFEQSNKCRGQLWDNYMVMMT ELR |     | ..... |                  | KA          | ..   |    |
| AAO07185_V._vulnific | MAGA           | GNPD       | DKAFMEPRRAYLWASYQELMRVL R |     | ..... |                  | EK          | ..   |    |
| ZP_01354150_C._phyto |                | RDHS       | GLIKARPEDT                | EN  | ..... | FILLMKEIR        | SK          | ..   |    |
| ZP_01246933_F._johns |                | IEGL       | PGHLYQAADK                | PN  | ..... | FTELVKILR        | S           | ..   |    |
| YP_012734_L._monocyt | VRDADLV DNKNDE | GTPNAKPADK |                           | QN  | ..... | FITLLQDLR        | TA          | ..   |    |
| YP_529337.1_A_S._deg |                |            | RAED                      | VDN | ..... | FIAGLAAMR        | NQ          | ..   |    |
| ChiA_A_P._kodakarae  |                | GGMAGNY    | ESPD                      | DG  | KN    | .....            | FVLLKDLR    | EA   | .. |
| AAG19274_Halobacteri |                | GGNSGNV    | VRDG                      | DK  | QR    | .....            | YTELLQTVR   | EK   | .. |
| AAG19275_Halobacteri |                | RRGKCEC    | GSAQ                      | GP  | AN    | .....            | HVALLETVR   | DR   | .. |
| CE03543_C._elegans   |                |            | G                         | DKF |       | .....            | TYSSFLQELK  | HK   | .. |
| CE34961_C._elegans   |                |            | SET                       | EHH |       | .....            | DFPSFLKDLK  | EK   | .. |
| CE20043_C._elegans   |                |            | E                         | DKA |       | .....            | HYSRFLADLR  | QH   | .. |
| CE15845_A_C._elegans |                |            | G                         | NRA |       | .....            | SYSKFLREL N | QK   | .. |
| CE32863_A_C._elegans |                |            | G                         | NRA |       | .....            | SYSKFLREL N | QK   | .. |
| CE03544_C._elegans   |                |            | R                         | DKS |       | .....            | NYATLIREIR  | EK   | .. |
| CE08731_C._elegans   |                |            | A                         | LQS |       | .....            | EFCSFLKELK  | NE   | .. |
| CE28638_C._elegans   |                |            | T                         | KED |       | .....            | VYVSFLRN LH | KA   | .. |
| CE32863_B_C._elegans |                |            | S                         | NQH |       | .....            | MVSEFLSEL R | QA   | .. |
| CE01673_C._elegans   |                |            |                           | EET |       | .....            | LYCELLQHLK  | MG   | .. |
| CE02993_C._elegans   |                |            | R                         | DVN |       | .....            | NYSIFIQDLR  | NEFT | .. |

|                      |                                                              |
|----------------------|--------------------------------------------------------------|
| CE02996_C._elegans   | .....E.....DIK.....SYSSFIQELR.....SAFT                       |
| CE02995_C._elegans   | .....E.....DAN.....NYLIFIQELR.....YAFI                       |
| CE02992_C._elegans   | .....E.....DED.....TFHLFIKEFR.....E                          |
| CE02999_C._elegans   | .....T.....DQS.....NYLIFIRELR.....KKLT                       |
| CE02998_C._elegans   | .....S.....EMN.....DFITTIKELR.....KKLA                       |
| CE09229_C._elegans   | .....NGK.....DAK.....NHVQLIKEIR.....EKFS                     |
| CE12928_C._elegans   | .....KGG.....DKQ.....NHVTLIRELR.....ERFN                     |
| CE23907_C._elegans   | .....K.....EKM.....KYSKFIQRLK.....K...                       |
| CE32917_C._elegans   | .....E.....DKY.....YYSRFISMLK.....ER..                       |
| CE34579_C._elegans   | .....A.....DKH.....AYSQFLLLELN.....EI..                      |
| CE25073_C._elegans   | .....T.....SKD.....IYSQFINDLR.....YS..                       |
| CE03548_C._elegans   | .....A.....SKT.....LYTKFISDLR.....HN..                       |
| NP_469498_L._innocua | VRDADLVDNKNDE.....GTPNAKPADK.....QN.....FITLLQDLR.....TA..   |
| CE08730_C._elegans   | .....A.....VQS.....EFCFLFEEVK.....IE..                       |
| Q8U1H4_P._furiosus   | .....GGMEGNY.....VSPD.....DG.....KN.....FVLLVKTVR.....EI..   |
| CE12474_C._elegans   | .....Q.....QFKTLS.....                                       |
| CE02990_C._elegans   | .....R.....DKN.....NYLMFIQELR.....YAFT                       |
| CE40270_C._elegans   | .....T.....YKS.....VYLHFICELK.....QQ..                       |
| CE40296_C._elegans   | .....S.....DEN.....NYLMFIRELR.....YAFT                       |
| ChiB_S._marcescens   | .....QAAE.....VDG.....FIAALQEIR.....TL..                     |
| O10363_O._pseudotsug | .....KGANPA.....LGNGE.....RDA.....DT.....YLVLLKELR.....AM..  |
| AAP29899_C._fumifera | .....KGANPT.....LGNGE.....RDA.....DT.....YNILLKELR.....AM..  |
| AAV73807_B._mori_NPV | .....KGANPS.....LGDAE.....RDA.....KT.....YILLDELRL.....EM..  |
| AAL56186_H._zea_SNPV | .....KGANPN.....VG DVE.....RDN.....NT.....YIALLGELR.....AM.. |
| AAF33549_S._exigua_N | .....KGANPD.....VGDAE.....RDR.....ET.....YTLLQELR.....LR..   |
| AAZ38189_A._segetum  | .....KGANPN.....VGDAE.....RDR.....AT.....YTALLSELRL.....VR.. |
| AAS82706_A._segetum  | .....KGANPE.....LG DPE.....KDG.....VT.....YVQLLKELR.....EM.. |
| ZP_01159013_Photobac | .....GGAAAD.....RGDAV.....KDG.....PA.....YIALMRELRL.....AM.. |
| ZP_01161077_Photobac | .....DGANPA.....LGNPE.....KDG.....QT.....YVTLMKELR.....AM..  |
| ZP_01159325_Photobac | .....GGLTTSPWNPDTKLSDEQKASEK.....EA.....YTHLVKTLH.....AE..   |
| ZP_01160869_Photobac | .....HGLSG.....LGNDNIESER.....LA.....YTKLIHELRL.....TQ..     |
| ZP_01233025_V._angus | .....GGAAAD.....RGDAV.....KDG.....PA.....YIALMRELRL.....AM.. |
| ZP_01236284_V._angus | .....DGANPA.....LGNPE.....KDG.....QT.....YVTLMKELR.....AM..  |
| ZP_01235109_V._angus | .....GGLTTSPWNPDTKLSDEQKASEK.....EA.....YTYLVKTLR.....AE..   |
| ZP_01235465_V._angus | .....HGLSG.....LGIDNV DNER.....LA.....YTKLIHELRL.....TQ..    |
| AAO08114_V._vulnific | .....DGAAPN.....LGDPA.....RDG.....QA.....YVDLMRELRL.....TM.. |
| AAO07498_V._vulnific | .....GGLTTSPWNPATKLSDEQKAAER.....DA.....FTYLVKTLR.....AD..   |
| NP_232428_V._cholera | .....GGQAAD.....LGDPV.....KDG.....PA.....YVALMAELRL.....AM.. |
| YP_432951_H._chejuen | .....DGAVPD.....ADRP.....EDA.....AN.....YVRLLEIR.....AG..    |
| YP_529337.1_B_S._deg | .....GGTAPE.....LSTA.....ADR.....DA.....YTALMRDLR.....AA..   |
| YP_435912_H._chejuen | .....GGANTG.....LGSP.....QDR.....DG.....YAEMLRDLR.....AA..   |
| ZP_01137509_A._cellu | P.....DGHVGNH.....YSPA.....DT.....AN.....FTALLAEFR.....SE..  |
| ChiE_S._coelicolor   | .....EGHPGNH.....YGAQ.....DK.....DN.....LTALLAEFR.....TR..   |
| ChiC_S._coelicolor   | .....CGLSCDE.....TSAP.....N.....AFS.....SM..                 |
| ChiD_S._coelicolor   | .....CGLSCD.....TSGR.....D.....AFP.....KL..                  |
| NP_903910_C._violace | .....GGLPTNT.....VDPN.....DK.....QN.....YTLLMAEFR.....NQ..   |
| YP_529072.1_S._degra | .....CGLSCD.....NSGY.....D.....GYR.....VL..                  |
| ZP_01431615_S._tropi | .....CGLTCD.....SSGP.....A.....AFK.....NV..                  |
| ZP_01136287_A._cellu | AGATLT.NGNGNPT.....ARPE.....DT.....RN.....FTLLLAEFR.....RQ.. |
| 01315.1_C._cinereus  | Q.GI.....GCN.....TINP.....QDT.....SN.....FLLFLQELR.....RD..  |
| 03252.1_C._cinereus  | Q.GL.....GCN.....IVHE.....DDT.....AN.....FLTFLRELRL.....NT.. |
| 05285.1_C._cinereus  | E.GI.....GCN.....LRTP.....EDT.....EN.....FLTFLRELRL.....EH.. |
| 05291.1_C._cinereus  | Q.GI.....GCN.....HISN.....ADS.....AN.....FLAFLQELR.....QD..  |
| 01586.1_C._cinereus  | P.GA.....GN.....PYSA.....NDT.....AN.....YLSLMKLLR.....NA..   |
| 128098_P._chrysospor | S.G.....DCN.....VNTP.....QDT.....QN.....FLLFLQELR.....SQ..   |
| 39872_P._chrysospori | A.GI.....GCN.....AVSP.....NDT.....AN.....FLTFLQELR.....AD..  |
| 138098_P._chrysospor | Q.GL.....GCN.....VISP.....QDT.....PN.....FLALLQELR.....AS..  |
| 129436_P._chrysospor | P.GA.....DGN.....AYAP.....QDT.....AN.....FLAFLRLRL.....QR..  |
| EAA71245_G._zeae     | Q.GL.....GCN.....TINE.....NDT.....AN.....FLEFLKELR.....KD..  |
| MGG_04732_M._grisea  | Q.GL.....GCN.....AISP.....NDT.....AN.....FISFLTELRL.....KA.. |
| UM06190_U._maydis    | A.GS.....GN.....LLDA.....SDT.....RN.....YQTFLETELRL.....AA.. |
| 04245_F._neoformans  | A.GA.....DGN.....AVSS.....DDS.....AN.....FLIFLQDLR.....AA..  |

|                      |                                                          |
|----------------------|----------------------------------------------------------|
| 16170_R._oryzae      | PDSI.....ANA.....ARNP..NDT.....AN.....LLFIKILLR....QK..  |
| 01334_R._oryzae      | RDSI.....ACA.....SRNP..NDT.....AN.....LLTFIQILLR....KS.. |
| 13934_R._oryzae      | PRGI.....FCN.....RRNL..QDT.....SN.....FLALIQLLR....ET..  |
| 07611_R._oryzae      | K.GA.....GCN.....AVND..NDV.....QN.....LNTLVKELR....SA..  |
| 10252_R._oryzae      | Q.AA.....GCN.....EVAD..DDA.....DN.....FLLLLKELR....LA..  |
| 14659_R._oryzae      | Q.GA.....GCN.....TFDEK..NDV.....KN.....FLTLLKELR....QA.. |
| 231399_L._bicolor    | Q.GA.....GFN.....VVS..HDA.....AN.....FLSFLLEELR....RD..  |
| 180319_L._bicolor    | S.GI.....GCN.....VMSP..SDS.....AN.....FLLFLQELR....LD..  |
| 191848_L._bicolor    | Q.GI.....GCN.....LISS..SDS.....AN.....FLSFLQELR....QD..  |
| 317003_L._bicolor    | P.GA.....GN.....PYSA..ADA.....AN.....LLSLITLLR....TA..   |
| 246840_L._bicolor    | Q.GI.....GCN.....TVNP..KDT.....AN.....FLSFLQQLR....TT..  |
| 144643_L._bicolor    | Q.GA.....GGN.....LVDP..HDT.....AN.....FLLFLQYLR....TV..  |
| 310136_L._bicolor    | Q.GL.....GCN.....AIS..SDS.....AN.....FLAFLQQLK....QD..   |
| 629882_M._xanthus    | V.....DKP.....A.....LLALIQALR....AA..                    |
| 630509_A_M._xanthus  | .....                                                    |
| YP_592598_Acidobacte | P.....DDT.....TH.....CTQIMEALR....HE..                   |
| YP_446903_S._ruber   | .....PGQD..NV.....YRPE..DK.....EN.....FTRLRLTVR....RH..  |
| ZP_00739282_B._thuri | .....ETIPGGS.....YRPE..DK.....QN.....FTLLLQDVR....NA..   |
| ZP_01245639_F._johns | SGGTDG.TEIVNGMPV.PPQKYS..DN.....KN.....LVLLLKAMR....QA.. |
| NP_976824_B._cereus  | .....ETIPGGS.....YRPE..DK.....QN.....FTLLLQEV..NA..      |
| YP_077581_B._licheni | .....GGLPGNS.....TRPE..DK.....RN.....YTLLLQEV..KK..      |
| 631138_M._xanthus    | .....GGLPGNS.....NSPA..DK.....QN.....YTLLMQEFR....SQ..   |
| ZP_01247029_F._johns | N.....GD.....YGGFVIALA....NK..                           |
| ZP_01234549_V._angus | G.....NG.....ANQ.....YADFNRLA....DR..                    |
| ZP_01160697_Photobac | G.....DG.....ANQ.....YADFNRLA....DR..                    |
| ZP_01158584_Photobac | D.....DTV.....AYN.....YTEFVNMLA....DR..                  |
| AN0549_E._nidulans   | DDRS.....G.....RE..EDY.....KN.....FPSFIANLK....KA..      |
| AN8481_E._nidulans   | DDRS.....G.....RP..ADY.....EN.....FPRFIANLK....KA..      |
| AN9390_E._nidulans   | EERS.....G.....AP..EDF.....EN.....YVSFLKNLR....AV..      |
| AN0517_E._nidulans   | SDRG.....G.....AP..QDA.....AN.....FN.....                |
| AN0541_E._nidulans   | GDRG.....G.....KD..EDY.....EN.....YVSLVREM..EA..         |
| AN5077_E._nidulans   | DDRG.....G.....SDSM.VDG.....EN.....YTLLKELQ....EA..      |
| AN0509_E._nidulans   | PDIP.....GI.....PAGSE.DEG.....DN.....YLFKFLVVLK....NL..  |
| AN7613_E._nidulans   | ADVL.....NI.....SPGLE.SDG.....PN.....YIAFIKKLR....KI..   |
| 07035_N._crassa      | EDRS.....G.....RG..ADY.....KN.....FVTFQKALY....DR..      |
| 07484_N._crassa      | PDIP.....GP.....PPGAD.DEG.....TN.....YLAFLVLK....NL..    |
| 05317_N._crassa      | PDIP.....GI.....PAASL.DDG.....PN.....YLAFLVLK....NL..    |
| EAA74768_G._zeae     | KDRG.....G.....ME..SDY.....EN.....FPKFMSNLK....DL..      |
| EAA78168_G._zeae     | TDRN.....G.....RE..SDF.....KA.....YPRFLKRLK....SA..      |
| EAA75711_G._zeae     | PKRG.....G.....RKL..ADT.....RN.....FSMLLREMR....AA..     |
| EAA68447_G._zeae     | PDIP.....GI.....PPADK.DEG.....KN.....YLAFLVLK....NL..    |
| EAA77156_G._zeae     | ASS.....DGSS.TDT.....AN.....YVEFLKIMR....SK..            |
| 12510_S._sclerotioru | DDRS.....G.....RE..VDF.....SN.....FPKFMDRLK....SS..      |
| 00773_S._sclerotioru | SDRS.....G.....RT..EDY.....AN.....YPKFLANLK....SA..      |
| 05454_S._sclerotioru | GDRG.....G.....KP..EDG.....IN.....FTKLLKEMR....TA..      |
| 00677_S._sclerotioru | LD.....DR.....DG.....FVALVREM..ES..                      |
| 02128_S._sclerotioru | PDIP.....GI.....PAGSL.DDG.....VN.....YVRFDELA....AV..    |
| MGG_04534_M._grisea  | EDRG.....G.....VP..EDF.....EN.....YVTMISRLR....MA..      |
| MGG_01336_M._grisea  | PNRG.....G.....SP..VDT.....AN.....YVSLVREL..VA..         |
| 14527_P._nodorum     | DDRG.....G.....AE..VDR.....DN.....YVALVKQMR....SA..      |
| 15411_P._nodorum     | PKRG.....G.....RK..EDT.....DN.....LVLLMKEMH....AA..      |
| 02214_P._nodorum     | SDRG.....G.....DS..GDK.....AN.....QVELLQDMR....QA..      |
| 04761_C._immitis     | DDRG.....G.....IP..GDG.....KN.....FVKFLKELN....DV..      |
| 04323_A._capsulatum  | DDRG.....A.....SK..EDF.....KN.....YVRLKELK....TA..       |
| 00533_B._fuckeliana  | DN.....DR.....DG.....FVALVREM..ES..                      |
| Chi18_1_H._jecorina  | PDIP.....GI.....PEGTE.DET.....TG.....YFLLLDLELK....LK..  |
| Chi18_8_H._jecorina  | PDIP.....DV.....PPGSA.SEG.....DN.....YLDLFLSLR....SR..   |
| Chi18_9_H._jecorina  | PDIP.....GI.....PKGLP.SDG.....PN.....YLETFLRALR....KA..  |
| Chi18_10_H._jecorina | TDLP.....I.....PAGSP.EDP.....AN.....YLRFLQLLR....KK..    |
| 02650_A._capsulatum  | N.GA.....DYK.....QIPNS.EKKWE..IDA.....YPCLLAEIR....SA..  |
| AN0221_E._nidulans   | N.GE.....DYK.....RIPNS.EKFWE..TAA.....YPQLLAEIR....AA..  |
| 06020_N._crassa      | N.GE.....DYK.....QIPNS.DKRWE..IAA.....YPLLLQELR....SA..  |

|                      |                                                         |
|----------------------|---------------------------------------------------------|
| EAA76014_G._zeae     | N.RD....DYK.....EIPNS.EREWE...IEA.....FVSLLELR...AA..   |
| Chi18_4_H._jecorina  | N.RD....DYK.....LIPNS.QRKWE...IEA.....FPLLVAELR...SA..  |
| 09277_P._nodorum     | N.GE....DYK.....VNPNS.SKVWE...ITA.....FPPELLAAVR...AA.. |
| 05838_A._capsulatum  | N.GL....DYK.....ETSNS.AKKSE...IDN.....FPLFLKEIR...NA..  |
| EAA69039_G._zeae     | N.GQ....DYK.....QVPNS.KKTYE...IKA.....FPKLLKEIK...KF..  |
| MGG_06594_M._grisea  | N.GQ....DYK.....QNPNS.GRVSE...IET.....FPLLLQDIK...AA..  |
| Chi18_11_H._jecorina | N.GE....DYK.....VVPNS.EKAWE...IEA.....YPLFLEAVR...KA..  |
| 02644_A_P._nodorum   | N.GG....DYK.....EVLNS.DKAYQ...IEA.....YPKFLAAIR...AA..  |
| AN9447_E._nidulans   | N.GE....DYK.....KVPND.QKVDE...IET.....FPLLLQALR...TA..  |

|                      |                                                          |                                            |     |     |     |     |
|----------------------|----------------------------------------------------------|--------------------------------------------|-----|-----|-----|-----|
|                      | 370                                                      | 380                                        | 390 | 400 | 410 | 420 |
| NP_979924_B._cereus  | .... .... .... .... .... .... .... .... .... ....        | .LPN....GYT.....LSTTLVPKTSSNQK.....GKFFEAH |     |     |     |     |
| YP_077302_B._licheni | .FRQ....EGWL.....ISTALAPKTRADQP.....GQWYEAH              |                                            |     |     |     |     |
| YP_091539_B._licheni | .LKP....SGYV.....LTIIVPPKTEN.....IAWLKGYD                |                                            |     |     |     |     |
| YP_079121_B._licheni | .LKP....SGYV.....LTIIVPPKTEN.....IAWLKGYD                |                                            |     |     |     |     |
| YP_074366_S._thermop | .IHG....EGAL.....ISTALAPKVSAGQT.....GQWYEAH              |                                            |     |     |     |     |
| YP_075811_S._thermop | .LHA....EGRS.....LSTAIAPKVRADQP.....GLLYEAH              |                                            |     |     |     |     |
| YP_075619_S._thermop | .LKP....GGIR.....LTLSPAKTWDDTT.....SNWGGAF               |                                            |     |     |     |     |
| ZP_01354047_C._phyto | .MNE....EDFF.....VSVALAPKTSENQP.....GLLYEGM              |                                            |     |     |     |     |
| ZP_01354926_C._phyto | .CRS....NQIV.....LSSDTYVPASYS.....KFYD                   |                                            |     |     |     |     |
| NP_902406_C._violace | .LHA....KGLK.....LIVSVPAFSAKDEN.....HPANYGYD             |                                            |     |     |     |     |
| ZP_01136704_A._cellu | .LHQ....HGMT.....LAVDVMSKTSEPGA.....TPAGQVYD             |                                            |     |     |     |     |
| ZP_00526542_S._usita | .LGR....GGFK.....LSIATVPNEGDEPGKSDYTRWVFQNRGAF           |                                            |     |     |     |     |
| AAF46212.1_D._melano | .WRR....EKRTN.....DILSLAVAPEGIAFY.....AYD                |                                            |     |     |     |     |
| AAF46534.1_D._melano | .EHK....EAF TALVRELKNAFRP.DGYILGLSVLPNVNSS.....LFFD      |                                            |     |     |     |     |
| AAF46544.1_D._melano | .FER....EAEKTGR.....TRL L L TMAVPAGIEYID.....KGYD        |                                            |     |     |     |     |
| At4g19720_A._thalian | .IED....DAERTER.....MPL L L TAAVYYSVPYDS.....VSYP        |                                            |     |     |     |     |
| At4g19750_A._thalian | .VVE....ESDRTNQ.....LP L L L TAAVYYSPTYG.....EEYP        |                                            |     |     |     |     |
| EAA67655_G._zeae     | .LDK....YSQDY....K..LNY...RFL L TVASPA..GSSHY.....NTMD   |                                            |     |     |     |     |
| EAA73155_G._zeae     | .LDT....YSKQY....AS..GY...HFQLSIAAPA..GPENY.....GKLK     |                                            |     |     |     |     |
| EAA74986_G._zeae     | .LDS....YASQN....AP..GH...HFL L SIAAPA..GPEKY.....KKLH   |                                            |     |     |     |     |
| EAA74223_G._zeae     | .MDA....YAQTL....S..RPY...HFELTVACPA..GATNF.....QKLD     |                                            |     |     |     |     |
| MGG_05533_M._grisea  | .LDD....YSQQH....TG..SQY...KFSL S MPAPA..GP THY.....AAFD |                                            |     |     |     |     |
| MGG_01247_M._grisea  | .LDA....YSAKN....AQ..GY...KFL L TVATPA..GPENY.....GNMN   |                                            |     |     |     |     |
| MGG_00086_M._grisea  | .LDA....YAAQH....AP..GY...HFL L TIASPA..GP THY.....QKMQ  |                                            |     |     |     |     |
| MGG_07927_M._grisea  | .LDA....YASHV....DGENPY...HFELTVACPA..GASNY.....EKMD     |                                            |     |     |     |     |
| Chi18_6_H._jecorina  | .LDE....YASLH....N..QRY...HYLLTAAVSA..AQQHY.....KWL D    |                                            |     |     |     |     |
| Chi18_5_H._jecorina  | .LDA....YAAQH....AP..GY...HFL L SIAAPA..GEVNY.....SLLR   |                                            |     |     |     |     |
| Chi18_7_H._jecorina  | .LDA....YSATL....P..NYS...HFELTVACPA..GP THF.....QKLD    |                                            |     |     |     |     |
| 04883_N._crassa      | .MDK....YAAAH....AD..GY...HFL L TMAASA..GPSKY.....GVLE   |                                            |     |     |     |     |
| 04554_N._crassa      | .LDA....YASTV....PG..NP...HFEMSVACPA..GPQNY.....EKMD     |                                            |     |     |     |     |
| 11407_B._fuckeliana  | .LDA....YAAQH....AP..GY...HFLITVASPA..GPEKY.....NVLH     |                                            |     |     |     |     |
| 05350_B._fuckeliana  | .MDR....YSNTL....P..TPH...HFELTVACPA..GPQNY.....NNMD     |                                            |     |     |     |     |
| 11700_S._sclerotioru | .LDA....YAARY....AP..GY...HFLITAATPA..GPDHY.....NVLH     |                                            |     |     |     |     |
| 11304_S._sclerotioru | .MDR....YSSTL....S..NFH...HFELTVACPA..GPQNY.....NNMD     |                                            |     |     |     |     |
| 08020_S._sclerotioru | .LDR....FGDSL....Q..SPY...HFL L TVASPA..SPAVC.....QNWK   |                                            |     |     |     |     |
| 01250_A._capsulatum  | .LDS....YAAQH....A..QPK...RLL L TVAVPC..GPSNY.....KKLR   |                                            |     |     |     |     |
| 05886_A._capsulatum  | .LD....ALSK.......NR...KFYLTVACPA..GPKHF.....KKLR        |                                            |     |     |     |     |
| 06565_A._capsulatum  | .LDR....AGGK.......DR...RFL L TVACPA..GRQNF.....EKLR     |                                            |     |     |     |     |
| 05250_C._immitis     | .LEN....YAAQY....A..QGR...HFL L TIAAPC..GPKNY.....SQLR   |                                            |     |     |     |     |
| 02795_C._immitis     | .LDA....YSAKH....P..NGK...KFL L TIASPA..GPQNY.....NKLK   |                                            |     |     |     |     |
| 03822_C._immitis     | .LN....SVAG.......GR...KFL L TIAASA..GAEHY.....EKLH      |                                            |     |     |     |     |
| AN5454_E._nidulans   | .LDR....YAADN....D..SDK...PFL L SVASPAEPGPSKY.....TTLH   |                                            |     |     |     |     |
| AN4871_E._nidulans   | .LN....AAQG.......QR...RFQLTVAVPA..GPDNY.....NKL R       |                                            |     |     |     |     |
| 00269_P._nodorum     | .LDA....YSAAH....A..PNQ...HLL L TVASPA..GAKNY.....NIMK   |                                            |     |     |     |     |
| 04870.1_C._cinereus  | .LDQ....REREN....GE..GC...KFL L TIAAPC..GPDNY.....KKLL   |                                            |     |     |     |     |
| 09921.1_C._cinereus  | .LTQ....LASRK....GE..SN...PYLITAAVGA..GPAGY.....SNLK     |                                            |     |     |     |     |
| 124149_P._chrysospor | .LDQ....HAAKK....GA..NY...RFL L TIAAPC..GPDNY.....KKLF   |                                            |     |     |     |     |
| 134311_P._chrysospor | .FDT....YQAQK....GD..TT...PYLLTSAVSA..GSANY.....EYLV     |                                            |     |     |     |     |
| 03412_F._neoformans  | .LEQ....LAQSK....GKP.QG...QYQLTVAAPC..GWEQM.....QVLR     |                                            |     |     |     |     |
| 13635_R._oryzae      | .MDK....YQQQC....GQLNQP...RLL L TVAVPC..GPDHY.....RKLR   |                                            |     |     |     |     |



|                      |                                                      |
|----------------------|------------------------------------------------------|
| UM04261_U._maydis    | .LTA...HQAKK....NE..TN..PYLLSIAAPC..GPDHY.....KVLQ   |
| EAA69503_G._zeae     | .LP.....EE...HYVLTAALPA..AKAVL.....QFLD              |
| EAA70860_G._zeae     | .MT.....HS...QFLLTALPT..GEYCL.....KHIN               |
| Chi18_3_H._jecorina  | .LP.....DD...RFILTAVLPA..AKEVL.....QLID              |
| Chi18_2_H._jecorina  | .LP.....EP...NYLITTALPV..GQYIL.....RHID              |
| 03026_N._crassa      | .LP.....ED...RYLLTAALPG..AKSIL.....QNIN              |
| 01594_B._fuckeliana  | .LP.....DE...RYLLTAALPA..GRWAL.....QNID              |
| 05897_S._sclerotioru | .LP.....DE...RYLLTAALPA..GRWAL.....QNID              |
| 04742_A._capsulatum  | .FP.....SP...AYLLTTALSA..GEWVL.....NKIN              |
| 04750_C._immitis     | .LP.....WP...QYTLTTALPA..GEWAL.....RHIN              |
| 04719_P._nodorum     | .LP.....GP...QYTLSTALPA..GEWAL.....QHIN              |
| MGG_08458_M._grisea  | .LP.....AP...RYLLTTALPC..GEWAL.....QHIP              |
| CHT4_C._albicans     | .LN.....S...KYIITVAAPG..GSDNI.....EILK               |
| 01119_L._elongisporu | .LP.....P...QRLLTIAAPG..GHEHI.....KQLP               |
| XP_454053_K._lactis  | .MDQ...LERQIFGSPAEEKDHP...HFQLSVATPA..FAEKL.....NILP |
| CTS2_S._cerevisiae   | .LNS...LESQIFGKRTED...HFQLSIAAPA..FKDKL.....FYLP     |
| 246746_L._bicolor    | .LDQ...HASVK....GA..GC...KFLLTIAAPC..GPDNY.....KKLR  |
| 03209_N._crassa      | .LDD...YARQY....AP..GY...HFLITIAAPA..GPQHY.....GVMD  |
| 14474_P._nodorum     | .YDE...YAAAN....AH..GY...HFDLGISAPA..GPSRY.....SVLR  |
| CE06282_C._elegans   | .FEAK...KK.....YYILSIVIPPTLDG.W.....G.KKR.           |
| CE03547_C._elegans   | .LQRQ...KR.....NYIMSIVLPPPDGMANY.....E.AGID          |
| CE03542_C._elegans   | .LDKQ...LK.....SYIVSILLPPAGVDI.W.....E.MGYD          |
| CE15845_B_C._elegans | .LQT.....QYLLISIQVP.AFMQN.....YN                     |
| CE02997_C._elegans   | .ELQKKL.NRK.....ETFVISLVISR...NV.....N.HLSN          |
| CE36953_C._elegans   | .DLESET.GKS.....YLISFAGAAG..HWVL.....K.PGYD          |
| YP_432439_H._chejuen | .LDAAS..AEDG.....KHYMLTIASPS...SGYL.....L.RGME       |
| YP_529449.1_S._degra | .LDIAG..EQDG.....KHYMLTIASPS...SGYL.....L.RGME       |
| YP_077582_B._licheni | .LDQAS..AEDG.....KYYMLTIAAPS...SAYL.....L.RGME       |
| ChiI_S._coelicolor   | .LDRAG..AADG.....RHYLLSVAAPS...SGYL.....L.RGME       |
| NP_902986_C._violace | .LDRAA..AQDG.....RYYQITAAPVPA..SGYL.....L.RGME       |
| ZP_01159608_Photobac | .LDVAS..AEDD.....IHYMLTIAAPS...SGYL.....L.RGME       |
| ZP_01234708_V._angus | .LDVAS..AEDG.....IHYMLTIAAPS...SGYL.....L.RGME       |
| NP_233087_V._cholera | .LDQAS..AQDG.....HHYMLTIAAPS...SGYL.....L.RGME       |
| NP_230718_V._cholera | .LDKAG..EEDG.....RRYMLTIASPS...SAYL.....L.RGMQ       |
| AAO07185_V._vulnific | .LDQAS..AQDG.....VHYMLTIAAPS...SGYL.....L.RGME       |
| ZP_01354150_C._phyto | .FN....ELSKT.....SDK..KYTLSFAAP..AGD.....WAV         |
| ZP_01246933_F._johns | .....T.....LGK..KYELSFAAGG..FQK.....CLD              |
| YP_012734_L._monocyt | .LD....KQGVVD...INK..KYELSVALPA..AKS.....TLE         |
| YP_529337.1_A_S._deg | .LDARGNGE.....LVTIAGAGGAFFLS.....RYYS                |
| ChiA_A_P._kodakarae  | .LD....KAAKE.....DHK..DYLLTAATPA..DPV.....KAG        |
| AAG19274_Halobacteri | .LD....VAEDE.....DGK..RYQLTTALSA..DPE.....KNT        |
| AAG19275_Halobacteri | .LN....DAEVE.....DGR..TYDLSVANGG..SDW.....NAA        |
| CE03543_C._elegans   | .LRSH...RQ.....NYIISIVLPPAGVDT.W.....E.LGYD          |
| CE34961_C._elegans   | .LKTV...RD.....DSIISIVAPQAKMDR.R.....H.DGYK          |
| CE20043_C._elegans   | .LG.....Y.....EFIISVAVPQAEVSN.L.....E.LGYD           |
| CE15845_A_C._elegans | .LKNQ...EK.....RYILSVVPPVDVDN.F.....E.MGFD           |
| CE32863_A_C._elegans | .LKNQ...EK.....RYILSVVPPVDVDN.F.....E.MGFD           |
| CE03544_C._elegans   | .VDEL...DA.....KIIISITIPPVGVS.D.W.....E.SGFD         |
| CE08731_C._elegans   | .LMNQ...EK.....QYILSVGAPPAGIEN.L.....E.DGYD          |
| CE28638_C._elegans   | .LQRE...LEGL.....RDPLTILSVVVP.HYINH.R.....E.AGYS     |
| CE32863_B_C._elegans | .LQT.....QYLLISIQVP.AFMQN.....YN                     |
| CE01673_C._elegans   | .LEKQ...EK.....QYSISLRVPQTGIG.KW.....H.IGCE          |
| CE02993_C._elegans   | .ELQKRT.NRK.....NEYIISLLVPK...KS.....Y.WSFD          |
| CE02996_C._elegans   | .ELQKRW.NRK.....NEYIISLIVPK...EK.....H.WSFD          |
| CE02995_C._elegans   | .ELQKKL.NRK.....EDYVISIIVNC...YD.....N.QLSN          |
| CE02992_C._elegans   | .KLEK...H.....MIISIAIPR...LAQQ.....L.EGFN            |
| CE02999_C._elegans   | .NLKDEN.GRS.....NEYVISVIAPSS..SSHS.....E.YPYK        |
| CE02998_C._elegans   | .ALTKAQ.PKG.....TRYLLSIIVPSS..PSDL.....E.YYLR        |
| CE09229_C._elegans   | .EMAKKK.KRK.....DPYVITLASAAG..EWNL.....R.KGYD        |
| CE12928_C._elegans   | .GMASRN.NRK.....DPYLITLASAAG..EWNL.....R.EGYD        |
| CE23907_C._elegans   | .....E.....EG.W.....E.RAYD                           |
| CE32917_C._elegans   | .FQME...EK.....NYILSIIIPP CGFGG.W.....N.NKFD         |

|                      |                      |                                          |         |
|----------------------|----------------------|------------------------------------------|---------|
| CE34579_C._elegans   | .LKTR.....K.....     | DYILSILVPPQGIG..F.....                   | A.SGFK  |
| CE25073_C._elegans   | .LQRQ.....KR.....    | NYIMSIIVLPPDGMANY.....                   | E.AGID  |
| CE03548_C._elegans   | .LQQK.....NK.....    | NYILSIIVLPPPDLEGNY.....                  | E.AGIN  |
| NP_469498_L._innocua | .LD.....KQGV.....    | INK.....KYELSVALPA..AKS.....             | TLE     |
| CE08730_C._elegans   | .FLNQ.....EK.....    | QYILSITAPPVGIEN.Y.....                   | E.DGYD  |
| Q8U1H4_P._furiosus   | .FD.....QAELE.....   | DKK.....RVSPNCSSSS.....                  |         |
| CE12474_C._elegans   | .....                | IMLHL.....SN.....                        |         |
| CE02990_C._elegans   | ELQNK.....NRK.....   | EDFVISLVASS.....NL.....                  | N.LLFN  |
| CE40270_C._elegans   | .LQTK.....DK.....    | DYILSIVVPPPEVGG.W.....                   | I.DGFD  |
| CE40296_C._elegans   | ELQKKL.....NRK.....  | ETFVISLVISR.....NV.....                  | N.HLSK  |
| ChiB_S._marcescens   | .LNQQTIA...DGRQ..... | AL.....PYQLTIAGAGGAFFLS.....             | RYYS    |
| O10363_O._pseudotsug | .LD.....ELQLQ.....   | TNK.....TYELTS...AIS...GYD.....          | KIA     |
| AAP29899_C._fumifera | .LD.....QLQLQ.....   | TGK.....TYELTS...AIS...GYD.....          | KIA     |
| AAV73807_B._mori_NPV | .LD.....DLEVQ.....   | TGR.....VYELTS...AIS...GYD.....          | KIA     |
| AAL56186_H._zea_SNPV | .LD.....QVQIQ.....   | TNR.....TLELT...AIS...GYD.....           | KIA     |
| AAF33549_S._exigua_N | .LN.....ALGAR.....   | TNR.....YYALT...SAV...SA...GND.....      | KIA     |
| AAZ38189_A._segetum  | .LD.....ALGVR.....   | TNR.....YYALT...SAV...SA...GND.....      | KIA     |
| AAS82706_A._segetum  | .LN.....DLSKE.....   | TGK.....KYQLT...SAV...SA...GYD.....      | KIS     |
| ZP_01159013_Photobac | .LD.....KLEAD.....   | TGR.....TYELT...SAV...SA...GYD.....      | KIE     |
| ZP_01161077_Photobac | .LD.....ELSAE.....   | TGR.....QYELT...SAV...SA...SEK.....      | GIN     |
| ZP_01159325_Photobac | .LD.....NLEKK.....   | TGR.....QYELT...SAV...SA...GSK.....      | AES     |
| ZP_01160869_Photobac | .LN.....TLGIE.....   | NQR.....TYQLT...SAV...SA...APK.....      | TLP     |
| ZP_01233025_V._angus | .LD.....KLEAD.....   | TGR.....TYELT...SAV...SA...GYD.....      | KIE     |
| ZP_01236284_V._angus | .LD.....ELSAE.....   | TGR.....QYELT...SAV...SA...SEK.....      | GIN     |
| ZP_01235109_V._angus | .LD.....NLEKK.....   | TGR.....EYELT...SAV...SA...GSK.....      | AES     |
| ZP_01235465_V._angus | .LN.....TLGIK.....   | NKR.....TYQLT...SAV...SA...APK.....      | TLP     |
| AAO08114_V._vulnific | .LN.....ELEAE.....   | TGR.....TYELT...SAV...SA...GHD.....      | KIE     |
| AAO07498_V._vulnific | .LD.....ALEKK.....   | TNR.....EYELT...SAV...SA...GAK.....      | AAQ     |
| NP_232428_V._cholera | .LD.....ELEAE.....   | TGR.....KYELT...SAV...SA...GHD.....      | KIE     |
| YP_432951_H._chejuen | .MD.....WLGRK.....   | TGK.....QYRLT...SAV...SA...GTG.....      | RLD     |
| YP_529337.1_B_S._deg | .LD.....ELAEE.....   | TGR.....EYELT...SAV...SA...APE.....      | KIA     |
| YP_435912_H._chejuen | .LD.....TLEAE.....   | TGR.....EYQLT...SAV...SA...APS.....      | KID     |
| ZP_01137509_A._cellu | .LD.....AYGAS.....   | VGR.....KMYLT...AAL...PS...GQD.....      | KIR     |
| ChiE_S._coelicolor   | .LD.....ALGGE.....   | HR.....LLTAF...TPA...DPA.....            | KIE     |
| ChiC_S._coelicolor   | .MK.....AMRAE.....   | FGQ.....DYLIT...AAV...TA...DGS...DG..... | GKID    |
| ChiD_S._coelicolor   | .MG.....ALRAK.....   | FGQ.....DYLVT...AAI...TA...DATAG.....    | GKID    |
| NP_903910_C._violace | .LN.....ALSTA.....   | NKR.....RYLLT...AAI...GS...GVD.....      | KIR     |
| YP_529072.1_S._degra | .MQ.....ALRNR.....   | FG.....NKLVT...AAI...GA...GES.....       | KQN     |
| ZP_01431615_S._tropi | .VD.....ALRSR.....   | FGP.....SALVT...AAI...TG...DASNG.....    | GRID    |
| ZP_01136287_A._cellu | .LDS.....AARAN.....  | HHR.....RYLLT...AAL...SA...NPT.....      | KIA     |
| 01315.1_C._cinereus  | .PVG.....SKLL.....   | .....VTAAA...ATVPFYGSN.....              | GRPSSD  |
| 03252.1_C._cinereus  | .TTG.....RDLV.....   | .....LSAAV...YVKPFNDAS.....              | GSPSTD  |
| 05285.1_C._cinereus  | .PVG.....VNLK.....   | .....LTAAH...HITPLMDAT.....              | GTPGSD  |
| 05291.1_C._cinereus  | .PTG.....GKLM.....   | .....LTAAG...VLLPFVGSN.....              | GQPMSSD |
| 01586.1_C._cinereus  | .MG.....PCKI.....    | .....LSSAV...AHL...PWLGSN.....           | GRPLTN  |
| 128098_P._chrysospor | .AP.....NIT.....     | .....LSAAV...ALT...PFDVTS.....           | GSPATD  |
| 39872_P._chrysospori | .PDG.....KDLI.....   | .....LSAAT...PVL...PWKDET.....           | GSPSTD  |
| 138098_P._chrysospor | .PAG.....QNMT.....   | .....ISTAT...SIV...PFTSPD.....           | GTPTAD  |
| 129436_P._chrysospor | .LP.....PQAK.....    | .....ISAAAM...TV...PWADAH.....           | GAPLAD  |
| EAA71245_G._zeae     | .PVG.....KDLY.....   | .....LTAAG...SLL...PWNDKD.....           | GAPSKD  |
| MGG_04732_M._grisea  | .QP.....KPLL.....    | .....LTAAG...VSL...PYNDAA.....           | GQQSAN  |
| UM06190_U._maydis    | .LP.....KGAL.....    | .....ITGAV...AHT...PVMASN.....           | GQPVAS  |
| 04245_F._neoformans  | .LP.....SEAI.....    | .....ITTAT...QV...WPFADS.....            | GNPMTD  |
| 16170_R._oryzae      | .LDITTFPKAHKV.....   | .....ITVAAS...VGPFLDER.....              | GRSIRH  |
| 01334_R._oryzae      | .LDAKYPKVHKV.....    | .....ITVAAS...VGPFLDSN.....              | GHAVRH  |
| 13934_R._oryzae      | .LDKKYPKEHKI.....    | .....ITAAG...VSTYTFKDDK.....             | QNSIKT  |
| 07611_R._oryzae      | .LDNSFPNDHKE.....    | .....LTMAV...HIT...PFG..G.....           | ATPVTD  |
| 10252_R._oryzae      | .LDTKFPQKHKE.....    | .....ISMAV...HV...QPFVRS.....            | GTPMSD  |
| 14659_R._oryzae      | .IRREFK.EKKE.....    | .....ITIAAF...VNPLA.....                 | AD      |
| 231399_L._bicolor    | .PVG.....SSLV.....   | .....LSACAS...VVPFAGED.....              | GKPSGD  |
| 180319_L._bicolor    | .PVG.....SKLI.....   | .....ISAAAG...IT...PFTGSD.....           | GKPMSSD |
| 191848_L._bicolor    | .PMG.....STLI.....   | .....LSSAV...GLTPYAGSD.....              | GTPMAD  |

|                      |                                                  |
|----------------------|--------------------------------------------------|
| 317003_L_bicolor     | .LG.....PCKI.....ISAAVAHLPWLGSN.....GKPLTD       |
| 246840_L_bicolor     | .TTG.....SKLI.....ISVPV.AAPFADAS.....GSPSTN      |
| 144643_L_bicolor     | .LP.....PCAR.....ISAAAQTLPFVDAQ.....EQPLQD       |
| 310136_L_bicolor     | .PVG.....SKLI.....LSAAVGETPFMGAN.....GTPMTD      |
| 629882_M_xanthus     | .RPQ.....MLLT.....MPIGWVNSNFPEDA.....DP.....     |
| 630509_A_M_xanthus   | .....                                            |
| YP_592598_Acidobacte | .LPS.....PRWL.....ISMAIPSDPRGYGT.....G.....FD    |
| YP_446903_S_ruber    | .LEK.....QGRAD.....GHTGDERYLLTIAAGA..DAD.....YL. |
| ZP_00739282_B_thuri  | .LN.....KAGAE.....DGK...QYLLTIASGA..SQR.....YAD  |
| ZP_01245639_F_johns  | .MP.....N.....KLVTTAAGN..NVR.....NVS             |
| NP_976824_B_cereus   | .LT.....KAGAE.....DGK...QYLLTIASGA..SQR.....YAD  |
| YP_077581_B_licheni  | .LD.....AAEAK.....DGK...EYLLTIASGA..SPD.....YVS  |
| 631138_M_xanthus     | .LN.....AVTTQ.....TGK...PYLLTIATGA..SPD.....LLE  |
| ZP_01247029_F_johns  | .LHA.....NGKL.....ISAALS EGYGGANV.....P.....     |
| ZP_01234549_V_angus  | .LHA.....EGKY.....FTAAIIGSKDKPND.....DGKGAG      |
| ZP_01160697_Photobac | .LHA.....EGKY.....FTAAIIGSKDKPND.....DGKGAG      |
| ZP_01158584_Photobac | .LHE.....EGLY.....FTAALINGRGTQTK.....DKSECG      |
| AN0549_E_nidulans    | .LK.....ASGGRD.....GLSITLPASYWYL.....QHFD        |
| AN8481_E_nidulans    | .LK.....GSGGRD.....GLSITLPASYWYL.....QHFD        |
| AN9390_E_nidulans    | .LG.....NRG.....LTITLPASFWYL.....QHFD            |
| AN0517_E_nidulans    | .....PGW.....EISATLPTS YWYL.....RGFD             |
| AN0541_E_nidulans    | .FQ.....KRNP SW.....DISMAIPASYWYL.....QHFD       |
| AN5077_E_nidulans    | .IT.....ASGRNY.....LVTFTAPT SYWYL.....RHFD       |
| AN0509_E_nidulans    | .LK.....DKS.....VSIAAPASYWYL.....RGFP            |
| AN7613_E_nidulans    | .FP.....SDKT.....ISVAAPATY WHL.....KSFP          |
| 07035_N_crassa       | .MK.....GGGLKK.....QVSLTLPASYWYL.....QHFD        |
| 07484_N_crassa       | .LP.....GKT.....VSIAAPASYWYL.....KQFP            |
| 05317_N_crassa       | .LP.....GKS.....ISIAAPSSYWYL.....KQYP            |
| EAA74768_G_zeae      | .ME.....DGD..R.....GLTITLPASYWYL.....QYFD        |
| EAA78168_G_zeae      | .LN.....NYK..Y.....GLSVTLTTSYWYL.....QHFD        |
| EAA75711_G_zeae      | .YG.....DKY.....GISLTLAPDYWYL.....RWFD           |
| EAA68447_G_zeae      | .LK.....GKS.....VSIAAPSSYWYL.....KQYP            |
| EAA77156_G_zeae      | .IGK.....SGKT.....MSVALPAAYWYL.....KPFP          |
| 12510_S_sclerotioru  | .MD.....SAS..K.....GVSITLPASYWYL.....QHFD        |
| 00773_S_sclerotioru  | .LD.....EYS..Y.....GLSITLPTS YWYL.....QHFD       |
| 05454_S_sclerotioru  | .FD.....GMSGRYK.....EISFTAPT SYWYL.....RHFD      |
| 00677_S_sclerotioru  | .FN.....ENFP EKNW.....GISVVLPPDISAL.....QFFD     |
| 02128_S_sclerotioru  | .LP.....AGTT.....QSVTAPT SYWYL.....APFL          |
| MGG_04534_M_grisea   | .LN.....ASGKRY.....GLSITLPASYWYL.....RGFD        |
| MGG_01336_M_grisea   | .FG.....TQY.....GLSMAIPADWGSM.....LYFD           |
| 14527_P_nodorum      | .FG.....SKYG.....ITVTLP TS YWYL.....QHFD         |
| 15411_P_nodorum      | .FA.....GRY.....GSSLTIAPDYWYL.....R...           |
| 02214_P_nodorum      | .LG.....NNI.....GLGVAIPAQYTYL.....QNID           |
| 04761_C_immitis      | .NK.....KQPMHY.....SVSFTAPSSYWYL.....RHFD        |
| 04323_A_capsulatum   | .IA.....DKYG.....LTVALPAS YWYL.....RGFD          |
| 00533_B_fuckeliana   | .FS.....ANYPGKNW.....GISVVLPPDIYSL.....QFFD      |
| Chi18_1_H_jecorina   | .LP.....SNRT.....VSITAPASFWYL.....QYFP           |
| Chi18_8_H_jecorina   | .LS.....KDKS.....ISIAIPASFWYL.....QSYF           |
| Chi18_9_H_jecorina   | .LP.....SKYS.....LSIAVPA.....SYC                 |
| Chi18_10_H_jecorina  | .LP.....AEMS.....LSIAAPASFWYL.....KAFF           |
| 02650_A_capsulatum   | .LGS.....DKT.....ISAAVPGLPRDMLA.....FTP.ET       |
| AN0221_E_nidulans    | .IP.....DKL.....ITAAMPGLPRDMLA.....FTK.ET        |
| 06020_N_crassa       | .LGP.....DKV.....ISAAVPGLHRDMLA.....FTR.ET       |
| EAA76014_G_zeae      | .LGP.....EKI.....LSAAVPGKEGDLMA.....FTT.DT       |
| Chi18_4_H_jecorina   | .LGD.....DKL.....LSVAVPALERDLMA.....FTN.ST       |
| 09277_P_nodorum      | .VGP.....LMT.....ISAAVPGLERDMLA.....FTP.AT       |
| 05838_A_capsulatum   | .IGT.....EKQ.....LSIAVPGRKSDMIA.....YTP.EN       |
| EAA69039_G_zeae      | .IGE.....KE.....LSIAVPGLERDMIA.....YLP.TE        |
| MGG_06594_M_grisea   | .IGT.....KE.....LSIAVPGKEVDMIA.....YTA.EQ        |
| Chi18_11_H_jecorina  | .LPE.....NIE.....LSIAVPPARVEDMMA.....FTA.EN      |
| 02644_A_P_nodorum    | .IGN.....KL.....LSIAVPGKKGDMIA.....YTK.ET        |
| AN9447_E_nidulans    | .VGD.....KKI.....ISIATPGKREDMIA.....YTT.EQ       |

|                      | 430               | 440             | 450                 | 460 | 470 | 480 |
|----------------------|-------------------|-----------------|---------------------|-----|-----|-----|
| NP_979924_B._cereus  | .....YKAQGQI..... | .....VDFVV..... | .....IMTYDWGW.....  |     |     |     |
| YP_077302_B._licheni | .....YRAHGEI..... | .....VDFVV..... | .....LMTYEWGY.....  |     |     |     |
| YP_091539_B._licheni | .....YGGIGAV..... | .....SDLIF..... | .....IMAYDWHH.....  |     |     |     |
| YP_079121_B._licheni | .....YGGIGAV..... | .....SDLIF..... | .....IMAYDWHH.....  |     |     |     |
| YP_074366_S._thermop | .....YAAHGQT..... | .....VDFVV..... | .....LMTYEWGY.....  |     |     |     |
| YP_075811_S._thermop | .....YPVHGEV..... | .....CDFVV..... | .....IMTYEWGY.....  |     |     |     |
| YP_075619_S._thermop | .....YAAIGEI..... | .....ADEIA..... | .....IMAYDEHT.....  |     |     |     |
| ZP_01354047_C._phyto | .....YRLLEGA..... | .....ANSVL..... | .....LMTYEWGY.....  |     |     |     |
| ZP_01354926_C._phyto | .....RQEQGAV..... | .....LDYVI..... | .....IMAYDEHH.....  |     |     |     |
| NP_902406_C._violace | .....LRALGAA..... | .....ADYLQ..... | .....IMSYDEAI.....  |     |     |     |
| ZP_01136704_A._cellu | .....YPTIGRW..... | .....ADRVV..... | .....IMTYDQHS.....  |     |     |     |
| ZP_00526542_S._usita | .....LRQLAPY..... | .....VDFIS..... | .....LMTYDQHT.....  |     |     |     |
| AAF46212.1_D._melano | .....IREINLY..... | .....ADYVN..... | .....LMSYDFHF.....  |     |     |     |
| AAF46534.1_D._melano | .....VPAIINN..... | .....LDYVN..... | .....LHTYDFQT.....  |     |     |     |
| AAF46544.1_D._melano | .....VPKLNKY..... | .....LDWFN..... | .....VLTDFHS.....   |     |     |     |
| At4g19720_A._thalian | .....IREIKKK..... | .....LDWVN..... | .....LIAYDFYS.....  |     |     |     |
| At4g19750_A._thalian | .....VQAADN.....  | .....LDFVN..... | .....IMAYDFYG.....  |     |     |     |
| EAA67655_G._zeae     | .....LKKMDPW..... | .....VDAWH..... | .....LMAYDYAG.....  |     |     |     |
| EAA73155_G._zeae     | .....MKEIGSV..... | .....LDHIN..... | .....LMAYDYAG.....  |     |     |     |
| EAA74986_G._zeae     | .....LDKISNI..... | .....VDQIN..... | .....IMAYDYSG.....  |     |     |     |
| EAA74223_G._zeae     | .....IRGMDRY..... | .....LDFWN..... | .....LMAYDYAG.....  |     |     |     |
| MGG_05533_M._grisea  | .....FKAMDAS..... | .....LDFWS..... | .....IMAFDFAG.....  |     |     |     |
| MGG_01247_M._grisea  | .....LEGMDKF..... | .....VDFWN..... | .....LMAYDYAG.....  |     |     |     |
| MGG_00086_M._grisea  | .....LGQLAGV..... | .....VDKMY..... | .....LMAYDYAG.....  |     |     |     |
| MGG_07927_M._grisea  | .....IAGMDPL..... | .....LDFWN..... | .....LMAYDYAG.....  |     |     |     |
| Chi18_6_H._jecorina  | .....MPAIDRY..... | .....LDAWH..... | .....LMAYDYAG.....  |     |     |     |
| Chi18_5_H._jecorina  | .....MADLGQV..... | .....LDYVN..... | .....LMXYDYAG.....  |     |     |     |
| Chi18_7_H._jecorina  | .....VAGMDQY..... | .....LDFWN..... | .....LMAYDYAG.....  |     |     |     |
| 04883_N._crassa      | SS...MKEIGET..... | .....LDFMN..... | .....LMAYDYAG.....  |     |     |     |
| 04554_N._crassa      | .....LPGMDRY..... | .....LDFWN..... | .....LMAYDYAG.....  |     |     |     |
| 11407_B._fuckeliana  | .....LADMDKY..... | .....LDSWH..... | .....LMAYDYAG.....  |     |     |     |
| 05350_B._fuckeliana  | .....IYGMNQY..... | .....LDFWN..... | .....LMAYDYAG.....  |     |     |     |
| 11700_S._sclerotioru | .....MADMDKY..... | .....LDSWH..... | .....LMAYDYSG.....  |     |     |     |
| 11304_S._sclerotioru | .....VRSMNEY..... | .....LDFWN..... | .....LMAYDYAG.....  |     |     |     |
| 08020_S._sclerotioru | .....LSEMDQY..... | .....VDFWN..... | .....FMAYDYSG.....  |     |     |     |
| 01250_A._capsulatum  | .....MAEMDVH..... | .....LDFWN..... | .....MMCXYDFAG..... |     |     |     |
| 05886_A._capsulatum  | .....LEEMTPY..... | .....LDFYN..... | .....LMAYDYAG.....  |     |     |     |
| 06565_A._capsulatum  | .....LAEMTPY..... | .....LDFYN..... | .....LMAYDYSG.....  |     |     |     |
| 05250_C._immitis     | .....MAEMDPY..... | .....LDFWN..... | .....LMCYDFAG.....  |     |     |     |
| 02795_C._immitis     | .....LAEMDKY..... | .....LDFWN..... | .....LMAYDFSAG..... |     |     |     |
| 03822_C._immitis     | .....LKEMGQD..... | .....LDFIN..... | .....IMAYDYAG.....  |     |     |     |
| AN5454_E._nidulans   | .....LSSMDRY..... | .....LDFWN..... | .....LMAYDYSAG..... |     |     |     |
| AN4871_E._nidulans   | .....LQEMTPY..... | .....LDFYN..... | .....LMAYDYAG.....  |     |     |     |
| 00269_P._nodorum     | .....LGAMDKY..... | .....LDFWN..... | .....LMAYDYAG.....  |     |     |     |
| 04870.1_C._cinereus  | .....VAEMDQY..... | .....LDFWN..... | .....LMAYDYSAG..... |     |     |     |
| 09921.1_C._cinereus  | .....VAQMDRA..... | .....MDYWN..... | .....LMAYDYAG.....  |     |     |     |
| 124149_P._chrysospor | .....VREMDAV..... | .....LDFWN..... | .....MMAYDFSAG..... |     |     |     |
| 134311_P._chrysospor | .....VPQMDKA..... | .....LSYWN..... | .....LMAYDYAG.....  |     |     |     |
| 03412_F._neoformans  | .....VREMDQV..... | .....LDFWN..... | .....LMAYDFAG.....  |     |     |     |
| 13635_R._oryzae      | .....LREMOPY..... | .....VDLFY..... | .....LMAYDYAG.....  |     |     |     |
| UM04261_U._maydis    | .....VAKMDQY..... | .....LDFWN..... | .....LMAYDFAG.....  |     |     |     |
| EAA69503_G._zeae     | .....LMEIAEY..... | .....LDFIN..... | .....LMAYDFFG.....  |     |     |     |
| EAA70860_G._zeae     | .....LPVVAHL..... | .....LDFLN..... | .....LMGYDFTG.....  |     |     |     |
| Chi18_3_H._jecorina  | .....LARAAEY..... | .....LDYIN..... | .....LVAYDFFG.....  |     |     |     |
| Chi18_2_H._jecorina  | .....LDAVSRI..... | .....IDYLN..... | .....LMAYDFTG.....  |     |     |     |
| 03026_N._crassa      | .....VRQAAEY..... | .....LDSIN..... | .....LMAYDYFG.....  |     |     |     |
| 01594_B._fuckeliana  | .....LYKAQDY..... | .....LDLIN..... | .....LMAYDFHG.....  |     |     |     |
| 05897_S._sclerotioru | .....LYKAQDY..... | .....LDLIN..... | .....LMAYDFSAG..... |     |     |     |
| 04742_A._capsulatum  | .....LVEAHLY..... | .....VDLIN..... | .....LMTYDFSAG..... |     |     |     |



|                      |                    |            |                |
|----------------------|--------------------|------------|----------------|
| 04750_C._immitis     | .....LIHAQCY.....  | VDLIN..... | LMTYDFSG.....  |
| 04719_P._nodorum     | .....LGHAAPHY..... | LDMIN..... | LMAYDYSG.....  |
| MGG_08458_M._grisea  | .....LGRAAAL.....  | LDMLN..... | LMSYDFSG.....  |
| CHT4_C._albicans     | .....IQEMDKY.....  | LTFWN..... | LMCYDFAGE..... |
| 01119_L._elongisporu | .....IKVMDQY.....  | LSFWN..... | LMAYDFSGL..... |
| XP_454053_K._lactis  | .....ISEMSKY.....  | VDIWN..... | MMCYDFHGE..... |
| CTS2_S._cerevisiae   | .....ITEIDQY.....  | VDYWN..... | MMTYDYYGS..... |
| 246746_L._bicolor    | .....VADMDSK.....  | LDFTN..... | MMSYDFSG.....  |
| 03209_N._crassa      | .....LPGMNPY.....  | IDSWH..... | LMAYDYAG.....  |
| 14474_P._nodorum     | .....MKEMDQY.....  | VDNWN..... | LMAFDYQGG..... |
| CE06282_C._elegans   | .....LNKIIES.....  | VDFIN..... | AYSTDYYT.....  |
| CE03547_C._elegans   | .....IENIFDN.....  | VDFLN..... | IFTMGYFG.....  |
| CE03542_C._elegans   | .....LDEIIDH.....  | IDFMN..... | VYSMDYSG.....  |
| CE15845_B_C._elegans | .....LDDIPEH.....  | VDYIN..... | VYSMEKFS.....  |
| CE02997_C._elegans   | .....LVEFSNF.....  | VDFLN..... | IYLFNSF.....   |
| CE36953_C._elegans   | .....LQQLMKY.....  | CDFVN..... | VMSYDYFG.....  |
| YP_432439_H._chejue  | .....VMQITPY.....  | LDYVN..... | IMTYDLHG.....  |
| YP_529449.1_S._degra | .....AFEATQY.....  | LDYVN..... | IMSYDLHG.....  |
| YP_077582_B._licheni | .....TFKPLRY.....  | VDYVN..... | IMSYDLHG.....  |
| ChiI_S._coelicolor   | .....TFQVQKY.....  | LDYVN..... | IMSYDLHG.....  |
| NP_902986_C._violace | .....TFQGLKY.....  | LDFTN..... | VMSYDLHG.....  |
| ZP_01159608_Photobac | .....TFDVTKY.....  | LDYVN..... | IMSYDLHG.....  |
| ZP_01234708_V._angus | .....TFDVTKY.....  | LDYVN..... | IMSYDLHG.....  |
| NP_233087_V._cholera | .....TFDVTKY.....  | LDYVN..... | IMSYDLHG.....  |
| NP_230718_V._cholera | .....DFAMQDV.....  | LDYVN..... | IMSYDLHG.....  |
| AAO07185_V._vulnific | .....TFDVTKY.....  | LDYVN..... | IMSYDLHG.....  |
| ZP_01354150_C._phyto | ET.FGIKEVSNT.....  | VDYIN..... | LMAYDYVG.....  |
| ZP_01246933_F._johns | ES.IDWKAVAPF.....  | VNRIN..... | IMSYDLVN.....  |
| YP_012734_L._monocyt | NG.IDVANLFKV.....  | VDFAN..... | VMTYDLNG.....  |
| YP_529337.1_A_S._deg | ....KLAAIVEQ.....  | LDFTN..... | LMTYDLNG.....  |
| ChiA_A_P._kodakarae  | R..IDWVEASKY.....  | LDSIN..... | IMTYDYHG.....  |
| AAG19274_Halobacteri | G..LDHAANAFA.....  | LDFTN..... | VMTYDYHG.....  |
| AAG19275_Halobacteri | L..INHREVAHV.....  | VDDIY..... | MMAYDFTG.....  |
| CE03543_C._elegans   | .....LEEIMEH.....  | VDFMN..... | VYSMDYSG.....  |
| CE34961_C._elegans   | .....FDDFMEY.....  | IDFTN..... | VFSMDYYG.....  |
| CE20043_C._elegans   | .....LRTISSH.....  | VDFFN..... | VHSMYYG.....   |
| CE15845_A_C._elegans | .....LDEIIEH.....  | VDFLN..... | VHSMDFAG.....  |
| CE32863_A_C._elegans | .....LDEIIEH.....  | VDFLN..... | VHSMDFAG.....  |
| CE03544_C._elegans   | .....LDAIQKH.....  | VDFIN..... | VHSMYAK.....   |
| CE08731_C._elegans   | .....IEEIIIRH..... | VDFVN..... | VYSMDYAG.....  |
| CE28638_C._elegans   | .....IPDILKY.....  | VDFVN..... | VFTMDYYG.....  |
| CE32863_B_C._elegans | .....LDDIPEH.....  | VDYIN..... | VYSMEKFS.....  |
| CE01673_C._elegans   | .....LED.QEN.....  | ADSIN..... | LISMAEYE.....  |
| CE02993_C._elegans   | .....FEDFLKF.....  | VDFFN..... | IYSTQFR.....   |
| CE02996_C._elegans   | .....LKDFSKE.....  | VDFFN..... | IYSTQFR.....   |
| CE02995_C._elegans   | .....LMGFSKE.....  | VDFFN..... | IYSIHYQ.....   |
| CE02992_C._elegans   | .....LKLLMNH.....  | IDFTN..... | VLSINYFE.....  |
| CE02999_C._elegans   | .....WTEILEN.....  | VDFIN..... | VITFEYFY.....  |
| CE02998_C._elegans   | .....MDGLLHY.....  | VDFLN..... | VLTYGYAA.....  |
| CE09229_C._elegans   | .....LKGILKY.....  | ADFTN..... | VMTYDYYG.....  |
| CE12928_C._elegans   | .....LKGILNY.....  | ADFTN..... | VMTYDYYG.....  |
| CE23907_C._elegans   | .....FKQLVQD.....  | VDFVN..... | IYSMDYYG.....  |
| CE32917_C._elegans   | .....IENIVAV.....  | ADFTN..... | IYSMDYYG.....  |
| CE34579_C._elegans   | .....MNEIVEN.....  | VDFIN..... | IFAMDYYG.....  |
| CE25073_C._elegans   | .....IENIFDN.....  | VDFLN..... | IFTMGYFG.....  |
| CE03548_C._elegans   | .....ITSIVNN.....  | VDFLN..... | IFTMGYFG.....  |
| NP_469498_L._innocua | NG.VDVANLFKV.....  | VDFAN..... | VMTYDLNG.....  |
| CE08730_C._elegans   | .....IEEIIER.....  | VDFVN..... | VYSMNYYA.....  |
| Q8U1H4_P._furiosus   | .....H.....        | VDFFN..... | VYSMDYAG.....  |
| CE12474_C._elegans   | .....LVEFLNS.....  | VDFFG..... | IYLFNSY.....   |
| CE02990_C._elegans   | .....MNNIVQI.....  | VDFIN..... | VFSLDYYG.....  |

|                      |                                |             |                |
|----------------------|--------------------------------|-------------|----------------|
| CE40296_C._elegans   | .....LV <del>E</del> FSNF..... | VDFIN.....  | IYSFNSY.....   |
| ChiB_S._marcescens   | ....KLAQIVAP.....              | LDYIN.....  | LMTYDLAG.....  |
| O10363_O._pseudotsug | V..VKYDAAQRF.....              | LDKIF.....  | LMSYDFKG.....  |
| AAP29899_C._fumifera | V..VQYDVAQKL.....              | LDKIF.....  | LMSYDFKG.....  |
| AAV73807_B._mori_NPV | V..VNYAEAQKS.....              | LDKIF.....  | LMTYDFKG.....  |
| AAL56186_H._zea_SNPV | A..VNYDRAQQY.....              | LDKIF.....  | VMSYDFKG.....  |
| AAF33549_S._exigua_N | V..VNYTEAQKY.....              | LDTIF.....  | LMTYDFKG.....  |
| AAZ38189_A._segetum_ | V..VNYTEAQKY.....              | LDTIF.....  | LMTYDFKG.....  |
| AAS82706_A._segetum_ | I..VNYENAEY.....               | LDHIF.....  | VMTYDFKG.....  |
| ZP_01159013_Photobac | D..VDYGEAIQY.....              | MDYIF.....  | AMTYDFYF.....  |
| ZP_01161077_Photobac | R..VDYNQAQQY.....              | MDHIF.....  | LMSYDMFG.....  |
| ZP_01159325_Photobac | ...IDWVAVAPH.....              | LTNMF.....  | AMTYDYL.....   |
| ZP_01160869_Photobac | G..IDWKKVSQD.....              | LDQIF.....  | LMSFDLFG.....  |
| ZP_01233025_V._angus | D..VDYGEAIQY.....              | MDYIF.....  | AMTYDFYF.....  |
| ZP_01236284_V._angus | R..VDYNQAQQY.....              | MDHIF.....  | LMSYDMFG.....  |
| ZP_01235109_V._angus | ...IDWAAVAPH.....              | LTNMF.....  | AMTYDYL.....   |
| ZP_01235465_V._angus | G..IDWKKVSQD.....              | LDQIF.....  | LMSFDLFG.....  |
| AAO08114_V._vulnific | D..VNYADAIQY.....              | MDYIF.....  | AMTYDFYF.....  |
| AAO07498_V._vulnific | ...IDWKAAPY.....               | LTNMF.....  | AMTYDFLFG..... |
| NP_232428_V._cholera | D..VNYGQAVQY.....              | MDYIF.....  | AMTYDFYF.....  |
| YP_432951_H._chejuen | L..IDWPAAPHY.....              | MDRLY.....  | VMTYDLTG.....  |
| YP_529337.1_B_S._deg | A..VDYASATTY.....              | MDYIF.....  | LMSYDYM.....   |
| YP_435912_H._chejuen | S..VNYSTAVQY.....              | MDYVF.....  | AMTYDYY.....   |
| ZP_01137509_A._cellu | L..IQTDKIGQY.....              | LDFA.....   | VMTYDMHG.....  |
| ChiE_S._coelicolor   | AG.WDLTRIFDS.....              | LDYAN.....  | VQGYDFHSGSD    |
| ChiC_S._coelicolor   | A..ADYGEASKY.....              | IDWYN.....  | VMTYDFFG.....  |
| ChiD_S._coelicolor   | A..ADYAGAAQY.....              | VDWYN.....  | PMTYDFFG.....  |
| NP_903910_C._violace | N..TEPAAAYSSY.....             | LDWIN.....  | VMTYDFHG.....  |
| YP_529072.1_S._degra | A..ADYGGAAQY.....              | LD FYM..... | LMTYDFFG.....  |
| ZP_01431615_S._tropi | A..ADYAGAAPN.....              | LDWIM.....  | AMTYDYF.....   |
| ZP_01136287_A._cellu | L..LEVPOISRL.....              | LDQMD.....  | VMDYDFHG.....  |
| 01315.1_C._cinereus  | ....VAAFAKL.....               | LDYIA.....  | IMNYDLWG.....  |
| 03252.1_C._cinereus  | ....VSGFAEV.....               | LDYIA.....  | VMNYDVPV.....  |
| 05285.1_C._cinereus  | ....MSGFAEV.....               | LDHLA.....  | IMAYDIHG.....  |
| 05291.1_C._cinereus  | ....VSGFAEV.....               | FD FIA..... | IMAYDVWG.....  |
| 01586.1_C._cinereus  | ....VSEFAAI.....               | MNYIC.....  | IMNYDVWG.....  |
| 128098_P._chrysospor | ....VSGFAKV.....               | LDYIA.....  | IMDYDVFGP..... |
| 39872_P._chrysospori | ....VSGFSKV.....               | LD FIT..... | IMNYDVWG.....  |
| 138098_P._chrysospor | ....VSPFAAV.....               | LDYVT.....  | LM DYDVWG..... |
| 129436_P._chrysospor | ....ASAFAQV.....               | LDWIL.....  | IMNYDTWG.....  |
| EAA71245_G._zeae     | ....LGGFADV.....               | LDYLM.....  | IMNYDLYG.....  |
| MGG_04732_M._grisea  | G..ALKPMGDL.....               | LDYSI.....  | IMGYDVFG.....  |
| UM06190_U._maydis    | ....VARAAAA.....               | MDYIM.....  | IMNYDVWG.....  |
| 04245_F._neoformans  | ....VSEFAKV.....               | LDWIL.....  | IMNYDVWG.....  |
| 16170_R._oryzae      | ....FEPDWVTN.....              | VDYFY.....  | LMSY EYNG..... |
| 01334_R._oryzae      | ....FESGWVSD.....              | VDYFY.....  | LMSY EYNG..... |
| 13934_R._oryzae      | ....LDDGWSKY.....              | MDAFY.....  | IMAYDLNG.....  |
| 07611_R._oryzae      | ....ASGFVPY.....               | VDRFH.....  | VMTFDVNG.....  |
| 10252_R._oryzae      | ....VKEFVPY.....               | FDHVN.....  | IMTYDMNG.....  |
| 14659_R._oryzae      | ....VSGFAKV.....               | LD RVN..... | VMTYDING.....  |
| 231399_L._bicolor    | ....MSGFSVV.....               | LN FIS..... | VMNYDVWG.....  |
| 180319_L._bicolor    | ....VSAFADS.....               | LDWIS.....  | LMVYDVWG.....  |
| 191848_L._bicolor    | ....VSAFAEY.....               | LDWIA.....  | IMAYDVWG.....  |
| 317003_L._bicolor    | ....VSAYAAQ.....               | MNFVN.....  | IMNYDVWG.....  |
| 246840_L._bicolor    | ....VSAFGDV.....               | LDYIT.....  | VMNYDTGS.....  |
| 144643_L._bicolor    | ....VSDFADS.....               | LDWVL.....  | IMNYDVWG.....  |
| 310136_L._bicolor    | ....VSAFADV.....               | LDHIA.....  | IMNYDVWG.....  |
| 629882_M._xanthus    | ....WFTNLVPY.....              | LDQMN.....  | VMTYEMTGP..... |
| 630509_A_M._xanthus  | .....                          | .....       | .....          |
| YP_592598_Acidobacte | ....VPALAPL.....               | LD FIN..... | VMTYDFTG.....  |
| YP_446903_S._ruber   | AH.TNMAAAHTP.....              | LDYVN.....  | LMTYDFHG.....  |
| ZP_00739282_B._thuri | H..TELKKISQI.....              | LDWIN.....  | IMTYDFHG.....  |

|                      |                                                            |                |
|----------------------|------------------------------------------------------------|----------------|
| ZP_01245639_F._johns | KQYLGPNNRAQYGMTEDISTYCDYIT.....                            | YFGYDFGG.....  |
| NP_976824_B._cereus  | H...TELKKISQI.....LDWIN.....                               | IMTYDFHG.....  |
| YP_077581_B._licheni | N...TELDKIAQT.....VDWIN.....                               | IMTYDFNG.....  |
| 631138_M._xanthus    | NK.QETKKLSDV.....LDWIN.....                                | VMSYDYHG.....  |
| ZP_01247029_F._johns | .....SSTFAA.....YDWIN.....                                 | IMAYDATGP..... |
| ZP_01234549_V._angus | .....YLDVALNA.....FDTVH.....                               | LMTYDMQN.....  |
| ZP_01160697_Photobac | .....YLDVALNA.....FDTVH.....                               | LMTYDMQN.....  |
| ZP_01158584_Photobac | DF..YMDEALDV.....FDTVN.....                                | LMTYDMRN.....  |
| AN0549_E._nidulans   | .....IVKLQKS.....VDFFN.....                                | IMSYDLHG.....  |
| AN8481_E._nidulans   | .....IINLQDH.....VDFFN.....                                | IMSYDLHG.....  |
| AN9390_E._nidulans   | .....IKNMEPI.....LDWFN.....                                | IMSYDLHG.....  |
| AN0517_E._nidulans   | .....VDRMQKY.....VDYFN.....                                | LMSYDLHG.....  |
| AN0541_E._nidulans   | .....VSAMEKE.....VSWFN.....                                | LMSYDMRG.....  |
| AN5077_E._nidulans   | .....LKAMMEY.....VDWVN.....                                | LMSYDLHG.....  |
| AN0509_E._nidulans   | .....INSISKV.....VDYIV.....                                | FMTYDLHG.....  |
| AN7613_E._nidulans   | .....IEMWQH.....VDYLI.....                                 | YMTYDFHG.....  |
| 07035_N._crassa      | .....IVNLEKY.....VDWFN.....                                | VMSYDMHG.....  |
| 07484_N._crassa      | .....IAQISKV.....VDYIV.....                                | LMCYDLHG.....  |
| 05317_N._crassa      | .....LKQIGAV.....VDYIV.....                                | YMSYDGHG.....  |
| EAA74768_G._zeae     | .....IKKLERT.....VDFFN.....                                | IMSYDLHG.....  |
| EAA78168_G._zeae     | .....LDNIEPS.....VDWFN.....                                | VMSYDLHG.....  |
| EAA75711_G._zeae     | .....AKAMEPY.....VDFFG.....                                | FMAYDLHG.....  |
| EAA68447_G._zeae     | .....IKDIGKV.....VDYIV.....                                | YMTYDLHG.....  |
| EAA77156_G._zeae     | .....VTQIAPL.....VDYIV.....                                | YMTYDLHG.....  |
| 12510_S._sclerotioru | .....LKALAKS.....VSWFN.....                                | VMSYDLHG.....  |
| 00773_S._sclerotioru | .....LISIEPS.....VDWFN.....                                | YMAYDLHG.....  |
| 05454_S._sclerotioru | .....IKASAEA.....ADFN.....                                 | IMAYDLHG.....  |
| 00677_S._sclerotioru | .....PINLEPY.....TTFFN.....                                | FMSYDLHG.....  |
| 02128_S._sclerotioru | .....ILELSLI.....VDYVI.....                                | YMTYDLHG.....  |
| MGG_04534_M._grisea  | .....LQKIEPH.....LDFFN.....                                | VMTYDIHG.....  |
| MGG_01336_M._grisea  | .....MQAMHPY.....LDTIG.....                                | LMSYDLRS.....  |
| 14527_P._nodorum     | .....LAGLQPN.....VDWFN.....                                | LMSYDLHG.....  |
| 15411_P._nodorum     | .....LKGLEAQ.....VDWLS.....                                | ILTYDLHG.....  |
| 02214_P._nodorum     | .....LKA.VDY.....VDFVN.....                                | MMTYDLHG.....  |
| 04761_C._immitis     | .....LKGMEY.....VDWFN.....                                 | VMTYDIHG.....  |
| 04323_A._capsulatum  | .....PINLEPY.....INFFN.....                                | FMSYDLHG.....  |
| 00533_B._fuckeliana  | .....ILALSFV.....VDYIV.....                                | YMTYDLHG.....  |
| Chi18_1_H._jecorina  | .....VKDMAKY.....VDYFI.....                                | YMTYDLHG.....  |
| Chi18_8_H._jecorina  | .....EKASRSS.....S.....                                    | LG.....        |
| Chi18_10_H._jecorina | .....IADIKT.....VDYIV.....                                 | YMTYDLHG.....  |
| 02650_A._capsulatum  | .....LPSILES.....VDFFN.....                                | IMTYDLMN.....  |
| AN0221_E._nidulans   | .....IPSIAS.....VDFLN.....                                 | VMTYDLMN.....  |
| 06020_N._crassa      | .....VPRIMRH.....VDFLN.....                                | VMTYDMMN.....  |
| EAA76014_G._zeae     | .....VPRIMKE.....VNFLN.....                                | IMSYDLMN.....  |
| Chi18_4_H._jecorina  | .....VPSIVEH.....VDFIN.....                                | LMTYDMMN.....  |
| 09277_P._nodorum     | .....IPRIMES.....IDFLN.....                                | VMTYDMMN.....  |
| 05838_A._capsulatum  | .....GPAIWES.....VDFVNVLFNSNKPSTLTTFERMLTVLFKIMTYDLIN..... |                |
| EAA69039_G._zeae     | .....APLINKY.....VDFVN.....                                | VMTYDLMN.....  |
| MGG_06594_M._grisea  | .....VPKINAA.....VDFIN.....                                | VMAYDLMN.....  |
| Chi18_11_H._jecorina | .....VAKINGI.....VNYVN.....                                | IMTYDLMN.....  |
| 02644_A_P._nodorum   | .....GPKIWRS.....VDFIN.....                                | VMSYDLMN.....  |
| AN9447_E._nidulans   | .....GPKIWPS.....VDMIN.....                                | IMSYDLMN.....  |

|                      | 490                                                         | 500      | 510            | 520 | 530 | 540 |
|----------------------|-------------------------------------------------------------|----------|----------------|-----|-----|-----|
| NP_979924_B._cereus  | .... .... .... .... .... .... .... .... .... .... .... .... | QGG..... | PPMAISPIG..... |     |     |     |
| YP_077302_B._licheni | .... .... .... .... .... .... .... .... .... .... .... .... | SGG..... | PPMAVSPIG..... |     |     |     |
| YP_091539_B._licheni | .... .... .... .... .... .... .... .... .... .... .... .... | GTS..... | EPGPIAPIN..... |     |     |     |
| YP_079121_B._licheni | .... .... .... .... .... .... .... .... .... .... .... .... | GTS..... | EPGPIAPIN..... |     |     |     |
| YP_074366_S._thermop | .... .... .... .... .... .... .... .... .... .... .... .... | SGG..... | PPMAVSPID..... |     |     |     |
| YP_075811_S._thermop | .... .... .... .... .... .... .... .... .... .... .... .... | VTG..... | PPMAIAPLR..... |     |     |     |

|                      |                  |                     |                |           |
|----------------------|------------------|---------------------|----------------|-----------|
| YP_075619_S._thermop | .WG.....         | LPHGVPASLP.....     |                |           |
| ZP_01354047_C._phyto | .TYS.....        | EPMAVAPIN.....      |                |           |
| ZP_01354926_C._phyto | .SKS.....        | EEAGSVASIG.....     |                |           |
| NP_902406_C._violace | .PA.....         | WDPGPVAGSD.....     |                |           |
| ZP_01136704_A._cellu | .AGSA.....       | YPGGPISSIS.....     |                |           |
| ZP_00526542_S._usita | .RNT.....        | PPGPVAGMT.....      |                |           |
| AAF46212.1_D._melano | .YRE.DTPFTG..... | LNAPLYARSQ.....     | ER.....        | S         |
| AAF46534.1_D._melano | .PER.NNEVAD..... | FPAPIYELNE.....     |                |           |
| AAF46544.1_D._melano | .SHE.PS..VN..... | HHAPLYSLEEDSEY..... |                | N         |
| At4g19720_A._thalian | .S...ST.TIG..... | PPAALFDPSN.....     |                |           |
| At4g19750_A._thalian | .PGW.SP.VTG..... | PPAALFDPSN.....     |                |           |
| EAA67655_G._zeae     | .PWDST.....      | TGHQANVFAS.....     | RKSP.....      | LAT       |
| EAA73155_G._zeae     | .AWSAF.....      | SGHQANKYAN.....     | AKIP.....      | NAT       |
| EAA74986_G._zeae     | .SWDSA.....      | SGHNANLFPY.....     | KAST.....      | N         |
| EAA74223_G._zeae     | .SWDQT.....      | AGHQANLYPS.....     | HDNP.....      | VST       |
| MGG_05533_M._grisea  | .SWDNT.....      | TGHQANVYPG.....     | PD.....        | LTT       |
| MGG_01247_M._grisea  | .SWDTT.....      | TGHQSNLYLD.....     | DQNK.....      | VAT       |
| MGG_00086_M._grisea  | .AWDAT.....      | SGHQANLFPS.....     | GSNP.....      | TST       |
| MGG_07927_M._grisea  | .SWDQT.....      | AGHQANLFPS.....     | HGNP.....      | TST       |
| Chi18_6_H._jecorina  | .SWDDL.....      | SGDQSNVFHD.....     | ATNP.....      | HRT       |
| Chi18_5_H._jecorina  | .SWSNA.....      | SGHDANLYHN.....     | PQNP.....      | NAT       |
| Chi18_7_H._jecorina  | .SWDQT.....      | SGHQANLHPS.....     | YDNP.....      | AST       |
| 04883_N._crassa      | .AWDKK.....      | AGHQANLYPD.....     | EKNP.....      | DTT       |
| 04554_N._crassa      | .SWDQV.....      | AGHQANLFHC.....     | NSNP.....      | AAT       |
| 11407_B._fuckeliana  | .SWDNV.....      | TGHMANLNPS.....     | VNNN.....      | SST       |
| 05350_B._fuckeliana  | .SWDGV.....      | AGHQANVLAS.....     | HNNP.....      | SST       |
| 11700_S._sclerotioru | .SWDNT.....      | TAHNANLYPS.....     | VLNP.....      | KST       |
| 11304_S._sclerotioru | .SWDSV.....      | AGHQANLHPS.....     | ESNP.....      | DST       |
| 08020_S._sclerotioru | .PWSTV.....      | SAHQANLSPS.....     | GNG.....       | ST        |
| 01250_A._capsulatum  | .SWDSK.....      | AGHMANVFPS.....     | KSVP.....      | EST       |
| 05886_A._capsulatum  | .SWDTV.....      | AGHQANLEVS.....     | KSDP.....      | KST       |
| 06565_A._capsulatum  | .SWDTI.....      | AGHQSNIEPS.....     | KSNP.....      | KST       |
| 05250_C._immitis     | .SWDST.....      | AGHMANVFPS.....     | QSSP.....      | EST       |
| 02795_C._immitis     | .SWDKV.....      | SGHMSNVFPS.....     | TTKP.....      | EST       |
| 03822_C._immitis     | .SWSTM.....      | AGHQANLRPS.....     | MSNP.....      | QST       |
| AN5454_E._nidulans   | .SWDTI.....      | TGHMANLFAS.....     | RQNP.....      | AST       |
| AN4871_E._nidulans   | .SWDQT.....      | AGHQANLYPS.....     | TSNP.....      | TST       |
| 00269_P._nodorum     | .SWDAN.....      | AGHQANFNPS.....     | GNNA.....      | IST       |
| 04870.1_C._cinereus  | .SWDRT.....      | ANHQANLLG.....      | P.....         |           |
| 09921.1_C._cinereus  | .SWLTW.....      | ADNQANFYGG.....     | AR.....        | T         |
| 124149_P._chrysospor | .SWDSI.....      | ANHQANLFG.....      | G.....         |           |
| 134311_P._chrysospor | .SWLTY.....      | ADNQANLYGG.....     | AR.....        | T         |
| 03412_F._neoformans  | .SWDSV.....      | AGHQANLYSD.....     | KP.D.....      |           |
| 13635_R._oryzae      | .SWDRV.....      | AGHQAAVFG.....      | G.....         |           |
| UM04261_U._maydis    | .SWSAL.....      | TGHQANLWNI.....     | KG.A.....      |           |
| EAA69503_G._zeae     | .SWTPK.....      | AGHHAQLYAM.....     | DK.....        | EET       |
| EAA70860_G._zeae     | .GWTDV.....      | CGHHAQLLPP.....     | S.QNLN.....    | EVYPTL    |
| Chi18_3_H._jecorina  | .TWTSK.....      | SGHHAQLYTL.....     | NK.....        | DEP       |
| Chi18_2_H._jecorina  | .SWTKV.....      | CGNHAQLCSP.....     | G.TRLQ.....    | STHPCL    |
| 03026_N._crassa      | .SWSHR.....      | SGHHSQLYAM.....     | NK.....        | EEA       |
| 01594_B._fuckeliana  | .SWSQK.....      | SGHHAQLYPG.....     | NM.....        | PDA       |
| 05897_S._sclerotioru | .SWSHK.....      | SGHHAQLYPG.....     | NL.....        | QDA       |
| 04742_A._capsulatum  | .PWMPL.....      | SGHHAQLYAP.....     | PDPQKAAL       | EATATTTST |
| 04750_C._immitis     | .PWTPH.....      | SGHQSQLFSP.....     | HTPH.....      | SEAA      |
| 04719_P._nodorum     | .PWTSK.....      | CGHQAQLFTP.....     | QIPH.....      | SPEA      |
| MGG_08458_M._grisea  | .PWAKV.....      | SAHHAQLRHP.....     | QPARLPP.....   | QADGCL    |
| CHT4_C._albicans     | .GWSSK.....      | TAFHSNLFNG.....     | N.....         | GDN       |
| 01119_L._elongisporu | .GWSEK.....      | VGYHSNLFNG.....     | N.....         | GDN       |
| XP_454053_K._lactis  | .WSDV.....       | TGYHSNLYLQ.....     | GHSRRSLSN..... | RISNS     |
| CTS2_S._cerevisiae   | .WSET.....       | TGYHSNLF.....       |                | SET       |
| 246746_L._bicolor    | .SWDSI.....      | ANHQANIYG.....      | G.....         |           |
| 03209_N._crassa      | .SWDST.....      | TGHQANLLPS.....     | PKNL.....      | LTT       |



|                      |                                                         |
|----------------------|---------------------------------------------------------|
| 14474_P._nodorum     | .GFSNF.....TGHQSNVYAS.....KTNP.....KTTDGWDSVLG          |
| CE06282_C._elegans   | .PLADNLSLSD.....DIAGPSAPIYFGAQ.....                     |
| CE03547_C._elegans   | .PWQNDAG.....MITGAASQLFNGVNGVP.....                     |
| CE03542_C._elegans   | .PWDNKWG.....TPTGPSAPMNYNIG.....                        |
| CE15845_B_C._elegans | ....S.....LIGP.LPLYSGHEP.....                           |
| CE02997_C._elegans   | .....L.....NQIGPDSPLYGGGSR.....                         |
| CE36953_C._elegans   | .AWASKWG.....AYTGPPAPLQFAMPKKF.....                     |
| YP_432439_H._chejuen | .AWN.....QFVGPNAALYDTGEDV.....                          |
| YP_529449.1_S._degra | .AWN.....QFVGPNAALFDNGQDA.....                          |
| YP_077582_B._licheni | .AWN.....EFVGPNASLFDNGEDA.....                          |
| ChiI_S._coelicolor   | .AWN.....EYVGPNASLFDGGRDA.....                          |
| NP_902986_C._violace | .AWN.....RFVGPNAALYDDGKDA.....                          |
| ZP_01159608_Photobac | .AWN.....DHVGHNAALFDTGKDS.....                          |
| ZP_01234708_V._angus | .AWN.....DHVGHNAALFDTGKDS.....                          |
| NP_233087_V._cholera | .AWN.....DHVGHNAALYDTGKDS.....                          |
| NP_230718_V._cholera | .TWN.....EFVGPQAALFDGKDA.....                           |
| AAO07185_V._vulnific | .AWN.....DHVGHNAALYDTGDS.....                           |
| ZP_01354150_C._phyto | .PWSR.....VTGHHSNLMCE.....KEAPN.....                    |
| ZP_01246933_F._johns | .GYSK.....VTGHTPLYST.....N.....PK.....                  |
| YP_012734_L._monocyt | .AWTP.....NSAHTTALYGN.....PKDPN.....                    |
| YP_529337.1_A_S._deg | .PWNGVTK.....TNFHAHLYGNQEPFRFYNALREADLG.....LTWEEIVERFP |
| ChiA_A_P._kodakarae  | .AWETI.....TGH LAPLYC.....D.....PNAPYTDENV.....         |
| AAG19274_Halobacteri | .AFNDY.....TNHQAPLYG.....T.....EADPSPNAD.....           |
| AAG19275_Halobacteri | .VWHGT.....AGLNAPIYG.....T.....PPDYPPSGD.....           |
| CE03543_C._elegans   | .PWDNQWG.....TPTGPSAPLAFNIG.....                        |
| CE34961_C._elegans   | .PWPNQWG.....TPTGPSAPLYGGIG.....                        |
| CE20043_C._elegans   | .PWPNEWG.....KPTGPISPLY.....G.....                      |
| CE15845_A_C._elegans | .PWANQYG.....VPTGPSAPMC.....                            |
| CE32863_A_C._elegans | .PWANQYG.....VPTGPSAPMCGGFG.....                        |
| CE03544_C._elegans   | .PLPNQWG.....TPTGPSASMNFNIG.....                        |
| CE08731_C._elegans   | .PWDNQWG.....TPTGPSAPLYGGLD.....                        |
| CE28638_C._elegans   | .PSD...G.....STGPLSPLYSG.....                           |
| CE32863_B_C._elegans | ....S.....LIGP.LPLYSGHEP.....                           |
| CE01673_C._elegans   | .N.....QLFGSGGVIRISEA.....                              |
| CE02993_C._elegans   | .....E.....KQVGPDSPLYGGEGR.....                         |
| CE02996_C._elegans   | .....E.....KQVGPDSPLYGGEGR.....                         |
| CE02995_C._elegans   | .....S.....RQVGPPSSPLYGGGSR.....                        |
| CE02992_C._elegans   | .PLP.GN.G.....ANIGPISPLYGGQRG.....                      |
| CE02999_C._elegans   | .....E.A.....NKIGPISPLYGGSFG.....                       |
| CE02998_C._elegans   | .PWSGVN.G.....KFVGPNAPLYGGNRE.....                      |
| CE09229_C._elegans   | .AWESKW.G.....AYTGTAPPLYFGSLKG.....                     |
| CE12928_C._elegans   | .AWESKW.G.....AYTGTAPPLYFGSLKG.....                     |
| CE23907_C._elegans   | .PWPDDLAG.....DTTGPSAPIFGCPW.....                       |
| CE32917_C._elegans   | .PWKNPYG.....NPTGPISPIYNGAQ.....                        |
| CE34579_C._elegans   | .PWASGWG.....NPTGPISPIYGGSE.....                        |
| CE25073_C._elegans   | .PWQNDAG.....MITGAASQLFNGVNGVP.....                     |
| CE03548_C._elegans   | .PWPNPKG.....MITGATSQLFYGVNGVL.....                     |
| NP_469498_L._innocua | .AWTP.....NSAHTTALYGN.....PKDPN.....                    |
| CE08730_C._elegans   | .PWSNQWG.....TPTGPSAPLYGGLD.....                        |
| Q8U1H4_P._furius     | .....                                                   |
| CE12474_C._elegans   | .PWPNQWG.....VPTGPSSPMFYNIG.....                        |
| CE02990_C._elegans   | .....S.....YQVGPDSPLYGGGSR.....                         |
| CE40270_C._elegans   | .PTQNDFG.....KITGPTAPMFNGVP.....                        |
| CE40296_C._elegans   | .....L.....YQVGPDSPLYGGGSR.....                         |
| ChiB_S._marcescens   | .PWEKIT.....NHQAALFGDAAGPTFYNALREANLG.....WSWEELETRAFF  |
| O10363_O._pseudotsug | .AWSNT.....DLGYQTTLTYAP.....SWNA.....                   |
| AAP29899_C._fumifera | .AWSNT.....DLGYQTTLTYAP.....SWNP.....                   |
| AAV73807_B._mori_NPV | .AWSNT.....DLGYQTTVYAP.....SWNS.....                    |
| AAL56186_H._zea_SNPV | .AWSNT.....DLGHQTALYGS.....AWKP.....                    |
| AAF33549_S._exigua_N | .AWSNT.....ELGHQTALFAP.....TWRP.....                    |
| AAZ38189_A._segetum  | .AWSNT.....DLGHQTALFAP.....AWRP.....                    |
| AAS82706_A._segetum  | .AWSNT.....DLGYHTTLYSP.....SWNA.....                    |

|                      |             |                |                      |
|----------------------|-------------|----------------|----------------------|
| ZP_01159013_Photobac | .GWN        | VPGHQTALYCG    | NFMRPGQCDGTGLDENGEP  |
| ZP_01161077_Photobac | .AWNND      | NLGHQSGLYNG    | SHQP                 |
| ZP_01159325_Photobac | .GWGT       | QTGHLTNLHAT    | DNGW                 |
| ZP_01160869_Photobac | .SWGP       | TVGHHSNLYST    | PLTP                 |
| ZP_01233025_V._angus | .GWN        | VPGHQTALYCG    | NFMRPGQCDGTGLDENGEPY |
| ZP_01236284_V._angus | .AWNND      | NLGHQSGLYNG    | SHQP                 |
| ZP_01235109_V._angus | .GWGT       | QTGHLTNLHAT    | DNGW                 |
| ZP_01235465_V._angus | .SWGP       | TVGHHSNLYST    | PLTP                 |
| AAO08114_V._vulnific | .GWN        | VPGHQTALYCG    | NFMRPGQCDGTGVDENGVPY |
| AAO07498_V._vulnific | .GWGQ       | QTGHTTNLHAT    | ERSW                 |
| NP_232428_V._cholera | .GWN        | VLGHQTALYCG    | SFMRPGQCDGKGVDENGEPY |
| YP_432951_H._chejuen | .AWER       | ELSNHTPMQVN    | PSAQ                 |
| YP_529337.1_B.S._deg | .AWAN       | TTGHHTPLYNN    | NEER                 |
| YP_435912_H._chejuen | .GWN        | QLGHQTGLYAG    | DHEI                 |
| ZP_01137509_A._cellu | .AWDATG     | PTNFQDPLFESPND | PSTPVPPGS            |
| ChiE_S._coelicolor   | NSWEPD      | RTGHASNLHT     | D.AEDPYP             |
| ChiC_S._coelicolor   | .AWAKNG     | PTAPHSPLTA     | Y.DGIPQQG            |
| ChiD_S._coelicolor   | .AWDATG     | PTAPHSPLTS     | Y.SGIPKED            |
| NP_903910_C._violace | .GWDAKG     | PTNFQSNLYR     | D.PAAPVTGDQ          |
| YP_529072.1_S._degra | .AFNPQG     | PTAPHSPLYN     | Y.PGMPIEG            |
| ZP_01431615_S._tropi | .AFSPQG     | PTAPHSPLYS     | Y.AGIPQQG            |
| ZP_01136287_A._cellu | .PWEAHG     | PTDFQSELYP     | SA.AEVAVIGSA         |
| 01315.1_C._cinereus  | .PWSPTVGPNA | PLDDACAPANS    |                      |
| 03252.1_C._cinereus  | .NPSVGAGSRS | PLDDTCAPAGA    |                      |
| 05285.1_C._cinereus  | .NWLQVGPNA  | PLRGSCPAS      |                      |
| 05291.1_C._cinereus  | .AWSPTVGPNA | PLQDSCAAN      |                      |
| 01586.1_C._cinereus  | .ASGTPGPNA  | PYGNLCGTSKQ    |                      |
| 128098_P._chrysospor | .GWSKVAGPNA | PLNDTCAPSGQ    |                      |
| 39872_P._chrysospori | .SWSSAVGPNS | PLNDTCAAAAN    |                      |
| 138098_P._chrysospor | .AWSPAVGPNA | PLADACAAPEH    |                      |
| 129436_P._chrysospor | .SASPPGPNA  | PLSNACHNSTQ    |                      |
| EAA71245_G._zeae     | .GWSNVAGPNA | ALYSSCDERN     |                      |
| MGG_04732_M._grisea  | .AWAPTGGPNA | PLEQACDPRN     |                      |
| UM06190_U._maydis    | .SSSNPGPNA  | PLANLCGNSTQ    |                      |
| 04245_F._neoformans  | .SSSTPGPNA  | PLSDGCGNSTQ    |                      |
| 16170_R._oryzae      | .NWNVAGPNA  | ALWGSSHWG      |                      |
| 01334_R._oryzae      | .NWNVAGPNA  | ALRGSSRGWG     |                      |
| 13934_R._oryzae      | .IFSQNSSANA | PLEISNMTNP     |                      |
| 07611_R._oryzae      | .AWNSTSGPNA | PFHNTPGWG      |                      |
| 10252_R._oryzae      | .AWASTTGPNA | PFKYLEGKG      |                      |
| 14659_R._oryzae      | .AWNATGPNA  | PLNAPQGQ       |                      |
| 231399_L._bicolor    | .HWSNSVGPNA | PLDDTCAAPEY    |                      |
| 180319_L._bicolor    | .SWSDVVGPNA | PLADSCAAANL    |                      |
| 191848_L._bicolor    | .SWSTAVGPNA | PLGDSCAPS      |                      |
| 317003_L._bicolor    | .ASSTPGPNA  | PLGNLCGTSKQ    |                      |
| 246840_L._bicolor    | .NPSFVGVPNS | PLDDLCAVSG     |                      |
| 144643_L._bicolor    | .SSSPPGPNS  | PLHDGCGNSTQ    |                      |
| 310136_L._bicolor    | .SFSPTVGPNS | PLDDSCAPT      |                      |
| 629882_M._xanthus    | .WGGWLSWYTS | ALTGEAGNH      |                      |
| 630509_A.M._xanthus  |             |                |                      |
| YP_592598_Acidobacte | .PWMDEAGLNS | PLYQDPNDPE     |                      |
| YP_446903_S._ruber   | .GWSDH      | TGHLANLYP      | PAAPDT               |
| ZP_00739282_B._thuri | .GWEAT      | SNHNAALYK      | D.PNDPAANTN          |
| ZP_01245639_F._johns | .NWYDK      | TCYNAPLYASGN   | PNDPLYG.A            |
| NP_976824_B._cereus  | .GWEAT      | SNHNAALYK      | D.PNDPAADTK          |
| YP_077581_B._licheni | .GWQSI      | SAHNAPLFY      | D.PKAKEAGVPN         |
| 631138_M._xanthus    | .AFEST      | VNFHSALHR      | V.TGDPGAATG          |
| ZP_01247029_F._johns | .W          | PGNPGQHSP      |                      |
| ZP_01234549_V._angus |             | EDHSS          |                      |
| ZP_01160697_Photobac |             | EDHSS          |                      |
| ZP_01158584_Photobac |             | EDHSS          |                      |
| AN0549_E._nidulans   | .AWDSNSKWL  | EPQLNAHTN      |                      |

|                      |                                      |
|----------------------|--------------------------------------|
| AN8481_E._nidulans   | .AWDQNNKWL.....EPQLNSHTN.....        |
| AN9390_E._nidulans   | .TWDGTNPYL.....GPYINSHTN.....        |
| AN0517_E._nidulans   | .MWDQDSKWT.....GPYLQGHSTN.....       |
| AN0541_E._nidulans   | .KWDQFNEWT.....GPYVFGHTN.....        |
| AN5077_E._nidulans   | .TWDSEN.PI.....GNQILAHSTN.....       |
| AN0509_E._nidulans   | .QWDAANPNSQDQCP.....SGNCLRSQVN.....  |
| AN7613_E._nidulans   | .QWEYETSFIQDWCN.....GGNCLRSHV.....   |
| 07035_N._crassa      | .SWDIDNKWT.....GPYANSHSN.....        |
| 07484_N._crassa      | .QWDYGNKWSQEGCA.....NGNCLRSHVN.....  |
| 05317_N._crassa      | .QWDAGNRFSQEGCD.....TGNCLRSQVN.....  |
| EAA74768_G._zeae     | .VWDQHAWT.....KPYLNAHTN.....         |
| EAA78168_G._zeae     | .AWDVGNKWT.....GAFVGAHTN.....        |
| EAA75711_G._zeae     | .FWDEDVRTL.....GKIIRGQAD.....        |
| EAA68447_G._zeae     | .QWDTENSHSQEGCV.....FGNCLRSQVN.....  |
| EAA77156_G._zeae     | .QWDYGNPTINSQCP.....DGNCLRSHVN.....  |
| 12510_S._sclerotioru | .TWDKGNKWT.....GAFLNTHSTN.....       |
| 00773_S._sclerotioru | .TWDIGNEWT.....GAILDAHTN.....        |
| 05454_S._sclerotioru | .IWDANN.PI.....GSTVLAHSN.....        |
| 00677_S._sclerotioru | .PWESTNPSL.....GAYIRPQTS.....        |
| 02128_S._sclerotioru | .QWDYGSASFSDASCP.....AGNCLRSGAN..... |
| MGG_04534_M._grisea  | .VWDKTVNSI.....GPYAFAHSTN.....       |
| MGG_01336_M._grisea  | .FEYSTDG.....LIRAQTD.....            |
| 14527_P._nodorum     | .IWDAQSKAI.....GPYIAPHSTN.....       |
| 15411_P._nodorum     | .....GKPF.....                       |
| 02214_P._nodorum     | .AWDATTPL.....GPKIRPHTD.....         |
| 04761_C._immitis     | .VWDRDN.PI.....GSHIYGHSN.....        |
| 04323_A._capsulatum  | .TWDGNSKWT.....QSVVNPHSTN.....       |
| 00533_B._fuckeliana  | .PWEASNPA.....GAFVRPQTS.....         |
| Chi18_1_H._jecorina  | .QWDYINKYASPGCPSYDQGLGNCLRSHVN.....  |
| Chi18_8_H._jecorina  | .QWDVENKWAIPSC.....GGNCLRSHVN.....   |
| Chi18_9_H._jecorina  | .QWDVGNTWAMSECP.....SGNCLRSHVN.....  |
| Chi18_10_H._jecorina | ..EAYLHLNLQ.G.....KG.....IVN.....    |
| 02650_A._capsulatum  | .....LR.....DTVTKHHTG.....           |
| AN0221_E._nidulans   | .....RR.....DTVTKHHTG.....           |
| 06020_N._crassa      | .....RR.....DTVTKHHTG.....           |
| EAA76014_G._zeae     | .....RR.....DNTTVHHS.....            |
| Chi18_4_H._jecorina  | .....RR.....DSYVKHHS.....            |
| 09277_P._nodorum     | .....RR.....DNVTKHAG.....            |
| 05838_A._capsulatum  | .....RR.....DNVTAHHTS.....           |
| EAA69039_G._zeae     | .....RR.....DHYTTHVS.....            |
| MGG_06594_M._grisea  | .....RR.....DNVTLPHTD.....           |
| Chi18_11_H._jecorina | .....RR.....MNETTHHTS.....           |
| 02644_A_P._nodorum   | .....RR.....DNVTKHHS.....            |
| AN9447_E._nidulans   | .....RR.....NNETKHHTG.....           |

|                      | 550                                | 560                 | 570          | 580 | 590 | 600 |
|----------------------|------------------------------------|---------------------|--------------|-----|-----|-----|
| NP_979924_B._cereus  | .... .... .... .... .... .... .... | PVKEVLQ.....YA..... | KSQMPPQ..... |     |     |     |
| YP_077302_B._licheni | .... .... .... .... .... .... .... | PVRDVIE.....YA..... | LTEMPAS..... |     |     |     |
| YP_091539_B._licheni | .... .... .... .... .... .... .... | EVROTIQ.....FA..... | LRHVPKE..... |     |     |     |
| YP_079121_B._licheni | .... .... .... .... .... .... .... | EVROTIQ.....FA..... | LRHVPKE..... |     |     |     |
| YP_074366_S._thermop | .... .... .... .... .... .... .... | QVRRVLE.....FA..... | VTQIPRE..... |     |     |     |
| YP_075811_S._thermop | .... .... .... .... .... .... .... | QVRQVLD.....YA..... | VSAIPPE..... |     |     |     |
| YP_075619_S._thermop | .... .... .... .... .... .... .... | WVERVVA.....YA..... | VTQIPPE..... |     |     |     |
| ZP_01354047_C._phyto | .... .... .... .... .... .... .... | KVREVLD.....FA..... | VTQIPVD..... |     |     |     |
| ZP_01354926_C._phyto | .... .... .... .... .... .... .... | FLQKAIE.....DT..... | LLQVPKE..... |     |     |     |
| NP_902406_C._violace | .... .... .... .... .... .... .... | WMEDDL.....YA.....  | VERVPAA..... |     |     |     |
| ZP_01136704_A._cellu | .... .... .... .... .... .... .... | WVQTILN.....FA..... | VTVIPPR..... |     |     |     |
| ZP_00526542_S._usita | .... .... .... .... .... .... .... | WVEKLAA.....YA..... | ESQMPKA..... |     |     |     |
| AAF46212.1_D._melano | LMATFNINYTVQW.....WL.....          | KSGLEPQ.....        |              |     |     |     |
| AAF46534.1_D._melano | RNPEFNVNYQVKY.....WT.....          | GNRAPAA.....        |              |     |     |     |
| AAF46544.1_D._melano | YDAELNIDYSIKY.....YL.....          | KAGADRD.....        |              |     |     |     |

|                      |                                |           |               |
|----------------------|--------------------------------|-----------|---------------|
| At4g19720_A._thalian | .PKGPCGDYGLKE...               | WI.....   | KAGLPAK.....  |
| At4g19750_A._thalian | .PAGRSGDSGLSK...               | WL.....   | EAKLPAK.....  |
| EAA67655_G._zeae     | ...KLSTDATIND...               | YIAA..... | G.VSPN.....   |
| EAA73155_G._zeae     | ...PFNTDQAVSA...               | YVGG..... | G.VPSG.....   |
| EAA74986_G._zeae     | ...PYNSDKAIND...               | YIDA..... | G.VPAE.....   |
| EAA74223_G._zeae     | ...PFSTSAAIDF...               | YVRS..... | G.VSPS.....   |
| MGG_05533_M._grisea  | ...KASIDVAVSD...               | YVKA..... | G.VAPG.....   |
| MGG_01247_M._grisea  | ...KFSTEKAVQD...               | YFAR..... | G.IDAA.....   |
| MGG_00086_M._grisea  | ...PFSTDRAVAD...               | YMAA..... | G.VPPS.....   |
| MGG_07927_M._grisea  | ...PFSTDAIAAH...               | YASQ..... | G.VALD.....   |
| Chi18_6_H._jecorina  | ...RANSDDQAVND...              | YVAA..... | G.VNPE.....   |
| Chi18_5_H._jecorina  | ...PFNTDDAVKA...               | YING..... | G.VPAS.....   |
| Chi18_7_H._jecorina  | ...PFSTDAAIDY...               | YTRS..... | G.VAPS.....   |
| 04883_N._crassa      | ...PFSTDRAVTD...               | YIKF..... | G.IPSN.....   |
| 04554_N._crassa      | ...PFSTQRAVEY...               | YLST..... | G.VAAD.....   |
| 11407_B._fuckeliana  | ...PYSTQRAITD...               | YIAK..... | G.VSVS.....   |
| 05350_B._fuckeliana  | ...PYNTEHAVRA...               | YEAK..... | G.VRSH.....   |
| 11700_S._sclerotioru | ...PFSTQRAIVD...               | YVAK..... | G.VPIS.....   |
| 11304_S._sclerotioru | ...PFNTEHAVRA...               | YEAR..... | G.VQGH.....   |
| 08020_S._sclerotioru | ...PFNTQTGISY...               | YIAH..... | G.ITSa.....   |
| 01250_A._capsulatum  | ...PFNADEAVTA...               | YIAG..... | G.VHPK.....   |
| 05886_A._capsulatum  | ...PYSTEAAALDF...              | YIGV..... | GKVPAS.....   |
| 06565_A._capsulatum  | ...PFSTKEAVDY...               | YLGv..... | GNVPPS.....   |
| 05250_C._immitis     | ...PFSADIAVSA...               | YISA..... | G.IHPG.....   |
| 02795_C._immitis     | ...PFSSDKAVKD...               | YIKA..... | G.VPAN.....   |
| 03822_C._immitis     | ...SFSTEALDY...                | YINT..... | GGIPAS.....   |
| AN5454_E._nidulans   | ...PFNTHTAVTA...               | YLAA..... | G.IPAS.....   |
| AN4871_E._nidulans   | ...PFNTVQAVNH...               | YIDA..... | GGVPSN.....   |
| 00269_P._nodorum     | ...PFNTQQALKD...               | YAAA..... | G.VPLN.....   |
| 04870.1_C._cinereus  | ...PINTHEALEF...               | YVSG..... | G.VASH.....   |
| 09921.1_C._cinereus  | ...GYSTDAAALKW...              | YISQ..... | G.ATKS.....   |
| 124149_P._chrysospor | ...PISASQAINW...               | YIEQ..... | G.VPRH.....   |
| 134311_P._chrysospor | ...GVSTDAAVKW...               | YLSQ..... | G.ASAG.....   |
| 03412_F._neoformans  | ...GQSVDRSVRF...               | YLEA..... | G.VHPT.....   |
| 13635_R._oryzae      | ...PLHTDQAVSH...               | YLAA..... | G.IPAH.....   |
| UM04261_U._maydis    | ...PPSADDSINY...               | YIGQ..... | G.VVSH.....   |
| EAA69503_G._zeae     | ...S..ASSGVSy...               | LMSK..... | G.FPPK.....   |
| EAA70860_G._zeae     | ...RKSCQRGVDF...               | LIAN..... | G.FPRH.....   |
| Chi18_3_H._jecorina  | ...S..ASSGVAY...               | LMAQ..... | G.FPAK.....   |
| Chi18_2_H._jecorina  | ...QACATDGVdY...               | ILSR..... | G.FPSR.....   |
| 03026_N._crassa      | ...S..GASSVQY...               | LMAS..... | A.VPGK.....   |
| 01594_B._fuckeliana  | ...AN.GSAAVDY...               | VVST..... | G.FPAS.....   |
| 05897_S._sclerotioru | ...AN.GSAAVDY...               | VIST..... | G.FPAS.....   |
| 04742_A._capsulatum  | ...TASGSSGVAY...               | LLSW..... | G.VPAG.....   |
| 04750_C._immitis     | ...GISCHSGISY...               | VLAQ..... | G.VPSS.....   |
| 04719_P._nodorum     | ...AISGHSAVSY...               | LVRQ..... | G.VPTH.....   |
| MGG_08458_M._grisea  | ...RLSAMQAVSY...               | MIVH..... | G.VHPG.....   |
| CHT4_C._albicans     | ...SLNASDVVQT...               | YIN.....  | KGVHPT.....   |
| 01119_L._elongisporu | ...DMCADSIVKA...               | YTK.....  | HGVSPQ.....   |
| XP_454053_K._lactis  | ...SLSSDTAVKL...               | MTDR..... | HNISSR.....   |
| CTS2_S._cerevisiae   | ...ELNGNFAMHY...               | MIDR..... | FGVNSR.....   |
| 246746_L._bicolor    | ...AISAHEALTW...               | YIGQ..... | G.VARN.....   |
| 03209_N._crassa      | ...RFNTDQAVRD...               | FVRR..... | G.IPAN.....   |
| 14474_P._nodorum     | KFMFPNTKEAIDY...               | YKAN..... | V.ASPC.....   |
| CE06282_C._elegans   | GKSERNVHHTARN...               | YS.....   | CLT.KQAS..... |
| CE03547_C._elegans   | GRKTYNIHSTER...                | YV.....   | CKT.GQSD..... |
| CE03542_C._elegans   | PRKHFTVDWTMKY...               | YA.....   | CKT.RQPN..... |
| CE15845_B_C._elegans | .QINFNVARIMDG...               | YT.....   | SNNEKHAK..... |
| CE02997_C._elegans   | ....IVDENMKY...                | YI.....   | CKS.GQPS..... |
| CE36953_C._elegans   | SG.RMNVHATMKD...               | YS.....   | CQI.KATD..... |
| YP_432439_H._chejuen | ELKAWNYYNTSQYQRIGYLNTDWAYKY... |           | FRGTMQAG..... |
| YP_529449.1_S._degra | ELIQWNAYG.GQYKNIGYLNTDWAYHY... |           | FRGAMPAG..... |



|                      |                                                |               |
|----------------------|------------------------------------------------|---------------|
| YP_077582_B._licheni | ELKQSNIIYTTPEYEGIGYLNTDWAYHY.....              | FRGAVESG..... |
| ChiI_s._coelicolor   | ELAAANVYGSAQYGGIGYLNTDWAYHY.....               | FRGSMPAG..... |
| NP_902986_C._violace | ELAFWNVYSTPQYGNIGYLNTDWAYHY.....               | YRGGLPAS..... |
| ZP_01159608_Photobac | ELAQWNVYGTAAAYGGIGYLNTDWAYHY.....              | FRGSMPAG..... |
| ZP_01234708_V._angus | ELAQWNVYGTAAAYGGIGYLNTDWAYHY.....              | FRGSMPAG..... |
| NP_233087_V._cholera | ELAQWNVYGTAAQYGGIGYLNTDWAYHY.....              | FRGSMPAG..... |
| NP_230718_V._cholera | ELAKWGVYTTAEYQGGIGYLNQAWTHHF.....              | FRGAFKPS..... |
| AAO07185_V._vulnific | ELAQWNVYGTAAQYGGIGYLNTDWAYHY.....              | FRGSMPAG..... |
| ZP_01354150_C._phyto | HIS...TYQVIQN...YLK.....                       | VC.NP.E.....  |
| ZP_01246933_F._johns | EES...TDRAVEF...LLK.....                       | QG.VPAE.....  |
| YP_012734_L._monocyt | YDSGFSVDQTVKY...LKE.....                       | KG.AVSN.....  |
| YP_529337.1_A.S._deg | SPFELTVDAAIKQ...HLMMD.....                     | IPRE.....     |
| ChiA_A.P._kodakarae  | .KYHFCVNYTVQW...YIQH.....                      | V.PDKT.....   |
| AAG19274_Halobacteri | ...EFYVDASMSF...WLDT.....                      | A.FDPA.....   |
| AAG19275_Halobacteri | .AQQYTLLETTLTI...WKEQGYWVDWMEWEDHGPV.DDPG..... |               |
| CE03543_C._elegans   | PRKNFNVDTMKY...YS.....                         | CKT.QQPG..... |
| CE34961_C._elegans   | VKKHFNVDSTMKY...YT.....                        | CMT.EDPS..... |
| CE20043_C._elegans   | PTRH.NVDWTLRY...YA.....                        | EKT.GEPG..... |
| CE15845_A.C._elegans | .....                                          | DPS.....      |
| CE32863_A.C._elegans | ARKNFNVHHTMKY...YV.....                        | EKI.EDPS..... |
| CE03544_C._elegans   | LRQHYNVDWTMKH...YT.....                        | CEL.KKPS..... |
| CE08731_C._elegans   | ARRNFNVDTIKS...YI.....                         | RNI.RRPE..... |
| CE28638_C._elegans   | .....                                          |               |
| CE32863_B.C._elegans | .QINFNVARIMDG...YT.....                        | SNNEKHAK..... |
| CE01673_C._elegans   | ....FNTAWEMKY...HA.....                        | CNS.NQSS..... |
| CE02993_C._elegans   | ....NIDETMKY...YT.....                         | CKT.GQPS..... |
| CE02996_C._elegans   | ....NIDETMKY...YI.....                         | CKT.GQPS..... |
| CE02995_C._elegans   | ....NIDETMKY...YI.....                         | CRT.GQPS..... |
| CE02992_C._elegans   | ....NVDDTLKY...LT.....                         | CIT.KRPS..... |
| CE02999_C._elegans   | ....NVDDTLKY...LI.....                         | CRT.RTPN..... |
| CE02998_C._elegans   | ....NVDETMQY...LI.....                         | CKT.RTPS..... |
| CE09229_C._elegans   | FSGKLNADFSMKF...YA.....                        | CKT.EKPS..... |
| CE12928_C._elegans   | FSGKLNADFSMKF...YA.....                        | CNT.KKPS..... |
| CE23907_C._elegans   | KKGAYNVHHSKI...YS.....                         | CRT.KKSS..... |
| CE32917_C._elegans   | GREAYNVHSSALT...YS.....                        | CKV.KQSK..... |
| CE34579_C._elegans   | RREQWNVDTAAI...YS.....                         | CET.MRSS..... |
| CE25073_C._elegans   | GRKTYNIHHSER...YV.....                         | CKT.GQSD..... |
| CE03548_C._elegans   | GRRNYNIHHSVQS...YV.....                        | CKT.DQSN..... |
| NP_469498_L._innocua | YNSGFSVDQTVKY...LKE.....                       | KG.AVSN.....  |
| CE08730_C._elegans   | ARRKFSVDYTMKY...YI.....                        | RYT.RKPE..... |
| Q8U1H4_P._furiosus   | .....                                          |               |
| CE12474_C._elegans   | ARKNFYVDWTMKH...YT.....                        | CKL.KQPS..... |
| CE02990_C._elegans   | ....NVDEIMKY...YI.....                         | CKT.GQPS..... |
| CE40270_C._elegans   | GRETFNVDDTSKV...LS.....                        | CET.MQSN..... |
| CE40296_C._elegans   | ....NVDEIMKY...YI.....                         | CKT.GQPS..... |
| ChiB_s._marcescens   | SPFSLTVDAAVQQ...HLMMEG.....                    | VPSA.....     |
| O10363_O._pseudotsug | .NELYTTDHAVKL...LTG.....                       | QG.VAAH.....  |
| AAP29899_C._fumifera | .NELYNTDHAVKL...LTN.....                       | QG.VDPR.....  |
| AAV73807_B._mori_NPV | .EELYTTHYAVDA...LLE.....                       | QG.VDPN.....  |
| AAL56186_H._zea_SNPV | .NEPYTANVAVDA...LLA.....                       | QR.VNPK.....  |
| AAF33549_S._exigua_N | .DEPYCADRAVEL...LLG.....                       | QH.VPAG.....  |
| AAZ38189_A._segetum  | .DEPYCADRAVEA...LLK.....                       | QN.VPAS.....  |
| AAS82706_A._segetum  | .EEKYTAEYATKE...LLK.....                       | QN.VNSK.....  |
| ZP_01159013_Photobac | KGPAYTSDIGIQL...LLD.....                       | QG.VPAN.....  |
| ZP_01161077_Photobac | .EIKHTVDLAVKT...LLN.....                       | QG.VEPK.....  |
| ZP_01159325_Photobac | ..WGMGTDVFNK...MIS.....                        | LG.IPAD.....  |
| ZP_01160869_Photobac | ..DDMSVDSQVNA...LLK.....                       | QG.VDRK.....  |
| ZP_01233025_V._angus | KGPAYTSDIGIQL...LLD.....                       | QG.VPAN.....  |
| ZP_01236284_V._angus | .EIKHTVDLAVKT...LLN.....                       | QG.VEPK.....  |
| ZP_01235109_V._angus | ..WGMGTDVFNK...MIS.....                        | LG.IPAD.....  |
| ZP_01235465_V._angus | ..DDMSVDSQVNS...LLK.....                       | HG.VDRK.....  |
| AAO08114_V._vulnific | KGPAYTSDHGIQL...LLA.....                       | QG.VPAN.....  |

|                      |                   |             |                             |      |
|----------------------|-------------------|-------------|-----------------------------|------|
| AAO07498_V._vulnific | ..WGMGADVFINQ...  | MIE         | ..LG                        | IPSE |
| NP_232428_V._cholera | KGPAYTTDNGIQL...  | LLA         | ..QG                        | VPPS |
| YP_432951_H._chejuen | ..SANTSVTTAMSY... | LQS         | ..KG                        | VPNN |
| YP_529337.1_B_S._deg | ..EGFNTHASVQN...  | LLT         | ..AG                        | VPSS |
| YP_435912_H._chejuen | ..HEGFSSDATINN... | LMS         | ..AG                        | VPAN |
| ZP_01137509_A._cellu | ..EHYaidNAIRA...  | YTGGDAAYGIP | ..GG                        | FPAa |
| ChiE_S._coelicolor   | ..FHFSVENAIQT...  | YLD         | ..AG                        | VNPR |
| ChiC_S._coelicolor   | ....FNTADAMAK...  | FKS         | ..KG                        | VPAD |
| ChiD_S._coelicolor   | ....FHTSATIAK...  | LKG         | ..LG                        | VPSS |
| NP_903910_C._violace | ..VYYTVDDAVKT...  | LVN         | ..AG                        | VPRA |
| YP_529072.1_S._degra | ....FSSDHGIQV...  | LKS         | ..KG                        | VPaE |
| ZP_01431615_S._tropi | ....FWSDAAIQK...  | LKS         | ..KG                        | VAAD |
| ZP_01136287_A._cellu | ..QQFSVDQSIDA...  | FLR         | ..AG                        | ADRH |
| 01315.1_C._cinereus  | ..RYGSATSAVRQ...  | WS          | ..AAGIPHN                   |      |
| 03252.1_C._cinereus  | ..KWGSaVSSIEE...  | WT          | ..KAGIPLE                   |      |
| 05285.1_C._cinereus  | ..PLGSVEGSVEA...  | WT          | ..AAGFPaE                   |      |
| 05291.1_C._cinereus  | ..GVGSVASSVAA...  | WT          | ..GAGFPAN                   |      |
| 01586.1_C._cinereus  | ..PHASAQAALaQ...  | WK          | ..AAGFPAN                   |      |
| 128098_P._chrysospor | ..QDGSaVSAVQa...  | WT          | ..SAGFPAN                   |      |
| 39872_P._chrysospori | ..QMGSaVSAVKA...  | WT          | ..AAGMPaH                   |      |
| 138098_P._chrysospor | ..QQGSATSaVAA...  | WT          | ..RAGLPAS                   |      |
| 129436_P._chrysospor | ..ASASaVAGIAA...  | WT          | ..AAGFPAS                   |      |
| EAA71245_G._zeae     | ..NMGSgNQAVTK...  | WN          | ..DAGIPLS                   |      |
| MGG_04732_M._grisea  | ..NQGGIKEGVaK...  | WV          | ..AAGVPaE                   |      |
| UM06190_U._maydis    | ..PRANAAGVKA...   | WS          | ..AAGMPRD                   |      |
| 04245_F._neoformans  | ..PLANAyAAVAS...  | WT          | ..SAGMPAN                   |      |
| 16170_R._oryzae      | ...VDT...TVNL...  | WY          | ..NAGIPKN                   |      |
| 01334_R._oryzae      | ...VET...TVNL...  | WY          | ..NAGIPKN                   |      |
| 13934_R._oryzae      | ...TTSgAAAVQS...  | WI          | ..SAGIPSN                   |      |
| 07611_R._oryzae      | ..YgAGFVEGIQS...  | WN          | ..AAGVPYK                   |      |
| 10252_R._oryzae      | ..APFSFTDSIKQ...  | WK          | ..LAGVPSE                   |      |
| 14659_R._oryzae      | ....ISFSSSIES...  | WI          | ..QAGMPaH                   |      |
| 231399_L._bicolor    | ..QIASAISaVRL...  | WT          | ..NAGMPRK                   |      |
| 180319_L._bicolor    | ..QQGSaESaVAA...  | WT          | ..AAKFPID                   |      |
| 191848_L._bicolor    | ..QAGSaESaVNA...  | WT          | ..AAKFPAN                   |      |
| 317003_L._bicolor    | ..PQASaQAALaQ...  | WK          | ..AAKFPAS                   |      |
| 246840_L._bicolor    | ..QRSSaARLVDA...  | WS          | ..AAGMHLd                   |      |
| 144643_L._bicolor    | ..ADANAyAAyNA...  | WT          | ..SAGFPAS                   |      |
| 310136_L._bicolor    | ..KAGSaVAaVKA...  | WT          | ..GAKFPANQVKERCISLEPAYQTFLF |      |
| 629882_M._xanthus    | ...PTSvSSSLSa...  | WA          | ..NAGIPKN                   |      |
| 630509_A_M._xanthus  |                   |             |                             |      |
| YP_592598_Acidobacte | ..QAGSLKTSMDL...  | FHG         | ..IYGVPRa                   |      |
| YP_446903_S._ruber   | ..LQRSaATAVNM...  | FVK         | ..AG                        | VPPQ |
| ZP_00739282_B._thuri | ....FYVDGaIDV...  | YTN         | ..EG                        | VPVD |
| ZP_01245639_F._johns | ..TQSESLDELtNQ... | YLN         | ..VIG                       | FPAN |
| NP_976824_B._cereus  | ....FYVDGaIDI...  | YTN         | ..EG                        | VPAD |
| YP_077581_B._licheni | ..aETYNIENTVKR... | YKE         | ..AG                        | VKGD |
| 631138_M._xanthus    | ....FYTDGSVSK...  | MLa         | ..LG                        | VGPa |
| ZP_01247029_F._johns | ....YSMAVNQFNy... | WT          | ..GRGLPAS                   |      |
| ZP_01234549_V._angus | ...YKDSVNALNy...  | WLI         | ..ERHLDPQ                   |      |
| ZP_01160697_Photobac | ...YKDSVNALNy...  | WLI         | ..ERHLDPQ                   |      |
| ZP_01158584_Photobac | ...YKDTKTALDY...  | WIH         | ..KRHLDPH                   |      |
| AN0549_E._nidulans   | ...LTeITNALDL...  | LW          | ..RNDISPD                   |      |
| AN8481_E._nidulans   | ...LTeITNALDL...  | LW          | ..RNNIKPG                   |      |
| AN9390_E._nidulans   | ...LTeIDLAMEL...  | LW          | ..RNDIDPK                   |      |
| AN0517_E._nidulans   | ...ITQIElGLDL...  | LW          | ..RNNIDPa                   |      |
| AN0541_E._nidulans   | ...VTEIEIGVDL...  | LR          | ..RNNINLy                   |      |
| AN5077_E._nidulans   | ...LTeIDLALDL...  | FW          | ..RVDVDPS                   |      |
| AN0509_E._nidulans   | ...LTETMTSLAM...  | IT          | ..KAGVPSD                   |      |
| AN7613_E._nidulans   | .....T            |             | ..KAGVPRS                   |      |
| 07035_N._crassa      | ...MTEIQQALDL...  | LW          | ..RNNIKPa                   |      |
| 07484_N._crassa      | ...LTETKTALAM...  | IT          | ..KAGVDSG                   |      |

|                      |                  |       |       |         |       |
|----------------------|------------------|-------|-------|---------|-------|
| 05317_N._crassa      | ...LTETKQSLAM... | IT    | ...   | KAGVPGR | ..... |
| EAA74768_G._zeae     | ...LTEIDSDLDL... | FW    | ..... | RNDIDPD | ..... |
| EAA78168_G._zeae     | ...LTEIKSSIDL... | LW    | ..... | RNKVSPS | ..... |
| EAA75711_G._zeae     | ...IREIGNNTIP... | LW    | ..... | FDGLDPK | ..... |
| EAA68447_G._zeae     | ...LTETQYSLAM... | IT    | ..... | KAGVPSN | ..... |
| EAA77156_G._zeae     | ...KTETLDSLAM... | IT    | ..... | KAGVDPA | ..... |
| 12510_S._sclerotioru | ...LTEIDLAMD...  | IW    | ..... | RNDINPN | ..... |
| 00773_S._sclerotioru | ...LTEIESSMNL... | LW    | ..... | WNNITSS | ..... |
| 05454_S._sclerotioru | ...ITEINLALNL... | FW    | ..... | RNDVPAP | ..... |
| 00677_S._sclerotioru | ...LLDINSVLSP... | LW    | ..... | FAGVDPS | ..... |
| 02128_S._sclerotioru | ...LTETLESLSM... | IT    | ..... | KAGVASN | ..... |
| MGG_04534_M._grisea  | ...LTEIQIGLEL... | LW    | ..... | RNNINPA | ..... |
| MGG_01336_M._grisea  | ...IRDITEFIKP... | LW    | ..... | YSSVPAA | ..... |
| 14527_P._nodorum     | ...ITEIDLGLDL... | LW    | ..... | RAGVDPK | ..... |
| 15411_P._nodorum     | ...YRKL          | ..... | ..... | FDGVDP  | ..... |
| 02214_P._nodorum     | ...LQEVDTALNL... | LW    | ..... | GTQIDSR | ..... |
| 04761_C._immitis     | ...ITEMRLALDL... | LW    | ..... | RNDVPAH | ..... |
| 04323_A._capsulatum  | ...LTEISAALDL... | LW    | ..... | RNSVPPE | ..... |
| 00533_B._fuckeliana  | ...LPDITNAISP... | LW    | ..... | FAGVDPM | ..... |
| Chi18_1_H._jecorina  | ...LTETLNALSM... | IT    | ..... | KAGVPSN | ..... |
| Chi18_8_H._jecorina  | ...KTETYNALAM... | IT    | ..... | KAGVKST | ..... |
| Chi18_9_H._jecorina  | ...QTEVVLALSM... | IT    | ..... | KAGVSAS | ..... |
| Chi18_10_H._jecorina | ...MTETLNALAM... | IT    | ..... | KAGVEAR | ..... |
| 02650_A._capsulatum  | ...LALSLESIDA... | YM    | ..... | AAGLPSS | ..... |
| AN0221_E._nidulans   | ...VQLSLESIDA... | YI    | ..... | EAGMPPE | ..... |
| 06020_N._crassa      | ...VELSLQAVDA... | YV    | ..... | AAGAAPQ | ..... |
| EAA76014_G._zeae     | ...VENSQEAQOR... | YI    | ..... | DRGASPS | ..... |
| Chi18_4_H._jecorina  | ...IDESEAAIRR... | YM    | ..... | DRGAPPH | ..... |
| 09277_P._nodorum     | ...TQQSLAAIKA... | YR    | ..... | KRGVPAD | ..... |
| 05838_A._capsulatum  | ...EKGCLQTVQN... | YL    | ..... | DIKLPPE | ..... |
| EAA69039_G._zeae     | ...IAGAARAIK...  | YI    | ..... | SLGFPPS | ..... |
| MGG_06594_M._grisea  | ...VKGSAAVVDR... | YI    | ..... | ALGCEPK | ..... |
| Chi18_11_H._jecorina | ...VNGSLNSVNT... | YL    | ..... | ERGLSPD | ..... |
| 02644_A_P._nodorum   | ...VVDSAATIER... | YL    | ..... | AIGAPPE | ..... |
| AN9447_E._nidulans   | ...IADSHDTIKA... | YL    | ..... | EIGAPPE | ..... |

|                      | 610              | 620 | 630   | 640 | 650   | 660 |
|----------------------|------------------|-----|-------|-----|-------|-----|
| NP_979924_B._cereus  | ...KIMMGQNLGYFD  | ... | WKL   | ... | FK    | ... |
| YP_077302_B._licheni | ...KIVMGQNLGYD   | ... | WTL   | ... | YT    | ... |
| YP_091539_B._licheni | ...KIVLGFPLYGYN  | ... | WTL   | ... | YQ    | ... |
| YP_079121_B._licheni | ...KIVLGFPLYGYN  | ... | WTL   | ... | YQ    | ... |
| YP_074366_S._thermop | ...KIMMGQNLGYD   | ... | WTL   | ... | YR    | ... |
| YP_075811_S._thermop | ...KILMGIPTYGRD  | ... | WRL   | ... | YQ    | ... |
| YP_075619_S._thermop | ...KILLGIPAYGYD  | ... | WIAG  | ... | T     | ... |
| ZP_01354047_C._phyto | ...RIDMGIPNYGYD  | ... | WALP  | ... | YV    | ... |
| ZP_01354926_C._phyto | ...KLIMGIPFYARL  | ... | WKEY  | ... | TE    | ... |
| NP_902406_C._violace | ...KILNGIPAYGYD  | ... | WKR   | ... |       | ... |
| ZP_01136704_A._cellu | ...KIFMGVPLYGYD  | ... | WAS   | ... | T     | ... |
| ZP_00526542_S._usita | ...KISLGVALYGRR  | ... | WSAG  | ... | MR    | ... |
| AAF46212.1_D._melano | ...RLVVGLPTYGHS  | ... | FTLVN | ... | PLNHR | ... |
| AAF46534.1_D._melano | ...KINVGIATYGRA  | ... | WKLTK | ... | D.SGL | ... |
| AAF46544.1_D._melano | ...KLVLGIPTYGRS  | ... | YTLIN | ... | EESTE | ... |
| At4g19720_A._thalian | ...KAVLGFPPYVGT  | ... | WSLG  | ... | SG    | ... |
| At4g19750_A._thalian | ...KAVLGFPSYCGWA | ... | WTLED | ... | AENNG | ... |
| EAA67655_G._zeae     | ...KIHLGMPYGRS   | ... | FAN   | ... | TA    | ... |
| EAA73155_G._zeae     | ...KMLGMPYIGRA   | ... | FQN   | ... | TG    | ... |
| EAA74986_G._zeae     | ...KIVLGMPYIGRS  | ... | FEG   | ... | NL    | ... |
| EAA74223_G._zeae     | ...KIVLGMPYIGRA  | ... | FQN   | ... | TD    | ... |
| MGG_05533_M._grisea  | ...KINLGLPLYGRS  | ... | FDK   | ... | TT    | ... |
| MGG_01247_M._grisea  | ...KITLGLPLYGRS  | ... | FAS   | ... | TG    | ... |
| MGG_00086_M._grisea  | ...KIVLGMPYIGRT  | ... | FQN   | ... | TD    | ... |

|                      |                                                 |
|----------------------|-------------------------------------------------|
| MGG_07927_M._grisea  | ...KIVMGMPYIGRA.....FEN.....TD.....             |
| Chi18_6_H._jecorina  | ...KIILGIPLYGRS.....FMN.....TD.....             |
| Chi18_5_H._jecorina  | ...KIVLGMPYIGRS.....FES.....TS.....             |
| Chi18_7_H._jecorina  | ...KIVLGMPYIGRA.....FEN.....TD.....             |
| 04883_N._crassa      | ...KIVLGMPYIGRA.....FAS.....TD.....             |
| 04554_N._crassa      | ...KIVLGMPYIGRA.....FQG.....TE.....             |
| 11407_B._fuckeliana  | ...KIIMGLPLYGRA.....FES.....TI.....             |
| 05350_B._fuckeliana  | ...KIVLGMPYIGRA.....FQG.....TE.....             |
| 11700_S._sclerotioru | ...KIILGLPINKGS.....FLN.....TT.....             |
| 11304_S._sclerotioru | ...KIVLGMPYIGRA.....FQG.....TE.....             |
| 08020_S._sclerotioru | ...KIVLGMPYIGRS.....FEQ.....TN.....             |
| 01250_A._capsulatum  | ...KLVFGLPLYGRA.....FEN.....TD.....             |
| 05886_A._capsulatum  | ...KMILGMPYIGRE.....FAD.....TD.....             |
| 06565_A._capsulatum  | ...KLILGMPYIGRT.....FAD.....TD.....             |
| 05250_C._immitis     | ...KIIFGLPLYGRG.....FEN.....TQ.....             |
| 02795_C._immitis     | ...KIVLGMPYIGRA.....FAS.....TD.....             |
| 03822_C._immitis     | ...KLVLGMPYIGRA.....FAN.....TE.....             |
| AN5454_E._nidulans   | ...KINLGMPYIGRS.....FTH.....TD.....             |
| AN4871_E._nidulans   | ...KIILGMPYIGRA.....FQN.....TD.....             |
| 00269_P._nodorum     | ...KIVLGMPYIGRA.....FAN.....TD.....             |
| 04870.1_C._cinereus  | ...KLVMGIPLYGRS.....FTQ.....TD.....             |
| 09921.1_C._cinereus  | ...KINVGMPLYGRA.....FQN.....TD.....             |
| 124149_P._chrysospor | ...KLILGIPLYGRS.....FMN.....TD.....             |
| 134311_P._chrysospor | ...KIVMGIPLYGRA.....FED.....TT.....             |
| 03412_F._neoformans  | ...KLVIGLPVYGRA.....FAN.....TK.....             |
| 13635_R._oryzae      | ...KLVIGLPVYGRG.....FSN.....TA.....             |
| UM04261_U._maydis    | ...KLVIGIPLYGRG.....FEN.....TD.....             |
| EAA69503_G._zeae     | ...KILLGIPTFGRS.....FLH.....CT.....             |
| EAA70860_G._zeae     | ...KIILGIPVYARY.....FGQ.....AR.....             |
| Chi18_3_H._jecorina  | ...NILLGIPTYGRS.....FLK.....SN.....             |
| Chi18_2_H._jecorina  | ...KIVLGIPAYARY.....FPR.....AE.....             |
| 03026_N._crassa      | ...KILFGIPLEGRS.....FLH.....AS.....             |
| 01594_B._fuckeliana  | ...KILLGVPVYGRS.....FLN.....SR.....             |
| 05897_S._sclerotioru | ...KILLGVPVYGRS.....FLN.....SR.....             |
| 04742_A._capsulatum  | ...KILLGIPVYGRA.....FPG.....AN.....             |
| 04750_C._immitis     | ...KILLGISVYGRA.....FPG.....TT.....             |
| 04719_P._nodorum     | ...KIVLGVPAYGRS.....FTG.....TK.....             |
| MGG_08458_M._grisea  | ...QIVLGVPAYARF.....FRG.....AR.....             |
| CHT4_C._albicans     | ...KLILGMPMYGRI.....FHG.....VDRP.....           |
| 01119_L._elongisporu | ...KLVLGMPMYARI.....FSG.....VQEG.....           |
| XP_454053_K._lactis  | ...RIALGMAAYGRG.....FTN.....V.....ETNDDN.....   |
| CTS2_S._cerevisiae   | ...KLVLGMAAYGRS.....FHIKDNKF.....EPFNQNTV.....  |
| 246746_L._bicolor    | ...KIVLGIPLYGRS.....FMN.....TQ.....             |
| 03209_N._crassa      | ...KIVLGIPLYGRS.....FEG.....TD.....             |
| 14474_P._nodorum     | ...KIVLGMPYIGRS.....FGN.....VVDLSKDQ..R.....    |
| CE06282_C._elegans   | ...KFNIVIPFYATL.....WENVY.....ETVLD.....        |
| CE03547_C._elegans   | ...KYNIAIPFYTML.....WKHVK.....GPVNP.....        |
| CE03542_C._elegans   | ...KFNIVIPFYARI.....WRSVG.....EAIT.....         |
| CE15845_B_C._elegans | ...KFNLGILFSAKL.....WKNVE.....EPAE.....         |
| CE02997_C._elegans   | ...KFNIIVSEFHATY.....WNGAE.....LPLRD.....       |
| CE36953_C._elegans   | ...KINMGVPFYGRF.....WKNVG.....DAVD.....         |
| YP_432439_H._chejuen | ...RINIGVPYYSRG.....WQGVNGGDNMGWGTASAPDQN.....  |
| YP_529449.1_S._degra | ...RINIGVPYYTRG.....WQGVTTGGTNGLWGQASLPNQS..... |
| YP_077582_B._licheni | ...RINIGVPYYTRG.....WKNVTGGANGLWGRAKSA.....     |
| ChiI_S._coelicolor   | ...RINIGLPYYTRG.....HKNVQGGTDGLWGRASAS.....     |
| NP_902986_C._violace | ...RVNMGVPYYTRG.....WKNVSGGSNGLWGSSVGS.....     |
| ZP_01159608_Photobac | ...RINIGVPYYTRG.....WQDVKGVNDNGLWGRAALPNQS..... |
| ZP_01234708_V._angus | ...RINIGVPYYTRG.....WQDVKGGDNGLWGRAALPNQS.....  |
| NP_233087_V._cholera | ...RINIGVPYYTRG.....WQGVTTGGENGLWGRAALPNQN..... |
| NP_230718_V._cholera | ...QINMGIPYYTRG.....WQGVSGGDKGLWGRAVEPNQS.....  |
| AAO07185_V._vulnific | ...RINIGVPYYTRG.....WQGVTTGGTNGLWGRAALPNQA..... |
| ZP_01354150_C._phyto | ...KLVLGIPAYGYG.....WRGVASE.....NH.....         |



|                      |                                                          |                                 |                        |
|----------------------|----------------------------------------------------------|---------------------------------|------------------------|
| ZP_01246933_F._johns | ...KLVI <b>GGAFY</b> TRQ.....                            | WKN <b>VENI</b> .....           | NN.....                |
| YP_012734_L._monocyt | ...KIV <b>VGA</b> AFYTRG.....                            | WNK <b>VAA</b> G.....           | TD <b>TAL</b> .....    |
| YP_529337.1_A.S._deg | ...KIV <b>MGV</b> PFYGRA.....                            | FFNT <b>GSSN</b> ..             | TGLY <b>QTFN</b> ..... |
| ChiA_A.P._kodakarae  | ...KIT <b>VGL</b> PFYSR.....                             | SFAN <b>VPP</b> .....           | EN.N.....              |
| AAG19274_Halobacteri | ...QLS <b>LGL</b> PFYGR.....                             | SFG <b>NVASS</b> .....          | DN.N.....              |
| AAG19275_Halobacteri | ...TLVL <b>GMP</b> FYGRGCNV <b>ENGIWD</b> ..             | TFSL <b>SEWQ</b> .....          | QG.D.....              |
| CE03543_C._elegans   | ...KFN <b>MVIP</b> FYARY.....                            | WNN <b>VQ</b> .....             | EA <b>VD</b> .....     |
| CE34961_C._elegans   | ...KFN <b>MVIP</b> FYVRL.....                            | WKN <b>VK</b> .....             | EP <b>IS</b> .....     |
| CE20043_C._elegans   | ...KLN <b>MVIP</b> FFVRL.....                            | WKN <b>V</b> P.....             | EP <b>VE</b> .....     |
| CE15845_A.C._elegans | ...KLN <b>LVIP</b> FFYARR.....                           | WEH <b>VK</b> .....             | ES <b>LD</b> .....     |
| CE32863_A.C._elegans | ...KLN <b>LVIP</b> FFYARR.....                           | WEH <b>VK</b> .....             | ES <b>LD</b> .....     |
| CE03544_C._elegans   | ...MIN <b>LVIP</b> FFYVRM.....                           | WKN <b>VQ</b> .....             | KA <b>ID</b> .....     |
| CE08731_C._elegans   | ...KFN <b>LAIP</b> FSVRL.....                            | WRN <b>VE</b> .....             | DA <b>IQ</b> .....     |
| CE28638_C._elegans   | .....                                                    | H <b>LD</b> .....               | KK <b>LN</b> .....     |
| CE32863_B.C._elegans | ...KFN <b>L</b> GILEFS <b>AKL</b> .....                  | WKN <b>VE</b> .....             | EP <b>AE</b> .....     |
| CE01673_C._elegans   | ...KFN <b>L</b> VIP.....                                 | .....                           | .....                  |
| CE02993_C._elegans   | ...KFN <b>I</b> VSF <b>HGT</b> F.....                    | WK <b>DAE</b> .....             | LP <b>LRN</b> .....    |
| CE02996_C._elegans   | ...KFN <b>I</b> VSF <b>HGT</b> F.....                    | WE <b>GAE</b> .....             | LP <b>LRD</b> .....    |
| CE02995_C._elegans   | ...KFN <b>MMV</b> L <b>FHGT</b> F.....                   | WK <b>GAE</b> .....             | LP <b>LRN</b> .....    |
| CE02992_C._elegans   | ...ILN <b>MGV</b> T <b>FTG</b> IF.....                   | WNG <b>VK</b> .....             | DG <b>LNE</b> .....    |
| CE02999_C._elegans   | ...KLN <b>MV</b> VS <b>FNGIY</b> .....                   | WG <b>NTT</b> .....             | LP <b>FDD</b> .....    |
| CE02998_C._elegans   | ...KLN <b>MAL</b> S <b>FGY</b> RY.....                   | WEN <b>VN</b> .....             | DN <b>VP</b> .....     |
| CE09229_C._elegans   | ...QLN <b>MGV</b> PFY <b>GRY</b> .....                   | WKN <b>V</b> L.....             | GP <b>IDK</b> .....    |
| CE12928_C._elegans   | ...QLT <b>MGV</b> PFY <b>GRY</b> .....                   | WKN <b>V</b> L.....             | EP <b>IDA</b> .....    |
| CE23907_C._elegans   | ...KFN <b>IAIP</b> FYATL.....                            | WEN <b>VY</b> .....             | EP <b>FPS</b> .....    |
| CE32917_C._elegans   | ...KFN <b>I</b> VIPFFARL.....                            | WKN <b>VE</b> .....             | KP <b>IQH</b> .....    |
| CE34579_C._elegans   | ...KFN <b>I</b> VIPFFARL.....                            | WNN <b>VG</b> .....             | KP <b>IDF</b> .....    |
| CE25073_C._elegans   | ...KYN <b>IAIP</b> FYTML.....                            | WKH <b>VK</b> .....             | GP <b>VNP</b> .....    |
| CE03548_C._elegans   | ...KYN <b>IAIP</b> FYTML.....                            | WKH <b>VQ</b> .....             | GP <b>INP</b> .....    |
| NP_469498_L._innocua | ...KIV <b>VGA</b> AFYTRG.....                            | WNK <b>VAA</b> G.....           | TD <b>TAL</b> .....    |
| CE08730_C._elegans   | ...KFN <b>LIIP</b> FYVRH.....                            | WRN <b>VE</b> .....             | NA <b>IK</b> .....     |
| Q8U1H4_P._furiosus   | .....                                                    | .....                           | .....                  |
| CE12474_C._elegans   | ...MLN <b>MVIP</b> FSARI.....                            | WNN <b>VQ</b> .....             | EA <b>ID</b> .....     |
| CE02990_C._elegans   | ...KFN <b>IIIS</b> F <b>HATY</b> .....                   | WE <b>GTD</b> .....             | LP <b>LRD</b> .....    |
| CE40270_C._elegans   | ...KFN <b>IAIP</b> FYTTL.....                            | WEN <b>VQ</b> .....             | GP <b>ID</b> .....     |
| CE40296_C._elegans   | ...KFN <b>IIVS</b> F <b>HATY</b> .....                   | WE <b>GAE</b> .....             | LP <b>LRD</b> .....    |
| ChiB_S._marcescens   | ...KIV <b>MGV</b> PFYGRA.....                            | FKG <b>VSGGN</b> ..             | GGQY <b>SSHS</b> ..... |
| O10363_O._pseudotsug | ...KLIV <b>GVAM</b> YGRG.....                            | WTG <b>VSGY</b> .....           | AG.....                |
| AAP29899_C._fumifera | ...KIIV <b>GVAM</b> YGRG.....                            | WTG <b>VAGY</b> .....           | DG.....                |
| AAV73807_B._mori_NPV | ...KIIV <b>GVAM</b> YGRG.....                            | WTG <b>V</b> TNY.....           | TN.....                |
| AAL56186_H._zea_SNPV | ...KLVL <b>GVAM</b> YGRG.....                            | WTG <b>VHNY</b> .....           | DS.....                |
| AAF33549_S._exigua_N | ...KIAL <b>GVAM</b> YGRG.....                            | WSG <b>VVSD</b> .....           | DT.....                |
| AAZ38189_A._segetum_ | ...KIAL <b>GVAM</b> YGRG.....                            | WTG <b>VSSD</b> .....           | G.....                 |
| AAS82706_A._segetum_ | ...KIVL <b>AVAM</b> YGRG.....                            | WTG <b>VHDI</b> .....           | KN.....                |
| ZP_01159013_Photobac | ...KLVL <b>GAA</b> MYGRG.....                            | WTG <b>VTPD</b> .....           | TL <b>TD</b> .....     |
| ZP_01161077_Photobac | ...KIIV <b>GTP</b> FYGRG.....                            | WKG <b>VHDV</b> .....           | QG.....                |
| ZP_01159325_Photobac | ...KL <b>VVGA</b> AFYGRG.....                            | WE <b>G</b> TKGF.....           | DG <b>KAI</b> .....    |
| ZP_01160869_Photobac | ...KVI <b>IGSP</b> FYGRG.....                            | WKG <b>VDNA</b> .....           | STD <b>KL</b> .....    |
| ZP_01233025_V._angus | ...KLVL <b>GAA</b> MYGRG.....                            | WTG <b>VTPD</b> .....           | TL <b>TD</b> .....     |
| ZP_01236284_V._angus | ...KIIV <b>GTP</b> FYGRG.....                            | WKG <b>VHDV</b> .....           | QG.....                |
| ZP_01235109_V._angus | ...KL <b>VVGA</b> AFYGRG.....                            | WE <b>G</b> TKGF.....           | DG <b>KAI</b> .....    |
| ZP_01235465_V._angus | ...KII <b>IGSP</b> FYGRG.....                            | WKG <b>VDNA</b> .....           | SAD <b>KL</b> .....    |
| AAO08114_V._vulnific | ...KLVL <b>G</b> TAM <b>YGRG</b> .....                   | WE <b>G</b> VMPS.....           | TL <b>RD</b> .....     |
| AAO07498_V._vulnific | ...KL <b>VIGA</b> AFYGRG.....                            | WQ <b>G</b> TKDY.....           | DGQ <b>AP</b> .....    |
| NP_232428_V._cholera | ...KL <b>VVGA</b> AM <b>YGRG</b> .....                   | WE <b>G</b> VTPA.....           | SL <b>KD</b> .....     |
| YP_432951_H._chejuen | ...KLM <b>GV</b> ANY <b>HRAKRLNSAADITEYS</b> DGIAGA..... | .....                           | TAH <b>Q</b> P.....    |
| YP_529337.1_B.S._deg | ...KL <b>VVGA</b> AFYGRG.....                            | WV <b>G</b> TQNT.....           | NA <b>AKS</b> .....    |
| YP_435912_H._chejuen | ...KLVL <b>GAA</b> MYGRG.....                            | WKG <b>V</b> TGG.....           | TE.....                |
| ZP_01137509_A._cellu | ...KIN <b>IGV</b> PFY <b>RR</b> .....                    | GWT <b>GVSAG</b> .....          | SN.H.....              |
| ChiE_S._coelicolor   | ...KL <b>T</b> VG <b>FP</b> FYGR.....                    | GWQ <b>G</b> VGE <b>G</b> ..... | GA.A.....              |
| ChiC_S._coelicolor   | ...KLL <b>IGIG</b> FYGR.....                             | GWT <b>G</b> VTQS.....          | AP.....                |
| ChiD_S._coelicolor   | ...KLL <b>LGLG</b> FYGR.....                             | GWT <b>G</b> VTQA.....          | DP.....                |

|                      |                        |               |                         |               |
|----------------------|------------------------|---------------|-------------------------|---------------|
| NP_903910_C_violace  | ...KINVGLPFYGR.....    | GWAGVAAG..... | PKGD.....               |               |
| YP_529072.1_S_degra  | ...KILLGIGFYGR.....    | GWNTVTQD..... | AP.....                 |               |
| ZP_01431615_S_tropi  | ...KLLLGIGFYGR.....    | GWTVGTQA..... | AP.....                 |               |
| ZP_01136287_A_cellu  | ...KLLVGVVPFYGH.....   | GWVGVDPG..... | GT.H.....               |               |
| 01315.1_C_cinereus   | ...QLVLGVAAAYGHG.....  | FRVRR.....    | ANAFAA.....             | GSN.....      |
| 03252.1_C_cinereus   | ...KLVLGVPAHGHS.....   | YDVSP.....    | VVALSR.....             | SNS.....      |
| 05285.1_C_cinereus   | ...KLLGLPAYARS.....    | FTVAK.....    | DDVLDA.....             | DG.....       |
| 05291.1_C_cinereus   | ...KLVLGVPAYGRS.....   | YYVDP.....    | ANALSA.....             | AG.....       |
| 01586.1_C_cinereus   | ...KQLLGLALYGWV.....   | SKSTK.....    | NVLTGAFMPTDDMVLLTKSETSS |               |
| 128098_P_chrysospor  | ...QIVLALAAAYGHG.....  | FVVDS.....    | TAAFDT.....             | SNS.....      |
| 39872_P_chrysospori  | ...QIVLGVASYGHS.....   | FTVPP.....    | SAAFTS.....             | GDD.....      |
| 138098_P_chrysospor  | ...KIVLGVAAAYGHS.....  | YHVAP.....    | ADAFGG.....             | ASSAGEA       |
| 129436_P_chrysospor  | ...KIVLGVPSYGYI.....   | SHSSA.....    | DGLQT.....              | R.....        |
| EAA71245_G_zeae      | ...QIVLGMPPNYGHG.....  | FKVNA.....    | TSAYN.....              |               |
| MGG_04732_M_grisea   | ...KLILGIGAYGHG.....   | FTVSQ.....    | ADAFVP.....             | TTDG.....     |
| UM06190_U_maydis     | ...KILLGIPAYGYI.....   | NTSKK.....    | QTLR.....               | T.....RS..... |
| 04245_F_neoformans   | ...QITLGVPAYGYI.....   | QVSSA.....    | SSLIQ.....              | RRS.LP.....   |
| 16170_R_oryzae       | ...KMHVGVTFYGVK.....   | LKTAQ.....    | PITSTS.....             |               |
| 01334_R_oryzae       | ...KMHVGITFYGVK.....   | LKTAQ.....    | PITATS.....             |               |
| 13934_R_oryzae       | ...KIYLGVPFYGYT.....   | HKTTA.....    | EINLET.....             |               |
| 07611_R_oryzae       | ...KLAGGIPFYGRA.....   | QTLSTV.....   | D.....SAP.....          |               |
| 10252_R_oryzae       | ...KITAGLAFYGRA.....   | MKANV.....    | NMITDP.....             |               |
| 14659_R_oryzae       | ...QLTGGGLAFYGRS.....  | TTAKV.....    | N.MLKK.....             |               |
| 231399_L_bicolor     | ...QIVLGVAGYGRQ.....   | YRVRR.....    | SDAFMS.....             | GS.....       |
| 180319_L_bicolor     | ...KLVLGVAAAYGHS.....  | FSVSK.....    | NIAVVN.....             | S.....        |
| 191848_L_bicolor     | ...KIALGVAAAYGHS.....  | FSVAN.....    | SAAVVN.....             | N.....        |
| 317003_L_bicolor     | ...QLLLGLPLYGYV.....   | SQSTK.....    | TALTGSLMPSDDMVLLQNIERP  | G.....        |
| 246840_L_bicolor     | ...QIVLGVPAYGYG.....   | YSVSK.....    | KLAFTS.....             | G.....        |
| 144643_L_bicolor     | ...KLVLGIPSYGYV.....   | ITSNS.....    | TRLKT.....              | R.....        |
| 310136_L_bicolor     | FFCKIALGVAAAYGHS.....  | FHVTT.....    | SAALGS.....             | SG.....       |
| 629882_M_xanthus     | ...KLGMPFYGYMA.....    | WRNIT.....    | GPYQPY.....             | TDW.....      |
| 630509_A_M_xanthus   | ...                    | ...           | ...                     | ...           |
| YP_592598_Acidobacte | ...KLNIGTAFYGYE.....   | FDNVR.....    | R.LWN.....              |               |
| YP_446903_S_ruber    | ...KLVLGVVPFYGR.....   | GWSGAGAR..... | DD.....                 |               |
| ZP_00739282_B_thuri  | ...KLVLGVVPFYGR.....   | GWKSCGKE..... | NN.....                 |               |
| ZP_01245639_F_johns  | ...KLIMGLPFYGK.....    | KFDNVAAN..... | STN.....                |               |
| NP_976824_B_cereus   | ...KLVLGVVPFYGR.....   | GWKSCGKE..... | NN.....                 |               |
| YP_077581_B_licheni  | ...KLVLGTFPYGR.....    | GWSGCEPG..... | GH.....                 |               |
| 631138_M_xanthus     | ...KIVVGVVPFYGR.....   | GWGSVPNV..... | NN.....                 |               |
| ZP_01247029_F_johns  | ...KAIIGLPFYGYG.....   | FG.....       |                         |               |
| ZP_01234549_V_angus  | ...RITLGLPAYPR.....    |               |                         |               |
| ZP_01160697_Photobac | ...RITLGLPAYPR.....    |               |                         |               |
| ZP_01158584_Photobac | ...RVTLGLPSYSH.....    |               |                         |               |
| AN0549_E_nidulans    | ...KVVVLGVAFYARV.....  | FSASN.....    | PGCME.....              |               |
| AN8481_E_nidulans    | ...KVVVLGMFAFYARV..... | FAAAS.....    | PSCME.....              |               |
| AN9390_E_nidulans    | ...KVVVMGMGFYGRS.....  | FTLSD.....    | PACNT.....              |               |
| AN0517_E_nidulans    | ...NVVFGIAFYGRS.....   | FTLTD.....    | SNCYQ.....              |               |
| AN0541_E_nidulans    | ...KVSIGMGFYGRT.....   | FTLSD.....    | PGCSE.....              |               |
| AN5077_E_nidulans    | ...SIVLGIGFYGRT.....   | FQLSS.....    | GSCWK.....              |               |
| AN0509_E_nidulans    | ...RVVVGVASYGRS.....   | FAMAE.....    | VGCYG.....              |               |
| AN7613_E_nidulans    | ...AITIGVASYGRA.....   | FGMAE.....    | ADCIR.....              |               |
| 07035_N_crassa       | ...KVTFGMAFYRSR.....   | FALTS.....    | PSCNT.....              |               |
| 07484_N_crassa       | ...KVVVGVSYSYGRS.....  | FNMAAD.....   | AGCYS.....              |               |
| 05317_N_crassa       | ...KIIIVGVTSYGRS.....  | FEMAQ.....    | PGCWG.....              |               |
| EAA74768_G_zeae      | ...KIVMGLGFYGRA.....   | FMAKI.....    | ASCVE.....              |               |
| EAA78168_G_zeae      | ...KVVVLGLAFYGRS.....  | VTLAS.....    | SSCSE.....              |               |
| EAA75711_G_zeae      | ...KINFGGLAMYGRG.....  | YTVAD.....    | KSCNG.....              |               |
| EAA68447_G_zeae      | ...KVIVGVTSYGRS.....   | FKMAS.....    | AGCYG.....              |               |
| EAA77156_G_zeae      | ...KVVVGISSYGRS.....   | FRMKD.....    | PKCTG.....              |               |
| 12510_S_sclerotioru  | ...QVVLGLGFYGRS.....   | FSVSS.....    | PSCIE.....              |               |
| 00773_S_sclerotioru  | ...KVNGLGLAFYGRS.....  | FTIAS.....    | SNCDT.....              |               |
| 05454_S_sclerotioru  | ...KLNMLGLGFYGRS.....  | FQLAD.....    | PSCSK.....              |               |

|                      |                       |                |             |
|----------------------|-----------------------|----------------|-------------|
| 00677_S._sclerotioru | ...KLNLGLAAYGRG.....  | YTLSN.....     | PGCHE.....  |
| 02128_S._sclerotioru | ...KVIIVGVTSYGRS..... | FQMAT.....     | PGCYL.....  |
| MGG_04534_M._grisea  | ...RVNLGLGFYGRS.....  | FTMKD.....     | PNCMS.....  |
| MGG_01336_M._grisea  | ...KINLGLASYGRG.....  | YTLRS.....     | SSCAS.....  |
| 14527_P._nodorum     | ...NVVLGQGWWYGRS..... | FTLKD.....     | SSCNL.....  |
| 15411_P._nodorum     | ...KVNFGIAYYGRT.....  | YQLVD.....     | PSCDK.....  |
| 02214_P._nodorum     | ...KINMGIAN YGRG..... | YTVEK.....     | KECAY.....  |
| 04761_C._immitis     | ...KVNMLGLGFYGRS..... | FQLQD.....     | PACDK.....  |
| 04323_A._capsulatum  | ...KVSILGLAFYGRS..... | FTLAD.....     | PSCST.....  |
| 00533_B._fuckeliana  | ...KVNGLGLAAYGRG..... | YTLAN.....     | PGCAE.....  |
| Chi18_1_H._jecorina  | ...MITVGVSSYGRS.....  | FQMSS.....     | AGCWT.....  |
| Chi18_8_H._jecorina  | ...KIAVGVTSYGRS.....  | FRMAD.....     | QNCSE.....  |
| Chi18_9_H._jecorina  | ...KVVVGESSYGRS.....  | FKMAK.....     | AGCTG.....  |
| Chi18_10_H._jecorina | ...QVVVGVAS YGRS..... | FEMND.....     | PKCKG.....  |
| 02650_A._capsulatum  | ...RANLGF AFYVKW..... | FRTE DPTK..... | GSGCDK..... |
| AN0221_E._nidulans   | ...KLNLGLAAYYVKW..... | FKTVP.....     | GEQCAK..... |
| 06020_N._crassa      | ...KLNLGF AFYLYK..... | FKTEQ.....     | DACAQ.....  |
| EAA76014_G._zeae     | ...SVNLGLGY YVKW..... | FMTEK.....     | CDP.....    |
| Chi18_4_H._jecorina  | ...KLNLGLGY YAKW..... | FMTEK.....     | CDA.....    |
| 09277_P._nodorum     | ...RLNVGTAFYVKW.....  | FKTAN.....     | GKDCSA..... |
| 05838_A._capsulatum  | ...KINLGF AFYAKY..... | FTLDP.....     | KANCTS..... |
| EAA69039_G._zeae     | ...KLVLGIPFYAKY.....  | FMTKK.....     | GYTC.....   |
| MGG_06594_M._grisea  | ...KLNLGF AFYAKW..... | FTTAK.....     | GVEC.....   |
| Chi18_11_H._jecorina | ...KINLGF AFYAKW..... | FSTEA.....     | GYQC.....   |
| 02644_A_P._nodorum   | ...KLNLGF AYYAKY..... | FTTKP.....     | GCTS.....   |
| AN9447_E._nidulans   | ...KINLGF AYYAKW..... | FTTQS.....     | DVDCG.....  |

|                      | 670                                                         | 680 | 690 | 700 | 710 | 720    |
|----------------------|-------------------------------------------------------------|-----|-----|-----|-----|--------|
| NP_979924_B._cereus  | .... .... .... .... .... .... .... .... .... .... .... .... |     | QG  |     |     |        |
| YP_077302_B._licheni |                                                             |     | PG  |     |     |        |
| YP_091539_B._licheni |                                                             |     | PG  |     |     |        |
| YP_079121_B._licheni |                                                             |     | PG  |     |     |        |
| YP_074366_S._thermop |                                                             |     | PA  |     |     |        |
| YP_075811_S._thermop |                                                             |     | RG  |     |     |        |
| YP_075619_S._thermop |                                                             |     |     |     |     |        |
| ZP_01354047_C._phyto |                                                             |     | KG  |     |     |        |
| ZP_01354926_C._phyto |                                                             |     | LGN |     |     | P      |
| NP_902406_C._violace |                                                             |     |     |     |     |        |
| ZP_01136704_A._cellu |                                                             |     |     |     |     |        |
| ZP_00526542_S._usita |                                                             |     | DKD |     |     | P      |
| AAF46212.1_D._melano |                                                             |     | IG  |     |     | AP     |
| AAF46534.1_D._melano |                                                             |     | TG  |     |     | LPPVAE |
| AAF46544.1_D._melano |                                                             |     | LG  |     |     | AP     |
| At4g19720_A._thalian |                                                             |     | ND  |     |     | AA     |
| At4g19750_A._thalian |                                                             |     | YD  |     |     | AA     |
| EAA67655_G._zeae     |                                                             |     | GLG |     |     | KPYDG  |
| EAA73155_G._zeae     |                                                             |     | GLG |     |     | QGYSG  |
| EAA74986_G._zeae     |                                                             |     | GIG |     |     | KSFSD  |
| EAA74223_G._zeae     |                                                             |     | GPG |     |     | RPYQG  |
| MGG_05533_M._grisea  |                                                             |     | GLG |     |     | KGYTA  |
| MGG_01247_M._grisea  |                                                             |     | GLG |     |     | KPFSG  |
| MGG_00086_M._grisea  |                                                             |     | GPG |     |     | GAYSG  |
| MGG_07927_M._grisea  |                                                             |     | GPG |     |     | APFQG  |
| Chi18_6_H._jecorina  |                                                             |     | GPG |     |     | KPYEG  |
| Chi18_5_H._jecorina  |                                                             |     | GIG |     |     | QFPTG  |
| Chi18_7_H._jecorina  |                                                             |     | GPG |     |     | KPYSG  |
| 04883_N._crassa      |                                                             |     | GPG |     |     | TAYSG  |
| 04554_N._crassa      |                                                             |     | GLG |     |     | QPYSG  |
| 11407_B._fuckeliana  |                                                             |     | GMG |     |     | LTENG  |
| 05350_B._fuckeliana  |                                                             |     | GLG |     |     | RPFNG  |
| 11700_S._sclerotioru |                                                             |     | GLG |     |     | MQATG  |

|                      |                                         |             |
|----------------------|-----------------------------------------|-------------|
| 11304_S._sclerotioru | .....GLG.....                           | KPFNG.....  |
| 08020_S._sclerotioru | .....GLD.....                           | QSFQG.....  |
| 01250_A._capsulatum  | .....GPG.....                           | KPFQG.....  |
| 05886_A._capsulatum  | .....GPG.....                           | TPFTG.....  |
| 06565_A._capsulatum  | .....GPG.....                           | TPFHG.....  |
| 05250_C._immitis     | .....GPG.....                           | SPFQG.....  |
| 02795_C._immitis     | .....GIG.....                           | TSFNG.....  |
| 03822_C._immitis     | .....GPG.....                           | KPYQG.....  |
| AN5454_E._nidulans   | .....GPG.....                           | TEFEG.....  |
| AN4871_E._nidulans   | .....GPG.....                           | RPYSG.....  |
| 00269_P._nodorum     | .....GPG.....                           | KPFSG.....  |
| 04870.1_C._cinereus  | .....GPG.....                           | HAFVG.....  |
| 09921.1_C._cinereus  | .....GLG.....                           | APYSG.....  |
| 124149_P._chrysospor | .....GPG.....                           | TPFQG.....  |
| 134311_P._chrysospor | .....GIG.....                           | APYNG.....  |
| 03412_F._neoformans  | .....GIG.....                           | SPFSG.....  |
| 13635_R._oryzae      | .....GPE.....                           | QAFQG.....  |
| UM04261_U._maydis    | .....GPQ.....                           | QPYRG.....  |
| EAA69503_G._zeae     | .....GAG.....                           | HKYKG.....  |
| EAA70860_G._zeae     | .....GPG.....                           | HPFKG.....  |
| Chi18_3_H._jecorina  | .....GPG.....                           | QEFNG.....  |
| Chi18_2_H._jecorina  | .....GPG.....                           | CSTEK.....  |
| 03026_N._crassa      | .....GSG.....                           | HKFQG.....  |
| 01594_B._fuckeliana  | .....GPG.....                           | HPYQG.....  |
| 05897_S._sclerotioru | .....GPG.....                           | HPYHG.....  |
| 04742_A._capsulatum  | .....GIN.....                           | QPYER.....  |
| 04750_C._immitis     | .....GVGQT.....                         | HCISN.....  |
| 04719_P._nodorum     | .....GVG.....                           | HGFSG.....  |
| MGG_08458_M._grisea  | .....ALG.....                           | AGFSE.....  |
| CHT4_C._albicans     | .....EIG.....                           | VPFTK.....  |
| 01119_L._elongisporu | .....HVG.....                           | SKFAK.....  |
| XP_454053_K._lactis  | .....YLG.....                           | KKYHG.....  |
| CTS2_S._cerevisiae   | .....LIN.....                           | KIFKG.....  |
| 246746_L._bicolor    | .....GPG.....                           | SVFSG.....  |
| 03209_N._crassa      | .....GLG.....                           | KPYSG.....  |
| 14474_P._nodorum     | .....GLG.....                           | QKFNG.....  |
| CE06282_C._elegans   | .....SK.....                            | RGVYRH..... |
| CE03547_C._elegans   | .....PN.....                            | IEIYRN..... |
| CE03542_C._elegans   | .....LK.....                            | TEVFRN..... |
| CE15845_B_C._elegans | .....NG.....                            | RDLFIH..... |
| CE02997_C._elegans   | .....DS.....                            | DDIWKD..... |
| CE36953_C._elegans   | .....ST.....                            | DDMWRT..... |
| YP_432439_H._chejuen | .....NCPPGTGTGDKNDCGHGAVGIDNIWHD.....   |             |
| YP_529449.1_S._degra | .....ECPVGTGGSATSKCGNGAVGIDNLWHD.....   |             |
| YP_077582_B._licheni | .....DCPQG.....LRQCGDGATGIDNIWHD.....   |             |
| ChiI_S._coelicolor   | .....TCPAGSG.....LTKCGDGAVGIDNLWHD..... |             |
| NP_902986_C._violace | .....NCPAG.....LTECGDGAVGIDNIWHD.....   |             |
| ZP_01159608_Photobac | .....ECQAGTGEGEKNNCGYGAIGIDNMWHD.....   |             |
| ZP_01234708_V._angus | .....ECQAGTGEGEKNNCGYGAIGIDNMWHD.....   |             |
| NP_233087_V._cholera | .....LCAPGTGEGEKNNCGHGATGIDNMWHD.....   |             |
| NP_230718_V._cholera | .....SCPEG.....TTVCGWGAEGTDNIWHD.....   |             |
| AAO07185_V._vulnific | .....ECAPGTGEGEKNNCGHGAMGIDNMWHD.....   |             |
| ZP_01354150_C._phyto | .....G.....                             | LFQAA.....  |
| ZP_01246933_F._johns | .....G.....                             | LYQAG.....  |
| YP_012734_L._monocyt | .....PG.....                            | LFQAA.....  |
| YP_529337.1_A_S._deg | .....TPNG.....                          | DPYVG.....  |
| ChiA_A_P._kodakarae  | .....G.....                             | LYQPF.....  |
| AAG19274_Halobacteri | .....G.....                             | LYQPF.....  |
| AAG19275_Halobacteri | .....P.....                             | KYQN.....   |
| CE03543_C._elegans   | .....PR.....                            | TEVFRN..... |
| CE34961_C._elegans   | .....SG.....                            | TEVFRR..... |
| CE20043_C._elegans   | .....PG.....                            | RQVFRD..... |



|                      |                                       |             |
|----------------------|---------------------------------------|-------------|
| CE15845_A_C._elegans | .....SN.....                          | TEVFRN..... |
| CE32863_A_C._elegans | .....SN.....                          | TEVFRN..... |
| CE03544_C._elegans   | .....NR.....                          | TEVFRN..... |
| CE08731_C._elegans   | .....PG.....                          | IEVFRN..... |
| CE28638_C._elegans   | .....                                 | VADA.....   |
| CE32863_B_C._elegans | .....NG.....                          | RDLFIH..... |
| CE01673_C._elegans   | .....                                 | .....       |
| CE02993_C._elegans   | .....DF.....                          | DDIFKD..... |
| CE02996_C._elegans   | .....YS.....                          | DDIWKE..... |
| CE02995_C._elegans   | .....DS.....                          | DDIFKD..... |
| CE02992_C._elegans   | .....Q.....                           | DDIWKV..... |
| CE02999_C._elegans   | .....                                 | KGWVWP..... |
| CE02998_C._elegans   | .....                                 | DEMFKE..... |
| CE09229_C._elegans   | .....S.....                           | DNMWRT..... |
| CE12928_C._elegans   | .....S.....                           | DNMWRT..... |
| CE23907_C._elegans   | .....PG.....                          | RDVFRY..... |
| CE32917_C._elegans   | .....PG.....                          | REVYRN..... |
| CE34579_C._elegans   | .....PG.....                          | KEVYRN..... |
| CE25073_C._elegans   | .....PN.....                          | IEIYRN..... |
| CE03548_C._elegans   | .....PN.....                          | IEIYRN..... |
| NP_469498_L._innocua | .....PG.....                          | LFQAA.....  |
| CE08730_C._elegans   | .....PG.....                          | IEVFRN..... |
| Q8U1H4_P._furiosus   | .....                                 | .....       |
| CE12474_C._elegans   | .....NR.....                          | TEVFRN..... |
| CE02990_C._elegans   | .....DS.....                          | DNWKV.....  |
| CE40270_C._elegans   | .....K.....                           | IEIFRN..... |
| CE40296_C._elegans   | .....DS.....                          | DDIFKD..... |
| ChiB_S._marcescens   | .....TPGE.....                        | DPYPN.....  |
| O10363_O._pseudotsug | .....D.....                           | KYFSG.....  |
| AAP29899_C._fumifera | .....D.....                           | NYFTG.....  |
| AAV73807_B._mori_NPV | .....G.....                           | NYFSG.....  |
| AAL56186_H._zea_SNPV | .....D.....                           | NPFSG.....  |
| AAF33549_S._exigua_N | .....D.....                           | NPFLG.....  |
| AAZ38189_A._segetum  | .....E.....                           | NPFLG.....  |
| AAS82706_A._segetum  | .....N.....                           | NPFTG.....  |
| ZP_01159013_Photobac | .....PT.....                          | DPMTG.....  |
| ZP_01161077_Photobac | .....N.....                           | NPMTG.....  |
| ZP_01159325_Photobac | .....PK.....                          | ELSST.....  |
| ZP_01160869_Photobac | .....EG.....                          | LSSK.....   |
| ZP_01233025_V._angus | .....PT.....                          | DPMTG.....  |
| ZP_01236284_V._angus | .....N.....                           | NPMTG.....  |
| ZP_01235109_V._angus | .....PK.....                          | ELSST.....  |
| ZP_01235465_V._angus | .....EG.....                          | LSSK.....   |
| AAO08114_V._vulnific | .....PN.....                          | DPMTG.....  |
| AAO07498_V._vulnific | .....KG.....                          | DLLSE.....  |
| NP_232428_V._cholera | .....PN.....                          | DPMTG.....  |
| YP_432951_H._chejuen | .....NQ.....                          | APGTT.....  |
| YP_529337.1_B_S._deg | .....DL.....                          | FPLYG.....  |
| YP_435912_H._chejuen | .....T.....                           | DPFAG.....  |
| ZP_01137509_A._cellu | .....G.....                           | LYQPA.....  |
| ChiE_S._coelicolor   | .....G.....                           | EWQDA.....  |
| ChiC_S._coelicolor   | .....                                 | GGTA.....   |
| ChiD_S._coelicolor   | .....                                 | GGTA.....   |
| NP_903910_C._violace | .....G.....                           | LYQVA.....  |
| YP_529072.1_S._degra | .....                                 | GGSA.....   |
| ZP_01431615_S._tropi | .....                                 | GGTA.....   |
| ZP_01136287_A._cellu | .....G.....                           | LYQTA.....  |
| 01315.1_C._cinereus  | .....SVLASV.PPFDG.....VDRPIG.....     | DSWD.....   |
| 03252.1_C._cinereus  | .....SQLNAY.PSYSP.....ADKRKG.....     | DRWD.....   |
| 05285.1_C._cinereus  | .....NIVTFNPAFDK.....ESYPLG.....      | EGEVE.....  |
| 05291.1_C._cinereus  | .....ELTPY.AQFDK.....SKQPLG.....      | EGETG.....  |
| 01586.1_C._cinereus  | LDGNGEITFLNGAHPRPKDGAIQSVAVENADG..... | EGSIA.....  |

|                      |                                                |
|----------------------|------------------------------------------------|
| 128098_P._chrysospor | ...GT..TLLAAY.PPVAN.....SSNPQG.....DPTDV.....  |
| 39872_P._chrysospori | .....NTLAAY.PAFNS.....TSFPLG.....DGWD.....     |
| 138098_P._chrysospor | QPPGT..TPVAPY.PPFD A.....AQQPMG.....DVWDE..... |
| 129436_P._chrysospor | .....SG.....TDGAG.....SAGVP.....               |
| EAA71245_G._zeae     | ...KN..HKLNLY.PAONS.....TDRFQG.....SSWD.....   |
| MGG_04732_M._grisea  | ...KP..FPLSAY.PKNNG.....TRR.QG.....SSWD.....   |
| UM06190_U._maydis    | .....RSRS.....SSSQRR.....AAKLT.....            |
| 04245_F._neoformans  | .....LL.....PHKR.....SKHAK.....KASHV.....      |
| 16170_R._oryzae      | .....GMYVKLDG.....HT.QIKG.....DKYDE.....       |
| 01334_R._oryzae      | .....GMYVKLDG.....HT.QIKG.....DKHDE.....       |
| 13934_R._oryzae      | .....GIHVPFDR.....KIPQIKG.....DSYDD.....       |
| 07611_R._oryzae      | .....K.TQYNPAVS.....PNPPLG.....DQLDG.....      |
| 10252_R._oryzae      | .....T.NQYQPSQ.....LGAPKG.....DSDDA.....       |
| 14659_R._oryzae      | .....K.SLYQDQVQ.....GKIPQG.....DQDDT.....      |
| 231399_L._bicolor    | .....PFLASH.PPFVK.....TRE.....DPRP.....        |
| 180319_L._bicolor    | .....QLAPY.PTFVK.....SPQTPG.....EGETA.....     |
| 191848_L._bicolor    | .....QLAAY.PAFSK.....AAQPAG.....EGETS.....     |
| 317003_L._bicolor    | DHGG...HFLNGAHPVSKK.....QPNQNN.....EAGLA.....  |
| 246840_L._bicolor    | .....SILAPY.PAYNV.....SNTPPG.....DKWS.....     |
| 144643_L._bicolor    | .....S.....RHQVR.....SASVK.....                |
| 310136_L._bicolor    | .....NVNLY.PSF DK.....SQQPLG.....DS DTS.....   |
| 629882_M._xanthus    | SD.....                                        |
| 630509_A.M._xanthus  | .....                                          |
| YP_592598_Acidobacte | .....YCPSG.....D.....                          |
| YP_446903_S._ruber   | .....G.....LYQC.....                           |
| ZP_00739282_B._thuri | .....G.....QYQPC.....                          |
| ZP_01245639_F._johns | .....G.....LFVAA.....                          |
| NP_976824_B._cereus  | .....G.....QYQPC.....                          |
| YP_077581_B._licheni | .....G.....EYQKC.....                          |
| 631138_M._xanthus    | .....G.....LFQSG.....                          |
| ZP_01247029_F._johns | .....                                          |
| ZP_01234549_V._angus | .....                                          |
| ZP_01160697_Photobac | .....                                          |
| ZP_01158584_Photobac | .....                                          |
| AN0549_E._nidulans   | .....PG.....CTFV.....                          |
| AN8481_E._nidulans   | .....PG.....CLFQ.....                          |
| AN9390_E._nidulans   | .....PG.....CGFS.....                          |
| AN0517_E._nidulans   | .....PNGE.....CEFS.....                        |
| AN0541_E._nidulans   | .....PG.....CEFS.....                          |
| AN5077_E._nidulans   | .....PG.....CPFD.....                          |
| AN0509_E._nidulans   | .....PE.....CLYTGSRA.....A                     |
| AN7613_E._nidulans   | .....PE.....CKFTGP.....                        |
| 07035_N._crassa      | .....PG.....CPIS.....                          |
| 07484_N._crassa      | .....KD.....CFFTGSA...T                        |
| 05317_N._crassa      | .....PS.....CTFTGDR...T                        |
| EAA74768_G._zeae     | .....PG.....CQFN.....                          |
| EAA78168_G._zeae     | .....PG.....CPYL.....                          |
| EAA75711_G._zeae     | .....LG.....CSFV.....                          |
| EAA68447_G._zeae     | .....PD.....CFYTGSK...I                        |
| EAA77156_G._zeae     | .....VT.....CQFTGSF...S                        |
| 12510_S._sclerotioru | .....PG.....CTYE.....                          |
| 00773_S._sclerotioru | .....PG.....CAYL.....                          |
| 05454_S._sclerotioru | .....PG.....CIFK.....                          |
| 00677_S._sclerotioru | .....QG.....CAYT.....                          |
| 02128_S._sclerotioru | .....DS.....CTYTGP.....                        |
| MGG_04534_M._grisea  | .....AG.....CEFT.....                          |
| MGG_01336_M._grisea  | .....LDAN.....CGFT.....                        |
| 14527_P._nodorum     | .....PNGV.....CQFS.....                        |
| 15411_P._nodorum     | .....MG.....CRFI.....                          |
| 02214_P._nodorum     | .....FG.....CTYT.....                          |
| 04761_C._immitis     | .....PG.....CVFK.....                          |
| 04323_A._capsulatum  | .....PG.....CPFKKVDNET.....                    |

|                      |                 |             |
|----------------------|-----------------|-------------|
| 00533_B._fuckeliana  | .....IG.....    | CAYT.....   |
| Chi18_1_H._jecorina  | .....EQ.....    | CTYTG.....  |
| Chi18_8_H._jecorina  | .....PM.....    | CTFLGGK...L |
| Chi18_9_H._jecorina  | .....PL.....    | CKFTGAN...G |
| Chi18_10_H._jecorina | .....PM.....    | CTFTG.....P |
| 02650_A._capsulatum  | .....N.PIG..... | CKTVL.....  |
| AN0221_E._nidulans   | .....Q.PIG..... | CPTVL.....  |
| 06020_N._crassa      | .....TSPVG..... | CPTVE.....  |
| EAA76014_G._zeae     | .....AKPVG..... | CRTPI.....  |
| Chi18_4_H._jecorina  | .....QQPLG..... | CRTQL.....  |
| 09277_P._nodorum     | .....Q.ATG..... | CPTL.....   |
| 05838_A._capsulatum  | .....EKPVG..... | CPIVH.....  |
| EAA69039_G._zeae     | .....TEPIG..... | CPTL.....   |
| MGG_06594_M._grisea  | .....TTSTG..... | CETAL.....  |
| Chi18_11_H._jecorina | .....TTPTG..... | CPTAL.....  |
| 02644_A_P._nodorum   | .....NPPLG..... | CPIVL.....  |
| AN9447_E._nidulans   | .....TYPIG..... | CPTVA.....  |

|                      |                                                             |          |            |     |     |          |
|----------------------|-------------------------------------------------------------|----------|------------|-----|-----|----------|
|                      | 730                                                         | 740      | 750        | 760 | 770 | 780      |
|                      | .... .... .... .... .... .... .... .... .... .... .... .... |          |            |     |     |          |
| NP_979924_B._cereus  | NPPAK.....                                                  | AV.....  | SSV.....   |     |     | AAV..... |
| YP_077302_B._licheni | GPLAR.....                                                  | AI.....  | SPQ.....   |     |     | RAI..... |
| YP_091539_B._licheni | AVYP.....                                                   | GI.....  | ANQ.....   |     |     | DAV..... |
| YP_079121_B._licheni | AVYP.....                                                   | GI.....  | ANQ.....   |     |     | DAV..... |
| YP_074366_S._thermop | GEYAR.....                                                  | AI.....  | SPQ.....   |     |     | EAI..... |
| YP_075811_S._thermop | VTRAEE.....                                                 | TF.....  | SPV.....   |     |     | AAT..... |
| YP_075619_S._thermop | RQVVG.....                                                  | GL.....  | STG.....   |     |     | GAY..... |
| ZP_01354047_C._phyto | ETRAR.....                                                  | AI.....  | GNI.....   |     |     | EAV..... |
| ZP_01354926_C._phyto | ALASE.....                                                  | AV.....  | SMT.....   |     |     | SAE..... |
| NP_902406_C._violace | PGDGG.....                                                  | ML.....  | YWK.....   |     |     | DTQ..... |
| ZP_01136704_A._cellu | GGRAB.....                                                  | AV.....  | TYP.....   |     |     | QVV..... |
| ZP_00526542_S._usita | AVAAS.....                                                  | TI.....  | YAA.....   |     |     | DAV..... |
| AAF46212.1_D._melano | .ASGYGK.....                                                | CG.....  |            |     |     | QLG..... |
| AAF46534.1_D._melano | .ADGVAP.....                                                | AGT..... | QTQ.....   |     |     | IPG..... |
| AAF46544.1_D._melano | .AEGPGE.....                                                | QGD..... | ATR.....   |     |     | EKG..... |
| At4g19720_A._thalian | .TSRVAT.....                                                | SA.....  |            |     |     | EG.....  |
| At4g19750_A._thalian | .TDGAAI.....                                                | SS.....  |            |     |     | DG.....  |
| EAA67655_G._zeae     | ..VA.....                                                   | GS.....  | PAN.....   |     |     | LG.....  |
| EAA73155_G._zeae     | ..VG.....                                                   | SG.....  | SWE.....   |     |     | NG.....  |
| EAA74986_G._zeae     | ..VG.....                                                   | QG.....  | SWE.....   |     |     | RG.....  |
| EAA74223_G._zeae     | ..VG.....                                                   | EG.....  | TWE.....   |     |     | QG.....  |
| MGG_05533_M._grisea  | ..ST.....                                                   | AG.....  | SLEGQ..... |     |     | AG.....  |
| MGG_01247_M._grisea  | ..LG.....                                                   | DG.....  | SIE.....   |     |     | RG.....  |
| MGG_00086_M._grisea  | ..TG.....                                                   | PG.....  | SWE.....   |     |     | NG.....  |
| MGG_07927_M._grisea  | ..VG.....                                                   | QG.....  | TWE.....   |     |     | QG.....  |
| Chi18_6_H._jecorina  | ..VG.....                                                   | KG.....  | SIE.....   |     |     | KG.....  |
| Chi18_5_H._jecorina  | ..IG.....                                                   | SG.....  | SWE.....   |     |     | NG.....  |
| Chi18_7_H._jecorina  | ..IG.....                                                   | EG.....  | SWE.....   |     |     | NG.....  |
| 04883_N._crassa      | ..VG.....                                                   | EG.....  | SWE.....   |     |     | KG.....  |
| 04554_N._crassa      | ..VG.....                                                   | EG.....  | TWE.....   |     |     | NG.....  |
| 11407_B._fuckeliana  | ..IG.....                                                   | TG.....  | SWE.....   |     |     | SG.....  |
| 05350_B._fuckeliana  | ..VG.....                                                   | EG.....  | TWE.....   |     |     | NG.....  |
| 11700_S._sclerotioru | ..IG.....                                                   | PG.....  | SWE.....   |     |     | AG.....  |
| 11304_S._sclerotioru | ..VG.....                                                   | EG.....  | TWE.....   |     |     | NG.....  |
| 08020_S._sclerotioru | ..VG.....                                                   | QG.....  | TWA.....   |     |     | SG.....  |
| 01250_A._capsulatum  | ..VG.....                                                   | QG.....  | SWE.....   |     |     | NG.....  |
| 05886_A._capsulatum  | ..TGG.....                                                  | NG.....  | SFE.....   |     |     | PG.....  |
| 06565_A._capsulatum  | ..DGG.....                                                  | QG.....  | SFE.....   |     |     | KG.....  |
| 05250_C._immitis     | ..VG.....                                                   | EG.....  | SWE.....   |     |     | NG.....  |
| 02795_C._immitis     | ..VG.....                                                   | GG.....  | SWE.....   |     |     | NG.....  |
| 03822_C._immitis     | ..NGG.....                                                  | AG.....  | SWE.....   |     |     | PG.....  |
| AN5454_E._nidulans   | ..VGY.....                                                  | EG.....  | SFE.....   |     |     | AG.....  |

|                      |               |                   |              |           |       |
|----------------------|---------------|-------------------|--------------|-----------|-------|
| AN4871_E._nidulans   | ..IG.....     | QG.....           | TWE.....     | QG        |       |
| 00269_P._nodorum     | ..VG.....     | QG.....           | TWE.....     | AG        |       |
| 04870.1_C._cinereus  | ..IG.....     | EG.....           | TWE.....     | RG        |       |
| 09921.1_C._cinereus  | ..IG.....     | PG.....           | TIE.....     | PG        |       |
| 124149_P._chrysospor | ..LG.....     | PG.....           | SWE.....     | SG        |       |
| 134311_P._chrysospor | ..IG.....     | PG.....           | TTE.....     | AG        |       |
| 03412_F._neoformans  | ..TG.....     | EG.....           | SWE.....     | AG        |       |
| 13635_R._oryzae      | ..VP.....     | KG.....           | TWE.....     | EG        |       |
| UM04261_U._maydis    | ..TG.....     | QG.....           | TWE.....     | AG        |       |
| EAA69503_G._zeae     | ..IG.....     | G.....            | AED.....     | G         |       |
| EAA70860_G._zeae     | ..AG.....     |                   |              |           |       |
| Chi18_3_H._jecorina  | ..VG.....     | G.....            | QD.....      | G         |       |
| Chi18_2_H._jecorina  | ..AG.....     |                   |              |           |       |
| 03026_N._crassa      | ..AG.....     | G.....            | GDD.....     | G         |       |
| 01594_B._fuckeliana  | ..CG.....     | G.....            | EE.....      | G         |       |
| 05897_S._sclerotioru | ..CG.....     | G.....            | EE.....      | G         |       |
| 04742_A._capsulatum  | ..GT.....     | A.....            | GGE.....     | K         |       |
| 04750_C._immitis     | ..ET.....     | P.....            | EDK.....     | I         |       |
| 04719_P._nodorum     | ..QA.....     | G.....            | EE.....      | G         |       |
| MGG_08458_M._grisea  | ..AG.....     |                   |              |           |       |
| CHT4_C._albicans     | ..ERK.....    | SG.....           | CIEA.....    | D         |       |
| 01119_L._elongisporu | ..TDK.....    | ED.....           | TLGYNKI..... | KD        |       |
| XP_454053_K._lactis  | ..VGG.....    | G.....            | SEGE.....    | PG        |       |
| CTS2_S._cerevisiae   | ..VGKPTK..... | EIDK.....         | ADGK.....    | EG        |       |
| 246746_L._bicolor    | ..VG.....     | QG.....           | TWE.....     | AG        |       |
| 03209_N._crassa      | ..IG.....     | AG.....           | TLE.....     | PG        |       |
| 14474_P._nodorum     | ..SG.....     | EG.....           | TWE.....     | PG        |       |
| CE06282_C._elegans   | ..VAP.....    | FYG.....          | RTV.....     | GK        |       |
| CE03547_C._elegans   | ..AT.....     | FQG.....          | GVV.....     | GE        |       |
| CE03542_C._elegans   | ..AKL.....    | ING.....          | KAD.....     | GD        |       |
| CE15845_B_C._elegans | ..AD.....     |                   | K.....       | GA        |       |
| CE02997_C._elegans   | ..NNS.....    | GRL.....          | P.I.....     | A.        |       |
| CE36953_C._elegans   | ..ATA.....    | TNSEG.....        | TKFE.....    | GG        |       |
| YP_432439_H._chejuen | ..LDK.....    | QGNEM.....        | GAGS.....    | NP        |       |
| YP_529449.1_S._degra | ..KDE.....    | NGNEM.....        | GAGS.....    | NP        |       |
| YP_077582_B._licheni | ..KDE.....    | QGNEL.....        | GAGA.....    | NP        |       |
| ChiI_S._coelicolor   | ..LDT.....    | NGKES.....        | PAGS.....    | NP        |       |
| NP_902986_C._violace | ..LDD.....    | SGKEI.....        | PAGS.....    | NP        |       |
| ZP_01159608_Photobac | ..LDP.....    | DGKEM.....        | GAGS.....    | NP        |       |
| ZP_01234708_V._angus | ..LDP.....    | DGKEM.....        | GAGS.....    | NP        |       |
| NP_233087_V._cholera | ..VNA.....    | AGDEM.....        | GAGS.....    | NP        |       |
| NP_230718_V._cholera | ..VDA.....    | NGNEI.....        | KAGV.....    | VP        |       |
| AAO07185_V._vulnific | ..TDP.....    | KGNEI.....        | GAGS.....    | NP        |       |
| ZP_01354150_C._phyto | ..EAA.....    | ISHEES.....       | DFTYN.....   | NL        |       |
| ZP_01246933_F._johns | ..EHF.....    | QGV.....          | FK.....      | NY        |       |
| YP_012734_L._monocyt | ..EKT.....    | NKDADG.....       | SLTYG.....   | AN        |       |
| YP_529337.1_A_S._deg | ..DAS.....    | LLVGCEACEARG..... |              | EPR       |       |
| ChiA_A_P._kodakarae  | ..SG.....     | TPAG.....         | TW.....      | GPA.....  | YETYG |
| AAG19274_Halobacteri | ..DG.....     | TPDG.....         | TW.....      | G.....    | QDNG  |
| AAG19275_Halobacteri | ..DV.....     | IPPG.....         | TWNDL.....   | RGPD..... | DANTG |
| CE03543_C._elegans   | ..AEI.....    | RNN.....          | RAD.....     |           | GV    |
| CE34961_C._elegans   | ..ADL.....    | KNG.....          | AAV.....     |           | GN    |
| CE20043_C._elegans   | ..VEL.....    | VDN.....          | KPQ.....     |           | GE    |
| CE15845_A_C._elegans | ..ADL.....    | VNG.....          | IAV.....     |           | GE    |
| CE32863_A_C._elegans | ..ADL.....    | VNG.....          | IAV.....     |           | GE    |
| CE03544_C._elegans   | ..VEL.....    | KDN.....          | EVE.....     |           | GR    |
| CE08731_C._elegans   | ..VTL.....    | QDD.....          | RAI.....     |           | GE    |
| CE28638_C._elegans   | ..DE.....     |                   | NSE.....     |           | ES    |
| CE32863_B_C._elegans | ..AD.....     |                   | K.....       |           | GA    |
| CE01673_C._elegans   |               |                   |              |           |       |
| CE02993_C._elegans   | ..KNL.....    | TKG.....          | A.F.....     |           | A.    |
| CE02996_C._elegans   | ..KNV.....    | ARG.....          | P.F.....     |           | A.    |



|                      |               |             |             |          |
|----------------------|---------------|-------------|-------------|----------|
| CE02995_C._elegans   | ..QNS.....    | AKG.....    | G.F.....    | A.....   |
| CE02992_C._elegans   | ..AQN.....    | ENG.....    | PGK.....    | S.....   |
| CE02999_C._elegans   | ..DDS.....    | AQG.....    | P.Y.....    | S.....   |
| CE02998_C._elegans   | ..ADL.....    | ING.....    | KAQ.....    | GM.....  |
| CE09229_C._elegans   | ..AAP.....    | QNG.....    | KYE.....    | GG.....  |
| CE12928_C._elegans   | ..AAP.....    | QNG.....    | KYE.....    | GG.....  |
| CE23907_C._elegans   | ..VAS.....    | NNG.....    | MTI.....    | GQ.....  |
| CE32917_C._elegans   | ..VHL.....    | VHG.....    | SAV.....    | GE.....  |
| CE34579_C._elegans   | ..VTL.....    | IDG.....    | KAV.....    | GE.....  |
| CE25073_C._elegans   | ..AT.....     | FQG.....    | GVV.....    | GE.....  |
| CE03548_C._elegans   | ..AT.....     | FNG.....    | TVF.....    | GE.....  |
| NP_469498_L._innocua | ..EKT.....    | NKDADG..    | SLTYG.....  | AN.....  |
| CE08730_C._elegans   | ..VTL.....    | QNN.....    | GAI.....    | GE.....  |
| Q8U1H4_P._furius     | .....         | .....       | .....       | .....    |
| CE12474_C._elegans   | ..AEL.....    | KNN.....    | MAE.....    | GR.....  |
| CE02990_C._elegans   | ..NES.....    | GRL.....    | A.V.....    | A.....   |
| CE40270_C._elegans   | ..VNK.....    | VHG.....    | KIV.....    | GQ.....  |
| CE40296_C._elegans   | ..QNS.....    | AKG.....    | G.F.....    | A.....   |
| ChiB_S._marcescens   | ..ADY.....    | WLVGCD      | ECVRDK..    | DPR..... |
| O10363_O._pseudotsug | ..TAD.....    | GPVPG.....  | TWE.....    | NG.....  |
| AAP29899_C._fumifera | ..TAA.....    | GPVTG.....  | TWE.....    | DG.....  |
| AAV73807_B._mori NPV | ..TGN.....    | GPVSG.....  | TWE.....    | DG.....  |
| AAL56186_H._zea SNPV | ..VAV.....    | GPITG.....  | TWE.....    | NG.....  |
| AAF33549_S._exigua N | ..VAD.....    | GPVPG.....  | TWE.....    | AG.....  |
| AAZ38189_A._segetum  | ..VAT.....    | GPVPG.....  | TWE.....    | AG.....  |
| AAS82706_A._segetum  | ..VAQ.....    | GPIKG.....  | TWE.....    | SG.....  |
| ZP_01159013_Photobac | ..TGT.....    | GKLTGSKA    | QGVWE.....  | DG.....  |
| ZP_01161077_Photobac | ..KGT.....    | GPVKG.....  | TWE.....    | DG.....  |
| ZP_01159325_Photobac | ..QGA.....    | SFGTS.....  | AQE.....    | PG.....  |
| ZP_01160869_Photobac | ..GTI.....    | DKGSD.....  | IAD.....    | PG.....  |
| ZP_01233025_V._angus | ..TGT.....    | GKLTGSKA    | QGVWE.....  | DG.....  |
| ZP_01236284_V._angus | ..KGT.....    | GPVKG.....  | TWE.....    | DG.....  |
| ZP_01235109_V._angus | ..QGA.....    | SFGTS.....  | AQE.....    | PG.....  |
| ZP_01235465_V._angus | ..GTM.....    | DKGSD.....  | IAD.....    | PG.....  |
| AAO08114_V._vulnific | ..TAT.....    | GKLTGSKA    | QGVWE.....  | DG.....  |
| AAO07498_V._vulnific | ..QGA.....    | QFGTG.....  | EN.....     | G.....   |
| NP_232428_V._cholera | ..VGN.....    | GKLTGSKA    | QGVWE.....  | AG.....  |
| YP_432951_H._chejuen | ..NFI.....    | LAIAG.....  | YGSWE.....  | AG.....  |
| YP_529337.1_B_S._deg | ..QAS.....    | GAAKG.....  | TWE.....    | AG.....  |
| YP_435912_H._chejuen | ..TGG.....    | GKHAG.....  | TWE.....    | DG.....  |
| ZP_01137509_A._cellu | ..TG.....     | PAPG.....   | HQY.....    | SGN..... |
| ChiE_S._coelicolor   | ..GG.....     | AAPG.....   | QFP.....    | AEA..... |
| ChiC_S._coelicolor   | ..TG.....     | PATG.....   | TYE.....    | AG.....  |
| ChiD_S._coelicolor   | ..NG.....     | PAKG.....   | TYE.....    | NG.....  |
| NP_903910_C._violace | ..TG.....     | PAKG.....   | TYE.....    | QG.....  |
| YP_529072.1_S._degra | ..NG.....     | AAPG.....   | TYE.....    | KG.....  |
| ZP_01431615_S._tropi | ..TG.....     | AAPG.....   | TYE.....    | PG.....  |
| ZP_01136287_A._cellu | ..TG.....     | PSWL.....   | NGG.....    | SP.....  |
| 01315.1_C._cinereus  | ..GPGGG.....  | TDVCGS..... | PTL.....    | PGG..... |
| 03252.1_C._cinereus  | ..GEGG.....   | MDVCGV..... | TWG.....    | PGG..... |
| 05285.1_C._cinereus  | ..GQV.L.....  | TDKCGR..... | PEF.....    | PAG..... |
| 05291.1_C._cinereus  | ..EQT.....    | VDQCGV..... | ASG.....    | PSG..... |
| 01586.1_C._cinereus  | ..AASKDGDEG   | KKKADGLV    | TVQAADLRR.. | WWG..... |
| 128098_P._chrysospor | ..WSAGGA..... | VDECGR..... | VTQPG.....  | WGG..... |
| 39872_P._chrysospori | ..GPQG.....   | TDVCGV..... | TNNN.....   | PGG..... |
| 138098_P._chrysospor | ..ASPAG.....  | TDACGN..... | PVAGG.....  | FSG..... |
| 129436_P._chrysospor | ..VVLN.....   | EDGN.....   | AAD.....    | G.....   |
| EAA71245_G._zeae     | ..NDPL.....   | IDACGN..... | PNP.....    | PGG..... |
| MGG_04732_M._grisea  | ..DDPA.....   | VDACGA..... | AQP.....    | AGG..... |
| UM06190_U._maydis    | ..SSD.....    | GS.....     | TSS.....    | G.....   |
| 04245_F._neoformans  | ..TVQN.....   | ESGG.....   | TTD.....    | G.....   |
| 16170_R._oryzae      | ..SDADP.....  | CPN.....    | CKPS.....   | YTG..... |

|                      |               |                |                               |          |
|----------------------|---------------|----------------|-------------------------------|----------|
| 01334_R._oryzae      | .LAADP.....   | CPN.....       | ATPG.....                     | YTG      |
| 13934_R._oryzae      | .FAADP.....   | CPG.....       | ANRS.....                     | FSG      |
| 07611_R._oryzae      | .PWQDA.....   | YCSSL.....     | DSQS.....                     | ASG      |
| 10252_R._oryzae      | .YWQDP.....   | YCNV.....      | EPGG.....                     | LSG      |
| 14659_R._oryzae      | .FSQDP.....   | YCSK.....      | DPGG.....                     | LSG      |
| 231399_L._bicolor    | .CSEDR.....   | IDECAL.....    | APL.....                      | VQG      |
| 180319_L._bicolor    | .DTK.T.....   | TDSCGV.....    | TSG.....                      | PTG      |
| 191848_L._bicolor    | .TTS.T.....   | TDQCGT.....    | TSG.....                      | PTG      |
| 317003_L._bicolor    | .PAN.....     | LQS.....       | WWG.....                      | Q        |
| 246840_L._bicolor    | .GVGG.....    | IDVCGI.....    | SEG.....                      | PGG      |
| 144643_L._bicolor    | .VVD.....     | EDG.....       | GSD.....                      | S        |
| 310136_L._bicolor    | .TSASV.....   | LDPCGQ.....    | PEG.....                      | ISG      |
| 629882_M._xanthus    | .....         | YV.....        | GSD.....                      | N        |
| 630509_A_M._xanthus  | .....         | .....          | .....                         | .....    |
| YP_592598_Acidobacte | .....         | CSA.....       | APS.....                      | .....    |
| YP_446903_S._ruber   | .YD.....      | TSRG.....      | SYS.....                      | YDT..... |
| ZP_00739282_B._thuri | .KPG.....     | SDGKLASKG..... | TWD.....                      | DYS..... |
| ZP_01245639_F._johns | .PRYIVPG..... | CTNPQNPTG..... | TWDGSGACEKSGSIEICDLVGNPVTNSHA | TGDTG    |
| NP_976824_B._cereus  | .KPG.....     | SDGKLASKG..... | TWD.....                      | DYS..... |
| YP_077581_B._licheni | .GP.....      | AKEG.....      | TWE.....                      | K.....   |
| 631138_M._xanthus    | .VP.....      | TRG.....       | TWD.....                      | DGS..... |
| ZP_01247029_F._johns | .....         | A.....         | SAN.....                      | Q        |
| ZP_01234549_V._angus | .....         | .....          | .....                         | H        |
| ZP_01160697_Photobac | .....         | .....          | .....                         | H        |
| ZP_01158584_Photobac | .....         | .....          | .....                         | H        |
| AN0549_E._nidulans   | .SGGN.....    | AGN.....       | CSN.....                      | EVG      |
| AN8481_E._nidulans   | .SGGN.....    | AGP.....       | CSN.....                      | EVG      |
| AN9390_E._nidulans   | .AGGN.....    | PGK.....       | CSA.....                      | SAG      |
| AN0517_E._nidulans   | .DGGK.....    | PGS.....       | CSD.....                      | TTG      |
| AN0541_E._nidulans   | .DAGL.....    | RGE.....       | CSG.....                      | ESG      |
| AN5077_E._nidulans   | .GPGA.....    | GGR.....       | CTA.....                      | TPG      |
| AN0509_E._nidulans   | NSDAT.....    | KGP.....       | CTG.....                      | TAG      |
| AN7613_E._nidulans   | RTAAI.....    | PGM.....       | CTR.....                      | TPG      |
| 07035_N._crassa      | .SGGN.....    | AGK.....       | CSG.....                      | TTG      |
| 07484_N._crassa      | ASDAS.....    | KGP.....       | CTD.....                      | TAG      |
| 05317_N._crassa      | NSYAK.....    | PGV.....       | CTG.....                      | TAG      |
| EAA74768_G._zeae     | .GPAN.....    | AGK.....       | CSA.....                      | EKG      |
| EAA78168_G._zeae     | .SAGD.....    | AG.....        | CSG.....                      | EAG      |
| EAA75711_G._zeae     | .GPSE.....    | KGE.....       | CTD.....                      | SDG      |
| EAA68447_G._zeae     | HSDAK.....    | EGK.....       | CTG.....                      | QAG      |
| EAA77156_G._zeae     | VSEAE.....    | PGV.....       | CTG.....                      | EPG      |
| 12510_S._sclerotioru | .SGGM.....    | KGK.....       | CSR.....                      | EVG      |
| 00773_S._sclerotioru | .SAGD.....    | EGV.....       | CSA.....                      | SAG      |
| 05454_S._sclerotioru | .GGAS.....    | PGP.....       | CTA.....                      | NSG      |
| 00677_S._sclerotioru | .GPSI.....    | PGP.....       | CTT.....                      | QMG      |
| 02128_S._sclerotioru | TSGAY.....    | AGA.....       | CTQ.....                      | TP.      |
| MGG_04534_M._grisea  | .DGAK.....    | GGE.....       | CTG.....                      | TPG      |
| MGG_01336_M._grisea  | .GPSAG.....   | GD.....        | CQR.....                      | SPG      |
| 14527_P._nodorum     | .GGAN.....    | PGP.....       | CSN.....                      | AAG      |
| 15411_P._nodorum     | .GGSAGA.....  | AGS.....       | CTA.....                      | FPG      |
| 02214_P._nodorum     | .GPSK.....    | AGS.....       | CTL.....                      | QEG      |
| 04761_C._immitis     | .GGAA.....    | KGA.....       | CSG.....                      | ESG      |
| 04323_A._capsulatum  | AGGAQ.....    | PGL.....       | CTL.....                      | NSG      |
| 00533_B._fuckeliana  | .GLSE.....    | PGP.....       | CST.....                      | EAG      |
| Chi18_1_H._jecorina  | DSGAL.....    | PGP.....       | CTN.....                      | TSG      |
| Chi18_8_H._jecorina  | DSKAY.....    | KGR.....       | CTG.....                      | TAG      |
| Chi18_9_H._jecorina  | KSEAA.....    | AGR.....       | CTN.....                      | ARG      |
| Chi18_10_H._jecorina | QSLAA.....    | PGG.....       | CTN.....                      | SSG      |
| 02650_A._capsulatum  | .LEDP.....    | NTGE.....      | STG.....                      | QAG      |
| AN0221_E._nidulans   | .MEDP.....    | DTGA.....      | DLG.....                      | QAG      |
| 06020_N._crassa      | .MEDP.....    | VSGA.....      | DLG.....                      | RSB      |
| EAA76014_G._zeae     | .LEDP.....    | ETGA.....      | DLG.....                      | KTG      |

|                      |            |          |          |     |
|----------------------|------------|----------|----------|-----|
| Chi18_4_H._jecorina  | .LEDP..... | TSGA.... | DLG..... | RTG |
| 09277_P._nodorum     | .MEDP..... | KTGA.... | DLG..... | KAG |
| 05838_A._capsulatum  | .GEF.....  | ENGT.... | DAG..... | TSG |
| EAA69039_G._zeae     | .LENP..... | EDGS.... | DTG..... | KSG |
| MGG_06594_M._grisea  | .LEDA..... | E.GN.... | DTG..... | LSG |
| Chi18_11_H._jecorina | .LENP..... | D.GS.... | DPL..... | VSG |
| 02644_A_P._nodorum   | .AEDP..... | VTGK.... | DTL..... | TSG |
| AN9447_E._nidulans   | .MEA.....  | ADGS.... | DNG..... | KSG |

|                      | 790        | 800 | 810    | 820 | 830             | 840 |
|----------------------|------------|-----|--------|-----|-----------------|-----|
| NP_979924_B._cereus  | ALARKYNVP  |     | IRYDFT |     |                 |     |
| YP_077302_B._licheni | ETASENNAA  |     | IQYDET |     |                 |     |
| YP_091539_B._licheni | QLAMKHQAP  |     | IQYDTN |     |                 |     |
| YP_079121_B._licheni | QLAMKHQAP  |     | IQYDTN |     |                 |     |
| YP_074366_S._thermop | RQAARRGAA  |     | IEFDTR |     |                 |     |
| YP_075811_S._thermop | NRAIDVGAW  |     | IQYDED |     |                 |     |
| YP_075619_S._thermop | SLAARHGAE  |     | VRWDDE |     |                 |     |
| ZP_01354047_C._phyto | QIAAANNVAV |     | IQFDEV |     |                 |     |
| ZP_01354926_C._phyto | KTLEANKAT  |     | KSWDQT |     |                 |     |
| NP_902406_C._violace | ALIARYGAQ  |     | PRYDAG |     |                 |     |
| ZP_01136704_A._cellu | NLVAQYHAT  |     | PRWSAP |     |                 |     |
| ZP_00526542_S._usita | DLAKAIDAT  |     | VQWDPL |     |                 |     |
| AAF46212.1_D._melano | FTTLTETCE  |     | CVTKFF |     | KPNLSY.D        |     |
| AAF46534.1_D._melano | LLSWPEVCA  |     | KLPNPA |     | NQHLKGADGPLRKVG |     |
| AAF46544.1_D._melano | YLAYYEICQ  |     | TLKDDP |     | EWTVVQPN        |     |
| At4g19720_A._thalian | SINYDQIKR  |     | LIVDHK |     | ARPVFD          |     |
| At4g19750_A._thalian | SITYAKIRN  |     | YIIDNG |     | AATFHD          |     |
| EAA67655_G._zeae     | VYLLKDLPR  |     | PG     |     | AVTTYNAD        |     |
| EAA73155_G._zeae     | IWDYKVLPK  |     | PG     |     | ASLVYDRD        |     |
| EAA74986_G._zeae     | VWDYKALPK  |     | PG     |     | AEIKYDEE        |     |
| EAA74223_G._zeae     | VYDYKALPL  |     | EG     |     | AQEYGDRG        |     |
| MGG_05533_M._grisea  | IWIYKDLPR  |     | AG     |     | ATVLYDDV        |     |
| MGG_01247_M._grisea  | VWLYKDLPR  |     | PG     |     | AIVAYDNV        |     |
| MGG_00086_M._grisea  | IWDYKALPR  |     | PG     |     | ATELYDAA        |     |
| MGG_07927_M._grisea  | VYDFKALPL  |     | PG     |     | AEERFDEE        |     |
| Chi18_6_H._jecorina  | VWLYRDLPR  |     | PG     |     | SVVNLNRD        |     |
| Chi18_5_H._jecorina  | VWDYKALPK  |     | AG     |     | ATVQYDDV        |     |
| Chi18_7_H._jecorina  | IFDYKVLPL  |     | PG     |     | SQEFWDEA        |     |
| 04883_N._crassa      | IWDYKVLPK  |     | SG     |     | AKVFLDEK        |     |
| 04554_N._crassa      | VHDYKKLPL  |     | EG     |     | AEERVDYE        |     |
| 11407_B._fuckeliana  | VWDYKDLPR  |     | AG     |     | ATEYYASD        |     |
| 05350_B._fuckeliana  | VHDFKKLPQ  |     | EG     |     | AREFVDEE        |     |
| 11700_S._sclerotioru | IYDYKVLPR  |     | AG     |     | ATEFYLPD        |     |
| 11304_S._sclerotioru | VHDFKKLPQ  |     | EG     |     | AEIIVDEE        |     |
| 08020_S._sclerotioru | VYDYKALPL  |     | AG     |     | ATEVYDKK        |     |
| 01250_A._capsulatum  | VWDYKVLPR  |     | QG     |     | SEEMNDHE        |     |
| 05886_A._capsulatum  | IWDYKVLPR  |     | EG     |     | AKEHMEGSGSKGG   |     |
| 06565_A._capsulatum  | IWDYKSLPK  |     | VG     |     | AVEYIDSLEKGG    |     |
| 05250_C._immitis     | VWDYKALPR  |     | PD     |     | SEEQNDDQ        |     |
| 02795_C._immitis     | VWDYKDMPQ  |     | QG     |     | AQVTELED        |     |
| 03822_C._immitis     | IWDYKTLPR  |     | PG     |     | AKEFMDPMVNGG    |     |
| AN5454_E._nidulans   | VWDYKALPK  |     | PG     |     | AEVVEVEE        |     |
| AN4871_E._nidulans   | VYDYKALPR  |     | PG     |     | ATEQLDTN        |     |
| 00269_P._nodorum     | VYDYKTLPR  |     | AG     |     | ASVTNLDL        |     |
| 04870.1_C._cinereus  | VYDYRTLPL  |     | PLD.T  |     | TFTYNDED        |     |
| 09921.1_C._cinereus  | IYSYKALPL  |     | AG     |     | GQVYENKT        |     |
| 124149_P._chrysospor | VYDYRALPL  |     | PG     |     | SYVLQDDA        |     |
| 134311_P._chrysospor | IYSYSALPL  |     | AG     |     | AQVFENLT        |     |
| 03412_F._neoformans  | MWDYKALPR  |     | PG     |     | AQETNDHR        |     |
| 13635_R._oryzae      | QFDYKCLPK  |     | PG     |     | ATEYHDFQ        |     |
| UM04261_U._maydis    | NWDYKFLPV  |     | KG     |     | AKEMINTK        |     |

|                      |                      |                        |                         |
|----------------------|----------------------|------------------------|-------------------------|
| EAA69503_G._zeae     | TFEYNQLPR.....       | KGC.....               | KEVVDKR.....            |
| EAA70860_G._zeae     | EIDYCDLPD.....       | EWVT.....              | NAEVDQS.....            |
| Chi18_3_H._jecorina  | TFEYSELPR.....       | KGC.....               | KEIVDRR.....            |
| Chi18_2_H._jecorina  | EMDYCDIPD.....       | EWVR.....              | QAVVDEA.....            |
| 03026_N._crassa      | SFEYCQLPR.....       | RGT.....               | KEQVDKR.....            |
| 01594_B._fuckeliana  | TFEYKLLPR.....       | PGT.....               | QEVVDTT.....            |
| 05897_S._sclerotioru | TFEYKLLPR.....       | PGT.....               | QEVVDTA.....            |
| 04742_A._capsulatum  | VFDYRELPL.....       | PGT.....               | EEVHDAV.....            |
| 04750_C._immitis     | VFDYCDLPL.....       | PGS.....               | VEQHDDR.....            |
| 04719_P._nodorum     | TFEYRDLPR.....       | PGA.....               | TEHVDER.....            |
| MGG_08458_M._grisea  | EVDYNDLPT.....       | ADLD.....              | RAMVDPE.....            |
| CHT4_C._albicans     | VVDYNKFGD.....       | TF.....                | DYEDFDP.....            |
| 01119_L._elongisporu | ILGNAKDQN.....       | IL.....                | EHG.FDVK.....           |
| XP_454053_K._lactis  | IWLYNQLPI.....       | DG.....                | SKEQFDSN.....           |
| CTS2_S._cerevisiae   | IWPYKNLPR.....       | IG.....                | TIEQYDPK.....           |
| 246746_L._bicolor    | SYDYRALAL.....       | PG.....                | SFTYRDQD.....           |
| 03209_N._crassa      | TWVYRDLPR.....       | PG.....                | AKEEYDNL.....           |
| 14474_P._nodorum     | TLDYKFLPL.....       | NG.....                | SKVYQDKE.....           |
| CE06282_C._elegans   | TYLSRLAVK.....       | Q.EGFQVE.....          | SYSYDPA.....            |
| CE03547_C._elegans   | TSMSRKLVS.....       | E.EGYDFS.....          | NPTYNPE.....            |
| CE03542_C._elegans   | PYISRLSVK.....       | Q.KGIELF.....          | PYSWDNA.....            |
| CE15845_B_C._elegans | T.MSRSIK.....        | K.KGWRLT.....          | SADWDET.....            |
| CE02997_C._elegans   | .LPRRQLR.....        | QYNWNLT.....           | DIKFHNL.....            |
| CE36953_C._elegans   | DVQWRDLH.....        | EKFDTT.....            | KTKFHS.....             |
| YP_432439_H._chejue  | LWHAKNLAE.....       | GVAG.SYIADYGLDPA.....  | NDPTDVLTSYSRHYDAT.....  |
| YP_529449.1_S._degra | MWHAKNLEN.....       | NILG.DYLTAYGLDPI.....  | NNPDHQLSGNYQRYDDV.....  |
| YP_077582_B._licheni | MWHAKNLEK.....       | GIAG.SYLERYGLS.....    | KADLTGVYKRHYDAG.....    |
| ChiI_S._coelicolor   | MWHAKNLEK.....       | GIVG.DYVTDYGF.....     | ADTKLTGTYARKYDST.....   |
| NP_902986_C._violace | MWHAKNLEK.....       | GLAG.SYLAAYGIDP.....   | TLPINQLTGSYQRNYNGA..... |
| ZP_01159608_Photobac | MWHAKNLEQ.....       | GIFG.SYTAAYGLDPV.....  | NDPQDKLVGSYTRNYDDV..... |
| ZP_01234708_V._angus | MWHAKNLEQ.....       | GIFG.SYTAAYGLDPV.....  | NDPQDKLVGSYTRNYDDV..... |
| NP_233087_V._cholera | MWHAKNLEK.....       | GIWG.SYAAAYKLDPT.....  | TTP...LIGTYVRNYDSV..... |
| NP_230718_V._cholera | MWHAAMNLMHAEKLGIDGMP | SYGPAWMDP.....         | NNPKHLIEGKYERVWSQE..... |
| AAO07185_V._vulnific | MWHAKNLEK.....       | GIFG.SYASAYKLDPV.....  | NDPQDKLVGSYVRNYDSV..... |
| ZP_01354150_C._phyto | KENYISK.N.....       | G.....                 | YTRYWDDI.....           |
| ZP_01246933_F._johns | ATTYTEA.N.....       | G.....                 | WKYFWDDK.....           |
| YP_012734_L._monocyt | NENPIKTGD.....       | GGRAGGVWAYRSIDALKAKTPT | LKEYFDDT.....           |
| YP_529337.1_A_S._deg | IATFNDIQ.....        | LIEGN.....             | YGYTRHFDDQ.....         |
| ChiA_A_P._kodakarae  | VMDYWDVAE.....       | KN.....                | QSSEYEYHWDPI.....       |
| AAG19274_Halobacteri | IKEYWDITQ.....       | N.LA.....              | PSSDYETFWDDT.....       |
| AAG19275_Halobacteri | AFDYGDIAA.....       | N.YE.....              | GADAWTKQRNEQ.....       |
| CE03543_C._elegans   | PYMDRSSAD.....       | Y.K.....               | MASWDNL.....            |
| CE34961_C._elegans   | SYMSRWTVD.....       | H.EGWELT.....          | PALWDDV.....            |
| CE20043_C._elegans   | AYMSRWSAQ.....       | H.EELDLS.....          | PADWDEE.....            |
| CE15845_A_C._elegans | PYISRWSAE.....       | KTHGLSLG.....          | STNWDTE.....            |
| CE32863_A_C._elegans | PYISRWSAE.....       | KTHGLSLG.....          | STNWDTE.....            |
| CE03544_C._elegans   | SQLSRYTVE.....       | H.EDMELS.....          | PESWDNA.....            |
| CE08731_C._elegans   | A.....               |                        |                         |
| CE28638_C._elegans   | AYMSRKTVA.....       | K.EKIRLT.....          | LPSWDTL.....            |
| CE32863_B_C._elegans | T.MSRSIK.....        | K.KGWRLT.....          | SADWDET.....            |
| CE01673_C._elegans   | .....                |                        | TIEQTEQ.....            |
| CE02993_C._elegans   | .VRWRELL.....        | QQKWNLE.....           | DIKFHNL.....            |
| CE02996_C._elegans   | .VRWRHLR.....        | QRNWNLT.....           | DIKFHNL.....            |
| CE02995_C._elegans   | .VRWRELL.....        | QQKWDM.....            | NIKFHNL.....            |
| CE02992_C._elegans   | .IGWRKFIF.....       | DRRNTIP.....           | QWHD.....               |
| CE02999_C._elegans   | .YGWKQFAR.....       | MSHGFQDN.....          | DFEWNEE.....            |
| CE02998_C._elegans   | FVAWKNLA.....        | GRGWKDS.....           | EALWHEE.....            |
| CE09229_C._elegans   | YVGWRNLA.....        | KEGWKNG.....           | SASWHEK.....            |
| CE12928_C._elegans   | YVGWRNLE.....        | KEGWKNG.....           | SATWHKK.....            |
| CE23907_C._elegans   | RYMNRSIVK.....       | Q.QGFQLE.....          | RYSYDEL.....            |
| CE32917_C._elegans   | SFMSRKSVL.....       | E.KGYKLN.....          | SYSYDEL.....            |
| CE34579_C._elegans   | VYMPRRSAL.....       | Q.KGYNLS.....          | SYNYDDL.....            |



|                      |                              |                                                  |                                |
|----------------------|------------------------------|--------------------------------------------------|--------------------------------|
| CE25073_C._elegans   | TSMSRKL <sup>V</sup> Q.....  | E.EGYDFS.....                                    | NPTYNPE.....                   |
| CE03548_C._elegans   | ANMSRKL <sup>V</sup> Q.....  | Q.EGYDLS.....                                    | HP <sup>T</sup> FNSE.....      |
| NP_469498_L._innocua | NENPIKT <sup>G</sup> ED..... | GGRAGGVWAYRSIDALKAKTPTLKE <sup>Y</sup> WDDT..... |                                |
| CE08730_C._elegans   | VYMSRWTA <sup>E</sup> .....  | S.DGIELS.....                                    | NPSWDDT.....                   |
| Q8U1H4_P._furiosus   |                              |                                                  |                                |
| CE12474_C._elegans   | TQISRWTAE.....               | H.EGLELS.....                                    | PSSWDNL.....                   |
| CE02990_C._elegans   | .LRWREL <sup>P</sup> .....   | HHKWNLE.....                                     | NIK <sup>F</sup> HNL.....      |
| CE40270_C._elegans   | SHMSRMIV <sup>Q</sup> .....  | Q.KGFVLT.....                                    | PYSFDNA.....                   |
| CE40296_C._elegans   | .VRWRELL.....                | QQKWDMS.....                                     | NIK <sup>F</sup> HNL.....      |
| ChiB_S._marcescens   | IASYRQLE <sup>Q</sup> .....  | MLQGN.....                                       | YGYQRLW <sup>N</sup> DK.....   |
| O10363_O._pseudotsug | VVDYRQINN.....               |                                                  | ELSKYIYRFDA <sup>A</sup> ..... |
| AAP29899_C._fumifera | VVDYRQIEN.....               |                                                  | ELNKYIYKFDSV.....              |
| AAV73807_B._mori_NPV | VVDYRQIQK.....               |                                                  | DLNNYVYTFDSA.....              |
| AAL56186_H._zea_SNPV | VVDYRQIAK.....               |                                                  | NISRYEYAFDDV.....              |
| AAF33549_S._exigua_N | VVDYRQIVH.....               |                                                  | NMSQYDYVYDEV.....              |
| AAZ38189_A._segetum  | VVDYRQIVH.....               |                                                  | NITQYNYDYDEV.....              |
| AAS82706_A._segetum  | VVDYKDLIQ.....               |                                                  | RYTDTYY..DSV.....              |
| ZP_01159013_Photobac | VIDYKGIKS.....               | YMLG.....                                        | ANSQGINGFEYGYDEQ.....          |
| ZP_01161077_Photobac | VVDYRDIVD.....               |                                                  | NRSTNGWESHYDAK.....            |
| ZP_01159325_Photobac | YFMYWDLKR.....               | NYT.....                                         | KAQGYISGYDEK.....              |
| ZP_01160869_Photobac | YFNYSDIVK.....               | YLIN.....                                        | N.KKMGYQYYYDEK.....            |
| ZP_01233025_V._angus | VIDYKGIKS.....               | YMLG.....                                        | ANSQGINGFEYGYDEQ.....          |
| ZP_01236284_V._angus | VVDYRDIVD.....               |                                                  | NRSTNGWESHYDAQ.....            |
| ZP_01235109_V._angus | YFMYWDLKR.....               | NYT.....                                         | KAQGYISGYDEK.....              |
| ZP_01235465_V._angus | YFNYSDIVK.....               | YLIN.....                                        | N.KKMGYQYYYDEK.....            |
| AAO08114_V._vulnific | VIDYKGIKS.....               | FMLG.....                                        | PNSTGINGFEYGYDDQ.....          |
| AAO07498_V._vulnific | YFMFWDLVK.....               | NYG.....                                         | EKQGYQYNYDEQ.....              |
| NP_232428_V._cholera | VIDYKGVKN.....               | FMLG.....                                        | ANKTGVNGFEYGYDEQ.....          |
| YP_432951_H._chejuen | VLEGYDMYQ.....               | SFLDP.....                                       | SLRPYNGYKLYTDKA.....           |
| YP_529337.1_B_S._deg | VQDYRDLYD.....               | NYIG.....                                        | TNGTGINGFSAHYDEI.....          |
| YP_435912_H._chejuen | VLDYRAIEQ.....               | KFLGG.....                                       | ANGQGIDGYKYFYDEK.....          |
| ZP_01137509_A._cellu | IAMYKELTG.....               | FVD.....                                         | N..PAYTFWDPV.....              |
| ChiE_S._coelicolor   | VRGYSNLIG.....               | SYPS.....                                        | M..TVHHDEESV.....              |
| ChiC_S._coelicolor   | IEDYKVL.....                 |                                                  | K..NSCPATGTI.....              |
| ChiD_S._coelicolor   | IEDYKVL.....                 |                                                  | K..TSCPATGTV.....              |
| NP_903910_C._violace | IEDYRIL.....                 | VK.....                                          | R..SAKQFNSPV.....              |
| YP_529072.1_S._degra | IEDYKVL.....                 |                                                  | K..NTCPATGTI.....              |
| ZP_01431615_S._tropi | FDDYKVL.....                 |                                                  | K..NTCPVTGTV.....              |
| ZP_01136287_A._cellu | WAQLEALG.....                |                                                  | YAPYRDPI.....                  |
| 01315.1_C._cinereus  | TFNFWGLIE.....               | NG.....                                          | FLNK.....                      |
| 03252.1_C._cinereus  | VYTYWGLFE.....               | GG.....                                          | FLNA.....                      |
| 05285.1_C._cinereus  | LFTFNGLIA.....               | GG.....                                          | LLGT.....                      |
| 05291.1_C._cinereus  | LFNFAGLVD.....               | AG.....                                          | YLN <sup>P</sup> .....         |
| 01586.1_C._cinereus  | QIPFKTIVS.....               | SGA.....                                         | LVKK.....                      |
| 128098_P._chrysospor | VWNFAGMIS.....               | GG.....                                          | YLDQ.....                      |
| 39872_P._chrysospori | NWDYWGLVS.....               | EG.....                                          | WVWP.....                      |
| 138098_P._chrysospor | IYNYRGLVE.....               | KG.....                                          | YLDA.....                      |
| 129436_P._chrysospor | EVQFRDLVQ.....               | QGV.....                                         | LHTADTL <sup>S</sup> FAGH..... |
| EAA71245_G._zeae     | TYPFWSLIK.....               | EAK.....                                         | FLDA.....                      |
| MGG_04732_M._grisea  | TFTFWSMVT.....               | EGQ.....                                         | FLDE.....                      |
| UM06190_U._maydis    | QINFSTLVS.....               | QGA.....                                         | LKLG.....                      |
| 04245_F._neoformans  | QVMWYGLLN.....               | QGA.....                                         | LTLS.....                      |
| 16170_R._oryzae      | EYQWRSIVA.....               | NG.....                                          | ILEN.....                      |
| 01334_R._oryzae      | EYQWRSIVA.....               | NG.....                                          | ILEN.....                      |
| 13934_R._oryzae      | EIQWRTIEQ.....               | RG.....                                          | IDRN.....                      |
| 07611_R._oryzae      | VWRWAYLRS.....               | QGI.....                                         | LTSP.....                      |
| 10252_R._oryzae      | IWKWTNLRK.....               | EGI.....                                         | LKDDF.....                     |
| 14659_R._oryzae      | TWQYSHLLS.....               | QQV.....                                         | LKTA.....                      |
| 231399_L._bicolor    | ILDFKRITQ.....               | EG.....                                          | YLDK.....                      |
| 180319_L._bicolor    | VFSFEG <sup>L</sup> VT.....  | AG.....                                          | YLTS.....                      |
| 191848_L._bicolor    | VFNFE <sup>G</sup> MVS.....  | AG.....                                          | YLTS.....                      |
| 317003_L._bicolor    | QIPFSAIVK.....               | SGA.....                                         | LVKK.....                      |

|                      |                                                     |
|----------------------|-----------------------------------------------------|
| 246840_L._bicolor    | EYTYWGLME.....EG.....FLNT.....                      |
| 144643_L._bicolor    | QVQFRDLLS.....QGA.....LVRX.....                     |
| 310136_L._bicolor    | VFNFNGMIA.....HG.....FLNS.....                      |
| 629882_M._xanthus    | SFTYSKILQ.....LSA.....                              |
| 630509_A_M._xanthus  | .....                                               |
| YP_592598_Acidobacte | .WNYGTIYK.....QR.....                               |
| YP_446903_S._ruber   | LANHVAT.....Q.....P.....GFERQWDAV.....              |
| ZP_00739282_B._thuri | VYDYGDLTA.....NYVN.....K.NGFVRYWNDT.....            |
| ZP_01245639_F._johns | YLDPNTMMV.....TPSA.....ASAGWVRYFDNT.....            |
| NP_976824_B._cereus  | VYDYGDLLAA.....NYVN.....K.NGFVRGWNDI.....           |
| YP_077581_B._licheni | VFD FSDLER.....NYVN.....Q.NGYKRYWNDQ.....           |
| 631138_M._xanthus    | VFD FDKDIKA.....NYER.....PGSGYTKFFHPE.....          |
| ZP_01247029_F._johns | GISYANIVA.....QY.....                               |
| ZP_01234549_V._angus | APTYGVLVK.....DD.....                               |
| ZP_01160697_Photobac | APTYGALVK.....EN.....                               |
| ZP_01158584_Photobac | GPTYTKMVH.....DQ.....                               |
| AN0549_E._nidulans   | ILLNSEITE.....VMADRK.....VKST.LN.K.....             |
| AN8481_E._nidulans   | ILLNSEIVD.....IMNEQQ.....VKPS.LD.K.....             |
| AN9390_E._nidulans   | SLMFSEIQE.....IIDAGG.....AKVT.ND.E.....             |
| AN0517_E._nidulans   | ILTYAEISS.....RNNSLD.....VHTF.YD.P.....             |
| AN0541_E._nidulans   | ILTFKEIMA.....RQKRLN.....QKVIKYD.E.....             |
| AN5077_E._nidulans   | ILSYMEIME.....LLENSG.....ATAH.LD.E.....             |
| AN0509_E._nidulans   | YLANAEINK.....ILSGSPSGLNTR.....DTASSRVTAH.YL.D..... |
| AN7613_E._nidulans   | IIAIAEIEA.....LMIEG.....DINES.FH.D.....             |
| 07035_N._crassa      | VLLHAEIQD.....EISARK.....LTPT.LH.R.....             |
| 07484_N._crassa      | YISNAEIND.....IIVN..N.....ASRVNQ.N.FI.D.....        |
| 05317_N._crassa      | YIADAEIAE.....IMAGTGS.....KRSGRVTAS.FV.D.....       |
| EAA74768_G._zeae     | ILLNSEIEG.....VIKDWD.....LTPK.LY.K.....             |
| EAA78168_G._zeae     | ILFNSEISD.....LIREKK.....LRPK.LY.K.....             |
| EAA75711_G._zeae     | VMSLGEIKN.....LIKNGK.....VKSIIYLE.....              |
| EAA68447_G._zeae     | YIADAEIAE.....ILKDKS.....RVVKH.FV.D.....            |
| EAA77156_G._zeae     | YLSDAEIRL.....IAYDAKK.....G.KAGVTAKTWY.D.....       |
| 12510_S._sclerotioru | ILLNSEIDD.....LVKANG.....VKPK.LY.E.....             |
| 00773_S._sclerotioru | ILLSSEIEQ.....IMSDND.....LTPV.FY.K.....             |
| 05454_S._sclerotioru | TLSYAEIVD.....IIDRNK.....LSPY.HD.K.....             |
| 00677_S._sclerotioru | ILSMREIEV.....LVLREG.....LGVSWVG.GEAAGQ.....        |
| 02128_S._sclerotioru | ..ANAEIDS.....IISGNATVLGT.....DGSSVRVTGTPFV.YL..... |
| MGG_04534_M._grisea  | VLSVAEINK.....IINKGG.....KVT.YD.A.....              |
| MGG_01336_M._grisea  | VLSLNEINR.....IAAARG.....LTPRYDS.....               |
| 14527_P._nodorum     | ILD LQEIKD.....IVSKNN.....LNPT.WD.K.....            |
| 15411_P._nodorum     | VLSNLEIRR.....LIKDEG.....ITPYFNT.....               |
| 02214_P._nodorum     | ILSSCEIRR.....LISEKH.....LSWKVIQ.G.....             |
| 04761_C._immitis     | ILTYREIMA.....MIKTDK.....LKPF.HD.K.....             |
| 04323_A._capsulatum  | TLSNYEINR.....VLKEQS.....PEVI.YN.K.....             |
| 00533_B._fuckeliana  | ILSMREIEV.....LVLREG.....LRATWAG..ASAAE.....        |
| Chi18_1_H._jecorina  | YISNYEINR.....IVAGNP.....SAEVHWD.....               |
| Chi18_8_H._jecorina  | YISNAEITE.....IINKHG.....NYSIVNS.YI.D.....          |
| Chi18_9_H._jecorina  | YLANAEINE.....IISKSK.....GH..PKT.WY.D.....          |
| Chi18_10_H._jecorina | YISNAEILD.....IMEDRK.....SYPVQAWY.D.....            |
| 02650_A._capsulatum  | AFSWNEPAP.....G.....                                |
| AN0221_E._nidulans   | AFSWNDRVP.....Q.....                                |
| 06020_N._crassa      | AFSWHDDVP.....K.....                                |
| EAA76014_G._zeae     | GFSWHDEV P.....K.....                               |
| Chi18_4_H._jecorina  | AFSWHDEV P.....V.....                               |
| 09277_P._nodorum     | AFSWHDQVP.....S.....                                |
| 05838_A._capsulatum  | SVTFEVAEI.....S.PPRAP.....VGVSPNATCGPLNGFRC.....    |
| EAA69039_G._zeae     | SMTFEAANF.....A.AAPT.N.....LTTSTDATCGAGTFFKC.....   |
| MGG_06594_M._grisea  | AFTFEAANF.....A.TTPT.N.....LTLTTDASCGANTFNKC.....   |
| Chi18_11_H._jecorina | AITFEASTY.....A.G.....                              |
| 02644_A_P._nodorum   | AWTFEP SHM.....KPV DASA.....LTVSYDGT CGPDKGTRC..... |
| AN9447_E._nidulans   | AMTFEPQNM.....A.AQPSD.....LKVSTDMTCGLAKGTRC.....    |

|                      | 850   | 860   | 870   | 880          | 890   | 900   |
|----------------------|-------|-------|-------|--------------|-------|-------|
| NP_979924_B._cereus  | ..... | ..... | ..... | AQAPHFNYFD   | ..... | ..... |
| YP_077302_B._licheni | ..... | ..... | ..... | AQAPNFRYTD   | ..... | ..... |
| YP_091539_B._licheni | ..... | ..... | ..... | SESPFFRYTD   | ..... | ..... |
| YP_079121_B._licheni | ..... | ..... | ..... | SESPFFRYTD   | ..... | ..... |
| YP_074366_S._thermop | ..... | ..... | ..... | AQAPFYRYVD   | ..... | ..... |
| YP_075811_S._thermop | ..... | ..... | ..... | AQSPFYRYWD   | ..... | ..... |
| YP_075619_S._thermop | ..... | ..... | ..... | AQVPWFRYV    | ..... | ..... |
| ZP_01354047_C._phyto | ..... | ..... | ..... | AQTPFFTYTR   | ..... | ..... |
| ZP_01354926_C._phyto | ..... | ..... | ..... | TGQYYAEYEK   | ..... | ..... |
| NP_902406_C._violace | ..... | ..... | ..... | THSLTFNYGA   | ..... | ..... |
| ZP_01136704_A._cellu | ..... | ..... | ..... | DGEPYVTTYD   | ..... | ..... |
| ZP_00526542_S._usita | ..... | ..... | ..... | EHAPWFFYFR   | ..... | ..... |
| AAF46212.1_D._melano | ..... | ..... | ..... | AESCSPYLSAL  | ..... | ..... |
| AAF46534.1_D._melano | ..... | ..... | ..... | DPTKRFGSYAYS | ..... | ..... |
| AAF46544.1_D._melano | ..... | ..... | ..... | ANVMGPYAYRR  | ..... | ..... |
| At4g19720_A._thalian | ..... | ..... | ..... | STVVGDYCFAG  | ..... | ..... |
| At4g19750_A._thalian | ..... | ..... | ..... | PAVIGFYCYVG  | ..... | ..... |
| EAA67655_G._zeae     | ..... | ..... | ..... | LMASYTYD     | ..... | ..... |
| EAA73155_G._zeae     | ..... | ..... | ..... | AQASYSYD     | ..... | ..... |
| EAA74986_G._zeae     | ..... | ..... | ..... | AQAYYSYD     | ..... | ..... |
| EAA74223_G._zeae     | ..... | ..... | ..... | CCASYCYN     | ..... | ..... |
| MGG_05533_M._grisea  | ..... | ..... | ..... | AKASYTMD     | ..... | ..... |
| MGG_01247_M._grisea  | ..... | ..... | ..... | AKASYSYD     | ..... | ..... |
| MGG_00086_M._grisea  | ..... | ..... | ..... | TGATWSYD     | ..... | ..... |
| MGG_07927_M._grisea  | ..... | ..... | ..... | AGATYSYD     | ..... | ..... |
| Chi18_6_H._jecorina  | ..... | ..... | ..... | IIAAYSYD     | ..... | ..... |
| Chi18_5_H._jecorina  | ..... | ..... | ..... | AKASYSYD     | ..... | ..... |
| Chi18_7_H._jecorina  | ..... | ..... | ..... | IGASYCYN     | ..... | ..... |
| 04883_N._crassa      | ..... | ..... | ..... | VGASWSYD     | ..... | ..... |
| 04554_N._crassa      | ..... | ..... | ..... | SGATYCYH     | ..... | ..... |
| 11407_B._fuckeliana  | ..... | ..... | ..... | VVGTYSYD     | ..... | ..... |
| 05350_B._fuckeliana  | ..... | ..... | ..... | TCASYSYN     | ..... | ..... |
| 11700_S._sclerotioru | ..... | ..... | ..... | VVATYSYD     | ..... | ..... |
| 11304_S._sclerotioru | ..... | ..... | ..... | TCASYSYN     | ..... | ..... |
| 08020_S._sclerotioru | ..... | ..... | ..... | IGASYSWD     | ..... | ..... |
| 01250_A._capsulatum  | ..... | ..... | ..... | LFASWSYD     | ..... | ..... |
| 05886_A._capsulatum  | ..... | ..... | ..... | CGASWSYD     | ..... | ..... |
| 06565_A._capsulatum  | ..... | ..... | ..... | CGASWSYD     | ..... | ..... |
| 05250_C._immitis     | ..... | ..... | ..... | LLASWSYS     | ..... | ..... |
| 02795_C._immitis     | ..... | ..... | ..... | IAASYSYD     | ..... | ..... |
| 03822_C._immitis     | ..... | ..... | ..... | AGASWSYD     | ..... | ..... |
| AN5454_E._nidulans   | ..... | ..... | ..... | IAASFSYD     | ..... | ..... |
| AN4871_E._nidulans   | ..... | ..... | ..... | IGASWSYD     | ..... | ..... |
| 00269_P._nodorum     | ..... | ..... | ..... | LGASWSYD     | ..... | ..... |
| 04870.1_C._cinereus  | ..... | ..... | ..... | LGASWTTYD    | ..... | ..... |
| 09921.1_C._cinereus  | ..... | ..... | ..... | DMTSYSYD     | ..... | ..... |
| 124149_P._chrysospor | ..... | ..... | ..... | AVASWTYN     | ..... | ..... |
| 134311_P._chrysospor | ..... | ..... | ..... | DVTSYSYD     | ..... | ..... |
| 03412_F._neoformans  | ..... | ..... | ..... | LGASYSYD     | ..... | ..... |
| 13635_R._oryzae      | ..... | ..... | ..... | RLASWSYD     | ..... | ..... |
| UM04261_U._maydis    | ..... | ..... | ..... | IAASWSYD     | ..... | ..... |
| EAA69503_G._zeae     | ..... | ..... | ..... | HVAAQCM      | ..... | ..... |
| EAA70860_G._zeae     | ..... | ..... | ..... | VAAASFVD     | ..... | ..... |
| Chi18_3_H._jecorina  | ..... | ..... | ..... | YIAAQCV      | ..... | ..... |
| Chi18_2_H._jecorina  | ..... | ..... | ..... | AVAAWYVD     | ..... | ..... |
| 03026_N._crassa      | ..... | ..... | ..... | AVAAQCV      | ..... | ..... |
| 01594_B._fuckeliana  | ..... | ..... | ..... | TISASCY      | ..... | ..... |
| 05897_S._sclerotioru | ..... | ..... | ..... | TVSASCY      | ..... | ..... |
| 04742_A._capsulatum  | ..... | ..... | ..... | FCAAYCVD     | FGGGS | ..... |
| 04750_C._immitis     | ..... | ..... | ..... | LCAAF        | CV    | ..... |

|                      |                     |
|----------------------|---------------------|
| 04719_P._nodorum     | .....VGAAYCM.....   |
| MGG_08458_M._grisea  | .....LCAAWYLCE..... |
| CHT4_C._albicans     | .....KVGALKYD.....  |
| 01119_L._elongisporu | .....KVAAFAYN.....  |
| XP_454053_K._lactis  | .....AVSAYCFD.....  |
| CTS2_S._cerevisiae   | .....YVSAYCFD.....  |
| 246746_L._bicolor    | .....AIASWSYD.....  |
| 03209_N._crassa      | .....AKATYSYD.....  |
| 14474_P._nodorum     | .....TLSSWSWD.....  |
| CE06282_C._elegans   | .....PRAAFSYN.....  |
| CE03547_C._elegans   | .....IRAAFKYN.....  |
| CE03542_C._elegans   | .....TKSSYIWK.....  |
| CE15845_B_C._elegans | .....TKTSYIWN.....  |
| CE02997_C._elegans   | .....TKTSYIWI.....  |
| CE36953_C._elegans   | .....SKTPFIWL.....  |
| YP_432439_H._chejuen | .....AVAPWLWN.....  |
| YP_529449.1_S._degra | .....LVAPWLWN.....  |
| YP_077582_B._licheni | .....LAAPWLWN.....  |
| ChiI_S._coelicolor   | .....LVAPWLWN.....  |
| NP_902986_C._violace | .....LAAPWLWN.....  |
| ZP_01159608_Photobac | .....AVAPWLWN.....  |
| ZP_01234708_V._angus | .....AVAPWLWN.....  |
| NP_233087_V._cholera | .....AVAPWLWN.....  |
| NP_230718_V._cholera | .....LQTAWLWN.....  |
| AAO07185_V._vulnific | .....AVAPWLWN.....  |
| ZP_01354150_C._phyto | .....SKAACLHN.....  |
| ZP_01246933_F._johns | .....AKAPYWYN.....  |
| YP_012734_L._monocyt | .....AKAPYLYS.....  |
| YP_529337.1_A_S._deg | .....TKAPWLYH.....  |
| ChiA_A_P._kodakarae  | .....AQVAWLYS.....  |
| AAG19274_Halobacteri | .....AKVPWLYS.....  |
| AAG19275_Halobacteri | .....GGVPYLWN.....  |
| CE03543_C._elegans   | .....TSTPYIWK.....  |
| CE34961_C._elegans   | .....TKTPYVWN.....  |
| CE20043_C._elegans   | .....TRSSYTWN.....  |
| CE15845_A_C._elegans | .....TKTSFLWD.....  |
| CE32863_A_C._elegans | .....TKTSFLWD.....  |
| CE03544_C._elegans   | .....TQTPYVLD.....  |
| CE08731_C._elegans   | .....TETSSMYN.....  |
| CE28638_C._elegans   | .....TKTSYIWN.....  |
| CE32863_B_C._elegans | .....IDMQYVWN.....  |
| CE01673_C._elegans   | .....TKTSYIWI.....  |
| CE02993_C._elegans   | .....TKTSYIWI.....  |
| CE02996_C._elegans   | .....TKTSYIWI.....  |
| CE02995_C._elegans   | .....TKTSYMWI.....  |
| CE02992_C._elegans   | .....SKSSYAWD.....  |
| CE02999_C._elegans   | .....TRTPYIWK.....  |
| CE02998_C._elegans   | .....TQIPYIWN.....  |
| CE09229_C._elegans   | .....TKTPYIMN.....  |
| CE12928_C._elegans   | .....TKTPYIMN.....  |
| CE23907_C._elegans   | .....TKGSFIYN.....  |
| CE32917_C._elegans   | .....SRSAFIYN.....  |
| CE34579_C._elegans   | .....SETAFIYN.....  |
| CE25073_C._elegans   | .....IRAAFKYN.....  |
| CE03548_C._elegans   | .....IRAAFKYN.....  |
| NP_469498_L._innocua | .....AKAPYLYS.....  |
| CE08730_C._elegans   | .....TKTLYIWK.....  |
| Q8U1H4_P._furiosus   | .....TMTPYILD.....  |
| CE12474_C._elegans   | .....TKTSYIWI.....  |
| CE02990_C._elegans   | .....TRNAFIYN.....  |
| CE40270_C._elegans   | .....TKTSYMWI.....  |
| CE40296_C._elegans   | .....TKTSYMWI.....  |



|                      |                      |
|----------------------|----------------------|
| ChiB_S._marcescens   | TKTPYLYH             |
| O10363_O._pseudotsug | AKAAYVFN             |
| AAP29899_C._fumifera | AKAAYVFN             |
| AAV73807_B._mori_NPV | AQASYVFD             |
| AAL56186_H._zea_SNPV | AKAAYVFD             |
| AAF33549_S._exigua_N | VKGAYVYN             |
| AAZ38189_A._segetum  | AKGAYVYD             |
| AAS82706_A._segetum  | AQAAYAFa             |
| ZP_01159013_Photobac | AEAPYVWN             |
| ZP_01161077_Photobac | AEASYQWN             |
| ZP_01159325_Photobac | AEAPYLWN             |
| ZP_01160869_Photobac | AEAAVLFS             |
| ZP_01233025_V._angus | AEAPYVWN             |
| ZP_01236284_V._angus | AEASYQWN             |
| ZP_01235109_V._angus | AEAPYLWN             |
| ZP_01235465_V._angus | AEAAVLFS             |
| AAO08114_V._vulnific | AEAPYVWN             |
| AAO07498_V._vulnific | SQAPYLWN             |
| NP_232428_V._cholera | AEAPWVWN             |
| YP_432951_H._chejuen | SNADYLVQ             |
| YP_529337.1_B_S._deg | AEAAYLWN             |
| YP_435912_H._chejuen | AQAPFLWN             |
| ZP_01137509_A._cellu | TQ_AAWF              |
| ChiE_S._coelicolor   | ST_FGYT              |
| ChiC_S._coelicolor   | AG_TAYA              |
| ChiD_S._coelicolor   | GG_TAYA              |
| NP_903910_C._violace | AK_QLWT              |
| YP_529072.1_S._degra | AG_TAYA              |
| ZP_01431615_S._tropi | GG_TAYA              |
| ZP_01136287_A._cellu | TGGYWLYD             |
| 01315.1_C._cinereus  | DGSP_TQGIHRYDTCsq    |
| 03252.1_C._cinereus  | DGSV_AEGIVSRYDDCSq   |
| 05285.1_C._cinereus  | DGEA_APGVVYGFNDCTE   |
| 05291.1_C._cinereus  | DGTA_AEGMVYLCDDCSq   |
| 01586.1_C._cinereus  | SDGTYGQGGGFTMGWDNCSN |
| 128098_P._chrysospor | NGTA_VAGLGYRFDTCsq   |
| 39872_P._chrysospori | NGTA_RPGIESRFDDCSq   |
| 138098_P._chrysospor | NGTA_VSGMGFRYDTCSE   |
| 129436_P._chrysospor | TIANVFTGLRGFERRDACSs |
| EAA71245_G._zeae     | SGNP_APGIAYTWDKCSK   |
| MGG_04732_M._grisea  | SGKP_RAGIAYGYDDCSq   |
| UM06190_U._maydis    | ADGLFDGAGGFTRYWDCCSD |
| 04245_F._neoformans  | DGQYVGAGGFTRYWDCCSS  |
| 16170_R._oryzae      | KNGWTTYWDEQSQ        |
| 01334_R._oryzae      | KNGWTTYWDEQSQ        |
| 13934_R._oryzae      | ASGWATFWDSTSQ        |
| 07611_R._oryzae      | TTA_ASPWIRNFDDHTQ    |
| 10252_R._oryzae      | ITP_GEGWVRHWDDVTQ    |
| 14659_R._oryzae      | QKA_RKPWVRTWDKATS    |
| 231399_L._bicolor    | NGAP_RLGIAYRYDDCSq   |
| 180319_L._bicolor    | TGSP_AFNMLSRFDNCSq   |
| 191848_L._bicolor    | NGTA_APNMVYRFDDCSK   |
| 317003_L._bicolor    | SDGTYGEGGGFTMGWDNCSd |
| 246840_L._bicolor    | DGTT_KTGIAYRYDNCSq   |
| 144643_L._bicolor    | STSPTFAASGGFERNDCCSC |
| 310136_L._bicolor    | NGTA_ANGIDYAFDNCSq   |
| 629882_M._xanthus    | TGVYHWDEAAK          |
| 630509_A_M._xanthus  |                      |
| YP_592598_Acidobacte | VN_AKGWKRYWDGSAQ     |
| YP_446903_S._ruber   | ARASTLWA             |
| ZP_00739282_B._thuri | AKVPYLYN             |
| ZP_01245639_F._johns | TKVPYLYN             |

|                      |                                                            |
|----------------------|------------------------------------------------------------|
| NP_976824_B._cereus  | .....AKVPYLYN.....                                         |
| YP_077581_B._licheni | .....AKVPFLYN.....                                         |
| 631138_M._xanthus    | .....AKEAYVYN.....                                         |
| ZP_01247029_F._johns | .....PGAENLDQVG.....                                       |
| ZP_01234549_V._angus | .....KHYACRDTVT.....                                       |
| ZP_01160697_Photobac | .....KHYACRDTVT.....                                       |
| ZP_01158584_Photobac | .....HQMCRDTIEG.....                                       |
| AN0549_E._nidulans   | .....EAAVKIVKFDI.....                                      |
| AN8481_E._nidulans   | .....EAAVKILKFDI.....                                      |
| AN9390_E._nidulans   | .....KAGVQMTWDT.....                                       |
| AN0517_E._nidulans   | .....ETTVKYNVYEG.....                                      |
| AN0541_E._nidulans   | .....DSGVKYMVYDE.....                                      |
| AN5077_E._nidulans   | .....EAAVQYLVYAD.....                                      |
| AN0509_E._nidulans   | .....EDSDSNILVYD.....                                      |
| AN7613_E._nidulans   | .....PASDSNILVYN.....                                      |
| 07035_N._crassa      | .....EAAVKSWSWG.....                                       |
| 07484_N._crassa      | .....SSSNSRIVVYD.....                                      |
| 05317_N._crassa      | .....ASSNSDILVYD.....                                      |
| EAA74768_G._zeae     | .....EEAVKLITWG.....                                       |
| EAA78168_G._zeae     | .....DAAIKTIQWNN.....                                      |
| EAA75711_G._zeae     | .....EAMMKQISWD.....                                       |
| EAA68447_G._zeae     | .....STSHSDILVYD.....                                      |
| EAA77156_G._zeae     | .....KASDSDIMTYGTQKG.....                                  |
| 12510_S._sclerotioru | .....KDASKVASWG.....                                       |
| 00773_S._sclerotioru | .....DAAVKAITWDN.....                                      |
| 05454_S._sclerotioru | .....EAAVKWITWGG.....                                      |
| 00677_S._sclerotioru | .....EGDEAVKQIVFGGG.....                                   |
| 02128_S._sclerotioru | .....DDSYSNIVVYN.....                                      |
| MGG_04534_M._grisea  | .....AAAVKIVTWDT.....                                      |
| MGG_01336_M._grisea  | .....KAMVKQLSWD.....                                       |
| 14527_P._nodorum     | .....VAGVKWITWDS.....                                      |
| 15411_P._nodorum     | .....TAMVKYFKYAG.....                                      |
| 02214_P._nodorum     | .....GAEVNEVTWD.....                                       |
| 04761_C._immitis     | .....TAGVKYITYSG.....                                      |
| 04323_A._capsulatum  | .....ASGVNWSWDK.....                                       |
| 00533_B._fuckeliana  | .....EGGTAVKQIVFAGG.....                                   |
| Chi18_1_H._jecorina  | .....QDSYSNIVVYN.....                                      |
| Chi18_8_H._jecorina  | .....GDSASNILEYGNG.....                                    |
| Chi18_9_H._jecorina  | .....KDTASDYLVIN.....                                      |
| Chi18_10_H._jecorina | .....EKTDSDYLIYN.....                                      |
| 02650_A._capsulatum  | .....EVASSFERALAGGRYDDYVPIHYGGV.....                       |
| AN0221_E._nidulans   | .....ELAASFEEKAKISGEYDPF.....                              |
| 06020_N._crassa      | .....HLRASVDRLAQGVYDHD.....                                |
| EAA76014_G._zeae     | .....DVAQSFSRARYDGKYDVD.....                               |
| Chi18_4_H._jecorina  | .....ELNESFTRAQAHGFYDYD.....                               |
| 09277_P._nodorum     | .....ELSNSFDKALKHGVCDRE.....                               |
| 05838_A._capsulatum  | EDGFCCSSAG.....                                            |
| EAA69039_G._zeae     | PAGSCCAASGWCSTPAHCGTGCSAFG.KCDGVDINNSFHKALKDGRDITV.....    |
| MGG_06594_M._grisea  | AEGDCCSQYGF CGNTAAHCGTGCFGYG.KCDGFSTKDSFQKAIANGKTDEA.....  |
| Chi18_11_H._jecorina | .K.....LEHAVANGIADEE.....                                  |
| 02644_A_P._nodorum   | SSG.CCSQYGNCGNSPEHC SGACQHAFGTGCTDPDVAGSWQSALAGGMTDNR..... |
| AN9447_E._nidulans   | PAGTCCSIYGNCGTGDDFCLAACDSNFG.ECKGVPIQDSWRRARAEGQTDEE.....  |

|                      |                                                  |                |     |                         |     |     |
|----------------------|--------------------------------------------------|----------------|-----|-------------------------|-----|-----|
|                      | 910                                              | 920            | 930 | 940                     | 950 | 960 |
| NP_979924_B._cereus  | .... ... ... ... ... ... ... ... ... ... ... ... |                |     |                         |     |     |
| YP_077302_B._licheni | ....E..NGVQ.H.....                               | ....EVWFE..... |     | ....DARSIQSKFNLMEQ.GI   |     |     |
| YP_091539_B._licheni | ....N..AGKQ.H.....                               | ....EVWFE..... |     | ....DARSIQAKFDLIREL.NL  |     |     |
| YP_079121_B._licheni | ....E..QGRR.H.....                               | ....VWFE.....  |     | ....DARSIGKKLQLITEY.GL  |     |     |
| YP_074366_S._thermop | ....E..QGRR.H.....                               | ....VWFE.....  |     | ....DARSIGKKLQLITEY.GL  |     |     |
| YP_074366_S._thermop | ....E..QGR.T.H.....                              | ....EVWFE..... |     | ....DARSIQAKFNLLKEL.GL  |     |     |
| YP_075811_S._thermop | ....A..QGENE.H.....                              | ....IVWFE..... |     | ....DARSLQAKFDITVKEY.GL |     |     |
| YP_075619_S._thermop | ....A..DGAE.H.....                               | ....IVYFE..... |     | ....NSRSAAAKLRLVGRY.GL  |     |     |

|                      |                      |             |                      |
|----------------------|----------------------|-------------|----------------------|
| ZP_01354047_C._phyto | .....EGVD.H.....     | EVWFE.....  | DVRSIKAKLDLVKEY.DF   |
| ZP_01354926_C._phyto | .....DGAK.Y.....     | KIWLE.....  | EEESI EAKLKLISEA.DL  |
| NP_902406_C._violace | ....A..DGSR.H.....   | TVWTE.....  | NARSVALKASLVNAY.GL   |
| ZP_01136704_A._cellu | ....A..SGVQ.H.....   | SVWYN.....  | DANALQARLPLVGKY.GL   |
| ZP_00526542_S._usita | .....DGIR.E.....     | YVFYN.....  | DARSFEDRYAMARER.GL   |
| AAF46212.1_D._melano | ...QE.....           | WISYE.....  | NQTSIACKANYVKS.L.NL  |
| AAF46534.1_D._melano | ...ADDSGENG.V.....   | WVGYE.....  | DPDTAAIKAEYVKRE.GL   |
| AAF46544.1_D._melano | ...NQ.....           | WVGYD.....  | DEAIVRKKAEYVVAQ.GL   |
| At4g19720_A._thalian | ...TS.....           | LIGYD.....  | DHQSVVAKVKYAKQK.GL   |
| At4g19750_A._thalian | ...TT.....           | WIGYD.....  | DNQSI VSKVRYAKLK.GL  |
| EAA67655_G._zeae     | .....RKK.R.....      | ELVTMD..... | DLKSAQAKAGYINER.NL   |
| EAA73155_G._zeae     | .....ANT.K.....      | ELISFD..... | TPGMVENKVLVYVKNK.SL  |
| EAA74986_G._zeae     | .....SIM.H.....      | ELISYD..... | TPEEVEKKVDYVLKH.GL   |
| EAA74223_G._zeae     | .....PQT.R.....      | TMVTYD..... | TPRVAVDKAEYVRKW.KL   |
| MGG_05533_M._grisea  | .....NST.G.....      | QLISYD..... | DLKSVQFKSDYVQKQ.QI   |
| MGG_01247_M._grisea  | .....AAK.R.....      | EFVTYD..... | TVDSAREKTRYMKQK.GL   |
| MGG_00086_M._grisea  | .....AAR.R.....      | EMVTYD..... | TADNVRKVDWARAR.GL    |
| MGG_07927_M._grisea  | .....PAT.R.....      | HMVTYD..... | TVPLARRKAEFIRER.GL   |
| Chi18_6_H._jecorina  | .....NAT.R.....      | ELVTYD..... | NMETTTTLKAEYLGKK.GL  |
| Chi18_5_H._jecorina  | .....PST.K.....      | ELISFD..... | TPDVVNTKVSYLKSL.GL   |
| Chi18_7_H._jecorina  | .....PQT.R.....      | KLVSYD..... | TPYAARAKARYVKEW.GL   |
| 04883_N._crassa      | .....ETN.K.....      | VMVSYD..... | TPEMVKQKVSYIKEK.GL   |
| 04554_N._crassa      | .....PGT.K.....      | TLVSYD..... | TPGMARMKAEYIRER.GL   |
| 11407_B._fuckeliana  | .....NST.K.....      | ELVSYD..... | NVKAIQTKTEYIMSS.GL   |
| 05350_B._fuckeliana  | .....ENT.K.....      | TLISYD..... | TVEVGRRKAHYIKQR.GL   |
| 11700_S._sclerotioru | .....NVT.K.....      | ELISYD..... | NVKSVMKTKYIMTS.GL    |
| 11304_S._sclerotioru | .....EDT.K.....      | TLITYD..... | TV EIARRKAYYIKER.GL  |
| 08020_S._sclerotioru | .....TSK.R.....      | EIISYD..... | NPMVAIQKAQWIQSM.NL   |
| 01250_A._capsulatum  | .....KTA.R.....      | KMISYD..... | TPTIAAAKVDHIRRR.GM   |
| 05886_A._capsulatum  | .....KSS.R.....      | SMISYD..... | TVPMVEKKTKYIINK.GL   |
| 06565_A._capsulatum  | .....SSS.R.....      | TMISYD..... | NVAMVEEKKTKYIIQK.GL  |
| 05250_C._immitis     | .....PSA.K.....      | KMISYD..... | TPHMAQRKAEYIRNR.GL   |
| 02795_C._immitis     | .....KNK.R.....      | YLISYD..... | TVKIAGKKA EYITKN.GM  |
| 03822_C._immitis     | .....PSK.K.....      | LMISYD..... | TVPMVEAKTKYIVDK.GL   |
| AN5454_E._nidulans   | .....EDK.K.....      | EVISYD..... | NVGVRHKG VLYMRL.GM   |
| AN4871_E._nidulans   | .....PSS.R.....      | EMVSYD..... | TVAADLKAAYIQSR.RL    |
| 00269_P._nodorum     | .....QGQ.R.....      | LMISYD..... | TPQVIQKKS ELVKSM.GL  |
| 04870.1_C._cinereus  | .....KTT.R.....      | EMISFD..... | TP E IARLKGQFIRDN.GL |
| 09921.1_C._cinereus  | .....PVK.R.....      | ELVSYD..... | TPNIVRMKAIYVEKN.GL   |
| 124149_P._chrysospor | .....YQT.R.....      | EMVSFD..... | SEKVGAAKGAWIARE.GL   |
| 134311_P._chrysospor | .....SAK.K.....      | ELVSYD..... | TPHIASLKAQYVNSN.NL   |
| 03412_F._neoformans  | .....PAK.R.....      | LLITYD..... | TQAI AHQKASYIAYH.GL  |
| 13635_R._oryzae      | .....PNA.R.....      | ELITYD..... | TPQIVSAKCSYLLQR.KL   |
| UM04261_U._maydis    | .....SAK.R.....      | EFISYD..... | TPQNVLLKCCQYIRNK.RL  |
| EAA69503_G._zeae     | .....GAD.G.....      | GFVTYD..... | NPDTVKMKAGFCKQK.GL   |
| EAA70860_G._zeae     | .....NKSD.K.....     | GFVSFD..... | VPSTVSIKAGYAKAL.GL   |
| Chi18_3_H._jecorina  | .....GGD.G.....      | GFVTYD..... | NHETVKVKA EFCQK.GL   |
| Chi18_2_H._jecorina  | .....ANGD.K.....     | GYLTFD..... | VPRTVHMKARFAMQR.GL   |
| 03026_N._crassa      | .....GGD.G.....      | GFVTYD..... | NPDTVKAKATFCKQK.GL   |
| 01594_B._fuckeliana  | .....GGD.G.....      | GWVSYD..... | NPQ TGLFYWTGTAD....  |
| 05897_S._sclerotioru | .....GGD.G.....      | GWVSYD..... | NPQTVKMKAEYCRQR.RL   |
| 04742_A._capsulatum  | ....SGSGGE.GPAA..... | GFISYD..... | SPRTVMQKAQFVSEY.EL   |
| 04750_C._immitis     | .....DRN.M.....      | GFVSYD..... | STRTVVQKAKFVREM.AL   |
| 04719_P._nodorum     | .....GGD.G.....      | GFVTYD..... | TPQTVRMKADYVRQN.AL   |
| MGG_08458_M._grisea  | .....GEGG.K.....     | GFVSLD..... | TPATVRLKAGYVRAN.GL   |
| CHT4_C._albicans     | .....SHS.K.....      | QLITFD..... | NPQCARIKASFVQSR.QL   |
| 01119_L._elongisporu | .....LKT.K.....      | QFITYD..... | NVQS AKIKGSYVKLH.EL  |
| XP_454053_K._lactis  | .....PKS.R.....      | TFVGYD..... | NVQSM DIKGK YIKKK.NL |
| CTS2_S._cerevisiae   | .....EKN.S.....      | IFISYD..... | NTKSVKTKAEYVTHN.NL   |
| 246746_L._bicolor    | .....PQK.R.....      | EMVSFD..... | NEDVADWKGQYIKNQ.GL   |
| 03209_N._crassa      | .....ALS.R.....      | ELITYD..... | NVLSALVKTKYIFLR.GL   |
| 14474_P._nodorum     | .....PVK.K.....      | EVVSFD..... | TPKTAVVKTDFLKSE.GL   |

|                      |                                               |
|----------------------|-----------------------------------------------|
| CE06282_C._elegans   | .....RTI.G.....IYLTFE.....TKESIRAKIDYVKDR.IL  |
| CE03547_C._elegans   | .....ATT.E.....TFLTFE.....TNDTIAAKIDYVKDR.IL  |
| CE03542_C._elegans   | .....PKE.K.....TFLTFE.....NERSIEKKLQYVNM.NL   |
| CE15845_B_C._elegans | .....PET.K.....ELLTFE.....TDRSINEKTKYIKRV.NI  |
| CE02997_C._elegans   | .....PGPPT.....RFMTLE.....EERSLREKNRYVADH.NI  |
| CE36953_C._elegans   | .....SEQ.K.....TFVGYE.....NAESLKHKVDYIVEN.NI  |
| YP_432439_H._chejuen | .....AEK.R.....VFLSIE.....DEESIGVKANYVVDN.GI  |
| YP_529449.1_S._degra | .....AAK.Q.....VFISTE.....DEQSINRKADYVVEN.GI  |
| YP_077582_B._licheni | .....PEK.K.....VFLSTE.....DEESIKTKADYVIDK.GI  |
| ChiI_S._coelicolor   | .....AEK.K.....VFLSTE.....DEQSVGAKADYVADR.GI  |
| NP_902986_C._violace | .....AGK.K.....VFLSTE.....DEQSIAQKAAWIDAN.NV  |
| ZP_01159608_Photobac | .....AEK.S.....VFISTE.....DKASVGVKADYVIDK.EI  |
| ZP_01234708_V._angus | .....AEK.S.....VFISTE.....DKASVSVKADYVIDK.EI  |
| NP_233087_V._cholera | .....AEK.K.....VFLSTE.....DKQSIDVKADYVIDK.EI  |
| NP_230718_V._cholera | .....DTK.K.....VFLSIE.....DKDSLKPCLDYIVDN.GL  |
| AAO07185_V._vulnific | .....AEK.A.....VFLSTE.....DKASVSVKADYVIDK.EI  |
| ZP_01354150_C._phyto | .....G...D.....ILITYE.....DLEAIRYKVDTVKKL.RL  |
| ZP_01246933_F._johns | .....AQT.K.....TFATSD.....DLKSIKAKTEYVKEK.KL  |
| YP_012734_L._monocyt | .....KET.G.....EFYTYD.....NTRSIGYKAQYVKDN.NL  |
| YP_529337.1_A_S._deg | .....AE.NN.....IFVTYD.....DAQSLVYKTDYIKQQ.GL  |
| ChiA_A_P._kodakarae  | .....PSK.R.....IFITFD.....DPRAIGIKVDYMLKN.GL  |
| AAG19274_Halobacteri | .....PSK.N.....VLVSVD.....SPRSVEAKTAYAAQH.DI  |
| AAG19275_Halobacteri | .....DSE.G.....VFISYD.....DPTSLAAKVELAVAE.DL  |
| CE03543_C._elegans   | .....PDE.R.....RFFTFE.....NQKSIAIKTRYAIDM.NL  |
| CE34961_C._elegans   | .....QET.G.....NFLTFE.....NKKSLIAKLAYAIH.NL   |
| CE20043_C._elegans   | .....PDT.R.....NFVTFE.....TDKSIQEKMKYVKEK.NL  |
| CE15845_A_C._elegans | .....KNK.N.....TFVTLE.....SDRSIREKKKYVCDM.KL  |
| CE32863_A_C._elegans | .....KNK.N.....TFVTLE.....SDRSIREKKKYVCDM.KL  |
| CE03544_C._elegans   | .....LKT.R.....TFFTYE.....NEKSIKVKLDYVNMK.DL  |
| CE08731_C._elegans   | .....SKANYVSK.NL                              |
| CE28638_C._elegans   | .....NST.K.....TFLAFE.....TEKSIHAKIEYVMNK.NL  |
| CE32863_B_C._elegans | .....PET.K.....ELLTFE.....TDRSINEKTKYIKRV.NI  |
| CE01673_C._elegans   | .....PEK.K.....EIQRFN.....S....STKTEYTK.L.QM  |
| CE02993_C._elegans   | .....PGPPT.....WFMTLE.....DKRSLREKTKYVADY.NI  |
| CE02996_C._elegans   | .....PGPPT.....WFLTLE.....DEKSLREKNRYVADH.NI  |
| CE02995_C._elegans   | .....PGS.S.....LFLTLE.....DEQSLRVKNRYVADH.NI  |
| CE02992_C._elegans   | .....PKS.K.....IFLAFE.....NEKSLSEKVIYVRNK.NI  |
| CE02999_C._elegans   | .....ADT.Q.....QFLTFE.....NEKSLTEKMNYAVAH.NI  |
| CE02998_C._elegans   | .....SEE.R.....KFFVFE.....NERSLQAKMDYAADH.NI  |
| CE09229_C._elegans   | .....NGA.K.....KFLGFE.....NERSLKEKMKYATDR.NL  |
| CE12928_C._elegans   | .....NGA.R.....MFLGFE.....NERSLKEKMDYATNR.NL  |
| CE23907_C._elegans   | .....STT.V.....RYLTFE.....TERSIREKTGYVKDG.VM  |
| CE32917_C._elegans   | .....STT.K.....EYLTFE.....TEKSLIAKVNYVKDR.AL  |
| CE34579_C._elegans   | .....STT.K.....EYLTFE.....VKRSIAAKLDYVQNM.NL  |
| CE25073_C._elegans   | .....ATT.E.....TFLTFE.....TNDTIAAKIDYVKDR.IL  |
| CE03548_C._elegans   | .....ATT.E.....TFLTFE.....TNDTIAAKIDYVKDR.IL  |
| NP_469498_L._innocua | .....KET.G.....EFYTYD.....NTRSIGYKAQYVKDN.NL  |
| CE08730_C._elegans   | .....PET.K.....TFITFE.....TEKSLIAKANYVKSM.NL  |
| Q8U1H4_P._furiosus   | .....LKA.K.....TFLTFE.....DKRSIKIKTDYAKKM.DL  |
| CE12474_C._elegans   | .....PGPPT.....RFLTLE.....DEQSLREKNRYVADH.NI  |
| CE02990_C._elegans   | .....SST.K.....IYLTFE.....TDQSIVAKIEYVSEH.LL  |
| CE40270_C._elegans   | .....PGPPT.....RFMTLE.....DEKSLREKNRYVADH.NI  |
| ChiB_S._marcescens   | .....AQ.NG.....LFVTYD.....DAESFKYKAKYIKQQ.QL  |
| O10363_O._pseudotsug | .....KER.G.....DLISFD.....SVDSVLAKNVYVQQN.GL  |
| AAP29899_C._fumifera | .....KDK.G.....DLISFD.....SVDSVLAKNSYVDQN.GL  |
| AAV73807_B._mori_NPV | .....KSK.G.....DLISFD.....SVDSVLGKVKYVDRN.KL  |
| AAL56186_H._zea_SNPV | .....RAS.G.....DLISYD.....SERSVLAKGEYVLKR.RL  |
| AAF33549_S._exigua_N | .....REN.G.....NLITYD.....DPKSVADKTKYVLDH.EL  |
| AAZ38189_A._segetum  | .....RES.G.....NLISYD.....DPKSVADKTKYVIDH.EL  |
| AAS82706_A._segetum  | .....ENV.G.....DLLTYD.....NPTSVQAKGKFVIDN.NL  |
| ZP_01159013_Photobac | .....RST.G.....DLITFD.....DDRSVKAKGNYVKS.L.GL |



|                      |       |                             |               |                     |
|----------------------|-------|-----------------------------|---------------|---------------------|
| ZP_01161077_Photobac | ..... | PTT.G.....                  | ELITYD.....   | TPRAVKAKAQYVLQH.NL  |
| ZP_01159325_Photobac | ..... | EEK.Q.....                  | VFISYD.....   | DSHSVKAKADWVKKN.KL  |
| ZP_01160869_Photobac | ..... | RKK.N.....                  | EYISFE.....   | DKRSLQAKADYVKKH.KL  |
| ZP_01233025_V._angus | ..... | RST.G.....                  | DLITFD.....   | DERSVKAKGNVYKSL.GL  |
| ZP_01236284_V._angus | ..... | PTT.G.....                  | ELITYD.....   | TPRAVKAKAQYVLQH.NL  |
| ZP_01235109_V._angus | ..... | EEK.Q.....                  | VFISYD.....   | DSRSVKAKADWVKKN.KL  |
| ZP_01235465_V._angus | ..... | QKK.N.....                  | EYISFE.....   | DKRSLQAKVDYVKKH.QL  |
| AAO08114_V._vulnific | ..... | RTT.G.....                  | ELITFD.....   | DHRSVLAKGAYAKSL.GL  |
| AAO07498_V._vulnific | ..... | PEK.K.....                  | VFISFE.....   | DQRSIKAKAQWAKQS.NL  |
| NP_232428_V._cholera | ..... | RTT.G.....                  | QLVTFD.....   | DDRSVKAKGAYVRNL.GL  |
| YP_432951_H._chejuen | ..... | PAI.G.....                  | SFITIE.....   | SPRTAALKAQYAKDN.GF  |
| YP_529337.1_B.S._deg | ..... | SST.G.....                  | EFISYD.....   | SPRSIAAKADYVKQY.NL  |
| YP_435912_H._chejuen | ..... | FSN.G.....                  | SLITYD.....   | NARSVKAKGEYVRDK.GL  |
| ZP_01137509_A._cellu | ..... | YDG.T.....                  | TFYTGE.....   | SAQSIRARTDYVHCK.GL  |
| ChiE_S._coelicolor   | ..... | GPG.G.....                  | QWWSFD.....   | DTWSIGKKTWVWVSK.GL  |
| ChiC_S._coelicolor   | ..... | HCG.S.....                  | NWWSYD.....   | TPATIKSKMDWAEQQ.GL  |
| ChiD_S._coelicolor   | ..... | KCG.S.....                  | DWWSYD.....   | TPQTIATKMAYKNEQ.GL  |
| NP_903910_C._violace | ..... | YDG.N.....                  | EFWSYD.....   | DPATIRGKLDYVRSQ.QL  |
| YP_529072.1_S._degra | ..... | KCG.S.....                  | NWWSYD.....   | TPATIDSKMDYAKQQ.GL  |
| ZP_01431615_S._tropi | ..... | KCG.N.....                  | NWWSYD.....   | TPSTINGKMTYAKNE.GL  |
| ZP_01136287_A._cellu | ..... | QAS.E.....                  | TLYVVD.....   | DPVEIGQKMHYILRR.DL  |
| 01315.1_C._cinereus  | ....  | TPYVYNR.TTEI.....           | MVAFD.....    | NAQSFAAKGNFIKSN.GL  |
| 03252.1_C._cinereus  | ....  | TPFVYNP.ETQV.....           | YVSYE.....    | NPRSYYAAGDFIYST.GL  |
| 05285.1_C._cinereus  | ....  | TPFLYRE.SDSR.....           | MVSFD.....    | DARSFAAKGRFINEK.GL  |
| 05291.1_C._cinereus  | ....  | TPFVYQK.DTGT.....           | MITYD.....    | DAESTAAGNFIKAEQ.GL  |
| 01586.1_C._cinereus  | ....  | TPYLENT.AQQT.....           | VISYD.....    | DTWSLNDKAKLARDS.GM  |
| 128098_P._chrysospor | ....  | TPYIYLE.DRQT.....           | MVAYD.....    | DPTSIAAKGKFIAEQ.GL  |
| 39872_P._chrysospori | ....  | TPYVYNK.TSQI.....           | MVSFD.....    | DPAAFKAKEGFIKSA.GL  |
| 138098_P._chrysospor | ....  | TPFLYDP.NTST.....           | MISYD.....    | DPQSFAAKGRFIHES.RL  |
| 129436_P._chrysospor | ....  | TPFLRSA.RAGQ.....           | VVAYD.....    | DPQSLELKAALARYA.GL  |
| EAA71245_G._zeae     | ....  | TPFLYDE.EKQI.....           | YVSYD.....    | NARSFTEKGKFKVAK.GL  |
| MGG_04732_M._grisea  | ....  | TPFVYNN.ATSW.....           | WVSYD.....    | DSKSLGVKGKYITDN.KL  |
| UM06190_U._maydis    | ....  | TPYLSDA.SR.....             | VITYD.....    | DTSSIFDKGAFASAA.GI  |
| 04245_F._neoformans  | ....  | TPWLKSS.ESGQ.....           | IVTYD.....    | DTESMNLKAQFAAQA.GL  |
| 16170_R._oryzae      | ....  | TPYAYHA.GKHT.....           | FLSYD.....    | NTKSFEAKLNYVKSE.GL  |
| 01334_R._oryzae      | ....  | TPYAYHA.GNST.....           | FLTYD.....    | NPKSFEAKLDYVKSQ.GL  |
| 13934_R._oryzae      | ....  | TPFAYKQ.DNQO.....           | FVTFD.....    | NPTSIRIKSNYVNE.NL   |
| 07611_R._oryzae      | ....  | TPWLYNP.TNKQ.....           | YISYD.....    | DPVSLKVKVQYAIHQ.GL  |
| 10252_R._oryzae      | ....  | TPWLFNP.TTQH.....           | YITYD.....    | DPQSLNIKVQHALCE.DL  |
| 14659_R._oryzae      | ....  | TPWLFNP.KTNI.....           | FISYD.....    | DPKSISKKACYAHNK.HL  |
| 231399_L._bicolor    | ....  | TPYVYNK.ETQS.....           | MVSYD.....    | DTRSFAAKGQFIKTA.GL  |
| 180319_L._bicolor    | ....  | TPYVYNP.STSV.....           | EISYD.....    | DAKSFAAKGSFIKEK.AL  |
| 191848_L._bicolor    | ....  | TPYVYNP.STNV.....           | EISYD.....    | DATSFAADKGSFINEK.GL |
| 317003_L._bicolor    | ....  | TPYLENV.AQKT.....           | VVTYD.....    | DTWSLTDKAKFAKQS.GM  |
| 246840_L._bicolor    | ....  | TPYMYNA.TSQV.....           | YVSFD.....    | NAQSFAAKGDFIHSK.GL  |
| 144643_L._bicolor    | ....  | TPFLRSS.SSGQ.....           | VVTYD.....    | DLVSVRMKAAPVKEL.GM  |
| 310136_L._bicolor    | ....  | TPFVYNP.TAQT.....           | MLS YD.....   | DARSFAAKGNYISSN.GL  |
| 629882_M._xanthus    | ....  | ASYVTFD.VPVEDGTVRWISYD..... |               | SPQTIAAKGAFAH.DNGY  |
| 630509_A_M._xanthus  | ..... |                             |               |                     |
| YP_592598_Acidobacte | ....  | SPYLLYQ.GTGGK.....          | DGLISYD.....  | DPISTALKTYVVLKTRDF  |
| YP_446903_S._ruber   | ..... | PDS.S.....                  | VLITHE.....   | TPRSLRAKAHYVQSR.GL  |
| ZP_00739282_B._thuri | ..... | ATT.G.....                  | TFISYD.....   | DNESMKYKTDYIKTK.GL  |
| ZP_01245639_F._johns | ..... | STL.K.....                  | QFISYE.....   | DKQSMDLKVQYIKSR.NL  |
| NP_976824_B._cereus  | ..... | ATT.G.....                  | TFISYD.....   | DNESMKYKTDYIKTK.GL  |
| YP_077581_B._licheni | ..... | AEN.G.....                  | NFITYD.....   | DEQSFHGKTDFIKAN.GL  |
| 631138_M._xanthus    | ..... | PAT.G.....                  | IWIGYD.....   | DVQSINAKADYILNK.NL  |
| ZP_01247029_F._johns | ..... |                             | NTIYYN.....   | GIPTIKQKTTFA..VQNA  |
| ZP_01234549_V._angus | ....  | K.....                      | NNTTHYYN..... | GLPTIRSKVHLAKDDYHL  |
| ZP_01160697_Photobac | ....  | K.....                      | NNTTHYYN..... | GLPTIRSKVHLAKDDYHL  |
| ZP_01158584_Photobac | ....  | K.....                      | DGVTHYYN..... | GLPTIRSKVHLA..EDYHL |
| AN0549_E._nidulans   | ....  | N.....                      | Q.....        | DAETFKMKQAQFAAGQ.CL |
| AN8481_E._nidulans   | ....  | N.....                      | Q.....        | DAETFKLKAQFASSQ.CL  |

|                      |                  |            |                       |                    |     |
|----------------------|------------------|------------|-----------------------|--------------------|-----|
| AN9390_E._nidulans   | ....N.....Q..... | WVSyd      | .....                 | DDETLKAKMEYANEL    | .CL |
| AN0517_E._nidulans   | ....T.....Q..... | WISyd      | .....                 | DEQSFFDKKKYVSE     | .CL |
| AN0541_E._nidulans   | ....N.....Q..... | WITYD      | .....                 | DEESFEKKREMLDNE    | .CF |
| AN5077_E._nidulans   | ....N.....S..... | WVSyd      | .....                 | DATTFAAKIDYAKRI    | .GL |
| AN0509_E._nidulans   | ...DN.....Q..... | WVAYMS     | .....                 | PEVRESRVSRYSKL     | .NM |
| AN7613_E._nidulans   | ...DT.....Q..... | WVGfMS     | .....                 | KSTMRRRVEREKEM     | .KF |
| 07035_N._crassa      | ....D.....Q..... | WVTFD      | .....                 | DAATWRLKANIIRGQ    | .CI |
| 07484_N._crassa      | ...NN.....Q..... | WVAFMD     | .....                 | DSIRAARTAIYKGL     | .GM |
| 05317_N._crassa      | ...NT.....Q..... | WVGyMS     | .....                 | AATKKSRAALYTAW     | .GM |
| EAA74768_G._zeae     | ....R.....E..... | WASyd      | .....                 | DAETLKLKVNRAEER    | .CL |
| EAA78168_G._zeae     | ....D.....Q..... | WVSyd      | .....                 | DRDTWKLKAKFLKSQ    | .CL |
| EAA75711_G._zeae     | ....D.....Q..... | WIGYD      | .....                 | DEETFAAKKAWADGY    | .CF |
| EAA68447_G._zeae     | ...NT.....E..... | WVSyMS     | .....                 | PSTKMARETVYKAF     | .GM |
| EAA77156_G._zeae     | ...MT.....D..... | WVAYMG     | .....                 | PTTKLKRTQWVQGL     | .NF |
| 12510_S._sclerotioru | ....N.....Q..... | WVAYD      | .....                 | DEETFKLKSEYAQSS    | .CL |
| 00773_S._sclerotioru | ....D.....Q..... | WVSFD      | .....                 | DQETFKIKSDFAKSQ    | .CL |
| 05454_S._sclerotioru | ....D.....Q..... | WVSyd      | .....                 | DFDTIQQKIEFANSL    | .GL |
| 00677_S._sclerotioru | ....R.....Q..... | WMGFD      | .....                 | DFETWGLKRRFADGL    | .CM |
| 02128_S._sclerotioru | ...DD.....Q..... | WISyMN     | .....                 | DANKIVRTALYKH      | .NF |
| MGG_04534_M._grisea  | ....D.....Q..... | WVSFD      | .....                 | DVETLKIQQDYANRR    | .CL |
| MGG_01336_M._grisea  | ....N.....Q..... | WVGyD      | .....                 | DAQTWAACKTWADSV    | .CI |
| 14527_P._nodorum     | ....N.....Q..... | WVSyd      | .....                 | DDDTFQKKRDFSNKR    | .CL |
| 15411_P._nodorum     | ....D.....S..... | WVGyD      | .....                 | DAETYAMKEAFANDR    | .CL |
| 02214_P._nodorum     | ....D.....Q..... | WIAWD      | .....                 | DTNTLGKKLELANDR    | .CL |
| 04761_C._immitis     | ....D.....Q..... | WVSyDHTVSL | LGLEGANCSQDDAETFKQKKE | LADEL              | .GL |
| 04323_A._capsulatum  | ....D.....Q..... | WVSyd      | .....                 | DGRTLKQKADFGNKL    | .CL |
| 00533_B._fuckeliana  | ....R.....Q..... | WMGFD      | .....                 | DEESWGLKRRYADQL    | .CI |
| Chi18_1_H._jecorina  | ...GT.....Q..... | WVAFMN     | .....                 | DSNKATRTALYPSI     | .NF |
| Chi18_8_H._jecorina  | ...AV.....D..... | WVAYMD     | .....                 | GGLKAERIKWIQLL     | .NF |
| Chi18_9_H._jecorina  | ...DV.....E..... | WVAYMS     | .....                 | DKTKQSRREKWKGL     | .NF |
| Chi18_10_H._jecorina | ...QT.....Q..... | WVAYMS     | .....                 | KSVKEARIKKYQAL     | .NF |
| 02650_A._capsulatum  | GGGGHYFWDK.KENI  | ...WWTWD   | .....                 | TGEAIKKKMQPIMVARGL |     |
| AN0221_E._nidulans   | ..GGGYFWDS.NENI  | ...FWSWD   | .....                 | TANAIKRKFPAILEKRKL |     |
| 06020_N._crassa      | ..QGGYYWDP.TEAL  | ...WVTFD   | .....                 | TPDAIKQKFPKVMKRRL  |     |
| EAA76014_G._zeae     | ...GSYYYWDE.QELR | ...WVSFD   | .....                 | TTRSIIQTKEFIVPQLKL |     |
| Chi18_4_H._jecorina  | ...GSYGYWDA.EEKR | ...WVSyd   | .....                 | TPDTIGARIAWLVGQLEL |     |
| 09277_P._nodorum     | ..SGGCTYWDA.DERL | ...FWSWE   | .....                 | SKDTIYRKLRVVIGEMKL |     |
| 05838_A._capsulatum  |                  | YW         | .....                 |                    |     |
| EAA69039_G._zeae     | ..NGGQYWDS.ETRI  | ...FWTWD   | .....                 | TAELIAQKIAFMAQTRGV |     |
| MGG_06594_M._grisea  | ..LGAQYWDS.TASL  | ...YWSWD   | .....                 | TPALMKQKINDIVFAKGL |     |
| Chi18_11_H._jecorina | ..EGGQWWDA.AEEV  | ...YWTWD   | .....                 | TADLVARKFSEIVVPKKL |     |
| 02644_A_P._nodorum   | ..AGGQYFDDT.ENNL | ...FWTWD   | .....                 | TPALISRKFDDIVRKYKL |     |
| AN9447_E._nidulans   | ..GGGQYYMDT.QNHL | ...FWTWD   | .....                 | TPTLMTRKFTETVDVEKL |     |

970

|                      |              |             |  |
|----------------------|--------------|-------------|--|
| NP_979924_B._cereus  | .... .... .. | GGISYWKIGLP |  |
| YP_077302_B._licheni |              | RGISYWKLGLS |  |
| YP_091539_B._licheni |              | DGGGVWQLTSL |  |
| YP_079121_B._licheni |              | DGGGVWQLTSL |  |
| YP_074366_S._thermop |              | RGISYWKLGLD |  |
| YP_075811_S._thermop |              | RGVSYWVLGNP |  |
| YP_075619_S._thermop |              | GGIAIWRLGLN |  |
| ZP_01354047_C._phyto |              | RGVGYWQLMRL |  |
| ZP_01354926_C._phyto |              | AGVASWRLGFE |  |
| NP_902406_C._violace |              | GGTSLYALGME |  |
| ZP_01136704_A._cellu |              | GGVAFWSFGDE |  |
| ZP_00526542_S._usita |              | HGISAWILGSE |  |
| AAF46212.1_D._melano |              | GGVMVFSLNTD |  |
| AAF46534.1_D._melano |              | GGIAVVDLSFD |  |
| AAF46544.1_D._melano |              | GGIMFWAIDND |  |
| At4g19720_A._thalian |              | LGYFSWVHGAD |  |

|                      |                |
|----------------------|----------------|
| At4g19750_A._thalian | LG YFSW HVGAD. |
| EAA67655_G._zeae     | GGAFYWEARGD.   |
| EAA73155_G._zeae     | GGSMFW EASAD.  |
| EAA74986_G._zeae     | GGSMFW EASGD.  |
| EAA74223_G._zeae     | GGAMWWESSAD.   |
| MGG_05533_M._grisea  | GGVMFW ESSQD.  |
| MGG_01247_M._grisea  | GGAVFW EASGD.  |
| MGG_00086_M._grisea  | GGSMFW ELSGD.  |
| MGG_07927_M._grisea  | GGAMWWESSAD.   |
| Chi18_6_H._jecorina  | GGAVFW EASGD.  |
| Chi18_5_H._jecorina  | GGSMFW EASAD.  |
| Chi18_7_H._jecorina  | GGGMWWESSAD.   |
| 04883_N._crassa      | GGAMYWEASGD.   |
| 04554_N._crassa      | GGAMWWESSAD.   |
| 11407_B._fuckeliana  | GGAMFW ESSGD.  |
| 05350_B._fuckeliana  | GGAMV.....     |
| 11700_S._sclerotioru | GGAMFW ETSAD.  |
| 11304_S._sclerotioru | GGAMWWESSAD.   |
| 08020_S._sclerotioru | GGAMWWESSAD.   |
| 01250_A._capsulatum  | GGGMWWE LSGD.  |
| 05886_A._capsulatum  | GGGMWWEASGD.   |
| 06565_A._capsulatum  | GGGMWWESSGD.   |
| 05250_C._immitis     | GGAMWWE LSGD.  |
| 02795_C._immitis     | GGGMWWESSSD.   |
| 03822_C._immitis     | GGAMWWEASGD.   |
| AN5454_E._nidulans   | GGGMWWESSGD.   |
| AN4871_E._nidulans   | GGAMWWE TSAD.  |
| 00269_P._nodorum     | GGGMWWESSSD.   |
| 04870.1_C._cinereus  | GGSMFW ELSGD.  |
| 09921.1_C._cinereus  | GGTMFW ELSTD.  |
| 124149_P._chrysospor | GGSMFW ELSGD.  |
| 134311_P._chrysospor | GGNMFW DLSTD.  |
| 03412_F._neoformans  | GGAMWWE LDDSD. |
| 13635_R._oryzae      | GGAMFW EL SAD. |
| UM04261_U._maydis    | RGAMFW ELSGD.  |
| EAA69503_G._zeae     | GGLFYWNAPAD.   |
| EAA70860_G._zeae     | GGLFYWTGAGD.   |
| Chi18_3_H._jecorina  | GGLFYWNGPAD.   |
| Chi18_2_H._jecorina  | GGLFYWTGTGD.   |
| 03026_N._crassa      | GGLFYSSAPSD.   |
| 01594_B._fuckeliana  | .....          |
| 05897_S._sclerotioru | G.....         |
| 04742_A._capsulatum  | GGLFYWH LAAD.  |
| 04750_C._immitis     | GGLFYWHVAAD.   |
| 04719_P._nodorum     | GGLFYWTGTGD.   |
| MGG_08458_M._grisea  | AGLFYWQGVGD.   |
| CHT4_C._albicans     | GGGMWWD SAGD.  |
| 01119_L._elongisporu | GGGMWWD SSGD.  |
| XP_454053_K._lactis  | NGGFWWE SCGD.  |
| CTS2_S._cerevisiae   | GGGFWWE SCGE.  |
| 246746_L._bicolor    | GGSMFW ELSGD.  |
| 03209_N._crassa      | GGAVFW EASGD.  |
| 14474_P._nodorum     | GGAWWWD SSSD.  |
| CE06282_C._elegans   | GGVWIFSV DMD.  |
| CE03547_C._elegans   | GGVWIWAV DMD.  |
| CE03542_C._elegans   | GGVWIWSV DMD.  |
| CE15845_B_C._elegans | GGVCLWAV DMD.  |
| CE02997_C._elegans   | GGITMTID QD.   |
| CE36953_C._elegans   | GGVMIWAID FD.  |
| YP_432439_H._chejuen | GGVMFW ELAGD.  |
| YP_529449.1_S._degra | GGIMFW ELAGD.  |
| YP_077582_B._licheni | GGVMFW DLSGD.  |

|                      |              |
|----------------------|--------------|
| ChiI_S._coelicolor   | GGAMIWELAGD. |
| NP_902986_C._violace | GGVMFWELAGD. |
| ZP_01159608_Photobac | GGIMFWELAGD. |
| ZP_01234708_V._angus | GGIMFWELAGD. |
| NP_233087_V._cholera | GGIMFWELAGD. |
| NP_230718_V._cholera | GGMMIWEMAGD. |
| AAO07185_V._vulnific | GGIMFWELAGD. |
| ZP_01354150_C._phyto | GGMMYWEQTQD. |
| ZP_01246933_F._johns | GGIMFWELTLD. |
| YP_012734_L._monocyt | GGMISWMQSQD. |
| YP_529337.1_A_S._deg | GGAMFWHLGQD. |
| ChiA_A_P._kodakarae  | GGVMIWEITAD. |
| AAG19274_Halobacteri | GGMMFWTFSGD. |
| AAG19275_Halobacteri | GGVMIWELSQD. |
| CE03543_C._elegans   | GGVWIWSVDMG. |
| CE34961_C._elegans   | GGVWIHLVDKD. |
| CE20043_C._elegans   | GGVWIWHVDAN. |
| CE15845_A_C._elegans | GGVWIWTVDMG. |
| CE32863_A_C._elegans | GGVWIWTVDMG. |
| CE03544_C._elegans   | GGVWIWSVDMG. |
| CE08731_C._elegans   | GGVWIWTEHED. |
| CE28638_C._elegans   | GGVWIWSVDMG. |
| CE32863_B_C._elegans | GGVCLWAVDMG. |
| CE01673_C._elegans   | GGVSIWSRDMG. |
| CE02993_C._elegans   | GGITMWTIDQD. |
| CE02996_C._elegans   | GGITMWTIDQD. |
| CE02995_C._elegans   | GGITMWTIDQD. |
| CE02992_C._elegans   | GGVLIWNVDQD. |
| CE02999_C._elegans   | GGVAMYTIDDD. |
| CE02998_C._elegans   | GGVYIWAIGAD. |
| CE09229_C._elegans   | GGVMIWALDLD. |
| CE12928_C._elegans   | GGVMIWALDLD. |
| CE23907_C._elegans   | GGVWIWSVDMG. |
| CE32917_C._elegans   | AGVWIWFVDLD. |
| CE34579_C._elegans   | GGVWIWQMDMG. |
| CE25073_C._elegans   | GGVWIWAVDMG. |
| CE03548_C._elegans   | GGVWIWGVDMG. |
| NP_469498_L._innocua | GGMISWMQSQD. |
| CE08730_C._elegans   | GGVWIWLMEND. |
| Q8U1H4_P._furiosus   | .....        |
| CE12474_C._elegans   | GGVWLWSVDMG. |
| CE02990_C._elegans   | GGITMWTIDQD. |
| CE40270_C._elegans   | GGICIWTVDKD. |
| CE40296_C._elegans   | GGITMWTIDQD. |
| ChiB_S._marcescens   | GGVMFWHLGQD. |
| O10363_O._pseudotsug | GGVFAWEIDAD. |
| AAP29899_C._fumifera | GGVFAWEIDAD. |
| AAV73807_B._mori_NPV | GGVFAWEIDAD. |
| AAL56186_H._zea_SNPV | GGVFAWEIDAD. |
| AAF33549_S._exigua_N | AGVFAWEIDAD. |
| AAZ38189_A._segetum  | AGVFAWEIDAD. |
| AAS82706_A._segetum  | GGVFAWEIDAD. |
| ZP_01159013_Photobac | AGVFSWEIDAD. |
| ZP_01161077_Photobac | GGVFSWEIDSD. |
| ZP_01159325_Photobac | AGVFWDLSDG.  |
| ZP_01160869_Photobac | GGVFGWEATSD. |
| ZP_01233025_V._angus | AGVFSWEIDAD. |
| ZP_01236284_V._angus | GGVFSWEIDSD. |
| ZP_01235109_V._angus | AGVFWDLSDG.  |
| ZP_01235465_V._angus | GGVFGWEATSD. |
| AAO08114_V._vulnific | AGVFSWEIDAD. |
| AAO07498_V._vulnific | GGVFWELSDG.  |



|                      |               |
|----------------------|---------------|
| NP_232428_V._cholera | AGLFSWEIDAD.  |
| YP_432951_H._chejuen | AGVFFWMAEQD.  |
| YP_529337.1_B.S._deg | AGMLTWEIDGD.  |
| YP_435912_H._chejuen | AGIFTWEVDAD.  |
| ZP_01137509_A._cellu | GGVMMFSLYDL   |
| ChiE_S._coelicolor   | LGGFVWEMSGD.  |
| ChiC_S._coelicolor   | GGAFFWEFSGD.  |
| ChiD_S._coelicolor   | GGTFFWELSGD.  |
| NP_903910_C._violace | GGVFSWSLDGD.  |
| YP_529072.1_S._degra | GGAFFWEELSGD. |
| ZP_01431615_S._tropi | GGAFFWEELSGD. |
| ZP_01136287_A._cellu | GGTAAWSLDGD.  |
| 01315.1_C._cinereus  | RGFATWEAGGD.  |
| 03252.1_C._cinereus  | GGFAMWEAGGD.  |
| 05285.1_C._cinereus  | AGFAVWHISGD.  |
| 05291.1_C._cinereus  | KGFaiWHIGD.   |
| 01586.1_C._cinereus  | AGCFSWSLDQD.  |
| 128098_P._chrysospor | RGFAIWEAAGD.  |
| 39872_P._chrysospori | RGFNIWEAGGD.  |
| 138098_P._chrysospor | LGfAMWEAAGD.  |
| 129436_P._chrysospor | RGVNMFDahGD.  |
| EAA71245_G._zeae     | GGFATYEAGGD.  |
| MGG_04732_M._grisea  | AGFSVWEELGGD. |
| UM06190_U._maydis    | AGISMWSLDGD.  |
| 04245_F._neoformans  | RGcNVFSVDGD.  |
| 16170_R._oryzae      | AGFMIWSLEMD.  |
| 01334_R._oryzae      | AGFMIWSLEMD.  |
| 13934_R._oryzae      | GGVMLWSLEMD.  |
| 07611_R._oryzae      | AGLFAWSVDED.  |
| 10252_R._oryzae      | AGVMGYPSR...  |
| 14659_R._oryzae      | AGVMVWAINQD.  |
| 231399_L._bicolor    | RGFAMWEVGSD.  |
| 180319_L._bicolor    | KGFAMWHAAGD.  |
| 191848_L._bicolor    | LGfAMWHVVGd.  |
| 317003_L._bicolor    | AGCFTWSLDQD.  |
| 246840_L._bicolor    | RGFSMWEAGGD.  |
| 144643_L._bicolor    | LGtNMFDICGD.  |
| 310136_L._bicolor    | LGFAVWPVTGD.  |
| 629882_M._xanthus    | GGTIIWTINQG.  |
| 630509_A_M._xanthus  | .....         |
| YP_592598_Acidobacte | GGMFMWDLSDG.  |
| YP_446903_S._ruber   | GGVMYWEHSAD.  |
| ZP_00739282_B._thuri | SGAMFWELSGD.  |
| ZP_01245639_F._johns | AGGMIWEELSQD. |
| NP_976824_B._cereus  | SGAMFWELSGD.  |
| YP_077581_B._licheni | SGAMFWDFSGD.  |
| 631138_M._xanthus    | GGAMFWELSGD.  |
| ZP_01247029_F._johns | GGVMIWEELSQD. |
| ZP_01234549_V._angus | GGVMLWEELPCD. |
| ZP_01160697_Photobac | GGVMLWEELPCD. |
| ZP_01158584_Photobac | GGVMLWEELPCD. |
| AN0549_E._nidulans   | GGVMVWAVSHD.  |
| AN8481_E._nidulans   | GGVMVWAVSHD.  |
| AN9390_E._nidulans   | GGVMVWAASD.   |
| AN0517_E._nidulans   | SGWMVWAIDQD.  |
| AN0541_E._nidulans   | GGVMIWAIDQD.  |
| AN5077_E._nidulans   | SGLMIWAIDL.   |
| AN0509_E._nidulans   | GGSVNWATDLE.  |
| AN7613_E._nidulans   | AGFANWAVDLT.  |
| 07035_N._crassa      | PGVMVWAMSQD.  |
| 07484_N._crassa      | GGTSNWATDLE.  |
| 05317_N._crassa      | GGTTDWASDLQ.  |

|                      |              |
|----------------------|--------------|
| EAA74768_G._zeae     | GGVMVWAITHD. |
| EAA78168_G._zeae     | SGVLVWAVDYD. |
| EAA75711_G._zeae     | GGTMVWSIDFQ. |
| EAA68447_G._zeae     | GGTTDWAVDLQ. |
| EAA77156_G._zeae     | GGVVDWAVDLE. |
| 12510_S._sclerotioru | GGLMVWAISHD. |
| 00773_S._sclerotioru | GGVLVWSVDYD. |
| 05454_S._sclerotioru | GGLLIWAVDLQ. |
| 00677_S._sclerotioru | GGTVVWSIDLQ. |
| 02128_S._sclerotioru | GGTADWAVDLQ. |
| MGG_04534_M._grisea  | GGTMVWAIDLQ. |
| MGG_01336_M._grisea  | GGTMVWATDFT. |
| 14527_P._nodorum     | GGTMVWAMDQV. |
| 15411_P._nodorum     | GGIMIWSIDFD. |
| 02214_P._nodorum     | GGTALWAIDYD. |
| 04761_C._immitis     | GGYLIWAIDQD. |
| 04323_A._capsulatum  | GGTFAWAIDLQ. |
| 00533_B._fuckeliana  | GGTVVWSIDLQ. |
| Chi18_1_H._jecorina  | LGIADWAVDLL. |
| Chi18_8_H._jecorina  | AGSSDWAILDE. |
| Chi18_9_H._jecorina  | LGTVDWAVDLQ. |
| Chi18_10_H._jecorina | GGISNWAIDLE. |
| 02650_A._capsulatum  | GGAFAWGLGED. |
| AN0221_E._nidulans   | GGVFAWGLGED. |
| 06020_N._crassa      | GGVFAWGLGED. |
| EAA76014_G._zeae     | GGVFAWGLGED. |
| Chi18_4_H._jecorina  | GGVFAWGLGED. |
| 09277_P._nodorum     | EGAFAWGLGED. |
| 05838_A._capsulatum  | .....        |
| EAA69039_G._zeae     | KSVMAWALALD. |
| MGG_06594_M._grisea  | GGGYAWTLGED. |
| Chi18_11_H._jecorina | GGVFAWSLAQD. |
| 02644_A_P._nodorum   | GGVMAWSLGED. |
| AN9447_E._nidulans   | GGVMAWSLGED. |
