# Supplementary material
Source: publisher figshare collection journal article supplement (https://karger.figshare.com/articles/dataset/_/5120446)
Supplement: Supplementary file 2 [file 1]

Figure S2. Amino-acid alignment of cluster B GH18 catalytic domains.

|                      | 10                                                                      | 20    | 30    | 40        | 50     | 60     |
|----------------------|-------------------------------------------------------------------------|-------|-------|-----------|--------|--------|
|                      | ..... ..... ..... ..... ..... ..... ..... ..... ..... ..... ..... ..... |       |       |           |        |        |
| 05455_B._fuckeliana  | .....                                                                   | ..... | ..... | DITTCQKTY | .....G | .....K |
| 14944_B._fuckeliana  | .....                                                                   | ..... | ..... | DIVTCQGL  | .....G | .....K |
| 13155_S._sclerotioru | .....                                                                   | ..... | ..... | GIPYCQ.SL | .....G | .....K |
| 08695_S._sclerotioru | .....                                                                   | ..... | ..... | DIVTCQGM  | .....G | .....K |
| 11212_S._sclerotioru | .....                                                                   | ..... | ..... | DITTCQQTY | .....N | .....K |
| EAA72615_G._zeae     | .....                                                                   | ..... | ..... | GIPYCK.DR | .....G | .....V |
| 02184_N._crassa      | .....                                                                   | ..... | ..... | DIKHCQ.EK | .....G | .....K |
| 04500_N._crassa      | .....                                                                   | ..... | ..... | DIKTCQSL  | .....G | .....K |
| MGG_03599_M._grisea  | .....                                                                   | ..... | ..... | QIEQCQRIF | .....R | .....K |
| MGG_01333_M._grisea  | .....                                                                   | ..... | ..... | DINTCHSL  | .....N | .....K |
| 16099_R._oryzae      | .....                                                                   | ..... | ..... | DIKFCQDN  | .....G | .....K |
| 10112_R._oryzae      | .....                                                                   | ..... | ..... | DIKTCQKK  | .....G | .....K |
| 04523_R._oryzae      | .....                                                                   | ..... | ..... | DIKTCQSN  | .....G | .....V |
| 11152_R._oryzae      | .....                                                                   | ..... | ..... | DIKTCQAK  | .....G | .....V |
| 08153_R._oryzae      | .....                                                                   | ..... | ..... | DIKYCQSK  | .....G | .....K |
| NP_594130_S._pombe   | .....                                                                   | ..... | ..... | DIQVCQEN  | .....G | .....I |
| 00864_P._nodorum     | .....                                                                   | ..... | ..... | GIAVCR.KN | .....N | .....K |
| 08680_P._nodorum     | .....                                                                   | ..... | ..... | DIKTCQTTN | .....Q | .....K |
| AN8241_E._nidulans   | .....                                                                   | ..... | ..... | DIPKCQ.AA | .....G | .....K |
| AN8217_E._nidulans   | .....                                                                   | ..... | ..... | DITKCQAA  | .....G | .....K |
| Chi18_14_H._jecorina | .....                                                                   | ..... | ..... | AITKCK.TA | .....G | .....V |
| Chi18_16_H._jecorina | .....                                                                   | ..... | ..... | SIATCQ.AA | .....G | .....I |
| Chi18_12_H._jecorina | .....                                                                   | ..... | ..... | DIKTCQAN  | .....G | .....K |
| Chi18_17_H._jecorina | .....                                                                   | ..... | ..... | DIIECQQTY | .....G | .....K |
| Chi18_13_H._jecorina | .....                                                                   | ..... | ..... | AIQACQAA  | .....G | .....K |
| 04407.1_C._cinereus  | .....                                                                   | ..... | ..... | DIASCQSK  | .....G | .....K |
| 6412_P._chrysosporiu | .....                                                                   | ..... | ..... | DIKTCQAK  | .....G | .....K |
| 2991_P._chrysosporiu | .....                                                                   | ..... | ..... | AIQTCQSK  | .....G | .....K |
| 40899_P._chrysospori | .....                                                                   | ..... | ..... | DIKFCQSK  | .....G | .....K |
| BAA21861.1_A._thalia | .....                                                                   | ..... | ..... | QVKDCQSR  | .....G | .....I |
| 07348_C._immitis     | .....                                                                   | ..... | ..... | DITKCQGK  | .....G | .....K |
| XP_452410_K._lactis  | .....                                                                   | ..... | ..... | DIESCQAK  | .....G | .....K |
| CTS1_S._cerevisiae   | .....                                                                   | ..... | ..... | DIETCQSL  | .....G | .....K |
| CHT1_C._albicans     | .....                                                                   | ..... | ..... | DIKSCQQQ  | .....G | .....K |
| CHT3_C._albicans     | .....                                                                   | ..... | ..... | DIKYCQNK  | .....G | .....K |
| CHT2_C._albicans     | .....                                                                   | ..... | ..... | DIKTCQSL  | .....G | .....K |
| 05283_L._elongisporu | .....                                                                   | ..... | ..... | DIKYCQQQ  | .....G | .....K |
| 03890_L._elongisporu | .....                                                                   | ..... | ..... | DIKGCQAA  | .....G | .....K |
| 301747_L._bicolor    | .....                                                                   | ..... | ..... | DITSCQAK  | .....G | .....K |
| CAC07216_M._anisopli | .....                                                                   | ..... | ..... | AIQTCQ.SA | .....G | .....V |
| Chit30_M._anisopliae | .....                                                                   | ..... | ..... | SIKNCQSK  | .....G | .....K |
| AAG25709_M._domestic | .....                                                                   | ..... | ..... | EIKSCQAK  | .....G | .....I |
| ABA26457_C._lanatus  | .....                                                                   | ..... | ..... | EINSCQSL  | .....G | .....I |
| CAJ43737_C._arabica  | .....                                                                   | ..... | ..... | QIEVCQSL  | .....G | .....I |
| ConcanavalinB_C._ens | .....                                                                   | ..... | ..... | QIEECQRM  | .....G | .....V |
| Hevamine_H._brasili  | .....                                                                   | ..... | ..... | GIRSCQIQ  | .....G | .....I |
| Q8L5C6_T._aestivum   | .....                                                                   | ..... | ..... | DIKHCQSK  | .....G | .....V |
| Q53NL5_O._sativa     | .....                                                                   | ..... | ..... | DIKHCQSR  | .....G | .....I |
| Chi18_19_H._jecorina | .....                                                                   | ..... | ..... | ELRILQAS  | .....G | .....  |
| Chi18_20_H._jecorina | .....                                                                   | ..... | ..... | TITMKQA   | .....G | .....  |
| 01393_N._crassa_B    | .....                                                                   | ..... | ..... | ELRILQAS  | .....G | .....  |
| 08394_N._crassa_B    | .....                                                                   | ..... | ..... | ETQILGYA  | .....G | .....  |
| XP_386145_G._zeae_B  | .....                                                                   | ..... | ..... | ELRILQAS  | .....G | .....  |
| XP_382346_G._zeae_B  | .....                                                                   | ..... | ..... | EVKQLQAA  | .....G | .....  |
| MGG_04073_M._grisea  | .....                                                                   | ..... | ..... | EMRILQAS  | .....G | .....  |
| MGG_01876_M._grisea  | .....                                                                   | ..... | ..... | EAAVLRGS  | .....G | .....  |
| 01513_S._sclerotioru | .....                                                                   | ..... | ..... | ELRILQAT  | .....G | .....  |
| 03420_S._sclerotioru | .....                                                                   | ..... | ..... | QVKTLQSA  | .....G | .....  |

05559\_B.\_fuckeliana .....ELRLIQAS.....G.....  
 07854\_B.\_fuckeliana .....QVKALQSA.....  
 06595\_C.\_immitis\_B .....EMRVMQAS.....G.....  
 AN8245\_E.\_nidulans\_B .....EVSILQES.....G.....  
 236861\_L.\_bicolor\_B .....DVAQMQUES.....G.....  
 185397\_L.\_bicolor\_B .....DVAQMOKS.....G.....  
 UM02758\_U.\_maydis\_B .....FKSRYAGA.....G.....  
 02351\_F.\_neoformans .....IIEAYHDA.....G.....  
 Chi18\_18\_H.\_jecorina .....DIPYCR.SK.....G.....V  
 ZP\_01159542\_Photobac HNLIGYWVN.FV...NGSGC.....PIRLRDIS.PAWDIIIDIAFADND.RNSDG.....  
 ZP\_01234779\_V.\_angus HNLIGYWVN.FV...NGSGC.....PIRLRDIS.PAWDIIIDIAFADND.RNSDG.....  
 NP\_231586\_V.\_cholera HRLIGYWVN.FV...NGAGC.....PIRLADMS.QAWDVIDIAFAEND.RNSTG.....  
 AAO10239\_V.\_vulnific HKLIGYWVN.FV...NGAGC.....PIRLADMS.NAWDVIDIAFAEND.RNSNG.....  
 NP\_902605\_C.\_violace HALVGWYWN.FA...NPSGS.....AFPLSQVS.ADWDVIVVAFADDA.GN..G.....  
 NP\_980050\_B.\_cereus KLLVGWYWN.FD...NGTG.....IIKL RDVS.PKWDVINVSFGETG.GDRS.....  
 634143\_M.\_xanthus KIIVGYWVN.FD...NGST.....NIRLRDVS.AKFNVIQVAFAPVGGPGSG.....  
 ChiA\_S.\_coelicolor HAVTGYWQN.FN...NGAT.....VQKISDVP.SAYDIIAVAFADAT..TTPG.....  
 YP\_527176.1\_S.\_degra HSLVGWYWN.FV...NGAGC.....PMRLSEMS.DKWDVIDIAFADND.PASNG.....  
 YP\_436543\_B\_H.\_cheju HALIGYLHASEFA...NGSG.....YVRMADVS.NDWDVINLSFAEPT.SPTSG.....  
 ChiB\_S.\_coelicolor HALVGYLHASEFA...NGSG.....YTRMADVP.DSWDVIDLAFGEPT.SVTSG.....  
 YP\_432187\_H.\_chejuen RVIVGYWVN.FD...NGSG.....FVRLPDVS.PDWDVIDVAFATPKLGSHS.....  
 ZP\_01353924\_C.\_phyto HILTGYWQN.FD...NGAK.....CLKISDVP.QSYNIIAIAFAEAT..TTAG.....  
 ZP\_00742457\_B.\_thuri KLLVGWYWN.FD...NGTG.....IIKL RDVS.PKWDVINVSFGETG.GDRS.....  
 ZP\_01430879\_S.\_tropi HILTGYWVN.FD...NPAV.....ELRLRDVP.AEYDVVAVAFAEAT..TTPG.....  
 ChiJ\_S.\_coelicolor KVLQGYWEN.WDGAANGVHPPFGWTPITDPQIGAHGYNVLNAAFPVIL..S.DG.....  
 Chi18\_15\_H.\_jecorina KVLQGYWEN.WDGASNGVHPPFGWTPINENPQIQHGYNVINAAFPVIL..P.DG.....  
 YP\_349297\_P.\_fluores KIILMGFWHNPAGPSDGYQRGQFA.NIALENVP.KEYNVVAVAFMKGS.....G.....  
 NP\_719615\_S.\_oneiden GVVVGWYWNWCGG...AGYKGGVAP.CVSLAQVN.PQYNVVDISFMKVY.....G.ATG.S  
 ZP\_01236292\_V.\_angus GVVVGWYWNWADG...QGYKMGNA.PAMS LK DIN.PMYNVVDVSFMKVY.....DVAEG.R  
 ChiC\_S.\_marcescens KIILMGFWHNPAGASDGYQGGQFA.NMNLTDIP.AEYNVAVAFMKGQ.....G.....  
 YP\_237842\_P.\_syringa NIILMGFWHNPWSESQGYQGGMFA.EMPLTGID.KAYNVIAVAFMKGA.....G.....  
 YP\_608169\_P.\_entomop KIILMGWYWNWAGPADGYQRGQFA.NMSLEDVP.RDYNVAVAFMKGS.....G.....  
 NP\_814153\_E.\_faecali KVLVGWYWNWASKGRDGYKQGTSA.SLNLSEVN.QAYNVVPVSFMKSD.....GTTR...  
 YP\_014504\_L.\_monocyt QVLVGWYHWSKSSGNDGYQGGTSA.DIALKDT.P.KAYNVVDVSFMKGD.....GVNR...  
 YP\_071855\_Y.\_pseudot KIFMGFWHNTSYYPANGYKDGQST.NIPLADIP.KEFNVIAVAFMKGS.....G.....  
 YP\_053588\_M.\_florum KTLVGWYHYDWG.....GNFENKIA.LNDKDLLT.SSYNVINLSFLYST.....VEYQ...  
 NP\_471330\_L.\_innocua QVLVGWYHWSKSSGKDGQGGTSA.DIALKDT.P.KAYNVVDVSFMKGD.....GVNR...  
 ZP\_01245639\_B\_F.\_joh KIILGYAHS.WE...NAGAP.....FLYFSQMVGSKFNVVDYSFVETVNRDGYT.....

|                      | 70                                                                      | 80             | 90           | 100        | 110                | 120 |
|----------------------|-------------------------------------------------------------------------|----------------|--------------|------------|--------------------|-----|
| 05455_B._fuckeliana  | ..... ..... ..... ..... ..... ..... ..... ..... ..... ..... ..... ..... | TIMLSVGG.....  | ATYT.....    | EGG.....   | FTSTQAATTAAN.....  |     |
| 14944_B._fuckeliana  |                                                                         | TILLSIGG.....  | ATYT.....    | ENE.....   | LASADAATTAAK.....  |     |
| 13155_S._sclerotioru |                                                                         | KILLSLGG.....  | ASN.....     | TYQ.....   | LTGVADGEYFAD.....  |     |
| 08695_S._sclerotioru |                                                                         | TILLSIGG.....  | ATYS.....    | DSE.....   | LKTSDEATTAAK.....  |     |
| 11212_S._sclerotioru |                                                                         | TILLSVGG.....  | ATYT.....    | EGG.....   | FTSTAAAITAAN.....  |     |
| EAA72615_G._zeae     |                                                                         | KILLSIGG.....  | VYSDEGS..... | NYK.....   | VTTDDKGRDFAD.....  |     |
| 02184_N._crassa      |                                                                         | KVLLSLDG.....  | VEH.MGS..... | RFS.....   | LSSEAKAEFAS.....   |     |
| 04500_N._crassa      |                                                                         | SILLSIGG.....  | ATYS.....    | EGG.....   | FSSPAEAI SWAD..... |     |
| MGG_03599_M._grisea  |                                                                         | KILLSLGG.....  | GVA.....     | GYQ.....   | LTGADAGRAFAD.....  |     |
| MGG_01333_M._grisea  |                                                                         | TILLSVGG.....  | ATYS.....    | EGG.....   | FPNVEAANKAAD.....  |     |
| 16099_R._oryzae      |                                                                         | KVLLSLGG.....  | ATP.....     | EYG.....   | LNSYEEGESLAD.....  |     |
| 10112_R._oryzae      |                                                                         | TILLSLGG.....  | AAG.....     | AYG.....   | FANDKDAVAFAD.....  |     |
| 04523_R._oryzae      |                                                                         | KVLLSLGG.....  | AAG.....     | SYG.....   | FSSDSEGQTFAE.....  |     |
| 11152_R._oryzae      |                                                                         | KILLSLGG.....  | ATG.....     | AYG.....   | FTSDAEGQQFAE.....  |     |
| 08153_R._oryzae      |                                                                         | LVTLSLGG.....  | ATG.....     | GVG.....   | FQSDSQATSFAD.....  |     |
| NP_594130_S._pombe   |                                                                         | KVLLSIGG.....  | YNG.....     | NFS.....   | LNNDDDGTNF AF..... |     |
| 00864_P._nodorum     |                                                                         | KVLLSLGG.....  | GLP.....     | T.NYY..... | LPDEKTTTWF AK..... |     |
| 08680_P._nodorum     |                                                                         | TILLSFGGA..... | ETAA.....    | DKG.....   | YASDDEAKAGAK.....  |     |
| AN8241_E._nidulans   |                                                                         | KVFLSLGG.....  | ATP.....     | TYW.....   | FDTIDASTKLAD.....  |     |
| AN8217_E._nidulans   |                                                                         | TILLSIGG.....  | ATYS.....    | EGG.....   | FDSATAANAGAD.....  |     |
| Chi18_14_H._jecorina |                                                                         | KIILSLGG.....  | ASA.....     | FSS.....   | FQTADQAAQAGQ.....  |     |

|                      |                                                        |
|----------------------|--------------------------------------------------------|
| Chi18_16_H._jecorina | KVIISLGG.....AAS.....SYS.....LQSQSQAVALGQ.....         |
| Chi18_12_H._jecorina | TILLSLGG.....DTYS.....QGG.....WASPEAAQDAAA.....        |
| Chi18_17_H._jecorina | TIMMSLFG.....STYS.....ESG.....FSSSSAAVAAAQ.....        |
| Chi18_13_H._jecorina | LVILSMGG.....AVDFS.....AVT.....LSSDAQGQQLAD.....       |
| 04407.1_C._cinereus  | IVTSLSLGG.....ATG.....AVG.....FESDSQAVSFAQ.....        |
| 6412_P._chrysosporiu | IVTSLSLGG.....ATG.....SVG.....FTGDSQAESFAD.....        |
| 2991_P._chrysosporiu | IVTISLGG.....ATG.....AAG.....FTSDAQASQFAN.....         |
| 40899_P._chrysospori | AITLSLGG.....ATG.....QIG.....FSSDSQAQTFAT.....         |
| BAA21861.1_A._thalia | KVMLSLGGG.....IG.....NYS.....IGSREDAKVIAD.....         |
| 07348_C._immitis     | TIILSIGG.....ATYS.....EGG.....FGSEEEAIALGAN.....       |
| XP_452410_K._lactis  | KVFLSLGG.....AIG.....SYG.....FTDDSQAEEFAT.....         |
| CTS1_S._cerevisiae   | KVLLSLGG.....ASG.....SYL.....FSDDSQAETFAQ.....         |
| CHT1_C._albicans     | TILLSLGG.....ATG.....NYG.....FSSDSEAVQFAG.....         |
| CHT3_C._albicans     | TILLSLGG.....AAG.....SYG.....FSDDATAKQFAH.....         |
| CHT2_C._albicans     | TVLLSLGG.....GVG.....DYG.....FSDVASATKFAD.....         |
| 05283_L._elongisporu | IVLLSLGG.....ASG.....SYG.....LSSDDVAREFAH.....         |
| 03890_L._elongisporu | KVILSLGG.....AAG.....NYG.....FTDGQEATDYAE.....         |
| 301747_L._bicolor    | IITLSLGG.....AEG.....SFG.....FQSSSQATAFAH.....         |
| CAC07216_M._anisopli | KIILSLGG.....ATS.....SYS.....LQTQAQAEQIGQ.....         |
| Chit30_M._anisopliae | PVILSMGG.....ATDYS.....DVQ.....LNSDAQGQQIAN.....       |
| AAG25709_M._domestic | KVILSIGGA.....SG.....SYS.....LTSADDARQVAT.....         |
| ABA26457_C._lanatus  | KVLLSIGGG.....AG.....SYS.....LSSAEDARDVAN.....         |
| CAJ43737_C._arabica  | KVLLSLGGG.....GAG.....AGRGPI.....LASPEDARGVAA.....     |
| ConcanavalinB_C._ens | KVFLALGGP.....KG.....TYS.....ACSADYAKDLAE.....         |
| Hevamine_H._brasilie | KVMLSLGGG.....IG.....SYT.....LASQADAKNVAD.....         |
| Q8L5C6_T._aestivum   | PVSLSIGGY.....GT.....GYS.....LPSNRSALDLFD.....         |
| Q53NL5_O._sativa     | TVLLSIGGQ.....GG.....AYS.....LPTNASAADVAD.....         |
| Chi18_19_H._jecorina | VKVLAM.....LGGG.AKGS.....                              |
| Chi18_20_H._jecorina | VKVMGM.....VGGA.APGS.....                              |
| 01393_N._crassa_B    | IKVLGM.....LGGG.AKGS.....                              |
| 08394_N._crassa_B    | VKIMGM.....IGGA.AAGS.....                              |
| XP_386145_G._zeae_B  | VKVMGM.....LGGG.CKGS.....                              |
| XP_382346_G._zeae_B  | IKVLGM.....LGGG.AQGS.....                              |
| MGG_04073_M._grisea  | VKILGM.....LGGH.ARGs.....                              |
| MGG_01876_M._grisea  | VRVMAM.....VGGA.AEGS.....                              |
| 01513_S._sclerotioru | IKVMGM.....LGGG.AKGS.....                              |
| 03420_S._sclerotioru | IRVSCM.....MGGA.AWGT.....                              |
| 05559_B._fuckeliana  | IKVMGM.....LGGG.AKGS.....                              |
| 07854_B._fuckeliana  | .....G.....                                            |
| 06595_C._immitis_B   | TKVMGM.....LGGG.AKGS.....                              |
| AN8245_E._nidulans_B | IKVMGM.....LGGG.APGT.....                              |
| 236861_L._bicolor_B  | VKVMGM.....LGGG.AAGS.....                              |
| 185397_L._bicolor_B  | VKVMGM.....LGGG.GTGS.....                              |
| UM02758_U._maydis_B  | MKLMVS.....VFGA.TDTP.....                              |
| 02351_F._neoformans  | IAIMIA.....AFGS.TDQP.....                              |
| Chi18_18_H._jecorina | KVILSIGG.....VYNALTS..NYF.....VGDNGTATDFAT.....        |
| ZP_01159542_Photobac | TVHFNLYNGDIRSSCEPLNPQ.....QFK.....DDVRELRAQKG.....     |
| ZP_01234779_V._angus | TVHFNLYNGDIRSSCEPLDPQ.....QFK.....DDVRELRAQKG.....     |
| NP_231586_V._cholera | TVHFNLYAGDIYSSCAPLDPA.....QFK.....QDMKALQAKGK.....     |
| AAO10239_V._vulnific | TVHFNLYSGDIYSSCAPLDPL.....QFK.....QDMAALQAKGK.....     |
| NP_902605_C._violace | NVSFTLDP.....AAGS.AA.....QFI.....QDIRAQQAKGK.....      |
| NP_980050_B._cereus  | TVEFS.....PVYGTDA.....EFK.....SDISYLKSKGK.....         |
| 634143_M._xanthus    | RMAFT.....PYNASVA.....DFK.....ADIALLLKSQGR.....        |
| ChiA_S._coelicolor   | AVTFNLDS.....AGLGGYTV.....QFK.....ADVRAKQAAGK.....     |
| YP_527176.1_S._degra | TVHFNLFPG.....TGNCAPAMNAE.....QFK.....ADMRLAQAKGK..... |
| YP_436543_B_H._cheju | EVEFHLCP..VSECANVESEA.....DFK.....AAIRAKQAAGK.....     |
| ChiB_S._coelicolor   | DIRFERCP..VAECPNVESDA.....EFK.....AAIKAKQAAGK.....     |
| YP_432187_H._chejuen | DMEFS.....PFQITPA.....QMK.....ADIAAVQARGQ.....         |
| ZP_01353924_C._phyto | EVTFKLDSN.LASKLGGYTEQ.....QFI.....NDIAAAKAKGQ.....     |
| ZP_00742457_B._thuri | TVEFS.....PVYGTDA.....EFK.....SDISYLKSKGK.....         |
| ZP_01430879_S._tropi | EVTFAVDPG.LSASLGGYTDPA.....DFA.....ADVRTLKGQGR.....    |
| ChiJ_S._coelicolor   | TALWEDG.....MDRGVKV.....ATP.....AEMCAAKASGQ.....       |

Chi18\_15\_H.\_jecorina TALWQDG.....MDATVKV.....ATP.....AEMCQAKAAGA.....  
 YP\_349297\_P.\_fluores IPTFKP.....FNVSDA.....EFR.....RQVGVLNSQGR.....  
 NP\_719615\_S.\_oneiden IPTFKLDPA.....VGLSEA.....QFI.....DQIGELNRQGR.....  
 ZP\_01236292\_V.\_angus IPTFHLDAE.....TGLTEQ.....QFI.....DQIKELNDQGR.....  
 ChiC\_S.\_marcescens IPTFKP.....YNLSDA.....EFR.....RQVGVLNSQGR.....  
 YP\_237842\_P.\_syringa IPTFKP.....YNLSDE.....AFR.....AQVAELNAQGR.....  
 YP\_608169\_P.\_entomop IPTFKP.....YNLSDA.....EFR.....RQVGVLNSQGR.....  
 NP\_814153\_E.\_faecali IPTFKP.....YNQTDI.....AFR.....QEVAQLNSQGR.....  
 YP\_014504\_L.\_monocyt IPTFKP.....VGINDS.....DFR.....AQVGALNKEGR.....  
 YP\_071855\_Y.\_pseudot IPTFRP.....YNGSDE.....QFR.....TQVDKLHSEGR.....  
 YP\_053588\_M.\_florum MPTYSP.....NN..PA.....AIK.....EGVKALQSQGK.....  
 NP\_471330\_L.\_innocua IPTFKP.....VGINDS.....DFR.....AQVGALNKEGR.....  
 ZP\_01245639\_B\_F.\_joh PILTTNDTR..YLTNGVFNKQ.....LLK.....NDIKSLRDSGV.....

|                      | 130   | 140                  | 150                     | 160             | 170     | 180 |
|----------------------|-------|----------------------|-------------------------|-----------------|---------|-----|
| 05455_B._fuckeliana  | ..... | NLWSWFGP..DTS.....   | G.....                  | DIRPFG.....     | SAVID   |     |
| 14944_B._fuckeliana  | ..... | NVWAAFPG..KTS.....   | SS.....                 | TTRPFG.....     | DAVVD   |     |
| 13155_S._sclerotioru | ..... | FLWGSYGP..FKQS.....  | WLDN..GGIRPMDGGYYGTDP.. | NIHIDID         |         |     |
| 08695_S._sclerotioru | ..... | NVWAAFPG..KTS.....   | SS.....                 | TTRPFG.....     | DAVVD   |     |
| 11212_S._sclerotioru | ..... | NIWSWFGP..YSS.....   | G.....                  | VVRPFG.....     | TAVVD   |     |
| EAA72615_G._zeae     | ..... | FLYKSFGP..HNEH.....  | SNP.....                | IRPFDSIDNDGN..  | TVHAAVD |     |
| 02184_N._crassa      | ..... | FLWGAFGP..YDAK.....  | WTG.....                | PRPFDFAGHR..... | VSVD    |     |
| 04500_N._crassa      | ..... | RLWAMFGP..VSN.....   | SD.....                 | KRPFG.....      | TAVID   |     |
| MGG_03599_M._grisea  | ..... | QLWAFI GP..RPDG..... | STL.....                | PRPFDGESR.....  | VADLD   |     |
| MGG_01333_M._grisea  | ..... | NLWAMFGPPPAAST.....  | NDAATVNRPF.....         | TAYID           |         |     |
| 16099_R._oryzae      | ..... | ELWYTFGG..GSD.....   | TN.....                 | TFRPFG.....     | NASVD   |     |
| 10112_R._oryzae      | ..... | TLWATFGG..GKS.....   | ER.....                 | RPFG.....       | DAVVD   |     |
| 04523_R._oryzae      | ..... | TIWNLFGG..GTS.....   | DT.....                 | RPFD.....       | DAVID   |     |
| 11152_R._oryzae      | ..... | TLWNLFGR..GSS.....   | ET.....                 | RPFG.....       | DAIID   |     |
| 08153_R._oryzae      | ..... | TIWNLFGL..GES.....   | SI.....                 | RPFG.....       | DAILD   |     |
| NP_594130_S._pombe   | ..... | QVWNIFGS..GED.....   | SY.....                 | RPFG.....       | KAVVD   |     |
| 00864_P._nodorum     | ..... | FLVGAFGP..KQDG.....  | WTG.....                | PRPIG.....      | DEFVD   |     |
| 08680_P._nodorum     | ..... | KIWEFGP..KTA.....    | AS.....                 | SIRPFD.....     | DAVVD   |     |
| AN8241_E._nidulans   | ..... | FLWGAFGP..VTDA.....  | WTVA..DKPRPF.....       | NAVVD           |         |     |
| AN8217_E._nidulans   | ..... | LLWATFGP..DQN.....   | DT.....                 | KIHRPF.....     | SAVID   |     |
| Chi18_14_H._jecorina | ..... | YLWNAYG..GGS.....    | GVT.....                | RPLG.....       | NNVMD   |     |
| Chi18_16_H._jecorina | ..... | YLWNAYGN..SGNT.....  | TVQ.....                | RPFG.....       | NVFN    |     |
| Chi18_12_H._jecorina | ..... | QVWAMFGP..VQS.....   | DS.....                 | SAPRPF.....     | DAVVD   |     |
| Chi18_17_H._jecorina | ..... | EIWAMYGP..VQS.....   | GN.....                 | STPRPF.....     | DAVVD   |     |
| Chi18_13_H._jecorina | ..... | TVWNLFGL..GTAN.....  | PTL.....                | RPFG.....       | SVKLD   |     |
| 04407.1_C._cinereus  | ..... | TVWDMFLG..GRS.....   | DM.....                 | RPFG.....       | NAVLD   |     |
| 6412_P._chrysosporiu | ..... | TIWNLFGL..GSS.....   | ST.....                 | RPFG.....       | DAVLD   |     |
| 2991_P._chrysosporiu | ..... | TIWNLFGL..GSS.....   | ST.....                 | RPFG.....       | SAVLD   |     |
| 40899_P._chrysospori | ..... | QIWNLFGL..GSS.....   | ST.....                 | RPFG.....       | TAILD   |     |
| BAA21861.1_A._thalia | ..... | YLWNNFLG..GK.....    | SS.....                 | SRPLG.....      | DAVLD   |     |
| 07348_C._immitis     | ..... | LIWETFGP..QKN.....   | SS.....                 | RP.....         | DATVD   |     |
| XP_452410_K._lactis  | ..... | TLWNTFGE..GTAD.....  | NV.....                 | ERPFD.....      | TAVVD   |     |
| CTS1_S._cerevisiae   | ..... | TLWDTFGE..GTG.....   | AS.....                 | ERPFD.....      | SAVVD   |     |
| CHT1_C._albicans     | ..... | TLWNKFG..GK.....     | DS.....                 | ERPFD.....      | DAIVD   |     |
| CHT3_C._albicans     | ..... | TLWDLFGN..SKNL.....  | ATN.....                | DRPFY.....      | DAVLD   |     |
| CHT2_C._albicans     | ..... | TLWNKFG..AGE.....    | DP.....                 | ERPFD.....      | DAVVD   |     |
| 05283_L._elongisporu | ..... | TVWDLFGN..SDTL.....  | SSD.....                | ERPFG.....      | DAVLD   |     |
| 03890_L._elongisporu | ..... | TLWNKFGP..TGS.....   | DD.....                 | ERPFD.....      | DAVVD   |     |
| 301747_L._bicolor    | ..... | TIWNMFLG..GSS.....   | AT.....                 | RPFG.....       | HAVLD   |     |
| CAC07216_M._anisopli | ..... | YLWDSYGN..SGNK.....  | TVQ.....                | RPFG.....       | SNFVN   |     |
| Chit30_M._anisopliae | ..... | TVWNLFGL..GTDH.....  | KEL.....                | RPFG.....       | DVKLD   |     |
| AAG25709_M._domestic | ..... | YLWNNFLG..GQ.....    | SS.....                 | SRPLG.....      | AAVLD   |     |
| ABA26457_C._lanatus  | ..... | FLWNNFLG..GQ.....    | SS.....                 | SRPLG.....      | DAVLD   |     |
| CAJ43737_C._arabica  | ..... | YLWNNYLG..GQ.....    | SD.....                 | SRPLG.....      | AAVLD   |     |
| ConcanavalinB_C._ens | ..... | YLHTYFLS..ER.....    | RE.....                 | G..PLG.....     | KVALD   |     |
| Hevamine_H._brasili  | ..... | YLWNNFLG..GK.....    | SS.....                 | SRPLG.....      | DAVLD   |     |



|                      |                                                          |
|----------------------|----------------------------------------------------------|
| Q8L5C6_T._aestivum   | .....HLWNSYFG...GSKP.....SV.....PRPFG.....DAWLD          |
| Q53NL5_O._sativa     | .....NLWNAYLG...GHRA.....GV.....ARPGD.....DAAVD          |
| Chi18_19_H._jecorina | .....YAR...LDA...SD.....EQ...FERYRPLR.....DVIRARGLD      |
| Chi18_20_H._jecorina | .....FNTQTLDS...PD.....SAT...FEHYQGQLR.....DAIVNFQLE     |
| 01393_N._crassa_B    | .....FAR...LDV...PDPDSPDKTALER...FERYYQPLK.....RLIKERGLD |
| 08394_N._crassa_B    | .....FTPDTLDS...AN.....ETV...FNRYYGQLH...ETIKRYGLQ       |
| XP_386145_G._zeae_B  | .....YAR...LDA...DE.....NT...FERFYCPVR...DMIRERALD       |
| XP_382346_G._zeae_B  | .....YTK...LDG...SL.....EG...FHKWYQPLR...KMIKWAGFD       |
| MGG_04073_M._grisea  | .....YER...LDA...DQ.....AQ...FERYYAALH...RMIEHHALE       |
| MGG_01876_M._grisea  | .....FSRRTLDA...PDG...DPD...FEKYYGQLR...DVLRFGLQ         |
| 01513_S._sclerotioru | .....FTR...LDQ...DE.....AT...FELYYGPLR...NLIRERGLD       |
| 03420_S._sclerotioru | .....WNY...FTG...DD.....NQ...FHQYDPLLN...NFIKKYNLN       |
| 05559_B._fuckeliana  | .....FTR...LDQ...DD.....IT...FELYIPLR...NLIRERGLD        |
| 07854_B._fuckeliana  | .....FTR...LDQ...DD.....IT...FELYIPLR...NLIRERGLD        |
| 06595_C._immitis_B   | .....YQR...LDG...SV.....AD...FEAFYCPLR...DMIRTRNLN       |
| AN8245_E._nidulans_B | .....FTC...LDG...DE.....AQ...FEQYGPPL...DMIRRHGLD        |
| 236861_L._bicolor_B  | .....YAN...LAS...D.....FDDYYQLLS...TCITNHGLD             |
| 185397_L._bicolor_B  | .....YES...LSK...D.....FADYYHLLS...TCITNHGLD             |
| UM02758_U._maydis_B  | .....QS...MGK...N.....ATALGRTIA...SFVKKNGLD              |
| 02351_F._neoformans  | .....TT...GGA...D.....AKEVAQRLA...SFVMEYNLD              |
| Chi18_18_H._jecorina | .....FLYNAFGP...YNAS.....YTG...PRPFDDITTG...LPTSVD       |
| ZP_01159542_Photobac | .....IIVLSLGG...AEGT...ITLNNDA...DQANFVSSLT...DIINEWGF   |
| ZP_01234779_V._angus | .....IIVLSLGG...AEGT...ITLNNDA...DQANFVSSLT...DIINEWGF   |
| NP_231586_V._cholera | .....VFVLSLGG...AEGT...ITLNTDQ...DEANFVSSLT...ALIKEWGF   |
| AAO10239_V._vulnific | .....KFVLSLGG...AEGT...ITLNTDQ...DEANFVSSLT...ELINEWGF   |
| NP_902605_C._violace | .....KVVLISLGG...QNGS...VTLNNAT...QVQNFVNSLY...GILTQYGF  |
| NP_980050_B._cereus  | .....KVVLISIGG...QNGV...VLLPDNA...AKQRFINSIQ...SLIDKYGF  |
| 634143_M._xanthus    | .....KVLISIGG...ANGT...VHLDDAT...ARQDFATTMQ...ALIDTYGF   |
| ChiA_S._coelicolor   | .....KVIISVGG...EKGT...VSVNSSA...SATNFANSVY...SVMREYGF   |
| YP_527176.1_S._degra | .....VFVLSLGG...AEGT...ITLNTDA...DEVNFVNSLT...NLINWGF    |
| YP_436543_B_H._cheju | .....KVLISIGG...ANGQ...VQLTSTE...AKDAFVRSVS...AIIDKYGLD  |
| ChiB_S._coelicolor   | .....KVLISIGG...QNGQ...VQLTSTA...ARDKFVSSVS...AIIDEYGLD  |
| YP_432187_H._chejuen | .....KVIISIGG...AEAI...VRLTDAN...AEFEFVDSMT...ALIREYGF   |
| ZP_01353924_C._phyto | .....KVIISVGG...ETGT...VSVNNTT...SATNFANSVY...ALMVKYGF   |
| ZP_00742457_B._thuri | .....KVVLISIGG...QNGV...VLLPDNA...AKQRFINSIQ...SLIDKYDF  |
| ZP_01430879_S._tropi | .....KVIISVGG...ETGR...VTVNDAA...SAVAFADSVY...ALIQQYGF   |
| ChiJ_S._coelicolor   | .....TLLSIGG...ATAG...IDLNSTA...VADRFDVITIV...PILKEYNFD  |
| Chi18_15_H._jecorina | .....TILMSIGG...ATAA...IDLSSSA...VADKFISTIV...PILKQYNEF  |
| YP_349297_P._fluores | .....AVLISLGG...ADA...HIELRAG...QEQLANEIII...RLVETYGF    |
| NP_719615_S._oneiden | .....AVLIALGG...ADA...HIELRKG...QEHDLANEIII...RLVEKYGF   |
| ZP_01236292_V._angus | .....SVLIALGG...ADA...HVEMKTG...DEQAFADIII...RLTDLYGF    |
| ChiC_S._marcescens   | .....AVLISLGG...ADA...HIELKTG...DEDRLKDEIII...RLVEVYGF   |
| YP_237842_P._syringa | .....AVLISLGG...ADA...HIELHAG...QEEALAYEIII...RLVEVYGF   |
| YP_608169_P._entomop | .....VVLMSLGG...ADA...HIALNPG...HEQPLANEIII...RLVETYGF   |
| NP_814153_E._faecali | .....AVLLALGG...ADA...HIQLVKG...DEQAFANEIII...RQVETYGF   |
| YP_014504_L._monocyt | .....AVLLALGG...ADG...HVELKAG...DEEAFANEIII...RQVETYGF   |
| YP_071855_Y._pseudot | .....SVLISLGG...ADA...EISLTSQ...DEAAFVAEIK...RLVDVYGF    |
| YP_053588_M._florum  | .....RVLISMGG...ATAE...HMKFRND...QKDQLKTAIK...SVINEYGF   |
| NP_471330_L._innocua | .....AVLLALGG...ADG...HVELKAG...DEQAFANEIII...RQVETYGF   |
| ZP_01245639_B_F._joh | .....PVIVSIGG...QNGH...VVLDNVT...QKNIFVNGLK...AIIDEYQFD  |

|                      | 190           | 200   | 210 | 220   | 230          | 240     |
|----------------------|---------------|-------|-----|-------|--------------|---------|
| 05455_B._fuckeliana  | GFDFDFEST     | ..... | VSN | ..... | MPTFANQLRSLM | D...TDT |
| 14944_B._fuckeliana  | GFDFDIETQG    | ..... | LTN | ..... | LDVFAQELRTLS | D...AET |
| 13155_S._sclerotioru | GFDFDIETAPDS  | ..... | SEG | ..... | YIAMINRLREHF | A...ENP |
| 08695_S._sclerotioru | GFDFDIETVG    | ..... | LAN | ..... | LEVFAQELRSLS | D...AET |
| 11212_S._sclerotioru | GFDFDFEST     | ..... | VSN | ..... | MPAFANQLRSLM | D...TDN |
| EAA72615_G._zeae     | GFDFDIEHDL    | ..... | NGP | ..... | YIAMINRLRELD | E...G.. |
| 02184_N._crassa      | GFNLDGELKLNAG | ..... | EGA | ..... | YAAMAKKLRELY | N...GNA |
| 04500_N._crassa      | GFDFDFEAV     | ..... | AQN | ..... | MVPFATRLRSLM | D...SAA |
| MGG_03599_M._grisea  | GFDLDIEFPV    | ..... | GEG | ..... | YRALALRLRAHY | A...SVP |

|                      |                       |              |                         |         |       |
|----------------------|-----------------------|--------------|-------------------------|---------|-------|
| MGG_01333_M._grisea  | GFDDLDFETHG.....      | IKN.....     | LAAFARRLRQVM.....       | D...    | TAA   |
| 16099_R._oryzae      | GFDLDIENG.....        | AKDG.....    | YPAFVNRMREHY.....       | A...    | KET   |
| 10112_R._oryzae      | GFDLDIEGG.....        | GSTG.....    | YAAMVKRLRSHF.....       | N...    | SDR   |
| 04523_R._oryzae      | GIDLDIEGG.....        | SSTG.....    | YAAFVTALRSK.....        |         |       |
| 11152_R._oryzae      | GIDLDIEGG.....        | SSGG.....    | YAALVTALRSKS.....       | A...    | S..   |
| 08153_R._oryzae      | GIDLDIEGG.....        | GSNH.....    | YTTFLQALSS.H.....       | F...    | VNA   |
| NP_594130_S._pombe   | GFDFEVNKG.....        | TNTA.....    | YSAFAKRMLEIY.....       | A...    | SDP   |
| 00864_P._nodorum     | GFDLDEAEASKVPRPE..... | LISAN.....   | YGFLVNELKRFN.....       | N...    | D..   |
| 08680_P._nodorum     | GFDFDFEDETAVF.....    | ASRH.....    | RDAFIKELSSLA.....       | R...    | AAET  |
| AN8241_E._nidulans   | GFDFDIEFFG.....       | SKG.....     | YANMIKRRRRF.....        | G...    | EVF   |
| AN8217_E._nidulans   | GFDFDFEAA.....        | VTN.....     | TGVFATRLRALA.....       | D...    | ADT   |
| Chi18_14_H._jecorina | GFDLDIENPGT.....      | NEN.....     | YAALVSALRSNF.....       | A...    | SDP   |
| Chi18_16_H._jecorina | GFDFDIELNAG.....      | SOY.....     | YQYLISLRSNF.....        | A...    | NDP   |
| Chi18_12_H._jecorina | GFDFDFEST.....        | TNN.....     | LVAFGAQLRTL.....        | DAAATDS |       |
| Chi18_17_H._jecorina | GFDFDLEDP.....        | IENN.....    | MEPFAAELRSLI.....       | D...    | AST   |
| Chi18_13_H._jecorina | GVDLNETG.....         | NPTG.....    | YLAMAQRFKSNF.....       | A...    | KDT   |
| 04407.1_C._cinereus  | GVDLDIEGG.....        | TSGH.....    | YGAFVNKIRA.L.....       | A...    | APT   |
| 6412_P._chrysosporiu | GVDLDIEGG.....        | TSTG.....    | YAAFINRIQS.H.....       | A...    | SGA   |
| 2991_P._chrysosporiu | GVDLDIEGG.....        | STQY.....    | FTTFVSTLRS.L.....       | M...    | NGG   |
| 40899_P._chrysospori | GIDLDIESG.....        | TPAH.....    | YAAFVNQIRS.L.....       | A...    | APT   |
| BAA21861.1_A._thalia | GIDFNIELGS.....       | PQH.....     | WDDLARTLSKFS.....       | H.....  | R     |
| 07348_C._immitis     | GFDLDFEAT.....        | VRN.....     | MVPFANRLRSLM.....       | A...    | ADA   |
| XP_452410_K._lactis  | GFDFDIENN.....        | NPTG.....    | YASLATKLRSLY.....       | A...    | KGS   |
| CTS1_S._cerevisiae   | GFDFDIENN.....        | NEVG.....    | YSALATKLRTL.....        | A...    | EGT   |
| CHT1_C._albicans     | GFDFDIENK.....        | DQTG.....    | YAALATQLR.KY.....       | F...    | STG   |
| CHT3_C._albicans     | GFDFDIENN.....        | WSTG.....    | YPALATELRTLF.....       | Q...    | KDT   |
| CHT2_C._albicans     | GFDFDIEHG.....        | GATG.....    | YPELATALRGKF.....       | A...    | KDT   |
| 05283_L._elongisporu | GFDDYDIENN.....       | SPTG.....    | YAAMASELRTIF.....       | A...    | TDT   |
| 03890_L._elongisporu | GFDFDIELG.....        | TDVG.....    | YPQLATALRSKF.....       | A...    | SDS   |
| 301747_L._bicolor    | GIDLDFENG.....        | TSDY.....    | FATFVNTIRS.L.....       | E...    | KGT   |
| CAC07216_M._anisopli | GFDFDIEVNGGS.....     | SOY.....     | YQYMIAKLRSNF.....       | G...    | SDE   |
| Chit30_M._anisopliae | GVDLNETN.....         | DGTG.....    | YLAMTKQFKANF.....       | Q...    | KDT   |
| AAG25709_M._domestic | GIDFDIEGGT.....       | DQH.....     | WDDLARYLSGYS.....       | K.....  | R     |
| ABA26457_C._lanatus  | GIDFDIESGS.....       | GQW.....     | WDELARQLKGFG.....       |         |       |
| CAJ43737_C._arabica  | GIDFDIEYGS.....       | NLY.....     | WDDLARALSGYS.....       | T...    | A     |
| ConcanavalinB_C._ens | GIHFDIQKPD.....       | ELN.....     | WDNLLEELYQIK.....       | D...    | VY    |
| Hevamine_H._brasili  | GIDFDIEHGS.....       | TLY.....     | WDDLARYLSAYS.....       | K.....  | Q     |
| Q8L5C6_T._aestivum   | GVDLFLEHGT.....       | ADR.....     | YDVLALAKHN.....         |         | IRGGP |
| Q53NL5_O._sativa     | GIDFFIDQGG.....       | ADH.....     | YDDLARRLDGYN.....       | KYYRGRV |       |
| Chi18_19_H._jecorina | GLDLVVEEE.....        | MSLGG.....   | VVKLIDRLRSDF.....       | G.....  |       |
| Chi18_20_H._jecorina | GMDLDVEQP.....        | MSQQG.....   | IDRLIARLRADF.....       | G.....  |       |
| 01393_N._crassa_B    | GLDLVVEEE.....        | MSLAG.....   | VIIYLIDRLRSDF.....      | G.....  |       |
| 08394_N._crassa_B    | GLDIDVEQP.....        | MSQGG.....   | IERLILRLRADF.....       | G.....  |       |
| XP_386145_G._zeae_B  | GLDLVVEEV.....        | MSLGG.....   | IVRLIDRLRSDF.....       | G.....  |       |
| XP_382346_G._zeae_B  | GLDLDIEEA.....        | MSLGG.....   | VIRLIDHLKTD.....        | G.....  |       |
| MGG_04073_M._grisea  | GLDLVVEEP.....        | MSLQG.....   | IVRLIDRLRADF.....       | G.....  |       |
| MGG_01876_M._grisea  | GLDLDVEEP.....        | MSLRG.....   | AVRLVRLREDF.....        | G.....  |       |
| 01513_S._sclerotioru | GLDLDVEEE.....        | MTLAG.....   | IIRLIDRLKADF.....       | G.....  |       |
| 03420_S._sclerotioru | GIDIDVEQF.....        | VDITV.....   | ALRLIKQLYKDM.....       | G.....  |       |
| 05559_B._fuckeliana  | GLDLVVEEE.....        | MTLAG.....   | IIRLIDRLKADF.....       | G.....  |       |
| 07854_B._fuckeliana  | GIDIDVEQF.....        | VDITV.....   | ALRLIKQLYTDM.....       | G.....  |       |
| 06595_C._immitis_B   | GLDLVVEED.....        | MSLDG.....   | IIRLIDRLKSDF.....       | G.....  |       |
| AN8245_E._nidulans_B | GIDLDVEEP.....        | MSLAG.....   | IVRLIDRLKADL.....       | G.....  |       |
| 236861_L._bicolor_B  | GFDLDIEEP.....        | DSLAN.....   | IVKLIQKLRSDF.....       | G.....  |       |
| 185397_L._bicolor_B  | GFDLDIEET.....        | DSLND.....   | VVKLIQQLRSDF.....       | G.....  |       |
| UM02758_U._maydis_B  | GVVDVYEEM.....        | ELFAQGK..... | SSEWLIELTRSLRNQL.....   | PS..... |       |
| 02351_F._neoformans  | GVDDIDYEDM.....       | SAMNSAR..... | AVSWIVELQVELRNLL.....   | PS..... |       |
| Chi18_18_H._jecorina | GFDFDIEADFP.....      | NGP.....     | YIKMIETFRSLD.....       | S...    | S..   |
| ZP_01159542_Photobac | GLDIDLESG.....        | SNLLHG.....  | TEIQARLPVALKQIEANI..... | G.....  |       |
| ZP_01234779_V._angus | GLDIDLESG.....        | SNLLHG.....  | TEIQARLPVALKQIEANI..... | G.....  |       |
| NP_231586_V._cholera | GLDLDLESG.....        | SNLVHG.....  | SQIQARLGRLKQIEKNI.....  | G.....  |       |
| AAO10239_V._vulnific | GLDLDLESG.....        | SNLVHG.....  | SQIQARLGRLKQIEQNI.....  | G.....  |       |

NP\_902605\_C\_violace GIDLDLESG.....SGIVVG.APVVSNLVSAVKQLKAKI.....G.....  
NP\_980050\_B\_cereus GIDLDLESG.IYLNNGN...DTNFKNPPTTPQIVNLI SAIRTISDHY.....G.....  
634143\_M\_xanthus GLDLDLEGGSSLSLNGG...DTDFRNPTTPRIVNIIQATRQLLNQN.....G.....  
ChiA\_S\_coelicolor GVDIDLENG.....LNP.T....YMTQALRALSAKA.....G.....  
YP\_527176.1\_S\_degra GVDIDLESG.....SOLLHG.SQIQARLITSRLTIDANV.....G.....  
YP\_436543\_B\_H\_cheju GLDIDFEGHSLYLNSG...DNDFRNPPTTPVIVNLI AALKELKAKY.....G.....  
ChiB\_S\_coelicolor GLDIDFEGHSLSLNAD...DTDFKNPKTPVIVNLS AVKTLKAKY.....G.....  
YP\_432187\_H\_chejue GFDIDLEGGSSLSLDAG...DTDFKNPKSPVLTH LISASKRIISNF.....G.....  
ZP\_01353924\_C\_phyto GVDIDLENG.....INA.T....YMTSALRQLSTKA.....G.....  
ZP\_00742457\_B\_thuri GIDIDLESG.IYLNNGN...DTNFKNPPTTPQIVNLI SAIRTISDHY.....G.....  
ZP\_01430879\_S\_tropi GVDIDLENG.....LNP.T....YMAQALRSRLAQV.....G.....  
ChiJ\_S\_coelicolor GIDIDIETGLTG.....SGNINQLSASQSNLIRI IDGVLARM.....P.....  
Chi18\_15\_H\_jecorina GLDIDIETGLTG.....SGSVGTLSQSANLIRI IDGILAQM.....P.....  
YP\_349297\_P\_fluores GIDIDLEQS.....AIDFAANKTVLPAALKLV KDHYAGQ.....G.....  
NP\_719615\_S\_oneiden GLDIDLEQA.....AVTAADNQIVIPAALRIVK DHYRKQ.....Q.....  
ZP\_01236292\_V\_angus GLDIDLEQA.....AIDAADNQTVIPAALRMVK DHYRAQ.....G.....  
ChiC\_S\_marcescens GLDIDLEQA.....AIGAANNKTVLPAALKKVK DYYAAQ.....G.....  
YP\_237842\_P\_syringa GLDIDLEQA.....AITFADNRTVLP AALRMVREHYETE.....G.....  
YP\_608169\_P\_entomop GLDIDLEQS.....AIDFAANKTVLPAALKLV KDHYAAE.....G.....  
NP\_814153\_E\_faecali GLDIDLEQL.....AITAGDNQTVIPATL KIVKDHYRAQ.....G.....  
YP\_014504\_L\_monocyt GLDIDLEQS.....AITAGDNKTVIPAALKIVK DHYKAE.....G.....  
YP\_071855\_Y\_pseudot GLDIDLEQA.....AISYKENSTVIPRALKTV KDYYANL.....G.....  
YP\_053588\_M\_florum GLDIDWESE.....SLKSSSEKNVTA EALKELKDEYKSE.....G.....  
NP\_471330\_L\_innocua GLDIDLEQS.....AITAGDNKTVIPAALKIVK DHYKAE.....G.....  
ZP\_01245639\_B\_F\_joh GVDIDFEGGSMNFNAGGLRDISYAGISAY PRLKNVVD AFKELKAYY.....G.....

|                     | 250                                                         | 260           | 270     | 280  | 290 | 300 |
|---------------------|-------------------------------------------------------------|---------------|---------|------|-----|-----|
| 05455_B_fuckeliana  | .... .... .... .... .... .... .... .... .... .... .... .... | TKT.WL        | LSAAPQC | CPYP |     |     |
| 14944_B_fuckeliana  |                                                             | SKK.YY        | LTAAPQC | CPYP |     |     |
| 13155_S_sclerotioru |                                                             | SKK.YF        | ISGAPQC | PLP  |     |     |
| 08695_S_sclerotioru |                                                             | SKK.YY        | LTAAPQC | CPYP |     |     |
| 11212_S_sclerotioru |                                                             | SRT.WL        | LSAAPQC | CPYP |     |     |
| EAA72615_G_zeae     |                                                             | LT            | ITGAPQC | PTS  |     |     |
| 02184_N_crassa      |                                                             | E.LL          | LTAAPGC | SLD  |     |     |
| 04500_N_crassa      |                                                             | ATSGKK.FL     | LSSAPQC | PFP  |     |     |
| MGG_03599_M_grisea  |                                                             | GRRKIRL       | LTASPQC | CVVP |     |     |
| MGG_01333_M_grisea  | RPAAVLPSDDKSYP                                              | MVPSPEATKK.FY | LAAAPQC | CVFP |     |     |
| 16099_R_oryzae      |                                                             | SKE.YY        | IAAAPQC | PFP  |     |     |
| 10112_R_oryzae      |                                                             | SKK.YY        | ITGAPQC | PFP  |     |     |
| 04523_R_oryzae      |                                                             | GH.FL         | IGAAPQC | PFP  |     |     |
| 11152_R_oryzae      |                                                             | QD.FL         | IGAAPQC | PFP  |     |     |
| 08153_R_oryzae      |                                                             | SKK.YY        | ITAAPQC | CVFP |     |     |
| NP_594130_S_pombe   |                                                             | RRK.YY        | ISAAPT  | CMVP |     |     |
| 00864_P_nodorum     |                                                             | FL            | ITAAPQC | CEVP |     |     |
| 08680_P_nodorum     | AG                                                          | GKK.FY        | FSAAP   | ECTQ |     |     |
| AN8241_E_nidulans   |                                                             | DQT.FY        | ISAAPQC | SIP  |     |     |
| AN8217_E_nidulans   |                                                             | SKK.YY        | LTAAPQC | PYP  |     |     |
| Chi18_14_H_jecorina |                                                             | SRQ.YV        | ISGAPQC | PLP  |     |     |
| Chi18_16_H_jecorina |                                                             | KNT.YY        | ITGAPQC | PIP  |     |     |
| Chi18_12_H_jecorina |                                                             | NKK.FY        | LAAAPQC | FFP  |     |     |
| Chi18_17_H_jecorina |                                                             | SKK.FY        | LSAAPQC | PYP  |     |     |
| Chi18_13_H_jecorina |                                                             | SKK.YY        | LTAAPQC | PFP  |     |     |
| 04407.1_C_cinereus  |                                                             | GKK.YY        | VTAPQC  | CVYP |     |     |
| 6412_P_chrysosporiu |                                                             | SKK.YY        | ITGAPQC | CVYP |     |     |
| 2991_P_chrysosporiu |                                                             | SKK.YY        | ITGAPQC | PFP  |     |     |
| 40899_P_chrysospori |                                                             | GKK.YI        | ITAAPQC | PYP  |     |     |
| BAA21861.1_A_thalia |                                                             | GRK.IY        | LTGAPQC | PFP  |     |     |
| 07348_C_immitis     |                                                             | SKK.YF        | LTVAPQC | PYP  |     |     |
| XP_452410_K_lactis  |                                                             | KD.YY         | LAAAPQC | CVYP |     |     |
| CTS1_S_cerevisiae   |                                                             | KQ.YY         | LSAAPQC | PYP  |     |     |
| CHT1_C_albicans     |                                                             | TKS.YY        | LSAAPQC | PYP  |     |     |

|                      |                                                |
|----------------------|------------------------------------------------|
| CHT3_C._albicans     | .....SKN..YY.....LGAAPQCPYP.....               |
| CHT2_C._albicans     | .....SKN..YF.....LSAAPQCPYP.....               |
| 05283_L._elongisporu | .....SKL..YY.....LGAAPQCVYP.....               |
| 03890_L._elongisporu | .....SKS..YY.....LSAAPQCPYP.....               |
| 301747_L._bicolor    | .....DKR..YY.....ITAAPQCTSL.....               |
| CAC07216_M._anisopli | .....ANT..YY.....ITGAPQCPYP.....               |
| Chit30_M._anisopliae | .....SKK..YY.....ITAAPQCPYP.....               |
| AAG25709_M._domestic | .....GKK..VY.....LTAAPQCPFP.....               |
| ABA26457_C._lanatus  | .....Q..VL.....LSAAPQCPYP.....                 |
| CAJ43737_C._arabica  | .....ERK..VY.....LSAAPQCPFP.....               |
| ConcanavalinB_C._ens | .....QST..FL.....LSAAPGCLSP.....               |
| Hevamine_H._brasili  | .....GKK..VY.....LTAAPQCPFP.....               |
| Q8L5C6_T._aestivum   | .....GKP..LH.....LTATVRCGYPP.....              |
| Q53NL5_O._sativa     | .....G...VL.....LTATTRCSYP.....                |
| Chi18_19_H._jecorina | .....KG..FL.....ITLAPVAAALL.....               |
| Chi18_20_H._jecorina | .....PD..FL.....ITLAPVASALE.....               |
| 01393_N._crassa_B    | .....PD..FL.....ITLAPVAAAML.....               |
| 08394_N._crassa_B    | .....KD..FI.....ITLAPVASALT.....               |
| XP_386145_G._zeae_B  | .....PT..FI.....ITLAPVAMSLI.....               |
| XP_382346_G._zeae_B  | .....QS..FL.....VTLAPVAPALR.....               |
| MGG_04073_M._grisea  | .....PD..FI.....ITLAPVATALL.....               |
| MGG_01876_M._grisea  | .....PD..FV.....LTQAPVGTALS.....               |
| 01513_S._sclerotioru | .....SG..FI.....ITLAPVAAALI.....               |
| 03420_S._sclerotioru | .....LG..FD.....ITMAPVASALS.....               |
| 05559_B._fuckeliana  | .....AG..FI.....ITLAPVAAALV.....               |
| 07854_B._fuckeliana  | .....PD..FD.....ITMAPVASALY.....               |
| 06595_C._immitis_B   | .....DE..FI.....ITLAPVATAMV.....               |
| AN8245_E._nidulans_B | .....ER..FI.....ITLAPVAAALL.....               |
| 236861_L._bicolor_B  | .....ED..FI.....ITLAPVASALK.....               |
| 185397_L._bicolor_B  | .....ED..FI.....ITLAPVASALK.....               |
| UM02758_U._maydis_B  | .....PD..YI.....ITHAPVAPWFN.....               |
| 02351_F._neoformans  | .....P...YI.....ISHAPVAPWFT.....               |
| Chi18_18_H._jecorina | .....ML.....ITGAPQCPTN.....                    |
| ZP_01159542_Photobac | .....GD..MY.....LTMAPEHPYVQGGMIAYS.....        |
| ZP_01234779_V._angus | .....GD..MY.....LTMAPEHPYVQGGMIAYS.....        |
| NP_231586_V._cholera | .....GD..MF.....LTMAPEHPYVQGGMVAYS.....        |
| AAO10239_V._vulnific | .....GD..MY.....LTMAPEHPYVQGGMVAYS.....        |
| NP_902605_C._violace | .....PN..FY.....LSMAPEHPYVQGGFVAYG.....        |
| NP_980050_B._cereus  | .....PD..FL.....LSMAPETAYVQGGYSAYG.....        |
| 634143_M._xanthus    | .....PG..FI.....LTMAPEETAYVQGGMAAYG.....       |
| ChiA_S._coelicolor   | .....PD..MI.....LTMAPQTIDMQS..TQGG.....        |
| YP_527176.1_S._degra | .....G...MV.....LTMAPEHPYVQGGYIAYS.....        |
| YP_436543_B_H._cheju | .....AG..FV.....LTMAPEETFFVQNGYSFYGS.....      |
| ChiB_S._coelicolor   | .....DG..FV.....LTMAPEETFFVQLGYQYYGT.....      |
| YP_432187_H._chejuen | .....GN..LM.....LTMAPEETYYYVQGGFSAYG.....      |
| ZP_01353924_C._phyto | .....SG..LI.....ITMAPQTLDMQS..VNSG.....        |
| ZP_00742457_B._thuri | .....PD..FL.....LSMAPETAYVQGGYSAYG.....        |
| ZP_01430879_S._tropi | .....AE..LI.....IAMAPQTIDMQN..PTTS.....        |
| ChiJ_S._coelicolor   | .....SN..FG.....LTMAPEETAYVTGGSIVYG.....       |
| Chi18_15_H._jecorina | .....SN..FG.....LTMAPEETAYVTGGSIVYG.....       |
| YP_349297_P._fluores | .....KH..FI.....ISMAPEFFPYLT.....              |
| NP_719615_S._oneiden | .....KN..FL.....ITMAPEFFPYLT.....              |
| ZP_01236292_V._angus | .....KN..FL.....ITMAPEFFPYLT.....              |
| ChiC_S._marcescens   | .....KN..FI.....ISMAPEFFPYLR.....              |
| YP_237842_P._syringa | .....KH..FI.....ISMAPEFFPYLRSAARDTPLLKETT..... |
| YP_608169_P._entomop | .....KH..FI.....ISMAPEFFPYLT.....              |
| NP_814153_E._faecali | .....KN..FI.....ITMAPEFFPYLK.....              |
| YP_014504_L._monocyt | .....KN..FL.....ITMAPEFFPYLK.....              |
| YP_071855_Y._pseudot | .....QH..FI.....ISMAPEFFPYLR.....              |
| YP_053588_M._florum  | .....KD..FI.....ITMAPEFFPYLR.....              |
| NP_471330_L._innocua | .....KN..FL.....ITMAPEFFPYLK.....              |
| ZP_01245639_B_F._joh | .....PG..FL.....LTAAPETQYVQGGYTTYT.....        |



|                      | 310 | 320 | 330           | 340      | 350 | 360     |        |
|----------------------|-----|-----|---------------|----------|-----|---------|--------|
| 05455_B._fuckeliana  | D   | A   | ADGPMLDG      | TVA      | FD  | IVWVQF  |        |
| 14944_B._fuckeliana  | D   | Q   | ADKSFLQG      | AVS      | FD  | AVFVQF  |        |
| 13155_S._sclerotioru | E   | P   | NMGAMIAG      | AKFD     |     | LLWIQF  |        |
| 08695_S._sclerotioru | D   | Q   | ADKSFLQG      | EVS      | FD  | AVFVQF  |        |
| 11212_S._sclerotioru | D   | A   | ADGPMLENG     | AVS      | FD  | IVWVQF  |        |
| EAA72615_G._zeae     | D   |     | EYFYMKDMIKS   | AKFD     |     | ALFVQF  |        |
| 02184_N._crassa      | D   |     | VKMKAIKFDN    | AQFD     |     | ALFIQF  |        |
| 04500_N._crassa      | D   | R   | ANNDLLQS      | VA       | FD  | FVSVQF  |        |
| MGG_03599_M._grisea  | D   | S   | NLSDVIRA      | VRFD     |     | ALFIQF  |        |
| MGG_01333_M._grisea  | D   | A   | AMDAALSSD     | VA       | FD  | FIMVQF  |        |
| 16099_R._oryzae      | D   | F   | FLGETLDS      | SWFD     |     | FIMIQF  |        |
| 10112_R._oryzae      | D   | A   | MLGPALDA      | SE       | FD  | AVFVQF  |        |
| 04523_R._oryzae      | D   | A   | ILGSVIDA      | VG       | LD  | FVNVQF  |        |
| 11152_R._oryzae      | D   | A   | LLGPVIDA      | VG       | LD  | YVNVQF  |        |
| 08153_R._oryzae      | D   | A   | NLQATLNS      | FS       | FD  | AIYVQF  |        |
| NP_594130_S._pombe   | D   | H   | TLTKAISE      | NS       | FD  | FLSIHT  |        |
| 00864_P._nodorum     | D   |     | IRLFDAIKN     | AHFD     |     | MIETQF  |        |
| 08680_P._nodorum     |     |     | KNSLLSS       | IK       | YD  | MVFVQF  |        |
| AN8241_E._nidulans   | D   | E   | QLSVAIKN      | AVID     |     | FVWVQF  |        |
| AN8217_E._nidulans   | D   | A   | AGKDILNTNSSAA | ID       |     | AVFVQF  |        |
| Chi18_14_H._jecorina | E   | P   | NMGVIIQN      | AQFD     |     | YLWVQF  |        |
| Chi18_16_H._jecorina | E   | P   | NMGEIIST      | SQFD     |     | YLWVQF  |        |
| Chi18_12_H._jecorina | D   | A   | AVGPLIN       | AVP      | MD  | WIQIQF  |        |
| Chi18_17_H._jecorina | D   | V   | SDESFLDG      | QVP      | FD  | WVNVQF  |        |
| Chi18_13_H._jecorina | D   | A   | SEPLNV        | CQLAD    |     | YIWWQF  |        |
| 04407.1_C._cinereus  | D   | A   | ALGEVLNQ      | VA       | FD  | AVYVQF  |        |
| 6412_P._chrysosporiu | D   | A   | SLGGVLNA      | AK       | FD  | AIYVQF  |        |
| 2991_P._chrysosporiu | D   | A   | YLGNVINS      | VG       | FD  | AVYVQF  |        |
| 40899_P._chrysospori | D   | A   | YIGAALNQ      | AD       | FD  | AVYVQF  |        |
| BAA21861.1_A._thalia | D   | R   | LMGSALNT      | KRFD     |     | YVWIQF  |        |
| 07348_C._immitis     | D   | L   | YNKEMLEG      | KVD      | FD  | AVFVQF  |        |
| XP_452410_K._lactis  | D   | A   | SVGDALAN      | AD       | ID  | IAFVQF  |        |
| CTS1_S._cerevisiae   | D   | A   | SVGDLEN       | AD       | ID  | FAFIQF  |        |
| CHT1_C._albicans     | D   | E   | SVGDLMSQ      | VD       | LD  | FAFIQF  |        |
| CHT3_C._albicans     | D   | A   | SVGPLLKQ      | SE       | ID  | FVFIQF  |        |
| CHT2_C._albicans     | D   | A   | SLGDLISK      | VP       | LD  | FAFIQF  |        |
| 05283_L._elongisporu | D   | A   | SVGDLLDE      | SY       | ID  | FVFIQF  |        |
| 03890_L._elongisporu | D   | A   | LLDDLNFQ      | VS       | LD  | YAFIQF  |        |
| 301747_L._bicolor    | D   | S   | AWSGLLNS      | TS       | FD  | AIYVQF  |        |
| CAC07216_M._anisopli | E   | P   | NMGVIISN      | SVFD     |     | HLVYVQF |        |
| Chit30_M._anisopliae | D   | Q   | SEPLDV        | CQLLD    |     | WVQVQF  |        |
| AAG25709_M._domestic | D   | A   | YVGNAKLT      | GLFD     |     | NVWVQF  |        |
| ABA26457_C._lanatus  | D   | A   | HLDAAIKT      | GLFD     |     | FVWVQF  |        |
| CAJ43737_C._arabica  | D   | Y   | YLDVAIRT      | GLFD     |     | FVWVQF  |        |
| ConcanavalinB_C._ens | D   | E   | YLDNAIQT      | RHFD     |     | YIFVRF  |        |
| Hevamine_H._brasilie | D   | R   | YLGTALNT      | GLFD     |     | YVWVQF  |        |
| Q8L5C6_T._aestivum   | A   | A   | HVGRALAT      | GIFE     |     | RVHVRT  |        |
| Q53NL5_O._sativa     | D   | H   | RLEKALAT      | GVFA     |     | RIHVVRM |        |
| Chi18_19_H._jecorina |     | D   | HRSNLSGF      | D        | YE  | ALEVMR  |        |
| Chi18_20_H._jecorina |     | DS  | SNLSGF        | S        | YT  | ALQQTQ  |        |
| 01393_N._crassa_B    |     | N   | PRHNLSGF      | D        | YE  | ALEVMR  |        |
| 08394_N._crassa_B    |     | MGG | WNLSGF        | D        | YR  | KLMLAP  |        |
| XP_386145_G._zeae_B  |     | D   | FRRNLSGF      | D        | YE  | ALEVMR  |        |
| XP_382346_G._zeae_B  |     | N   | EQNLGGF       | N        | ME  | ELEKGL  |        |
| MGG_04073_M._grisea  |     |     | GDDDPNRNLSGF  | G        | YD  | ALHAER  |        |
| MGG_01876_M._grisea  |     |     | RGG           | APNLSGF  | S   | YR      | DLDQAV |
| 01513_S._sclerotioru |     |     | SER           | PEHNLSGF | N   | YE      | ALEVMR |
| 03420_S._sclerotioru |     |     | YG            | GSLSGF   | S   | YS      | DLDQAQ |
| 05559_B._fuckeliana  |     |     | SDL           | PKHNLSGF | N   | YE      | ALEVMR |

|                      |                                                        |
|----------------------|--------------------------------------------------------|
| 07854_B._fuckeliana  | .....HG.....GSLSGF.....S.YS.....DLDAQA                 |
| 06595_C._immitis_B   | .....HG.....LRHLSGF.....D.YR.....ALETAR                |
| AN8245_E._nidulans_B | .....G.....IGNLSGF.....D.YR.....LLEQQR                 |
| 236861_L._bicolor_B  | .....GG.....KDPFSGI.....T.YS.....DLEKNY                |
| 185397_L._bicolor_B  | .....GG.....EDPFSGI.....N.YS.....DLEKNY                |
| UM02758_U._maydis_B  | .....AQMYPNG.....YA.....YIHSQV                         |
| 02351_F._neoformans  | .....S.....ANDYSDG.....S.YV.....AIHQVQV                |
| Chi18_18_H._jecorina | .....P.....QYFVMKDMIQQ.....AAFD.....KLFIQF             |
| ZP_01159542_Photobac | .....GIWG.....AYIPMINELRD.....M.LN.....LLHVQL          |
| ZP_01234779_V._angus | .....GIWG.....AYIPMINELRD.....M.LN.....LLHVQL          |
| NP_231586_V._cholera | .....GIWG.....AYIPVINEVRD.....T.LD.....ILHVQL          |
| AAO10239_V._vulnific | .....GIWG.....AYIPVINATRS.....T.LD.....LLHVQL          |
| NP_902605_C._violace | .....GNWG.....AYLPIDGLRD.....D.LS.....VIHSQY           |
| NP_980050_B._cereus  | .....SIWG.....AYLPPIYGVKD.....K.LT.....YIHVQH          |
| 634143_M._xanthus    | .....GPWG.....AYLPVIHALRD.....R.LA.....YLVHQB          |
| ChiA_S._coelicolor   | .....YFQTALNVKD.....I.LT.....VVMQY                     |
| YP_527176.1_S._degra | .....GIWG.....AYLPIDALRD.....Q.LD.....LLHVQL           |
| YP_436543_B_H._cheju | .....GQWGGADPRCGAYLPVIYAMRN.....D.LT.....LLHVQD        |
| ChiB_S._coelicolor   | .....GKWGGQDPRAGAYLPVIHALRD.....D.LT.....LLHVQD        |
| YP_432187_H._chejuen | .....GSGS.....AYLPVIHALRN.....E.LS.....FHVQB           |
| ZP_01353924_C._phyto | .....YFQVALNIKD.....I.LT.....VVNTQY                    |
| ZP_00742457_B._thuri | .....SIWG.....AYLPPIYGVKD.....K.LT.....YIHVQB          |
| ZP_01430879_S._tropi | .....YFKLALDIQD.....I.LT.....VVNTQF                    |
| ChiJ_S._coelicolor   | .....SIWG.....AYLPPIKKYAENG.....R.LW.....WVNMQY        |
| Chi18_15_H._jecorina | .....SIWG.....AYLPPIKKYVDNG.....R.LW.....WVNMQY        |
| YP_349297_P._fluores | .....TSG.....KYVGYLQALEGY.....YD.....FIAPQF            |
| NP_719615_S._oneiden | .....TGG.....KYVPYINALEGY.....YD.....WINPQF            |
| ZP_01236292_V._angus | .....ESG.....KYIPYITGLEGY.....YD.....WINPQF            |
| ChiC_S._marcescens   | .....TNG.....TYLDYINALEGY.....YD.....FIAPQY            |
| YP_237842_P._syringa | YFPFLKEAVAFLTFSRSGG.....AYLAYIEALEDL.....YD.....FIAPQY |
| YP_608169_P._entomop | .....AAG.....RYVPYLKALEGY.....YD.....FIAPQF            |
| NP_814153_E._faecali | .....PGA.....AYETYITSLNGY.....YD.....YIAPQL            |
| YP_014504_L._monocyt | .....PGS.....AYESYLTSNLANY.....YD.....YIAPQL           |
| YP_071855_Y._pseudot | .....INE.....AYVPYIKALEGY.....YD.....FIAPQY            |
| YP_053588_M._florum  | .....KIKEADG.....NYKEFLDGLDGY.....YD.....WINPQF        |
| NP_471330_L._innocua | .....PGS.....AYESYLTSNLANY.....YD.....YIAPQL           |
| ZP_01245639_B_F._joh | .....DTFG.....SFLPIIQNLRN.....E.LD.....LLAVQL          |

370 380 390 400 410 420

|                      |           |
|----------------------|-----------|
| 05455_B._fuckeliana  | YNN.....  |
| 14944_B._fuckeliana  | YNN.....  |
| 13155_S._sclerotioru | YNN.....  |
| 08695_S._sclerotioru | YNN.....  |
| 11212_S._sclerotioru | YNN.....  |
| EAA72615_G._zeae     | YNN.....  |
| 02184_N._crassa      | YNN.....  |
| 04500_N._crassa      | YNN.....  |
| MGG_03599_M._grisea  | YNT.....  |
| MGG_01333_M._grisea  | YNN.....  |
| 16099_R._oryzae      | YNN.....  |
| 10112_R._oryzae      | YNN.....  |
| 04523_R._oryzae      | YNN.....  |
| 11152_R._oryzae      | YNN.....  |
| 08153_R._oryzae      | YNN.....  |
| NP_594130_S._pombe   | FNSS..... |
| 00864_P._nodorum     | YNT.....  |
| 08680_P._nodorum     | YNN.....  |
| AN8241_E._nidulans   | YNT.....  |
| AN8217_E._nidulans   | YNN.....  |
| Chi18_14_H._jecorina | YNN.....  |
| Chi18_16_H._jecorina | YNN.....  |

|                      |                                                           |
|----------------------|-----------------------------------------------------------|
| Chi18_12_H._jecorina | YNN.....                                                  |
| Chi18_17_H._jecorina | YNN.....                                                  |
| Chi18_13_H._jecorina | YNN.....                                                  |
| 04407.1_C._cinereus  | YNN.....                                                  |
| 6412_P._chrysosporiu | YNN.....                                                  |
| 2991_P._chrysosporiu | YNN.....                                                  |
| 40899_P._chrysospori | YNN.....                                                  |
| BAA21861.1_A._thalia | YNN.....                                                  |
| 07348_C._immitis     | YNN.....                                                  |
| XP_452410_K._lactis  | YNN.....                                                  |
| CTS1_S._cerevisiae   | YNN.....                                                  |
| CHT1_C._albicans     | YNN.....                                                  |
| CHT3_C._albicans     | YNN.....                                                  |
| CHT2_C._albicans     | YNN.....                                                  |
| 05283_L._elongisporu | YNN.....                                                  |
| 03890_L._elongisporu | YNN.....                                                  |
| 301747_L._bicolor    | YNN.....                                                  |
| CAC07216_M._anisopli | YNN.....                                                  |
| Chit30_M._anisopliae | YNN.....                                                  |
| AAG25709_M._domestic | YNN.....                                                  |
| ABA26457_C._lanatus  | YNN.....                                                  |
| CAJ43737_C._arabica  | YNN.....                                                  |
| ConcanaValinB_C._ens | YND.....                                                  |
| Hevamine_H._brasilie | YNN.....                                                  |
| Q8L5C6_T._aestivum   | YES.....                                                  |
| Q53NL5_O._sativa     | FGD.....                                                  |
| Chi18_19_H._jecorina | .....GHEIAWYN.....                                        |
| Chi18_20_H._jecorina | .....GNDIDWYN.....                                        |
| 01393_N._crassa_B    | .....GQETIAWYN.....                                       |
| 08394_N._crassa_B    | SGA.....GKEVAFYN.....                                     |
| XP_386145_G._zeae_B  | .....GRDIAWYN.....                                        |
| XP_382346_G._zeae_B  | .....GSRIAWYN.....                                        |
| MGG_04073_M._grisea  | .....GHEIAWYN.....                                        |
| MGG_01876_M._grisea  | .....GGSIEFYN.....                                        |
| 01513_S._sclerotioru | .....GNSIEWYN.....                                        |
| 03420_S._sclerotioru | RDPNTGAPMISFYN.....                                       |
| 05559_B._fuckeliana  | .....GSSIDWYN.....                                        |
| 07854_B._fuckeliana  | RDPDTGTPMISFYN.....                                       |
| 06595_C._immitis_B   | .....GSKISWYN.....                                        |
| AN8245_E._nidulans_B | .....AGSIAWYN.....                                        |
| 236861_L._bicolor_B  | .....GDSIDWYN.....                                        |
| 185397_L._bicolor_B  | .....GDAIDWYN.....                                        |
| UM02758_U._maydis_B  | .....GDLIDWYN.....                                        |
| 02351_F._neoformans  | .....GDTIDFYS.....                                        |
| Chi18_18_H._jecorina | YNN.....                                                  |
| ZP_01159542_Photobac | YNN...GGLANPYTSG.....VAPEGSVDMMVASVKMLVEGFELADGSQ...FSPLR |
| ZP_01234779_V._angus | YNN...GGLANPYTSG.....VAPEGSVDMMVASVKMLVEGFELADGSQ...FAPLR |
| NP_231586_V._cholera | YNN...GGLPNPYTPS.....AAPEGSVDMMVAQSKMLIEGFELANGTR...FEPLR |
| AAO10239_V._vulnific | YNN...GGLPNPYLPG.....AAPEGSVDMMVAQSKMLIEGFELADGTR...FEPLR |
| NP_902605_C._violace | YNN...GGLYTPYSTG.....VLAEGSADMLVGGSKMLIEGFPIANGASGSFKGLR  |
| NP_980050_B._cereus  | YNA...GSGIGMDGN.....NYNQGTADYEVAMADMLLHGFPVGGNANNMFPALR   |
| 634143_M._xanthus    | YNT...GTVMALDGR.....AYAQSTPDFHVAMAEMLLQGFVGGNTGAMFPGLR    |
| ChiA_S._coelicolor   | YNS...GTMLGCDGK.....VYAQGTVDFLTALACIQLE.....G...GLA       |
| YP_527176.1_S._degra | YNN...GGILSPYNPQ.....TFPAGSVDMMVASARMLIEGFNTGDGGY...FQGLR |
| YP_436543_B_H._cheju | YNS...GPIVGLDDQ.....YHTMGTADFHVAMTDMLLAGFPVQKDPNMMFPALK   |
| ChiB_S._coelicolor   | YNS...GSIMGLDNQ.....YHSMGGADFHIAMTDMLLTGFPVAGDANNVFPPLR   |
| YP_432187_H._chejuen | YNS...GCMLGLDGK.....CYSVSTGDFHVAMAEMLLAGFPVGGNANNRFPPLP   |
| ZP_01353924_C._phyto | YNS...GSMLGQDGK.....VYSQGSVDFTALAAIQLE.....N...GLR        |
| ZP_00742457_B._thuri | YNA...GSGIGMDGN.....NYNQGTADYEVAMADMLLHGFPVGGNANNIFPALR   |
| ZP_01430879_S._tropi | YNS...GAMLGCDQQF.....AYSQGTVNFIVALACIQLE.....A...GLR      |
| ChiJ_S._coelicolor   | YN....GSMYGCAGD.....SYSAGTVQGFTAQTDCLDKGLVIQG.TT...VRVP   |
| Chi18_15_H._jecorina | YN....GDMYGCAGD.....SYAAGTVAGFIAQTDCLNNGLTIQG.TT...FKVP   |

YP\_349297\_P.\_fluores YNQGGDGVVWPEANNNGA.....WIAQNNDTMKEDFLYYLTESLVT...GTRGFTKIP  
 NP\_719615\_S.\_oneiden YNQGGDGIYIEGIG.....WIAQNNDSLKQEFYIHISDALVN...GTNGFTKIP  
 ZP\_01236292\_V.\_angus YNQGGDGVVYEGIG.....WIAQSKDELKEEFYYMSDSLIN...GTRGFTKIP  
 ChiC\_S.\_marcescens YNQGGDGIWVDELN....A.....WITQNNDAMKEDFLYYLTESLVT...GTRGYAKIP  
 YP\_237842\_P.\_syringa YNQGGDGIWVDELN....L.....WVTQNNDAAHKEFLYYLTDSLH...GTRGFTKIP  
 YP\_608169\_P.\_entomop YNQGGDGLWVEEANNRGA.....WIAQNNDAMKEDFLYYMTESLVS...GTRGFTKIP  
 NP\_814153\_E.\_faecali YNQGGDGVWVDEIM....T.....WVAQSNDAKLYEFYYMSDSLH...GTRGYLQIP  
 YP\_014504\_L.\_monocyt YNQGGDGVWVDETN....Q.....WIAQNNDTLKESFLYYMADSFIN...GTRGYLKIP  
 YP\_071855\_Y.\_pseudot YNQLGDGVHTDSGE.....FIAQSDNERKEDFLYYLTKNLVS...SSQKFINIP  
 YP\_053588\_M.\_florum YNGWGDGVLVETSEDAKKTGVQQNTYITNDNVDKRGEFYLLMSKYITSKPNNQNGFYQIP  
 NP\_471330\_L.\_innocua YNQGGDGVWVDETN....Q.....WIAQNNDTLKESFLYYMADSFIN...GTRGYLKIP  
 ZP\_01245639\_B\_F.\_joh YNT...GGENGLDGQY.....YGTAKKSNMVTALTDMVIKGYNIAS.TGMRFDGLP

|                      | 430                                                         | 440 | 450 | 460 | 470 | 480 |
|----------------------|-------------------------------------------------------------|-----|-----|-----|-----|-----|
| 05455_B._fuckeliana  | .... .... .... .... .... .... .... .... .... .... .... .... |     |     |     |     |     |
| 14944_B._fuckeliana  | .....                                                       |     |     |     |     |     |
| 13155_S._sclerotioru | .....                                                       |     |     |     |     |     |
| 08695_S._sclerotioru | .....                                                       |     |     |     |     |     |
| 11212_S._sclerotioru | .....                                                       |     |     |     |     |     |
| EAA72615_G._zeae     | .....                                                       |     |     |     |     |     |
| 02184_N._crassa      | .....                                                       |     |     |     |     |     |
| 04500_N._crassa      | .....                                                       |     |     |     |     |     |
| MGG_03599_M._grisea  | .....                                                       |     |     |     |     |     |
| MGG_01333_M._grisea  | .....                                                       |     |     |     |     |     |
| 16099_R._oryzae      | .....                                                       |     |     |     |     |     |
| 10112_R._oryzae      | .....                                                       |     |     |     |     |     |
| 04523_R._oryzae      | .....                                                       |     |     |     |     |     |
| 11152_R._oryzae      | .....                                                       |     |     |     |     |     |
| 08153_R._oryzae      | .....                                                       |     |     |     |     |     |
| NP_594130_S._pombe   | .....                                                       |     |     |     |     |     |
| 00864_P._nodorum     | .....                                                       |     |     |     |     |     |
| 08680_P._nodorum     | .....                                                       |     |     |     |     |     |
| AN8241_E._nidulans   | .....                                                       |     |     |     |     |     |
| AN8217_E._nidulans   | .....                                                       |     |     |     |     |     |
| Chi18_14_H._jecorina | .....                                                       |     |     |     |     |     |
| Chi18_16_H._jecorina | .....                                                       |     |     |     |     |     |
| Chi18_12_H._jecorina | .....                                                       |     |     |     |     |     |
| Chi18_17_H._jecorina | .....                                                       |     |     |     |     |     |
| Chi18_13_H._jecorina | .....                                                       |     |     |     |     |     |
| 04407.1_C._cinereus  | .....                                                       |     |     |     |     |     |
| 6412_P._chrysosporiu | .....                                                       |     |     |     |     |     |
| 2991_P._chrysosporiu | .....                                                       |     |     |     |     |     |
| 40899_P._chrysospori | .....                                                       |     |     |     |     |     |
| BAA21861.1_A._thalia | .....                                                       |     |     |     |     |     |
| 07348_C._immitis     | .....                                                       |     |     |     |     |     |
| XP_452410_K._lactis  | .....                                                       |     |     |     |     |     |
| CTS1_S._cerevisiae   | .....                                                       |     |     |     |     |     |
| CHT1_C._albicans     | .....                                                       |     |     |     |     |     |
| CHT3_C._albicans     | .....                                                       |     |     |     |     |     |
| CHT2_C._albicans     | .....                                                       |     |     |     |     |     |
| 05283_L._elongisporu | .....                                                       |     |     |     |     |     |
| 03890_L._elongisporu | .....                                                       |     |     |     |     |     |
| 301747_L._bicolor    | .....                                                       |     |     |     |     |     |
| CAC07216_M._anisopli | .....                                                       |     |     |     |     |     |
| Chit30_M._anisopliae | .....                                                       |     |     |     |     |     |
| AAG25709_M._domestic | .....                                                       |     |     |     |     |     |
| ABA26457_C._lanatus  | .....                                                       |     |     |     |     |     |
| CAJ43737_C._arabica  | .....                                                       |     |     |     |     |     |
| ConcanaValinB_C._ens | .....                                                       |     |     |     |     |     |
| Hevamine_H._brasilie | .....                                                       |     |     |     |     |     |
| Q8L5C6_T._aestivum   | .....                                                       |     |     |     |     |     |



Q53NL5\_O.\_sativa .....  
Chi18\_19\_H.\_jecorina .AQFYCG.....  
Chi18\_20\_H.\_jecorina .TQFYSG.....  
01393\_N.\_crassa\_B .TQFYCG.....  
08394\_N.\_crassa\_B .CQFYSG.....  
XP\_386145\_G.\_zeae\_B .TQFYCG.....  
XP\_382346\_G.\_zeae\_B .TQFYCG.....  
MGG\_04073\_M.\_grisea .TQFYCG.....  
MGG\_01876\_M.\_grisea .AQFYNG.....  
01513\_S.\_sclerotioru .TQFYCG.....  
03420\_S.\_sclerotioru .AQFTNG.....  
05559\_B.\_fuckeliana .TQFYCG.....  
07854\_B.\_fuckeliana .AQFTNG.....  
06595\_C.\_immitis\_B .VQFYNG.....  
AN8245\_E.\_nidulans\_B .TQFYNG.....  
236861\_L.\_bicolor\_B .TQFYSG.....  
185397\_L.\_bicolor\_B .AQFYSG.....  
UM02758\_U.\_maydis\_B .VQFYNQ.....  
02351\_F.\_neoformans .VQFYNQ.....  
Chi18\_18\_H.\_jecorina .....  
ZP\_01159542\_Photobac DDQVAIGLPSGSSSAN.SGQAPTQNIIDALDCVTKGSSCG..SVVPTK..LYPNFGGVMT  
ZP\_01234779\_V.\_angus DDQVAIGLPSGPSSAN.SGQAPTQNIIDALDCVTKGSSCG..SVVPTK..LYPNFGGIMT  
NP\_231586\_V.\_cholera DDQVAIGLPSGPSSAN.SGQAPTQNIIDALDCVTKGTRCG..TIKPAF..AYPNYAGVMT  
AAO10239\_V.\_vulnific DDQVAIGLPSGPSSAN.SGQAPTQNIIDALDCLTLGTKCS..TVKPAF..NYPNFGGVT  
NP\_902605\_C.\_violace PDQVAFGVPSGRSSAN.SGFVTADTVAKALTCLTTLQCG..SVKPAQ..AYPAFRGVT  
NP\_980050\_B.\_cereus SDQVMIGLPAAPAAAPS.GGYISPTMKKALDYIIKGIPFGG.KYKLSNESGYPAFRGLMS  
634143\_M.\_xanthus PDQVLIIGLPSPPQAAG.GGYTTPANVHKALDYLLKGQSFSGG.TYVLRNPAGYPGFKGLMT  
ChiA\_S.\_coelicolor PSQVGLGLPASTRAAG.GGYVSPSVVNAALDCLTKATNCG..SFKPSK..TYPDLRGAMT  
YP\_527176.1\_S.\_degra PDQVSLGLPSGPSSAG.SGLATNQAIMDALDCITRGTHCG..TIDAGG..IYPSFNGVMT  
YP\_436543\_B\_H.\_cheju QSQIAIGLPAASNAGG..GFTSVQDVQTDALDCLMKKENC..TYQPKG..VYPNMRGLMT  
ChiB\_S.\_coelicolor PDQVAIGMPASTQAGN..GHVSPAETVKALNCLTKKTDG..SYATHG..TWPDLRGLMT  
YP\_432187\_H.\_chejuen AEKVAIGLPASTSAAG.SGYTLPSVVHQAVNYLVKGQSFSGG.SYQLQNPGEYPGFKGLMT  
ZP\_01353924\_C.\_phyto PDQVGLGLPASTKGAG.SGYVAPSVVNAALDCLTKGTNGG..SYKPPK..TYPTLRGAMT  
ZP\_00742457\_B.\_thuri SDQVIIIGLPAAPAAAPS.GGYISPTMKKALDYIIKGIPFGG.KYKLSNQSGYPAFRGLMS  
ZP\_01430879\_S.\_tropi PDQVGLGLPAGPGAAG.GGIVAPSVVNAALDCLTRGTSCG..SFQPPR..TYSGLRGAMT  
ChiJ\_S.\_coelicolor YDKQVPGLPAQPGAGG..GYMSPSPVSQAWNHYN.....G.....ALKGLMT  
Chi18\_15\_H.\_jecorina YSMQVPGLPAQSGAGG..GYMSPSLVGQAWDHYN.....G.....ALKGLMT  
YP\_349297\_P.\_fluores ADKFVIGLPAANVDAAATGYVIDKTVVGNAMKRLAVKG.....HPIKGLMT  
NP\_719615\_S.\_oneiden HDKLVFGIPTNIDAAATGYVSDPNALFAAFEQLKNQG.....QPLRGLMT  
ZP\_01236292\_V.\_angus HDKLVFGIPTNIDAAATGYVQDPQDLFNAFKRLEAQS.....QPLRGVMT  
ChiC\_S.\_marcescens AAKFVIGLPSNNDAAATGYVIDKQAVYNFAFRLDAKS.....LSIKGLMT  
YP\_237842\_P.\_syringa ANRLAIGLPTNNDAAATGYVINPDDVKYALDTLQADG.....NPIRGLMT  
YP\_608169\_P.\_entomop ADKFAIGLPAANVDAAATGYVINPTAVSNFAKRLYAKG.....ISIKGLMT  
NP\_814153\_E.\_faecali NDKLVIGLPAANRDAAGSGYVVEATPVAKTFDQLAKDG.....NPIRGLMT  
YP\_014504\_L.\_monocyt ANKFVFGLPAANVDAAATGYVKDPQIVKNVFTRLQAKG.....TPVKGIMT  
YP\_071855\_Y.\_pseudot ADKFVMGLPANNDAAANGYVIDKKDVHNAFARLDAAG.....LSIRGLMT  
YP\_053588\_M.\_florum ADKFIIGASTN.EPAGRG.AGSKEAFNKAYNLLNSDG.....IKIRGLMT  
NP\_471330\_L.\_innocua ANKFVFGLPAANVDAAATGYVKDPQIVQNVFNRLQAKG.....TPVKGVT  
ZP\_01245639\_B\_F.\_joh ASKVLIALPACPSAAG.SGYLTPTEGINAMHYLRTGTTFSGRITYTMQPGGYPSLRGLMT

.....|.  
05455\_B.\_fuckeliana .....  
14944\_B.\_fuckeliana .....  
13155\_S.\_sclerotioru .....  
08695\_S.\_sclerotioru .....  
11212\_S.\_sclerotioru .....  
EAA72615\_G.\_zeae .....  
02184\_N.\_crassa .....  
04500\_N.\_crassa .....  
MGG\_03599\_M.\_grisea .....  
MGG\_01333\_M.\_grisea .....

|                      |        |
|----------------------|--------|
| 16099_R._oryzae      | .....  |
| 10112_R._oryzae      | .....  |
| 04523_R._oryzae      | .....  |
| 11152_R._oryzae      | .....  |
| 08153_R._oryzae      | .....  |
| NP_594130_S._pombe   | .....  |
| 00864_P._nodorum     | .....  |
| 08680_P._nodorum     | .....  |
| AN8241_E._nidulans   | .....  |
| AN8217_E._nidulans   | .....  |
| Chi18_14_H._jecorina | .....  |
| Chi18_16_H._jecorina | .....  |
| Chi18_12_H._jecorina | .....  |
| Chi18_17_H._jecorina | .....  |
| Chi18_13_H._jecorina | .....  |
| 04407.1_C._cinereus  | .....  |
| 6412_P._chrysosporiu | .....  |
| 2991_P._chrysosporiu | .....  |
| 40899_P._chrysospori | .....  |
| BAA21861.1_A._thalia | .....  |
| 07348_C._immitis     | .....  |
| XP_452410_K._lactis  | .....  |
| CTS1_S._cerevisiae   | .....  |
| CHT1_C._albicans     | .....  |
| CHT3_C._albicans     | .....  |
| CHT2_C._albicans     | .....  |
| 05283_L._elongisporu | .....  |
| 03890_L._elongisporu | .....  |
| 301747_L._bicolor    | .....  |
| CAC07216_M._anisopli | .....  |
| Chit30_M._anisopliae | .....  |
| AAG25709_M._domestic | .....  |
| ABA26457_C._lanatus  | .....  |
| CAJ43737_C._arabica  | .....  |
| ConcanavalinB_C._ens | .....  |
| Hevamine_H._brasilie | .....  |
| Q8L5C6_T._aestivum   | .....  |
| Q53NL5_O._sativa     | .....  |
| Chi18_19_H._jecorina | .....  |
| Chi18_20_H._jecorina | .....  |
| 01393_N._crassa_B    | .....  |
| 08394_N._crassa_B    | .....  |
| XP_386145_G._zeae_B  | .....  |
| XP_382346_G._zeae_B  | .....  |
| MGG_04073_M._grisea_ | .....  |
| MGG_01876_M._grisea_ | .....  |
| 01513_S._sclerotioru | .....  |
| 03420_S._sclerotioru | .....  |
| 05559_B._fuckeliana_ | .....  |
| 07854_B._fuckeliana_ | .....  |
| 06595_C._immitis_B   | .....  |
| AN8245_E._nidulans_B | .....  |
| 236861_L._bicolor_B  | .....  |
| 185397_L._bicolor_B  | .....  |
| UM02758_U._maydis_B  | .....  |
| 02351_F._neoformans_ | .....  |
| Chi18_18_H._jecorina | .....  |
| ZP_01159542_Photobac | WSINWD |
| ZP_01234779_V._angus | WSINWD |
| NP_231586_V._cholera | WSINWD |
| AAO10239_V._vulnific | WSINWD |
| NP_902605_C._violace | WSINWD |

|                      |        |
|----------------------|--------|
| NP_980050_B._cereus  | WSINWD |
| 634143_M._xanthus    | WSINWD |
| ChiA_S._coelicolor   | WSTNWD |
| YP_527176.1_S._degra | WSINWD |
| YP_436543_B_H._cheju | WSINWD |
| ChiB_S._coelicolor   | WSINWD |
| YP_432187_H._chejuen | WSINWD |
| ZP_01353924_C._phyto | WSINWD |
| ZP_00742457_B._thuri | WSINWD |
| ZP_01430879_S._tropi | WSVNWD |
| ChiJ_S._coelicolor   | WSLNWD |
| Chi18_15_H._jecorina | WSINWD |
| YP_349297_P._fluores | WSVNWD |
| NP_719615_S._oneiden | WSVNWD |
| ZP_01236292_V._angus | WSINWD |
| ChiC_S._marcescens   | WSINWD |
| YP_237842_P._syringa | WSVNWD |
| YP_608169_P._entomop | WSVNWD |
| NP_814153_E._faecali | WSANWD |
| YP_014504_L._monocyt | WSVNWD |
| YP_071855_Y._pseudot | WSIDWD |
| YP_053588_M._florum  | WSILFD |
| NP_471330_L._innocua | WSVNWD |
| ZP_01245639_B_F._joh | WSVNWD |
