# Supplementary material
Source: publisher figshare collection journal article supplement (https://karger.figshare.com/articles/dataset/_/5120446)
Supplement: Supplementary file 3 [file 1]

Figure S3. Amino-acid alignment of cluster C GH18 catalytic domains.

|                      |          |          |          |          |            |             |
|----------------------|----------|----------|----------|----------|------------|-------------|
|                      | 10       | 20       | 30       | 40       | 50         | 60          |
| 621070_B._cenocepaci | TLAFVVG  | ..NGCVP  | SWGGVQPI | NGASG    | LLTALST    | SIASYRAKGG  |
| ZP_01331104_B._pseud | MLAFVVS  | GG.NQCTP | SWGGVQPI | NGATG    | DLLDKIATS  | SVTAYRAKGG  |
| ZP_00739603_B._thuri | TLSFIVAD | ..KNGNP  | VWGGSH   | T.PIGDGN | LD.....    | DQIKQIRKIG  |
| ChiK_S._coelicolor   | NLAFAISS | G.DDCVP  | WRWNGVQ  | DIDDA    | S.VAS..... | RVEKLRESG   |
| YP_124481_L._pneumop | HLAFITDS | ..GQCQP  | PAWGAQ   | QNYSV    | AKGWGK     | .....KQFDTL |
| NP_901110_C._violace | TLAFVVA  | K..GGCAP | SWGGVLA  | IPGSGS   | DQQLSAIR   | NGINNFRGK   |
| ChiA_B_P._kodakarae  | TLAFVLY  | SS.VYNGP | AWAG..   | SIPLDA   | FVDE.....  | VKGLREAGG   |
| ZP_01137245_A._cellu | MLAFILAN | GS.SCSP  | AWDG.T   | NPVSSD   | TTVAN....  | VINQVRS     |
| ZP_00570566_Frankia_ | TLAFVVAG | G.GGCTP  | KWGGV    | DLTMD    | G.VPG..... | QIGRFREL    |
| ZP_00923356_E._coli  | TLAFVVS  | KDANTCL  | PTWGT    | AYGMH    | NYAQY      | SK.....IK   |
| ZP_01199781_X._autot | TLAFVLGT | G.PDQIG  | .WGGLG   | SIDND    | T.LANGTT   | ISSMVAAL    |
| ZP_01191795_M._flave | TLGFMQAT | P.DGKLA  | .WAGLS   | ALT      | PDSD       | FQARAINQ    |
| ChiH_S._coelicolor   | TMAFLQT  | ATPGS    | CPTPW    | NGDT     | SMPIAQ     | STFGA.....  |
|                      | 70       | 80       | 90       | 100      | 110        | 120         |
| 621070_B._cenocepaci | NGTPLMQ  | .....    | ACST...  | VPALKS   | AYQTVID    | TYGLTHID    |
| ZP_01331104_B._pseud | AGQPLMQ  | .....    | ACSS...  | VAALKG   | AYQTVID    | TYSLTHV     |
| ZP_00739603_B._thuri | NAGNIPG  | LADLAA   | AITD...  | VNKLK    | DAYKSV     | INTLHLTH    |
| ChiK_S._coelicolor   | SGTELA   | A.....   | ACGS...  | ASALAA   | YGTALD     | AAGSTRAD    |
| YP_124481_L._pneumop | SGTDIS   | .....    | YHCD...  | KNQLIN   | RFNQV      | VNQYHANV    |
| NP_901110_C._violace | NGTPLQQ  | .....    | ACTT...  | NASLQA   | AYQTVL     | DTYNLSR     |
| ChiA_B_P._kodakarae  | VGPYLQ   | C.....   | QAKT...  | PEQLAQ   | WYIQVI     | DYNTATYL    |
| ZP_01137245_A._cellu | AGTKLG   | Q.....   | VCSS...  | PQATAA   | AYQAVI     | DKYALKAI    |
| ZP_00570566_Frankia_ | SGTELAS  | .....    | ACGS...  | AGDLAA   | YRKVV      | DVYGVT      |
| ZP_00923356_E._coli  | NNAPLAA  | .....    | SCKN...  | VDDL     | MQHYD      | IVDNLNL     |
| ZP_01199781_X._autot | YGQEPAL  | .....    | SFTN...  | VAQLTA   | AYQSV      | MDKYNVT     |
| ZP_01191795_M._flave | SGTSLAQ  | .....    | WYAAH    | GLGPQ    | ALADAY     | AAVADTY     |
| ChiH_S._coelicolor   | TGTEIAD  | .....    | SCTD...  | VQQIAA   | AYEKV      | ITTYDVS     |
|                      | 130      | 140      | 150      | 160      | 170        | 180         |
| 621070_B._cenocepaci | QDTAAV   | ..ARNFQ  | AVAQLQ   | ADYAAK   | GKPLH      | VTLTLP      |
| ZP_01331104_B._pseud | QDSAAV   | ..ARNFQ  | AVAQLQ   | ADYAAK   | GKPLH      | VTLTLP      |
| ZP_00739603_B._thuri | AHPESI   | ..ERRSK  | AIALLO   | KELKAE   | GKDV       | KIGYTL      |
| ChiK_S._coelicolor   | TDTGSV   | ..ALRSE  | AIALLO   | .EQRDG   | ...LEVS    | FTLPVMP     |
| YP_124481_L._pneumop | NIPNLL   | ..QS.... | LKLFQ    | KEHP...  | DVLLS      | FTLPVMP     |
| NP_901110_C._violace | TDTAAN   | ..NRNFA  | VVAALQ   | KNYKAK   | GKTLH      | VSLTLP      |
| ChiA_B_P._kodakarae  | ADKLA    | .....    | DALLIV   | QRER     | PN...V     | RFSFTLP     |
| ZP_01137245_A._cellu | ENLTAV   | ..SNEVG  | AAQILQ   | ...RNNP  | GLYIS      | ITLPGTA     |
| ZP_00570566_Frankia_ | PDVAAN   | ..TRRAQ  | AIARLQ   | REAAAG   | GRPLE      | VSF         |
| ZP_00923356_E._coli  | ADQASI   | ..ERRNL  | AVKKVQ   | DKWKE    | GKDIA      | IWYTL       |
| ZP_01199781_X._autot | TNTAAS   | ..HLRNE  | ALVALE   | QANPD    | ...LT      | VSF         |
| ZP_01191795_M._flave | AEPASI   | ..ALNAQ  | ALRL     | LQQLR    | PD...L     | EIWYTL      |
| ChiH_S._coelicolor   | DNTAGI   | ..DRRNK  | AIKL     | VQDWA    | AANG       | RDL         |
|                      | 190      | 200      | 210      | 220      | 230        | 240         |
| 621070_B._cenocepaci | NAAIAN   | KTTFD    | AVNVM    | AMDYG    | PANID      | .....       |
| ZP_01331104_B._pseud | NAALANN  | VTLDA    | VNIMT    | MDYGP    | SGID       | .....       |
| ZP_00739603_B._thuri | QSAIKH   | DVDL     | NSVN     | IMTDY    | G.QQNQ     | Q.....      |
| ChiK_S._coelicolor   | ASANDH   | GVQV     | SAVN     | LMTM     | NYGES      | YTAD.....   |
| YP_124481_L._pneumop | TSAA     | TGLH     | FN.VN    | IMAM     | DYGP       | AYNGD       |
| NP_901110_C._violace | ASALAN   | GVALD    | TVNIM    | AMDY     | GQSN       | PN.....     |
| ChiA_B_P._kodakarae  | ETMAKK   | GVIV     | DRVN     | PMTD     | MYWTP      | PAN.....    |
| ZP_01137245_A._cellu | NTAKGL   | GFTPN    | NYSI     | MPFD     | GGFNG      | .....       |
| ZP_00570566_Frankia_ | ANAREN   | GVTV     | NAVNI    | AMDY     | GDAAP      | NP.....     |
| ZP_00923356_E._coli  | SDAKAK   | GVEL     | AGVNV    | MTDY     | GNAIC      | QSANT       |

ZP\_01199781\_X.\_autot AQAKADGVEIDTVNIMVMNYGAYYDSG.....D..MGKDAIDAAEATIAQLHQLG.....  
 ZP\_01191795\_M.\_flave RKAI EAGVTL DGVNIMAMDYGESAAPTS.GPNAKTMGAWAIQAAESTHAQLSTLYSGYG.  
 ChiH\_S.\_coelicolor ENAVKNGTKVDVVNLMTFDYYDNQQHD.....MARDTQTATQGLHDVLRARLHPGKS.

250 260 270 280 290 300  
 ....|....|....|....|....|....|....|....|....|....|....|....|....|  
 621070\_B.\_cenocepaci P.....KTNAQLWQMVGVTTPMIGVNDVQG.....ETFTLANAQTVLNAAIANG.  
 ZP\_01331104\_B.\_pseud P.....QTDAQLKQLVGVTTPMIGVNDVAG.....EIFTLANAQSVQTTAANN.  
 ZP\_00739603\_B.\_thuri .....DSDIWKMIAVTPMIGKNDTQN.....ETFTLNNAKELFQFAKEKG.  
 ChiK\_S.\_coelicolor .....DADAWRGMALTSMLGVNDVAG.....ETFTLADAAEVRAFAEEKG.  
 YP\_124481\_L.\_pneumop .....PEALWQMI E VTPMIGVNDVNT.....EQFTLSNAAQLKQFAQKNL.  
 NP\_901110\_C.\_violace T.....LTDAQLWQKVGVTTPMVGLNDTQP.....ETFTVDNAKDLYGMANSNR.  
 ChiA\_B\_P.\_kodakarae .....DDEIWGMIGLTPMIGTNDKKS.....VFSLQDAEKLVDWAIQHK.  
 ZP\_01137245\_A.\_cellu .....SATAWAHEGISQMNGRSDTG.....EYFYQADFQSNLDFARSVG.  
 ZP\_00570566\_Frankia\_ .....DAQAWGRVAVTPMIGVNDVAS.....EVFTLADARRLVRFASEVD.  
 ZP\_00923356\_E.\_coli .....DAEIDAMMGTTTPMVGNDVQG.....EVFYLSDARLVMQDAQKRN.  
 ZP\_01199781\_X.\_autot .....LDAK..VAITPMIGQNDVPG.....EVFTLDDARQLLDYAEENDH  
 ZP\_01191795\_M.\_flave .....QTFAWNQLGVTPMIGVNDVLT.....EVFTVADSQALED FARARG.  
 ChiH\_S.\_coelicolor .....SADLW H M I G V I E M I G V D D F G P.....AETFTLDNARTVYDWALDQG.

310  
 ....|....|....  
 621070\_B.\_cenocepaci ..YGFFGNWSVGRD  
 ZP\_01331104\_B.\_pseud ..YGFVGIWSITRD  
 ZP\_00739603\_B.\_thuri ..IGEISMWSVYRD  
 ChiK\_S.\_coelicolor ..IAWVSMWAAFRD  
 YP\_124481\_L.\_pneumop ..LGGLSMWSFNRD  
 NP\_901110\_C.\_violace ..FGLLSMWSISR  
 ChiA\_B\_P.\_kodakarae ..IRSLAFWSVDRD  
 ZP\_01137245\_A.\_cellu ..LGRYTFWSVNRD  
 ZP\_00570566\_Frankia\_ ..LAWLSMWSLTRD  
 ZP\_00923356\_E.\_coli ..LGMVGIWSIARD  
 ZP\_01199781\_X.\_autot ..IAYIAMWSLGRD  
 ZP\_01191795\_M.\_flave ..LGMLSMWSLNRD  
 ChiH\_S.\_coelicolor ..INTLSFWALQRD
