# Supplementary material
Source: publisher figshare collection journal article supplement (https://karger.figshare.com/articles/dataset/_/5120446)
Supplement: Supplementary file 4 [file 1]

## Supplementary information

Table S1. Bacterial species and strains containing GH18-genes.

Table S2. Summary of the number GH18s examined in the current work.

Table S3. Domain-structure of all GH18s examined in the current work.

## Supplementary tables

Table S1

Bacterial species and strains containing GH18-genes

| Phylum                            | Class/Order            | Species/Strain                         |
|-----------------------------------|------------------------|----------------------------------------|
| Actinobacteria 12/41 (29%)        |                        | Acidothermus cellulolyticus 11B        |
|                                   |                        | Arthrobacter sp. FB24                  |
|                                   |                        | Frankia sp. EAN1pec                    |
|                                   |                        | Mycobacterium flavescensPYR-GCK        |
|                                   |                        | Mycobacterium vanbaalenii PYR-1        |
|                                   |                        | Nocardioides sp. JS614                 |
|                                   |                        | Salinispora tropica CNB-440            |
|                                   |                        | Streptomyces avermitilis MA-4680       |
|                                   |                        | Streptomyces coelicolor A(3)2          |
|                                   |                        | Symbiobacterium thermophilum IAM 14863 |
|                                   |                        | Thermobifida fusca YX                  |
|                                   |                        | Marine actinobacterium PHSC20C1        |
| Bacteroidetes/Chlorobi 4/27 (15%) |                        | Bacteroides thetaiotaomicron VPI-5482  |
|                                   |                        | Flavobacteriales bacterium HTCC2170    |
|                                   |                        | Flavobacterium johnsoniae UW101        |
|                                   |                        | Salinibacter ruber DSM 13855           |
| Cyanobacteria 4/27 (15%)          |                        | Nostoc punctiforme PCC 73102           |
|                                   |                        | Synechococcus sp. RS9916               |
|                                   |                        | Synechococcus sp. RS9917               |
|                                   |                        | Synechococcus sp. WH 7805              |
| Firmicutes 40/126 (32%)           | Bacillales 23/42 (55%) | Bacillus anthracis str. A2012          |

Bacillus anthracis str. Ames  
Bacillus cereus ATCC 10987  
Bacillus cereus ATCC 14579  
Bacillus cereus E33L  
Bacillus cereus G9241  
Bacillus cereus subsp. cytotoxis NVH 391-98  
Bacillus clausii KSM-K16  
Bacillus halodurans C-125  
Bacillus licheniformis ATCC 14580  
Bacillus sp. NRRL B-14911  
Bacillus subtilis subsp. subtilis str. 168  
Bacillus thuringiensis serovar israelensis ATCC 35646  
Bacillus thuringiensis serovar konkukian str. 97-27  
Bacillus weihenstephanensis KBAB4  
Geobacillus kaustophilus HTA426  
Listeria innocua Clip11262  
Listeria monocytogenes EGD-e  
Listeria monocytogenes str. 1/2a F6854  
Listeria monocytogenes str. 4b F2365  
Listeria monocytogenes str. 4b H7858  
Listeria welshimeri serovar 6b str. SLCC5334  
Oceanobacillus iheyensis HTE831

Clostridiales 13/22 (59%)

Clostridium acetobutylicum ATCC 824  
Clostridium beijerincki NCIMB 8052  
Clostridium difficile QCD-32g58  
Clostridium phytofermentans ISDg  
Clostridium sp. OhILAs  
Clostridium thermocellum ATCC 27405  
Desulfitobacterium hafniense DCB-2  
Desulfitobacterium hafniense Y51  
Desulfotomaculum reducens MI-1

|                                  |                                                     |
|----------------------------------|-----------------------------------------------------|
|                                  | Halothermothrix orenii H 168                        |
|                                  | Syntrophomonas wolfei subsp. wolfei str. Goettingen |
|                                  | Thermoanaerobacter ethanolicus X514                 |
|                                  | Thermoanaerobacter tengcongensis                    |
| Lactobacillales 3/46 (7%)        |                                                     |
|                                  | Enterococcus faecalis V583                          |
|                                  | Lactococcus lactis subsp. cremoris SK11             |
|                                  | Lactococcus lactis subsp. lactis I11403             |
| <u>Mollicutes</u> 1/16 (6%)      |                                                     |
|                                  | Mesoplasma florum L1                                |
| Proteobacteria 67/350 (19%)      |                                                     |
| Alpha 4/89 (4%)                  |                                                     |
| Alpha/Rickettsiales 3/25 (12%)   |                                                     |
|                                  | Rickettsia bellii OSU 85-389                        |
|                                  | Rickettsia bellii RML369-C                          |
|                                  | Rickettsia felis URRWXC12                           |
| Alpha/Others 1/59 (2%)           |                                                     |
|                                  | Xanthobacter autotrophicus Py2                      |
| Beta 14/55 (25%)                 |                                                     |
| Beta/Burkholderiales 13/36 (36%) |                                                     |
|                                  | Burkholderia cenocepacia AU 1054                    |
|                                  | Burkholderia cepacia AMMD                           |
|                                  | Burkholderia dolosa AUO158                          |
|                                  | Burkholderia mallei ATCC 23344                      |
|                                  | Burkholderia pseudomallei 1710b                     |
|                                  | Burkholderia pseudomallei 668                       |
|                                  | Burkholderia pseudomallei K96243                    |
|                                  | Burkholderia sp. 383                                |
|                                  | Burkholderia thailandensis E264                     |
|                                  | Burkholderia xenovorans LB400                       |
|                                  | Ralstonia solanacearum GMI1000                      |

|                             |                                                                           |
|-----------------------------|---------------------------------------------------------------------------|
|                             | <i>Ralstonia solanacearum</i> UW551                                       |
|                             | <i>Acidovorax avenae</i> subsp. <i>Citrulli</i> AAC00-1                   |
| Beta/Neisseriales 1/4 (25%) |                                                                           |
|                             | <i>Chromobacterium violaceum</i> ATCC 12472                               |
| Delta 2/19 (11%)            |                                                                           |
|                             | <i>Myxococcus xanthus</i> DK 1622                                         |
|                             | <i>Stigmatella aurantiaca</i> DW4/3-1                                     |
| Gamma 67/161 (42%)          |                                                                           |
| Gamma/Enterobacteriales     |                                                                           |
| 17/52 (33%)                 |                                                                           |
|                             | <i>Escherichia coli</i> 101-1                                             |
|                             | <i>Escherichia coli</i> 536                                               |
|                             | <i>Escherichia coli</i> 53638                                             |
|                             | <i>Escherichia coli</i> CFT073                                            |
|                             | <i>Escherichia coli</i> F11                                               |
|                             | <i>Escherichia coli</i> HS                                                |
|                             | <i>Escherichia coli</i> K12                                               |
|                             | <i>Escherichia coli</i> UTI89                                             |
|                             | <i>Escherichia coli</i> W3110                                             |
|                             | <i>Photobacterium luminescens</i> subsp. <i>laumondii</i> TTO1            |
|                             | <i>Salmonella enterica</i> subsp. <i>enterica</i> serovar Typhi Ty2       |
|                             | <i>Salmonella enterica</i> subsp. <i>enterica</i> serovar Typhi str. CT18 |
|                             | <i>Salmonella typhimurium</i> LT2                                         |
|                             | <i>Sodalis glossinidius</i> str. 'morsitans'                              |
|                             | <i>Yersinia bercovieri</i> ATCC 43970                                     |
|                             | <i>Yersinia pseudotuberculosis</i> IP 31758                               |
|                             | <i>Yersinia pseudotuberculosis</i> IP 32953                               |
| Gamma/Pseudomonadales       |                                                                           |
| 12/15 (80%)                 |                                                                           |
|                             | <i>Pseudomonas aeruginosa</i> 2192                                        |
|                             | <i>Pseudomonas aeruginosa</i> C3719                                       |
|                             | <i>Pseudomonas aeruginosa</i> PA7                                         |

|                                   |                                             |
|-----------------------------------|---------------------------------------------|
|                                   | Pseudomonas aeruginosa PACS2                |
|                                   | Pseudomonas aeruginosa PAO1                 |
|                                   | Pseudomonas aeruginosa UCBPP-PA14           |
|                                   | Pseudomonas entomophila L48                 |
|                                   | Pseudomonas fluorescens Pf-5                |
|                                   | Pseudomonas fluorescens PfO-1               |
|                                   | Pseudomonas syringae pv. phaseolicola 1448A |
|                                   | Pseudomonas syringae pv. syringae B728a     |
|                                   | Pseudomonas syringae pv. tomato str. DC3000 |
| Gamma/Vibrionales 18/18<br>(100%) |                                             |
|                                   | Photobacterium profundum 3TCK               |
|                                   | Photobacterium profundum SS9                |
|                                   | Photobacterium sp. SKA34                    |
|                                   | Vibrio alginolyticus 12G01                  |
|                                   | Vibrio angustum S14                         |
|                                   | Vibrio cholerae MO10                        |
|                                   | Vibrio cholerae O1 biovar eltor str. N16961 |
|                                   | Vibrio cholerae O395                        |
|                                   | Vibrio cholerae RC385                       |
|                                   | Vibrio cholerae V51                         |
|                                   | Vibrio cholerae V52                         |
|                                   | Vibrio fisheri ES114                        |
|                                   | Vibrio parahaemolyticus RIMD 2210633        |
|                                   | Vibrio sp. Ex25                             |
|                                   | Vibrio sp. MED222                           |
|                                   | Vibrio splendidus 12B01                     |
|                                   | Vibrio vulnificus CMCP6                     |
|                                   | Vibrio vulnificus YJ016                     |
| Gamma/Others 20/55 (36%)          |                                             |
|                                   | Coxiella burnetii Dugway 7E9-12             |
|                                   | Coxiella burnetii RSA 331                   |

|                               |                                                                |
|-------------------------------|----------------------------------------------------------------|
|                               | Coxiella burnetii RSA 493                                      |
|                               | Francisella tularensis subsp. holarctica                       |
|                               | Francisella tularensis subsp. holarctica OSU18                 |
|                               | Francisella tularensis subsp. tularensis SCHU S4               |
|                               | Hahella chejuensis KCTC 2396                                   |
|                               | Legionella pneumophila str. Lens                               |
|                               | Legionella pneumophila str. Paris                              |
|                               | Legionella pneumophila subsp. pneumophila str. Philadelphia 1  |
|                               | Pseudoalteromonas tunicata D2                                  |
|                               | Reinekea sp. MED297                                            |
|                               | Saccharophagus degradans 2-40                                  |
|                               | Shewanella baltica OS155                                       |
|                               | Shewanella baltica OS195                                       |
|                               | Shewanella denitrificans OS217                                 |
|                               | Shewanella oneidensis MR-1                                     |
|                               | Shewanella sp. ANA-3                                           |
|                               | Shewanella sp. MR-4                                            |
|                               | Shewanella sp. MR-7                                            |
| <u>Spirochaetes</u> 2/9 (22%) |                                                                |
|                               | Leptospira interrogans serovar Copenhageni str. Fiocruz L1-130 |
|                               | Leptospira interrogans serovar Lai str. 56601                  |
| Acidobacteria 2/2 (100%)      |                                                                |
|                               | Acidobacteria bacterium Ellin345                               |
|                               | Solibacter usitatus Ellin6076                                  |
| Chloroflexi 3/6 (50%)         |                                                                |
|                               | Chloroflexus aurantiacus J-10-fl                               |
|                               | Herpetosiphon aurantiacus ATCC 23779                           |
|                               | Roseiflexus sp. RS-1                                           |

---

Table S2

Summary of the number of GH18s examined in the current work.

| Organism                                          | Group         | Gene no. | GH18 domain no. |
|---------------------------------------------------|---------------|----------|-----------------|
| Virus                                             |               |          |                 |
| <i>Orgyia pseudotsugata</i> MNPV <sup>a</sup>     | Baculoviridae | 1        | 1               |
| <i>Agrotis segetum</i> GV <sup>a</sup>            | Baculoviridae | 1        | 1               |
| <i>Agrotis segetum</i> GV <sup>a</sup>            | Baculoviridae | 1        | 1               |
| <i>Bombyx mori</i> NPV <sup>a</sup>               | Baculoviridae | 1        | 1               |
| <i>Choristoneura fumiferana</i> MNPV <sup>a</sup> | Baculoviridae | 1        | 1               |
| <i>Spodoptera exigua</i> NPV <sup>a</sup>         | Baculoviridae | 1        | 1               |
| <i>Helicoverpa zea</i> SNPV <sup>a</sup>          | Baculoviridae | 1        | 1               |
| Animal                                            |               |          |                 |
| <i>Caenorhabditis elegans</i>                     | Rhabditida    | 33       | 35              |
| <i>Drosophila melanogaster</i>                    | Diptera       | 18       | 22              |

Plant

|                                          |                     |          |          |
|------------------------------------------|---------------------|----------|----------|
| <i>Arabidopsis thaliana</i>              | Brassicales         | 10       | 10       |
| <i>Malus domestica</i> <sup>a</sup>      | <b>Rosales</b>      | <b>1</b> | <b>1</b> |
| <i>Citrullus lanatus</i> <sup>a</sup>    | <b>Cucurbitales</b> | <b>1</b> | <b>1</b> |
| <i>Coffea arabica</i> <sup>a</sup>       | <b>Gentianales</b>  | <b>1</b> | <b>1</b> |
| <i>Hevea brasiliensis</i> <sup>a</sup>   | <b>Malpighiales</b> | <b>1</b> | <b>1</b> |
| <i>Triticum aestivum</i> <sup>a</sup>    | <b>Poales</b>       | <b>1</b> | <b>1</b> |
| <i>Oryza sativa</i> <sup>a</sup>         | <b>Poales</b>       | <b>1</b> | <b>1</b> |
| <i>Canavalia ensiformis</i> <sup>a</sup> | <b>Fabales</b>      | <b>1</b> | <b>1</b> |

Bacteria

|                                        |                     |   |   |
|----------------------------------------|---------------------|---|---|
| <i>Rickettsia bellii</i> OSU 85-389    | Alphaproteobacteria | 1 | 1 |
| <i>Rickettsia bellii</i> RML369-C      | Alphaproteobacteria | 1 | 1 |
| <i>Xanthobacter autotrophicus</i> Py2  | Alphaproteobacteria | 2 | 2 |
| <i>Burkholderia cenocepacia</i> AU1054 | Betaproteobacteria  | 1 | 1 |
| <i>Burkholderia pseudomallei</i> S13   | Betaproteobacteria  | 1 | 1 |



|                                                                     |                            |          |          |
|---------------------------------------------------------------------|----------------------------|----------|----------|
| <i>Chromobacterium violaceum</i> ATCC12472                          | Betaproteobacteria         | 5        | 5        |
| <i>Escherichia coli</i> 101-1                                       | Gammaproteobacteria        | 1        | 1        |
| <i>Salmonella enterica</i> subsp. <i>enterica</i> serovar Typhi Ty2 | Gammaproteobacteria        | 1        | 1        |
| <i>Yersinia pseudotuberculosis</i> IP32953                          | Gammaproteobacteria        | 1        | 1        |
| <b><i>Serratia marcescens</i><sup>a</sup></b>                       | <b>Gammaproteobacteria</b> | <b>2</b> | <b>2</b> |
| <i>Hahella chejuensis</i> KCTC2396                                  | Gammaproteobacteria        | 6        | 7        |
| <i>Legionella pneumophila</i> Paris                                 | Gammaproteobacteria        | 2        | 2        |
| <i>Shewanella oneidensis</i> MR-1                                   | Gammaproteobacteria        | 1        | 1        |
| <i>Pseudomonas syringae</i> pv. <i>syringae</i> B728a               | Gammaproteobacteria        | 1        | 1        |
| <i>Pseudomonas fluorescens</i> PfO-1                                | Gammaproteobacteria        | 1        | 1        |
| <i>Pseudomonas entomophila</i> L48                                  | Gammaproteobacteria        | 1        | 1        |
| <i>Saccharophagus degradans</i> 2-40                                | Gammaproteobacteria        | 4        | 5        |
| <i>Photobacterium</i> sp. SKA34                                     | Gammaproteobacteria        | 8        | 8        |
| <i>Vibrio angustum</i> S14                                          | Gammaproteobacteria        | 8        | 8        |
| <i>Vibrio vulnificus</i> CMCP6                                      | Gammaproteobacteria        | 5        | 5        |
| <i>Vibrio cholerae</i> N16961                                       | Gammaproteobacteria        | 4        | 4        |

|                                                                     |                     |    |    |
|---------------------------------------------------------------------|---------------------|----|----|
| <i>Myxococcus xanthus</i> DK1622                                    | Deltaproteobacteria | 4  | 4  |
| <i>Streptomyces coelicolor</i> A3(2)                                | Actinobacteria      | 10 | 10 |
| <i>Symbiobacterium thermophilum</i> IAM14863                        | Actinobacteria      | 4  | 4  |
| <i>Acidothermus cellulolyticus</i> 11B                              | Actinobacteria      | 5  | 5  |
| <i>Salinispora tropica</i> CNB-440                                  | Actinobacteria      | 3  | 3  |
| <i>Frankia</i> sp. EAN1pec                                          | Actinobacteria      | 1  | 1  |
| <i>Mycobacterium flavescens</i> PYR-GCK                             | Actinobacteria      | 1  | 1  |
| <i>Streptococcus pyogenes</i> MGAS9429                              | Bacilli             | 1  | 1  |
| <i>Bacillus licheniformis</i> ATCC14580                             | Bacilli             | 5  | 5  |
| <i>Bacillus cereus</i> ATCC10987                                    | Bacilli             | 3  | 3  |
| <i>Bacillus thuringiensis</i> serovar <i>israelensis</i> ATCC 35646 | Bacilli             | 5  | 5  |
| <i>Listeria monocytogenes</i> 4b F2365                              | Bacilli             | 2  | 2  |
| <i>Listeria innocua</i> Clip11262                                   | Bacilli             | 2  | 2  |
| <i>Enterococcus faecalis</i> V583                                   | Bacilli             | 3  | 3  |
| <i>Clostridium phytofermentans</i> ISDg                             | Clostridia          | 5  | 5  |
| <i>Mesoplasma florum</i> L1                                         | Mollicutes          | 1  | 1  |

|                                        |                       |    |    |
|----------------------------------------|-----------------------|----|----|
| <i>Acidobacteria sp.</i> Ellin345      | Acidobacteria         | 2  | 2  |
| <i>Solibacter usitatus</i> Ellin6076   | Solibacteres          | 2  | 2  |
| <i>Flavobacterium johnsoniae</i> UW101 | Flavobacteria         | 4  | 4  |
| <i>Salinibacter ruber</i> DSM 13855    | Sphingobacteria       | 1  | 1  |
| <i>Nostoc punctiforme</i> PCC 73102    | Cyanobacteria         | 1  | 1  |
| <i>Synechococcus sp.</i> RS9916        | Cyanobacteria         | 1  | 1  |
| Fungi                                  |                       |    |    |
| <i>Rhizopus oryzae</i>                 | Mucormycetes          | 15 | 15 |
| <i>Saccharomyces cerevisiae</i>        | Saccharomycetes       | 2  | 2  |
| <i>Kluyveromyces lactis</i>            | Saccharomycetes       | 2  | 2  |
| <i>Candida albicans</i>                | Saccharomycetes       | 5  | 5  |
| <i>Lodderomyces elongisporus</i>       | Saccharomycetes       | 4  | 4  |
| <i>Schizosaccharomyces pombe</i>       | Schizosaccharomycetes | 1  | 1  |
| <i>Gibberella zeae</i>                 | Sordariomycetes       | 19 | 19 |
| <i>Hypocrea jecorina</i>               | Sordariomycetes       | 20 | 20 |

|                                                  |                        |          |          |
|--------------------------------------------------|------------------------|----------|----------|
| <i>Neurospora crassa</i>                         | Sordariomycetes        | 12       | 12       |
| <i>Magnaporthe grisea</i>                        | Sordariomycetes        | 15       | 15       |
| <b><i>Metarhizium anisopliae</i><sup>a</sup></b> | <b>Sordariomycetes</b> | <b>2</b> | <b>2</b> |
| <i>Botryotinia fuckeliana</i>                    | Leotiomycetes          | 10       | 10       |
| <i>Sclerotinia sclerotiorum</i>                  | Leotiomycetes          | 14       | 14       |
| <i>Emericella nidulans</i>                       | Eurotiomycetes         | 20       | 20       |
| <i>Coccidioides immitis</i>                      | Eurotiomycetes         | 9        | 9        |
| <i>Ajellomyces capsulatus</i>                    | Eurotiomycetes         | 9        | 9        |
| <i>Phaeosphaeria nodorum</i>                     | Dothideomycetes        | 18       | 18       |
| <i>Phanerochaete chrysosporium</i>               | Homobasidiomycetes     | 10       | 10       |
| <i>Coprinopsis cinerea</i>                       | Homobasidiomycetes     | 8        | 8        |
| <i>Laccaria bicolor</i>                          | Homobasidiomycetes     | 11       | 11       |
| <i>Filobasidiella neoformans</i>                 | Heterobasidiomycetes   | 4        | 4        |
| <i>Ustilago maydis</i>                           | Ustilaginomycetes      | 3        | 3        |

Archaea

|                                 |               |   |   |
|---------------------------------|---------------|---|---|
| <i>Pyrococcus furiosus</i>      | Euryarchaeota | 2 | 2 |
| <i>Pyrococcus kodakaraensis</i> | Euryarchaeota | 1 | 2 |
| <i>Halobacterium sp.</i>        | Euryarchaeota | 2 | 2 |

---

<sup>a</sup> Bold text indicate single proteins retrieved from GenBank.

Table S3

Domain-structure of all GH18s examined in the current work, as predicted by InterProScan (Zdobnov and Apweiler, 2001), Conserved Domain Database (Marchler-Bauer et al., 2005) or Pfam (Finn et al., 2006). Numbers refers to the domain-order, from the amino-terminal start towards the carboxy-terminal end of the proteins.

## Group A-II

| Protein and species                      | Taxonomic group | Glycoside hydrolase, family 18, catalytic domain | Endoplasmic reticulum targeting sequence | Predicted hydrolase domain | Signal peptide | Chitin-binding type 1 domain |
|------------------------------------------|-----------------|--------------------------------------------------|------------------------------------------|----------------------------|----------------|------------------------------|
| 02650 <i>A. capsulatum</i>               | Eurotiomycetes  | 1 <sup>1</sup>                                   |                                          |                            |                |                              |
| AN0221 <i>E. nidulans</i>                | Eurotiomycetes  | 1 <sup>1</sup>                                   | 2                                        |                            |                |                              |
| 06020 <i>N. crassa</i>                   | Sordariomycete  | 1 <sup>1</sup>                                   |                                          | 2                          |                |                              |
| 09277 <i>P. nodorum</i>                  | Dothideomycete  | 1 <sup>1</sup>                                   | 2                                        |                            |                |                              |
| EAA76014 <i>G. zeae</i>                  | Sordariomycete  | 1 <sup>1</sup>                                   | 2                                        |                            |                |                              |
| Chi18-4 <i>H. jecorina</i>               | Sordariomycete  | 1 <sup>1</sup>                                   | 2                                        |                            |                |                              |
| 05838 <i>A. capsulatum</i>               | Eurotiomycetes  | 2                                                |                                          |                            | 1              |                              |
| 02644 <i>P. nodorum</i>                  | Dothideomycete  | 1 <sup>1</sup>                                   |                                          |                            |                | 2                            |
| AN11233 <i>E. nidulans</i>               | Eurotiomycetes  | 2                                                |                                          |                            | 1              | 3                            |
| EAA69039 <i>G. zeae</i>                  | Sordariomycete  | 1 <sup>1</sup>                                   |                                          |                            |                | 2                            |
| MGG 06594 <i>M. grisea</i>               | Sordariomycete  | 2 <sup>1</sup>                                   |                                          |                            | 1              | 3                            |
| Chi18-11 <sup>2</sup> <i>H. jecorina</i> | Sordariomycete  | 1 <sup>1</sup>                                   |                                          |                            |                |                              |

<sup>1</sup> Consensus sequence of catalytic domain, (LIVMFY)-(DN)-G-(LIVMF)-(DN)-(LIVMF)-(DN)-X-E is not intact.

<sup>2</sup>Protein sequence is not full-length.

## Group A-III

| Protein and species | Taxonomic group | Signal peptide | Glycoside hydrolase, family 18, catalytic | Phox-domain | Carbohydrate-binding family V/XII |
|---------------------|-----------------|----------------|-------------------------------------------|-------------|-----------------------------------|
|---------------------|-----------------|----------------|-------------------------------------------|-------------|-----------------------------------|

|                                       |                     |   | domain |   |   |
|---------------------------------------|---------------------|---|--------|---|---|
| 01315.1 <i>C. cinerea</i>             | Homobasidiomycete   | 1 | 2      |   |   |
| 03252.1 <i>C. cinerea</i>             | Homobasidiomycete   | 1 | 2      |   |   |
| 246840 <i>L. bicolor</i>              | Homobasidiomycete   | 1 | 2      |   |   |
| 39872 <i>P. chrysosporium</i>         | Homobasidiomycete   |   | 1      |   |   |
| 231399 <i>L. bicolor</i>              | Homobasidiomycete   |   | 1      |   |   |
| 05285.1 <i>C. cinerea</i>             | Homobasidiomycete   | 1 | 2      |   |   |
| 05291.1 <i>C. cinerea</i>             | Homobasidiomycete   | 1 | 2      |   |   |
| 180319 <i>L. bicolor</i>              | Homobasidiomycete   | 1 | 2      |   |   |
| 191848 <i>L. bicolor</i>              | Homobasidiomycete   | 1 | 2      |   |   |
| 310136 <i>L. bicolor</i>              | Homobasidiomycete   | 1 | 2      |   |   |
| 128098 <i>P. chrysosporium</i>        | Homobasidiomycete   |   | 1      |   |   |
| 138098 <i>P. chrysosporium</i>        | Homobasidiomycete   | 1 | 2      |   |   |
| EAA71245 <i>G. zeae</i>               | Sordariomycete      |   | 1      |   |   |
| MGG 04732 <i>M. grisea</i>            | Sordariomycete      | 1 | 2      |   |   |
| 01586.1 <i>C. cinerea</i>             | Homobasidiomycete   |   | 2      | 1 |   |
| 317003 <i>L. bicolor</i>              | Homobasidiomycete   |   | 2      | 1 |   |
| UM06190 <i>U. maydis</i>              | Ustilaginomycete    |   | 1      |   |   |
| 129436 <i>P. chrysosporium</i>        | Homobasidiomycete   |   | 1      |   |   |
| 144643 <sup>2</sup> <i>L. bicolor</i> | Homobasidiomycete   |   | 1      |   |   |
| 04245 <i>F. neoformans</i>            | Heterobasidiomycete | 1 | 2      |   |   |
| 16170 <i>R. oryzae</i>                | Mucormucete         | 1 | 2      |   |   |
| 01334 <i>R. oryzae</i>                | Mucormucete         | 1 | 2      |   |   |
| 13934 <i>R. oryzae</i>                | Mucormucete         | 1 | 2      |   |   |
| 07611 <i>R. oryzae</i>                | Mucormucete         | 1 | 2      |   | 3 |
| 10252 <i>R. oryzae</i>                | Mucormucete         |   | 1      |   |   |
| 14659 <i>R. oryzae</i>                | Mucormucete         | 1 | 2      |   |   |

<sup>1</sup> Consensus sequence of catalytic domain, (LIVMFY)-(DN)-G-(LIVMF)-(DN)-(LIVMF)-(DN)-X-E is not intact.

<sup>2</sup> Protein sequence is not full-length.

#### Group A-IV

| Protein and species | Taxonomic group | Glycoside | 2-S globulin |
|---------------------|-----------------|-----------|--------------|
|---------------------|-----------------|-----------|--------------|

|                              |                 |                                                 |         |
|------------------------------|-----------------|-------------------------------------------------|---------|
|                              |                 | hydrolase,<br>family 18,<br>catalytic<br>domain |         |
| EAA69503 <i>G. zeae</i>      | Sordariomycete  | 1 <sup>1</sup>                                  | 2, 3    |
| Chi18-3 <i>H. jecorina</i>   | Sordariomycete  | 1 <sup>1</sup>                                  | 2, 3    |
| 03026 <i>N. crassa</i>       | Sordariomycete  | 1 <sup>1</sup>                                  |         |
| 01594 <i>B. fuckeliana</i>   | Leotiomycetes   | 1                                               | 2, 3, 4 |
| 05897 <i>S. sclerotiorum</i> | Leotiomycetes   | 1                                               |         |
| 04742 <i>A. capsulatum</i>   | Eurotiomycetes  | 1                                               |         |
| 04750 <i>C. immitis</i>      | Eurotiomycetes  | 1                                               |         |
| 04719 <i>P. nodorum</i>      | Dothideomycetes | 1                                               |         |
| EAA70860 <i>G. zeae</i>      | Sordariomycete  | 1                                               | 2, 3    |
| Chi18-2 <i>H. jecorina</i>   | Sordariomycete  | 1                                               | 2, 3    |
| MGG 08458 <i>M. grisea</i>   | Sordariomycete  | 1                                               |         |

<sup>1</sup> Consensus sequence of catalytic domain, (LIVMFY)-(DN)-G-(LIVMF)-(DN)-(LIVMF)-(DN)-X-E is not intact.

#### Group A-V

| Protein and species           | Taxonomic group | Signal peptide | Glycoside hydrolase, family 18, catalytic domain | Calcium-binding EF-hand | Peptidoglycan-binding LysM | Carbohydrate-binding family V/XII |
|-------------------------------|-----------------|----------------|--------------------------------------------------|-------------------------|----------------------------|-----------------------------------|
| EAA67655<br><i>G. zeae</i>    | Sordariomycete  |                | 1                                                |                         |                            |                                   |
| MGG 05533<br><i>M. grisea</i> | Sordariomycete  | 1              | 2                                                | 3                       |                            |                                   |
| Chi18-6<br><i>H. jecorina</i> | Sordariomycete  | 1              | 2                                                |                         |                            |                                   |
| MGG 01247<br><i>M. grisea</i> | Sordariomycete  |                | 1                                                |                         |                            |                                   |



|                          |                |   |   |  |   |  |
|--------------------------|----------------|---|---|--|---|--|
| 03209<br>N. crassa       | Sordariomycete | 1 | 2 |  |   |  |
| EAA73155<br>G. zeae      | Sordariomycete |   | 1 |  |   |  |
| Chi18-5<br>H. jecorina   | Sordariomycete | 1 | 2 |  |   |  |
| EAA74986<br>G. zeae      | Sordariomycete |   | 1 |  |   |  |
| MGG 00086<br>M. grisea   | Sordariomycete | 1 | 2 |  |   |  |
| 04883<br>N. crassa       | Sordariomycete |   | 1 |  |   |  |
| EAA74223<br>G. zeae      | Sordariomycete |   | 1 |  |   |  |
| Chi18-7<br>H. jecorina   | Sordariomycete |   | 1 |  |   |  |
| MGG 07927<br>M. grisea   | Sordariomycete |   | 1 |  |   |  |
| 04554<br>N. crassa       | Sordariomycete |   | 1 |  |   |  |
| 05350<br>B. fuckeliana   | Leotiomycetes  |   | 1 |  |   |  |
| 11304<br>S. sclerotiorum | Leotiomycetes  |   | 1 |  |   |  |
| 11407<br>B. fuckeliana   | Leotiomycetes  | 1 | 2 |  |   |  |
| 11700<br>S. sclerotiorum | Leotiomycetes  | 1 | 2 |  |   |  |
| 08020<br>S. sclerotiorum | Leotiomycetes  |   | 1 |  |   |  |
| 01250<br>A. capsulatum   | Eurotiomycetes |   | 2 |  | 1 |  |

|                            |                      |   |   |  |   |   |
|----------------------------|----------------------|---|---|--|---|---|
| 05250<br>C. immitis        | Eurotiomycetes       |   | 2 |  | 1 |   |
| 05886<br>A. capsulatum     | Eurotiomycetes       | 1 | 2 |  |   |   |
| 06565<br>A. capsulatum     | Eurotiomycetes       | 1 | 2 |  |   |   |
| 03822<br>C. immitis        | Eurotiomycetes       |   | 1 |  |   |   |
| 02795<br>C. immitis        | Eurotiomycetes       |   | 1 |  |   |   |
| AN5454<br>E. nidulans      | Eurotiomycetes       |   | 1 |  |   |   |
| AN4871<br>E. nidulans      | Eurotiomycetes       | 1 | 2 |  |   |   |
| 00269<br>P. nodorum        | Dothideomycetes      |   | 1 |  |   |   |
| 12247<br>P. nodorum        | Dothideomycetes      |   | 1 |  |   |   |
| 14474<br>P. nodorum        | Dothideomycetes      | 1 | 2 |  |   |   |
| 04870.1<br>C. cinereus     | Homobasidiomycetes   | 1 | 2 |  |   |   |
| 124149<br>P. chrysosporium | Homobasidiomycetes   |   | 1 |  |   |   |
| 03412<br>F. neoformans     | Heterobasidiomycetes | 1 | 2 |  |   |   |
| 09921.1<br>C. cinereus     | Homobasidiomycetes   | 1 | 2 |  |   | 4 |
| 134311<br>P. chrysosporium | Homobasidiomycetes   |   | 1 |  |   | 2 |
| 13635<br>R. oryzae         | Mucormycetes         |   | 1 |  |   |   |

|                          |                   |  |   |  |  |  |
|--------------------------|-------------------|--|---|--|--|--|
| UM04261<br>U. maydis     | Ustilaginomycetes |  | 1 |  |  |  |
| CHT4<br>C. albicans      | Saccharomycetes   |  | 1 |  |  |  |
| 01119<br>L. elongisporum | Saccharomycetes   |  | 1 |  |  |  |
| XP 454053<br>K. lactis   | Saccharomycetes   |  | 1 |  |  |  |
| CTS2<br>S. cerevisiae    | Saccharomycetes   |  | 1 |  |  |  |

#### Group C-I

| Protein and species   | Taxonomic group | Chitin-binding type 1 domain | Glycoside hydrolase, family 18, catalytic domain | Signal peptide | Ankyrin repeats                  | Endoplasmic reticulum targeting | Glu/Leu/Phe/Val dehydrogenase | Inorganic pyrophosphatase | Cysteine peptidase active site | Homeo domain-like, DNA-binding | Calcium-binding EF-hand | DNA-binding spore protein | Sas10/Utp3 |
|-----------------------|-----------------|------------------------------|--------------------------------------------------|----------------|----------------------------------|---------------------------------|-------------------------------|---------------------------|--------------------------------|--------------------------------|-------------------------|---------------------------|------------|
| AN0549 E. nidulans    | Eurotiomycetes  | 1, 2, 3                      | 4                                                |                |                                  |                                 |                               |                           |                                |                                |                         |                           |            |
| AN8481 E. nidulans    | Eurotiomycetes  | 1                            | 2                                                |                |                                  |                                 |                               |                           |                                |                                |                         |                           |            |
| 12510 S. sclerotiorum | Leotiomyces     | 1                            | 2                                                |                |                                  |                                 |                               |                           |                                |                                |                         |                           |            |
| EAA74768 G. zeae      | Sordariomycete  | 1, 2                         | 3                                                |                |                                  |                                 |                               |                           |                                |                                |                         |                           |            |
| 07035 N. crassa       | Sordariomycete  |                              | 2                                                | 1              |                                  |                                 |                               |                           |                                |                                |                         |                           |            |
| EAA78168 G. zeae      | Sordariomycete  | 1                            | 2 <sup>1</sup>                                   |                |                                  |                                 |                               |                           |                                |                                |                         |                           |            |
| 00773 S. sclerotiorum | Leotiomyces     | 2                            | 3 <sup>1</sup>                                   | 1              | 4, 5, 6, 7, 8, 9, 10, 11, 12, 13 |                                 |                               |                           |                                |                                |                         |                           |            |
| AN9390 E. nidulans    | Eurotiomycetes  | 1                            | 2                                                |                |                                  |                                 |                               |                           |                                |                                |                         |                           |            |
| MGG 04534 M. grisea   | Sordariomycete  | 2                            | 3                                                | 1              |                                  | 4                               |                               |                           |                                |                                |                         |                           |            |
| AN0517 E. nidulans    | Eurotiomycetes  | 1, 2                         | 3                                                |                |                                  |                                 | 4                             |                           |                                |                                |                         |                           |            |

|                              |                 |      |                |   |  |  |  |   |   |   |   |   |   |
|------------------------------|-----------------|------|----------------|---|--|--|--|---|---|---|---|---|---|
| AN0541 <i>E. nidulans</i>    | Eurotiomycetes  |      | 1              |   |  |  |  | 2 |   |   |   |   |   |
| AN5077 <i>E. nidulans</i>    | Eurotiomycetes  | 1, 2 | 3              |   |  |  |  |   | 4 | 5 |   |   |   |
| 05454 <i>S. sclerotiorum</i> | Leotiomycetes   | 2, 3 | 4              | 1 |  |  |  |   |   |   | 5 |   |   |
| 04761 <i>C. immitis</i>      | Eurotiomycetes  | 1    | 2              |   |  |  |  |   |   |   |   | 3 |   |
| 14527 <i>P. nodorum</i>      | Dothideomycetes |      | 1              |   |  |  |  |   |   |   |   |   |   |
| 04323 <i>A. capsulatum</i>   | Eurotiomycetes  |      | 1              |   |  |  |  |   |   |   |   |   |   |
| EAA75711 <i>G. zeae</i>      | Sordariomycete  | 1, 2 | 3 <sup>1</sup> |   |  |  |  |   |   |   |   |   |   |
| 15411 <i>P. nodorum</i>      | Dothideomycetes | 1    | 2 <sup>1</sup> |   |  |  |  |   |   |   |   |   |   |
| MGG 01336 <i>M. grisea</i>   | Sordariomycete  | 2    | 3 <sup>1</sup> | 1 |  |  |  |   |   |   |   |   |   |
| 00677 <i>S. sclerotiorum</i> | Leotiomycetes   | 2    | 3 <sup>1</sup> | 1 |  |  |  |   |   |   |   |   |   |
| 00533 <i>B. fuckeliana</i>   | Leotiomycetes   | 2    | 3 <sup>1</sup> |   |  |  |  |   |   |   |   |   | 1 |
| 02214 <i>P. nodorum</i>      | Dothideomycetes | 1    | 2 <sup>1</sup> |   |  |  |  |   |   |   |   |   |   |

<sup>1</sup> Consensus sequence of catalytic domain, (LIVMFY)-(DN)-G-(LIVMF)-(DN)-(LIVMF)-(DN)-X-E is not intact.

#### Group C-II

| Protein and species          | Taxonomic group | Signal peptide | Peptidoglycan-binding LysM | Chitin-binding type 1 domain | Glycoside hydrolase, family 18, catalytic domain | X8-carbohydrate binding | Transmembrane regions | EGF-like region | Neisseria TspB |
|------------------------------|-----------------|----------------|----------------------------|------------------------------|--------------------------------------------------|-------------------------|-----------------------|-----------------|----------------|
| AN0509 <i>E. nidulans</i>    | Eurotiomycetes  |                |                            | 1                            | 2                                                |                         |                       |                 |                |
| 07484 <i>N. crassa</i>       | Sordariomycete  | 1              | 2, 3                       | 3                            | 4                                                | 5                       | 6, 7                  |                 |                |
| 05317 <i>N. crassa</i>       | Sordariomycete  |                | 1                          | 2                            | 3                                                |                         |                       |                 |                |
| EAA68447 <i>G. zeae</i>      | Sordariomycete  |                | 1, 2                       | 3                            | 4                                                |                         |                       |                 |                |
| 02128 <i>S. sclerotiorum</i> | Leotiomycetes   |                | 1                          | 2                            | 3                                                |                         |                       |                 |                |
| Chi18-1 <i>H. jecorina</i>   | Sordariomycete  | 1              | 2, 3                       | 4                            | 5 <sup>1</sup>                                   |                         |                       |                 |                |
| AN7613 <i>E. nidulans</i>    | Eurotiomycetes  |                | 1                          | 2                            | 3                                                |                         |                       |                 |                |
| EAA77156 <i>G. zeae</i>      | Sordariomycete  |                | 1, 2                       | 3                            | 4                                                |                         |                       |                 |                |
| Chi18-10 <i>H. jecorina</i>  | Sordariomycete  | 1              | 2, 3                       | 4                            | 5                                                |                         |                       | 6               |                |
| Chi18-8 <i>H. jecorina</i>   | Sordariomycete  | 1              | 2, 3                       | 4                            | 5                                                |                         |                       |                 |                |
| Chi18-9 <i>H. jecorina</i>   | Sordariomycete  | 1              | 2, 3                       | 4                            | 5                                                |                         |                       |                 | 6              |

<sup>1</sup> Consensus sequence of catalytic domain, (LIVMFY)-(DN)-G-(LIVMF)-(DN)-(LIVMF)-(DN)-X-E is not intact.

Group I

| Protein and species               | Taxonomic group     | Immunoglobulin-like fold <sup>1</sup> | Glycoside hydrolase, family 18, catalytic domain | Endoplasmic reticulum targeting sequence | PKD-domain | Carbohydrate-binding family V/XII domain <sup>2</sup> | Gonadotropin-releasing hormone domain | Lipid attachment site | Kringle-like fold |
|-----------------------------------|---------------------|---------------------------------------|--------------------------------------------------|------------------------------------------|------------|-------------------------------------------------------|---------------------------------------|-----------------------|-------------------|
| O10363<br>O. pseudotsugata MNPV   | Baculoviridae       | 1                                     | 2                                                | 3                                        |            |                                                       |                                       |                       |                   |
| AAP29899<br>C. fumiferana MNPV    | Baculoviridae       | 1                                     | 2                                                | 3                                        |            |                                                       |                                       |                       |                   |
| AAV73807<br>B. mori NPV           | Baculoviridae       | 1                                     | 2                                                | 3                                        |            |                                                       |                                       |                       |                   |
| AAL56186<br>H. zea SNPV           | Baculoviridae       | 1                                     | 2                                                | 3                                        |            |                                                       |                                       |                       |                   |
| AAF33549<br>S. exigua NPV         | Baculoviridae       | 1                                     | 2 <sup>3</sup>                                   | 3                                        |            |                                                       |                                       |                       |                   |
| AAZ38189<br>A. segetum NPV        | Baculoviridae       | 1                                     | 2                                                |                                          |            |                                                       |                                       |                       |                   |
| AAS82706<br>A. segetum GV         | Baculoviridae       | 1                                     | 2                                                |                                          |            |                                                       |                                       |                       |                   |
| ZP 01161077<br>Photobacterium sp. | Gammaproteobacteria | 1                                     | 2                                                |                                          | 3          | 4, 5                                                  | 6                                     |                       |                   |
| ZP 01236284<br>V. angustum        | Gammaproteobacteria | 1                                     | 2                                                |                                          | 3          | 4, 5                                                  | 6                                     |                       |                   |
| ZP 01159013<br>Photobacterium sp. | Gammaproteobacteria | 1                                     | 2                                                |                                          | 3, 4       | 5                                                     |                                       |                       |                   |
| ZP 01233025<br>V. angustum        | Gammaproteobacteria | 1                                     | 2                                                |                                          | 3, 4       | 5                                                     |                                       |                       |                   |
| AAO08114<br>V. vulnificus         | Gammaproteobacteria | 1                                     | 2                                                |                                          | 3, 4       | 5                                                     |                                       |                       |                   |
| NP 232428                         | Gammaproteobacteria | 1                                     | 2                                                |                                          | 3, 4       | 5                                                     |                                       |                       |                   |

|                                   |                     |   |                    |  |  |         |  |   |   |
|-----------------------------------|---------------------|---|--------------------|--|--|---------|--|---|---|
| V. cholerae                       |                     |   |                    |  |  |         |  |   |   |
| YP 435912<br>H. chejuensis        | Gammaproteobacteria |   | 3                  |  |  | 1, 2    |  |   |   |
| YP 529337.1<br>S. degradans       | Gammaproteobacteria | 4 | 2 <sup>4</sup> , 5 |  |  |         |  | 1 | 3 |
| ZP 01159325<br>Photobacterium sp. | Gammaproteobacteria |   | 1                  |  |  |         |  |   |   |
| ZP 01235109<br>V. angustum        | Gammaproteobacteria |   | 1                  |  |  |         |  |   |   |
| AAO07498<br>V. vulnificus         | Gammaproteobacteria |   | 1                  |  |  |         |  |   |   |
| ZP 01160869<br>Photobacterium sp. | Gammaproteobacteria |   | 1 <sup>3</sup>     |  |  |         |  |   |   |
| ZP 01235465<br>V. angustum        | Gammaproteobacteria |   | 1 <sup>3</sup>     |  |  |         |  |   |   |
| YP 432951<br>H. chejuensis        | Gammaproteobacteria |   | 4                  |  |  | 1, 2, 3 |  |   |   |

<sup>1</sup> Also classified as PKD-domain and Chitinase A N-terminal-domain.

<sup>2</sup> Also classified as Chitin-binding domain, type 3.

<sup>3</sup> Consensus sequence of catalytic domain, (LIVMFY)-(DN)-G-(LIVMF)-(DN)-(LIVMF)-(DN)-X-E is not intact.

<sup>4</sup> The catalytic domain originates from the cluster A.

## Group II

| Protein and species              | Taxonomic group | Glycoside hydrolase, family 18, catalytic domain | Carbohydrate-binding family V/XII | Carbohydrate-binding, CenC-like / Galactose-binding like | Cellulose-binding, family II, bacterial type | Fibronectin, type III | PKD-domain | Signal peptide | Calcium-binding EF-hand |
|----------------------------------|-----------------|--------------------------------------------------|-----------------------------------|----------------------------------------------------------|----------------------------------------------|-----------------------|------------|----------------|-------------------------|
| ZP 01137509<br>A. cellulolyticus | Actinobacteria  | 1                                                | 2                                 | 3                                                        |                                              |                       |            |                |                         |
| ZP 01136287<br>A. cellulolyticus | Actinobacteria  | 1                                                |                                   |                                                          |                                              |                       |            |                |                         |
| ChiE                             | Actinobacteria  | 5                                                |                                   |                                                          | 1                                            | 2, 3, 4               |            |                |                         |

|                             |                     |   |      |  |   |      |         |   |   |
|-----------------------------|---------------------|---|------|--|---|------|---------|---|---|
| S. coelicolor               |                     |   |      |  |   |      |         |   |   |
| NP 903910<br>C. violaceum   | Betaproteobacteria  | 2 | 1    |  |   |      |         |   |   |
| ChiC<br>S. coelicolor       | Actinobacteria      | 4 |      |  | 1 | 2, 3 |         |   |   |
| ChiD<br>S. coelicolor       | Actinobacteria      | 1 |      |  |   |      |         |   |   |
| YP 529072.1<br>S. degradans | Gammaproteobacteria | 6 | 1, 3 |  |   |      | 2, 4, 5 |   |   |
| ZP 01431615<br>S. tropica   | Actinobacteria      | 3 |      |  | 2 |      |         | 1 | 4 |

### Group III

| Protein and species          | Taxonomic group     | Glycoside hydrolase, family 18, catalytic domain | Fibronectin, type III | Cellulose-binding, family II, bacterial type | Aminoacyl-tRNA synthetase | Lipid attachment site | Carbohydrate-binding family V/XII |
|------------------------------|---------------------|--------------------------------------------------|-----------------------|----------------------------------------------|---------------------------|-----------------------|-----------------------------------|
| ZP 00739282 B. thuringiensis | Bacilli             | 1                                                | 2                     | 3                                            | 4                         |                       |                                   |
| NP 976824 B. cereus          | Bacilli             | 1                                                | 2                     | 3                                            | 4                         |                       |                                   |
| YP 077581 B. licheniformis   | Bacilli             | 1                                                | 2                     | 3                                            |                           |                       |                                   |
| 631138 M. xanthus            | Deltaproteobacteria | 3                                                |                       |                                              |                           | 1                     | 2                                 |

### Group V

| Protein and species | Taxonomic group | Glycoside hydrolase, family 18, catalytic domain | Carbohydrate binding family 6 | Lipid attachment site | Carbohydrate-binding family V/XII | Orn/DAP/Arg decarboxylase 2 |
|---------------------|-----------------|--------------------------------------------------|-------------------------------|-----------------------|-----------------------------------|-----------------------------|
| ZP 01247029 F.      | Flavobacteria   | 1                                                | 2                             |                       |                                   |                             |

|                                |                     |                   |   |   |      |   |
|--------------------------------|---------------------|-------------------|---|---|------|---|
| johnsoniae                     |                     |                   |   |   |      |   |
| ZP 01245634 F. johnsoniae      | Flavobacteria       | 2                 |   | 1 |      |   |
| ZP 01234549 V. angustum        | Gammaproteobacteria | 2                 |   | 1 |      |   |
| ZP 01160697 Photobacterium sp. | Gammaproteobacteria | 2                 |   | 1 |      |   |
| ZP 01158584 Photobacterium sp. | Gammaproteobacteria | 1                 |   |   |      |   |
| YP 434282 H. chejuensis        | Gammaproteobacteria | 1                 | 2 |   |      |   |
| YP 436543 H. chejuensis        | Gammaproteobacteria | 1, 4 <sup>1</sup> |   |   | 2, 3 | 5 |

<sup>1</sup> The catalytic domain originates from the cluster B, group IVa.

#### Group VI

| Protein and species            | Taxonomic group     | PKD-domain               | Carbohydrate-binding family V/XII | Glycoside hydrolase, family 18, catalytic domain | Chitinase, C-terminal-domain | DNA-directed DNA polymerase B | Chitin-binding domain type 3 | Immunoglobulin-like fold | Lipid attachment site | Kring-like fold | Signal peptide |
|--------------------------------|---------------------|--------------------------|-----------------------------------|--------------------------------------------------|------------------------------|-------------------------------|------------------------------|--------------------------|-----------------------|-----------------|----------------|
| YP 432439 H. chejuensis        | Gammaproteobacteria |                          | 1, 3                              | 2                                                |                              |                               |                              |                          |                       |                 |                |
| YP 529449 S. degradans         | Gammaproteobacteria | 1 <sup>1</sup> , 2, 3, 4 | 7                                 | 5                                                | 6                            |                               |                              |                          |                       |                 |                |
| ChiI S. coelicolor             | Actinobacteria      |                          | 3                                 | 1                                                | 2                            |                               |                              |                          |                       |                 |                |
| YP 077582 B. licheniformis     | Bacilli             |                          |                                   | 1                                                | 2                            |                               |                              |                          |                       |                 |                |
| NP 902986 C. violaceum         | Betaproteobacteria  |                          | 1                                 | 2                                                | 3                            |                               |                              |                          |                       |                 |                |
| ZP 01159608 Photobacterium sp. | Gammaproteobacteria |                          | 1, 5                              | 3                                                | 4                            | 2                             |                              |                          |                       |                 |                |



|                                   |                     |                |                |                   |   |   |   |                |   |   |   |
|-----------------------------------|---------------------|----------------|----------------|-------------------|---|---|---|----------------|---|---|---|
| ZP 01234708<br><i>V. angustum</i> | Gammaproteobacteria |                | 1, 5           | 3                 | 4 | 2 |   |                |   |   |   |
| NP 233087<br><i>V. cholerae</i>   | Gammaproteobacteria | 2 <sup>2</sup> | 1              | 3                 | 4 |   | 5 |                |   |   |   |
| AAO07185<br><i>V. vulnificus</i>  | Gammaproteobacteria |                | 1              | 2                 | 3 |   | 4 |                |   |   |   |
| NP 230718<br><i>V. cholerae</i>   | Gammaproteobacteria |                | 5 <sup>3</sup> | 2                 | 3 |   |   | 1              |   |   |   |
| YP 529337.1 <i>S. degradans</i>   | Gammaproteobacteria |                |                | 2, 5 <sup>4</sup> |   |   |   | 4 <sup>1</sup> | 1 | 3 |   |
| ChiB <i>S. marcescens</i>         | Gammaproteobacteria |                | 3 <sup>3</sup> | 2                 |   |   |   |                |   |   | 1 |

<sup>1</sup> Also classified as Chitinase A N-terminal-domain

<sup>2</sup> Also classified as Immunoglobulin-like fold

<sup>3</sup> Also classified as Chitin-binding domain type 3-domain

<sup>4</sup> The catalytic domain originates from the cluster A, group I.

#### Group VII

| Protein and species                   | Taxonomic group | Peptidoglycan-binding LysM | Glycoside hydrolase, family 18, catalytic domain | Bacterial SH3-like region |
|---------------------------------------|-----------------|----------------------------|--------------------------------------------------|---------------------------|
| NP 979924 <i>B. cereus</i>            | Bacilli         | 1, 2                       | 3 <sup>1</sup>                                   |                           |
| YP 077302 <i>B. licheniformis</i>     | Bacilli         | 1, 2                       | 3 <sup>1</sup>                                   |                           |
| YP 074366 <i>S. thermophilum</i>      | Actinobacteria  | 1, 2                       | 3 <sup>1</sup>                                   |                           |
| YP 075811 <i>S. thermophilum</i>      | Actinobacteria  | 1, 2                       | 3 <sup>1</sup>                                   |                           |
| ZP 01354047 <i>C. phytofermentans</i> | Clostridia      | 1, 2                       | 3 <sup>1</sup>                                   |                           |
| YP 079121 <i>B.</i>                   | Bacilli         | 1, 2                       | 3 <sup>1</sup>                                   |                           |

|                                |                    |      |                |   |
|--------------------------------|--------------------|------|----------------|---|
| licheniformis                  |                    |      |                |   |
| YP 091539 B. licheniformis     | Bacilli            | 1, 2 | 3 <sup>1</sup> |   |
| YP 075619 S. thermophilum      | Actinobacteria     |      | 1 <sup>1</sup> |   |
| NP 902406 C. violaceum         | Betaproteobacteria |      | 1 <sup>1</sup> |   |
| ZP 01136704 A. cellulolyticus  | Actinobacteria     |      | 1 <sup>1</sup> |   |
| ZP 00526542 S. usitatus        | Solibacteres       |      | 1 <sup>1</sup> |   |
| ZP 01354926 C. phytofermentans | Clostridia         |      | 2              | 1 |

<sup>1</sup> Consensus sequence of catalytic domain, (LIVMFY)-(DN)-G-(LIVMF)-(DN)-(LIVMF)-(DN)-X-E is not intact.

#### Group VIII

| Protein and species            | Taxonomic group | Glycoside hydrolase, family 18, catalytic domain | Fibronectin, type III | Carbohydrate-binding family V/XII |
|--------------------------------|-----------------|--------------------------------------------------|-----------------------|-----------------------------------|
| NP 469498 L. innocua           | Bacilli         | 1 <sup>1</sup>                                   | 2                     | 3                                 |
| YP 012734 L. monocytogenes     | Bacilli         | 1 <sup>1</sup>                                   | 2                     | 3                                 |
| ZP 01246933 F. johnsoniae      | Flavobacteria   | 1                                                |                       |                                   |
| ZP 01354150 C. phytofermentans | Clostridia      | 1                                                |                       |                                   |

<sup>1</sup> Consensus sequence of catalytic domain, (LIVMFY)-(DN)-G-(LIVMF)-(DN)-(LIVMF)-(DN)-X-E is not intact.

Group Archaeal (Cluster A)

| Protein and species           | Taxonomic group | Fibronectin type III | Carbohydrate-binding family V/XII | Glycoside hydrolase, family 18, catalytic domain | Proline rich extensin signature | Cellulose-binding, family II, bacterial type | PKD-domain | Haem peroxidase, plant/fungal/bacterial |
|-------------------------------|-----------------|----------------------|-----------------------------------|--------------------------------------------------|---------------------------------|----------------------------------------------|------------|-----------------------------------------|
| ChiA<br>P. kodakaraensis      | Euryarchaeota   | 1, 3                 | 2                                 | 4, 7 <sup>1</sup>                                |                                 | 5, 6                                         |            |                                         |
| Q8U1H4<br>P. furiosus         | Euryarchaeota   | 1, 3                 | 2                                 | 4                                                |                                 |                                              |            |                                         |
| Q8U1H5<br>P. furiosus         | Euryarchaeota   |                      |                                   | 1                                                | 2, 3, 4, 6                      | 5                                            |            |                                         |
| AAG19274<br>Halobacterium sp. | Euryarchaeota   |                      | 1                                 | 3                                                |                                 |                                              | 2          |                                         |
| AAG19275<br>Halobacterium sp. | Euryarchaeota   |                      | 1                                 | 4                                                |                                 |                                              | 2          | 3                                       |

<sup>1</sup> The catalytic domain originates from cluster C.

Group *C. elegans* (Cluster A)

| Protein and species   | Taxonomic group | Glycoside hydrolase, family 18, catalytic domain | Transmembrane region | Chitin-binding, type 1-domain | Peptidoglycan-binding LysM | Plant self-incompatibility S1 |
|-----------------------|-----------------|--------------------------------------------------|----------------------|-------------------------------|----------------------------|-------------------------------|
| CE06282<br>C. elegans | Rhabditida      | 1 <sup>1</sup>                                   |                      |                               |                            |                               |
| CE23907<br>C. elegans | Rhabditida      | 2 <sup>1</sup>                                   | 1                    |                               |                            |                               |
| CE40270<br>C. elegans | Rhabditida      | 1 <sup>1</sup>                                   |                      |                               |                            |                               |
| CE03547<br>C. elegans | Rhabditida      | 1 <sup>1</sup>                                   |                      |                               |                            |                               |
| CE25073<br>C. elegans | Rhabditida      | 1 <sup>1</sup>                                   |                      |                               |                            |                               |

|                       |            |                                 |   |  |  |  |
|-----------------------|------------|---------------------------------|---|--|--|--|
| CE03548<br>C. elegans | Rhabditida | 1 <sup>1</sup>                  |   |  |  |  |
| CE32917<br>C. elegans | Rhabditida | 1 <sup>1</sup>                  |   |  |  |  |
| CE34579<br>C. elegans | Rhabditida | 1 <sup>1</sup>                  |   |  |  |  |
| CE03542<br>C. elegans | Rhabditida | 1 <sup>1</sup>                  |   |  |  |  |
| CE03543<br>C. elegans | Rhabditida | 1 <sup>1</sup>                  |   |  |  |  |
| CE03544<br>C. elegans | Rhabditida | 1 <sup>1</sup>                  |   |  |  |  |
| CE12474<br>C. elegans | Rhabditida | 1 <sup>1</sup>                  |   |  |  |  |
| CE15845<br>C. elegans | Rhabditida | 1 <sup>1</sup> , 2 <sup>1</sup> |   |  |  |  |
| CE32863<br>C. elegans | Rhabditida | 1 <sup>1</sup> , 2 <sup>1</sup> |   |  |  |  |
| CE34961<br>C. elegans | Rhabditida | 1 <sup>1</sup>                  |   |  |  |  |
| CE20043<br>C. elegans | Rhabditida | 1 <sup>1</sup>                  |   |  |  |  |
| CE08731<br>C. elegans | Rhabditida | 1 <sup>1</sup>                  |   |  |  |  |
| CE08730<br>C. elegans | Rhabditida | 1 <sup>1</sup>                  |   |  |  |  |
| CE28638<br>C. elegans | Rhabditida | 2 <sup>1</sup>                  | 1 |  |  |  |
| CE01673<br>C. elegans | Rhabditida | 1 <sup>1</sup>                  |   |  |  |  |
| CE02997<br>C. elegans | Rhabditida | 1 <sup>1</sup>                  |   |  |  |  |

|                       |            |                |  |         |                                                    |    |
|-----------------------|------------|----------------|--|---------|----------------------------------------------------|----|
| CE40296<br>C. elegans | Rhabditida | 1 <sup>1</sup> |  |         |                                                    |    |
| CE02990<br>C. elegans | Rhabditida | 1 <sup>1</sup> |  |         |                                                    |    |
| CE02995<br>C. elegans | Rhabditida | 1 <sup>1</sup> |  |         |                                                    |    |
| CE02993<br>C. elegans | Rhabditida | 1 <sup>1</sup> |  |         |                                                    |    |
| CE02996<br>C. elegans | Rhabditida | 1 <sup>1</sup> |  |         |                                                    |    |
| CE02992<br>C. elegans | Rhabditida | 1 <sup>1</sup> |  |         |                                                    |    |
| CE02999<br>C. elegans | Rhabditida | 1 <sup>1</sup> |  |         |                                                    |    |
| CE02998<br>C. elegans | Rhabditida | 1 <sup>1</sup> |  |         |                                                    |    |
| CE36953<br>C. elegans | Rhabditida | 1              |  | 2, 3, 4 |                                                    |    |
| CE09229<br>C. elegans | Rhabditida | 15             |  | 16, 17  | 1, 2, 3, 4, 5,<br>6, 7, 8, 9,<br>10, 11, 12,<br>13 | 14 |
| CE12928<br>C. elegans | Rhabditida | 7              |  | 8, 9    | 1, 2, 3, 4, 5                                      | 6  |

<sup>1</sup> Consensus sequence of catalytic domain, (LIVMFY)-(DN)-G-(LIVMF)-(DN)-(LIVMF)-(DN)-X-E is not intact.

## **Cluster B**

Group B-I through B-IV

| Protein | Taxonomic group | Signal peptide | Glycoside hydrolase, family 18, | Fungal cellulose binding | Chitin-binding, type 1 | MANSC seven cysteine | Glycoside hydrolase family 18, | Carbohydrate-binding family | Subtilase family, serine |
|---------|-----------------|----------------|---------------------------------|--------------------------|------------------------|----------------------|--------------------------------|-----------------------------|--------------------------|
|---------|-----------------|----------------|---------------------------------|--------------------------|------------------------|----------------------|--------------------------------|-----------------------------|--------------------------|

|                                            |                    |                | catalytic domain | region | domain         | domain | carbohydrate-binding domain | V/XII <sup>3</sup> | active site |
|--------------------------------------------|--------------------|----------------|------------------|--------|----------------|--------|-----------------------------|--------------------|-------------|
| 05455 <i>B. fuckeliana</i>                 | Leotiomyce         | 1              | 2                | 3      |                |        |                             |                    |             |
| 11212 <i>S. sclerotiorum</i>               | Leotiomyce         |                | 1                | 2      |                |        |                             |                    |             |
| 14944 <i>B. fuckeliana</i>                 | Leotiomyce         | 1              | 2                | 3      |                |        |                             |                    |             |
| 08695 <i>S. sclerotiorum</i>               | Leotiomyce         | 1              | 2                | 3      |                |        |                             |                    |             |
| 04500 <i>N. crassa</i>                     | Sordariomyce       |                | 1                | 2      |                |        |                             |                    |             |
| MGG 01333 <i>M. grisea</i>                 | Sordariomyce       | 1              | 2                | 3      |                |        |                             |                    |             |
| AN11059 <i>E. nidulans</i>                 | Eurotiomyce        | 1 <sup>1</sup> | 2                |        |                |        |                             |                    |             |
| 07348 <i>C. immitis</i>                    | Eurotiomyce        |                | 1                |        |                |        |                             |                    |             |
| Chi18-12 <i>H. jecorina</i>                | Sordariomyce       |                | 1                |        |                |        |                             |                    |             |
| Chi18-17 <i>H. jecorina</i>                | Sordariomyce       |                | 1                | 2      |                |        |                             |                    |             |
| 08680 <i>P. nodorum</i>                    | Dothideomycetes    |                | 1                |        |                |        |                             |                    |             |
| 13155 <i>S. sclerotiorum</i>               | Leotiomyce         |                | 1                |        |                |        |                             |                    |             |
| EAA72615 <i>G. zeae</i>                    | Sordariomyce       |                | 1                |        |                |        |                             |                    |             |
| Chi18-18 <i>H. jecorina</i>                | Sordariomyce       |                | 1                |        |                |        |                             |                    |             |
| 02184 <i>N. crassa</i>                     | Sordariomyce       |                | 1                |        |                |        |                             |                    |             |
| MGG 03599 <i>M. grisea</i>                 | Sordariomyce       | 1 <sup>1</sup> | 2                |        | 3 <sup>2</sup> |        |                             |                    |             |
| 16099 <i>R. oryzae</i>                     | Mucormycetes       |                | 1                |        |                |        |                             |                    |             |
| 10112 <i>R. oryzae</i>                     | Mucormycetes       | 1              | 2                |        |                | 3      | 4                           |                    |             |
| 04523 <i>R. oryzae</i>                     | Mucormycetes       |                | 1                |        |                |        | 2                           |                    |             |
| 11152 <i>R. oryzae</i>                     | Mucormycetes       | 1              | 2                |        |                |        | 3                           |                    |             |
| 08153 <i>R. oryzae</i>                     | Mucormycetes       |                | 1                |        |                |        |                             | 2, 3               |             |
| 04407.1 <i>C. cinereus</i>                 | Homobasidiomyce    | 1              | 2                |        |                |        |                             | 3                  |             |
| 40899 <sup>4</sup> <i>P. chrysosporium</i> | Homobasidiomyce    | 1              | 2                |        |                |        |                             |                    |             |
| 6412 <i>P. chrysosporium</i>               | Homobasidiomyce    | 1              | 2                |        |                |        |                             | 3, 4               |             |
| 2991 <i>P. chrysosporium</i>               | Homobasidiomyce    | 1              | 2                |        |                |        |                             | 3                  |             |
| 301747 <i>L. bicolor</i>                   | Homobasidiomyce    | 1              | 2                |        |                |        |                             | 3, 4               |             |
| NP 594130 <i>S. pombe</i>                  | Schizosaccharomyce |                | 1 <sup>5</sup>   |        |                |        |                             |                    |             |

|                                   |                 |   |   |   |   |  |   |  |   |
|-----------------------------------|-----------------|---|---|---|---|--|---|--|---|
|                                   | te              |   |   |   |   |  |   |  |   |
| 00864 P. nodorum                  | Dothideomycetes |   | 1 |   | 2 |  |   |  |   |
| AN8241 E. nidulans                | Eurotiomycete   |   | 1 |   |   |  |   |  |   |
| Chi18-14 H. jecorina              | Sordariomycete  |   | 1 | 3 |   |  |   |  | 2 |
| Chi18-16 H. jecorina              | Sordariomycete  |   | 1 | 2 |   |  |   |  |   |
| CAC07216 M. anisopliae            | Sordariomycete  |   | 1 | 2 |   |  |   |  |   |
| Chi18-13 <sup>4</sup> H. jecorina | Sordariomycete  | 1 | 2 |   |   |  |   |  |   |
| Chi30 M. anisopliae               | Sordariomycete  |   | 1 |   |   |  |   |  |   |
| XP 452410 K. lactis               | Saccharomycete  |   | 1 |   |   |  | 2 |  |   |
| CTS1 S. cerevisiae                | Saccharomycete  |   | 1 |   |   |  | 2 |  |   |
| CHT1 C. albicans                  | Saccharomycete  |   | 1 |   |   |  |   |  |   |
| CHT2 C. albicans                  | Saccharomycete  | 1 | 2 |   |   |  |   |  |   |
| 03890 L. elongisporum             | Saccharomycete  | 1 | 2 |   |   |  |   |  |   |
| CHT3 C. albicans                  | Saccharomycete  | 1 | 2 |   |   |  |   |  |   |
| 05283 L. elongisporum             | Saccharomycete  | 1 | 2 |   |   |  |   |  |   |

<sup>1</sup> Also classified as a Prokaryotic membrane lipoprotein lipid attachment site.

<sup>2</sup> Also classified as a Glycoside hydrolase family 19 catalytic domain.

<sup>3</sup> Also classified as a Chitin-binding domain type 3.

<sup>4</sup> Partial sequence.

<sup>5</sup> Consensus sequence of catalytic domain, (LIVMFY)-(DN)-G-(LIVMF)-(DN)-(LIVMF)-(DN)-X-E is not intact.

### Plant class III

| Protein                | Taxonomic group | Signal peptide | Glycoside hydrolase, family 18, catalytic domain |
|------------------------|-----------------|----------------|--------------------------------------------------|
| BAA21861.1 A. thaliana | Brassicales     | 1 <sup>1</sup> | 2                                                |
| AAG25709 M. domestica  | Rosales         |                | 1                                                |
| ABA26457 C. lanatus    | Cucurbitales    |                | 1                                                |

|                                    |              |   |                |
|------------------------------------|--------------|---|----------------|
| CAJ43737 <i>C. arabica</i>         | Gentianales  |   | 1              |
| Hevamine H. <i>brasiliensis</i>    | Malpighiales |   | 1              |
| Q8L5C6 <i>T. aestivum</i>          | Poales       |   | 1 <sup>2</sup> |
| Q53NL5 <i>O. sativa</i>            | Poales       | 1 | 2 <sup>2</sup> |
| ConcanavalinB <i>C. ensiformis</i> | Fabales      |   | 1 <sup>2</sup> |

<sup>1</sup> Also classified as a Prokaryotic membrane lipoprotein lipid attachment site.

<sup>2</sup> Consensus sequence of catalytic domain, (LIVMFY)-(DN)-G-(LIVMF)-(DN)-(LIVMF)-(DN)-X-E is not intact.

#### Group B-V

| Protein                      | Taxonomic group   | Signal peptide | Glycoside hydrolase, family 18, catalytic domain | Alkaline phosphatase domain | Subtilase serine protease |
|------------------------------|-------------------|----------------|--------------------------------------------------|-----------------------------|---------------------------|
| Chi18-20 <i>H. jecorina</i>  | Sordariomycete    | 1              | 2                                                |                             |                           |
| 08394 <i>N. crassa</i>       | Sordariomycete    |                | 1                                                |                             |                           |
| MGG 01876 <i>M. grisea</i>   | Sordariomycete    | 1              | 2                                                |                             |                           |
| Chi18-19 <i>H. jecorina</i>  | Sordariomycete    |                | 1                                                |                             |                           |
| 01393 <i>N. crassa</i>       | Sordariomycete    |                | 1                                                |                             |                           |
| XP 386145 <i>G. zeae</i>     | Sordariomycete    |                | 1                                                |                             |                           |
| 01513 <i>S. sclerotiorum</i> | Leotiomycete      | 1              | 2                                                |                             |                           |
| 05559 <i>B. fuckeliana</i>   | Leotiomycete      | 1              | 2                                                |                             |                           |
| MGG 04073 <i>M. grisea</i>   | Sordariomycete    |                | 1                                                |                             |                           |
| 06595 <i>C. immitis</i>      | Eurotiomycete     |                | 1                                                |                             |                           |
| AN8245 <i>E. nidulans</i>    | Eurotiomycete     |                | 1                                                | 2                           |                           |
| XP 382346 <i>G. zeae</i>     | Sordariomycete    |                | 1                                                |                             |                           |
| 03420 <i>S. sclerotiorum</i> | Leotiomycete      | 1              | 2                                                |                             |                           |
| 07854 <i>B. fuckeliana</i>   | Leotiomycete      | 1              | 2                                                |                             |                           |
| 236861 <i>L. bicolor</i>     | Homobasidiomycete |                | 1                                                |                             |                           |



|                            |                     |   |   |  |   |
|----------------------------|---------------------|---|---|--|---|
| 185397 <i>L. bicolor</i>   | Homobasidiomycete   |   | 1 |  |   |
| UM02758 <i>U. maydis</i>   | Ustilaginomycete    |   | 2 |  | 1 |
| 02351 <i>F. neoformans</i> | Heterobasidiomycete | 1 | 2 |  |   |

#### Group IVa

| Protein and species                   | Taxonomic group     | Carbohydrate-binding family V/XII <sup>1</sup> | Immunoglobulin-like, PKD domain | Glycoside hydrolase, family 18, catalytic domain | Signal peptide | Fibronectin type III domain | Carbohydrate-binding, CenC-like domain | Bacterial cellulose-binding family II | Carbohydrate-binding fold | Carboxypeptidase regulatory region |
|---------------------------------------|---------------------|------------------------------------------------|---------------------------------|--------------------------------------------------|----------------|-----------------------------|----------------------------------------|---------------------------------------|---------------------------|------------------------------------|
| ZP 01159542 <i>Photobacterium</i> sp. | Gammaproteobacteria | 1, 3                                           | 2                               | 4                                                |                |                             |                                        |                                       |                           |                                    |
| ZP 01234779 <i>V. angustum</i>        | Gammaproteobacteria | 1, 4                                           | 2, 3, 5                         | 6                                                |                |                             |                                        |                                       |                           |                                    |
| NP 231586 <i>V. cholerae</i>          | Gammaproteobacteria | 2, 3                                           |                                 | 4                                                | 1              |                             |                                        |                                       |                           |                                    |
| AAO10239 <i>V. vulnificus</i>         | Gammaproteobacteria | 1, 2                                           | 3                               | 4                                                |                |                             |                                        |                                       |                           |                                    |
| YP 527176.1 <i>S. degradans</i>       | Gammaproteobacteria | 1, 2                                           |                                 | 3                                                |                |                             |                                        |                                       |                           |                                    |
| NP 902605 <i>C. violaceum</i>         | Betaproteobacteria  | 2                                              |                                 | 3                                                | 1 <sup>2</sup> |                             |                                        |                                       |                           |                                    |
| NP 980050 <i>B. cereus</i>            | Bacilli             |                                                |                                 | 1                                                |                |                             |                                        |                                       |                           |                                    |
| ZP 00742457 <i>B. thuringiensis</i>   | Bacilli             |                                                |                                 | 1                                                |                |                             |                                        |                                       |                           |                                    |
| 634143 <i>M. xanthus</i>              | Deltaproteobacteria | 1                                              |                                 | 4                                                |                | 2, 3                        |                                        |                                       |                           |                                    |
| YP 432187 <i>H. chejuensis</i>        | Gammaproteobacteria | 1, 3                                           | 2, 4, 5                         | 6                                                |                |                             |                                        |                                       |                           |                                    |
| YP 436543 <i>H. chejuensis</i>        | Gammaproteobacteria | 2, 3                                           |                                 | 1 <sup>3</sup> , 4                               |                |                             |                                        |                                       |                           |                                    |
| ChiB <i>S. coelicolor</i>             | Actinobacteria      |                                                |                                 | 3                                                |                | 2                           | 1                                      |                                       |                           |                                    |
| ChiA <i>S. coelicolor</i>             | Actinobacteria      |                                                |                                 | 3                                                |                | 2                           | 1                                      |                                       |                           |                                    |

|                                |                |   |  |                    |  |  |  |   |               |   |
|--------------------------------|----------------|---|--|--------------------|--|--|--|---|---------------|---|
| ZP 01353924 C. phytofermentans | Clostridia     | 1 |  | 2                  |  |  |  |   |               |   |
| ZP 01430879 S. tropica         | Actinobacteria |   |  | 2                  |  |  |  | 1 |               |   |
| ZP 01245639 F. johnsoniae      | Flavobacteria  |   |  | 1 <sup>4</sup> , 2 |  |  |  |   | 2, 3, 4, 6, 7 | 5 |
| ChiJ S. coelicolor             | Actinobacteria |   |  | 1                  |  |  |  |   |               |   |
| Chi18-15 H. jecorina           | Sordariomycete |   |  | 1                  |  |  |  |   |               |   |

<sup>1</sup> Also classified as a Chitin-binding domain type 3.

<sup>2</sup> Also classified as a prokaryotic lipoprotein attachment site.

<sup>3</sup> The catalytic domain originates from cluster A, group V.

<sup>4</sup> The catalytic domain originates from cluster A.

#### Group IVb

| Protein and species        | Taxonomic group     | Thioredoxin related fold | Carbohydrate-binding family V/XII <sup>1</sup> | Glycoside hydrolase, family 18, catalytic domain | Fibronectin type III domain | Blue type 1 copper domain | Signal peptide | Bacterial Ig fold |
|----------------------------|---------------------|--------------------------|------------------------------------------------|--------------------------------------------------|-----------------------------|---------------------------|----------------|-------------------|
| YP 349297 P. fluorescens   | Gammaproteobacteria | 1, 3                     |                                                | 2                                                |                             |                           |                |                   |
| YP 608169 P. entomophila   | Gammaproteobacteria |                          |                                                | 1                                                |                             |                           |                |                   |
| ChiC S. marcescens         | Gammaproteobacteria |                          | 3                                              | 1                                                | 2                           |                           |                |                   |
| YP 237842 P. syringae      | Gammaproteobacteria |                          | 6                                              | 1                                                | 2, 3, 4, 5                  | 7                         |                |                   |
| NP 814153 E. faecalis      | Bacilli             |                          |                                                | 1                                                |                             |                           |                |                   |
| YP 014504 L. monocytogenes | Bacilli             | 1, 2                     |                                                | 3                                                |                             |                           |                |                   |
| NP 471330 L. innocua       | Bacilli             | 1, 2                     |                                                | 3                                                |                             |                           |                |                   |
| NP 719615 S.               | Gammaproteobacteria |                          | 2, 3                                           | 1                                                |                             |                           |                |                   |

|                                 |                     |  |      |   |   |  |                |   |
|---------------------------------|---------------------|--|------|---|---|--|----------------|---|
| oneidensis                      | ia                  |  |      |   |   |  |                |   |
| ZP 01236292 V. angustum         | Gammaproteobacteria |  | 4, 5 | 2 |   |  | 1 <sup>2</sup> | 3 |
| YP 071855 Y. pseudotuberculosis | Gammaproteobacteria |  | 3    | 1 | 2 |  |                |   |
| YP 053588 M. florum             | Mollicutes          |  |      | 2 |   |  | 1 <sup>2</sup> |   |

<sup>1</sup> Also classified as a Chitin-binding domain type 3.

<sup>2</sup> Also classified as a prokaryotic lipoprotein attachment site.

## **Cluster C**

| Protein and Species          | Taxonomic group     | Signal peptide | Transmembrane-region | Glycoside hydrolase, family 18 catalytic domain | Carbohydrate-binding family V/XII | Fibronectin type III | Membrane lipoprotein/lipid attachment site | Carbohydrate-binding family II | Serralysin-like metalloprotease | Chitin-binding domain type 3 | Na-Ca exchange domain | Glycoside hydrolase, family 5 (cellulase) | Carbohydrate-binding family IV/IX |
|------------------------------|---------------------|----------------|----------------------|-------------------------------------------------|-----------------------------------|----------------------|--------------------------------------------|--------------------------------|---------------------------------|------------------------------|-----------------------|-------------------------------------------|-----------------------------------|
| 621070 B. cenocepacia        | Betaproteobacteria  | 1              | 2                    | 3                                               | 4, 5                              |                      |                                            |                                |                                 |                              |                       |                                           |                                   |
| ZP 01331104 B. pseudomallei  | Betaproteobacteria  | 1              | 2                    | 3                                               | 4, 5                              |                      |                                            |                                |                                 |                              |                       |                                           |                                   |
| NP 901110 C. violaceum       | Betaproteobacteria  |                |                      | 1                                               | 2, 3                              |                      |                                            |                                |                                 |                              |                       |                                           |                                   |
| ZP 00739603 B. thuringiensis | Bacilli             |                |                      | 2                                               | 1, 5                              | 3, 4                 |                                            |                                |                                 |                              |                       |                                           |                                   |
| YP 124481 L. pneumophila     | Gammaproteobacteria |                |                      | 1                                               |                                   |                      |                                            |                                |                                 |                              |                       |                                           |                                   |
| ChiK S. coelicolor           | Actinobacteria      |                |                      | 2                                               |                                   |                      | 1                                          |                                |                                 |                              |                       |                                           |                                   |
| ZP 00570566 Frankia sp.      | Actinobacteria      |                |                      | 2                                               |                                   |                      |                                            | 1                              |                                 |                              |                       |                                           |                                   |
| ZP 01199781 X.               | Alphaproteobacteria |                |                      | 4                                               | 2                                 | 3                    |                                            |                                | 1                               |                              |                       |                                           |                                   |

|                                  |                         |   |  |                    |   |      |  |      |   |                           |                         |    |   |
|----------------------------------|-------------------------|---|--|--------------------|---|------|--|------|---|---------------------------|-------------------------|----|---|
| autotrophicus                    |                         |   |  |                    |   |      |  |      |   |                           |                         |    |   |
| ChiA P.<br>kodakaraensis         | Euryarchaeot<br>a       |   |  | 4 <sup>1</sup> , 7 | 2 | 1, 3 |  | 5, 6 |   |                           |                         |    |   |
| ZP 00923356 E.<br>coli           | Gammaprotei<br>bacteria | 1 |  | 8                  |   |      |  |      |   | 1, 2,<br>3, 4,<br>5, 6, 7 |                         |    |   |
| ZP 01191795<br>M. flavescens     | Actinobacteri<br>a      |   |  | 4                  |   |      |  | 6, 8 | 1 |                           | 2, 3,<br>5, 7,<br>9, 11 | 10 |   |
| ChiH S.<br>coelicolor            | Actinobacteri<br>a      |   |  | 1                  | 2 |      |  |      |   |                           |                         |    |   |
| ZP 01137245<br>A. cellulolyticus | Actinobacteri<br>a      |   |  | 1                  | 2 |      |  |      |   |                           |                         |    | 3 |

<sup>1</sup> The catalytic domain originates from the Archaea-group, cluster A.
